# Supplementary material for: The whale shark genome reveals patterns of vertebrate gene family evolution
Source: eLife. 2021 Aug 19;10:e65394. doi: 10.7554/eLife.65394 (PMC8455134; doi:10.7554/eLife.65394)
Supplement: Source data 1. [file elife-65394-data1.xlsx]

## Sheet: Sheet1
Statistical test	Software for model-fitting	N	p-value	Manuscript section
Fisher's Exact Test: Enrichment tests for genes gained in the MRCA of Olfactores	R	See Supplementary File 5	See Supplementary File 5	Ancestral Vertebrate Genome Evolution
Fisher's Exact Test: Enrichment tests for genes gained in the MRCA of Vertebrates	R	See Supplementary File 5	See Supplementary File 5	Ancestral Vertebrate Genome Evolution
Fisher's Exact Test: Enrichment tests for genes gained in the MRCA of Gnathostomes	R	See Supplementary File 5	See Supplementary File 5	Ancestral Vertebrate Genome Evolution
Fisher's Exact Test: Enrichment tests for genes gained in the MRCA of Osteichthyes	R	See Supplementary File 5	See Supplementary File 5	Ancestral Vertebrate Genome Evolution
Fisher's Exact Test: Enrichment tests for genes lost in the MRCA of Chondrichthyes	R	See Supplementary File 5	See Supplementary File 5	Ancestral Vertebrate Genome Evolution
Bootstrap support for NLRs	IQ-TREE	167 sequences	NA (assessed by ultrafast bootstrap)	Evolution of jawed vertebrate innate immune receptors
Bootstrap support for RLR CARD domain	IQ-TREE	69 sequences	NA (assessed by ultrafast bootstrap)	Evolution of jawed vertebrate innate immune receptors
Bootstrap support for RLR DEAD domain	IQ-TREE	59 sequences	NA (assessed by ultrafast bootstrap)	Evolution of jawed vertebrate innate immune receptors
Bootstrap support for TLRs	IQ-TREE	558 sequences	NA (assessed by ultrafast bootstrap)	Evolution of jawed vertebrate innate immune receptors
Two-cluster test: Chondrichthyes vs. Osteichthyes	LINTRE	37 spp	0.0004	Rates of functional genomic evolution and gigantism
Two-cluster test: Callorhinchus milii vs. sharks	LINTRE	8 spp	0.0004	Rates of functional genomic evolution and gigantism
Two-cluster test: whale shark vs. brownbanded bamboo shark	LINTRE	37 spp	0.1802	Rates of functional genomic evolution and gigantism
Two-cluster test: Chondrichthyes vs. Ray-Finned Fishes	LINTRE	19 spp	0.0004	Rates of functional genomic evolution and gigantism
Two-cluster test: Chondrichthyes vs. Sarcopterygii	LINTRE	26 spp	0.001	Rates of functional genomic evolution and gigantism
Two-cluster test: Chondrichthyes vs. Coelacanth	LINTRE	9 spp	0.0004	Rates of functional genomic evolution and gigantism
Two-cluster test: Chondrichthyes vs. Tetrapods	LINTRE	25 spp	0.0088	Rates of functional genomic evolution and gigantism
Two-cluster test: Chondrichthyes vs. Lepisosteus	LINTRE	9 spp	0.1416	Rates of functional genomic evolution and gigantism
Two-cluster test: Ray-Finned Fishes vs. Sarcopterygii	LINTRE	37 spp	0.0004	Rates of functional genomic evolution and gigantism
Two-cluster test: Spotted Gar vs. Teleosts	LINTRE	37 spp	0.0004	Rates of functional genomic evolution and gigantism
Likelihood ratio test: Rates of amino acid substitution in branches leading to gigantism versus others	PAML	37 spp	1.76 x 10^-56	Rates of functional genomic evolution and gigantism
Simulation: Rates of gene family size evolution on branches leading to giant taxa vs. null distribution of single global simulated rate	CAFE	37 spp	0.002	Rates of functional genomic evolution and gigantism
Rates of gene family size evolution per gene family	CAFE	See Supplementary File	See Supplementary File	Rates of functional genomic evolution and gigantism
Fisher's Exact Test: Enrichment test for association with cancer for genes with shift in gene family size evolution anywhere in phylogeny	R	1387 genes with rate shift	0.00414	Rates of functional genomic evolution and gigantism
Fisher's Exact Test: Enrichment test for association with cancer for genes with shift in gene family size evolution along branches leading to giant taxa	R	1043 genes with rate shift	0.00199	Rates of functional genomic evolution and gigantism
Fisher's Exact Test: Enrichment test for association with cancer for genes with shift in gene family size evolution along branches leading to sister taxa of giants	R	990 gene families with rate shift	0.624	Rates of functional genomic evolution and gigantism
Permutation: Comparing observed cancer enrichment (odds ratio) to enrichment for randomly selected lineages (equal in number of lineages leading to giant taxa)	R	100 permutations	0.02	Rates of functional genomic evolution and gigantism
Linear Mixed Model	lme4,lmerTest	1387 genes	See coefficient p-values below	Rates of functional genomic evolution and gigantism
Linear Mixed Model: Giant vs. non-giant branch	lme4,lmerTest	1387 genes	5.95x10^-6	Rates of functional genomic evolution and gigantism
Linear Mixed Model: Cancer vs. non-cancer gene	lme4,lmerTest	1387 genes	0.219	Rates of functional genomic evolution and gigantism
Linear Mixed Model: Giant*Cancer interaction	lme4,lmerTest	1387 genes	8.51x10^-5	Rates of functional genomic evolution and gigantism
BAMM: Rate variation in body size evolution	BAMM	571 spp	NA (models sampled using rjMCMC)	Appendix 4
