# Supplementary material for: The whale shark genome reveals patterns of vertebrate gene family evolution
Source: eLife. 2021 Aug 19;10:e65394. doi: 10.7554/eLife.65394 (PMC8455134; doi:10.7554/eLife.65394)
Supplement: Supplementary file 1. [file elife-65394-supp1.xlsx]

## Sheet: Sheet1
	Read et al. 2017	Hara et al. 2018	Weber et al. 2020 (all sequences)	Current assembly
DNA source	male liver and spleen	male liver and spleen (from Read et al. 2017)	male heart	male liver and spleen (same as Read et al. 2017)
Illumina raw read data (Gbp)	275.6	275.6 (from Read et al. 2017)	526	275.6 (from Read et al. 2017)
PacBio raw read data (Gbp)	–	–	–	61.8
Total assembly size (Gbp)	2.57	2.66	3.2	2.96
Number of scaffolds	997976	155537	3305708	39176
Scaffold N50 (Kbp)	5.425	326	2564	149.8
Number of contigs	1213000	15923929	3497228	57333
Contig N50 (bp)	5304	3579	35692	144422
