# Supplementary material for: The whale shark genome reveals patterns of vertebrate gene family evolution
Source: eLife. 2021 Aug 19;10:e65394. doi: 10.7554/eLife.65394 (PMC8455134; doi:10.7554/eLife.65394)
Supplement: Supplementary file 2. — BUSCO v2 and CVG results for brownbanded bamboo shark and cloudy catshark were those reported by Hara et al., 2018 Figure 2—figure supplement 1d, who did not report Complete Single-copy and Complete Duplicate numbers and only reported percentages. Callorhinchus CVG scores are reported on the gVolante database (https://gvolante.riken.jp/script/database.cgi, accessed January 19, 2021). The BUSCO v2 set has 2586 vertebrate orthologs, while the CVG has 233 total genes. Note CVG does not report if complete are single copy or duplicated. Percentages in parentheses. Note also that Callorhinchus was used in the ortholog design of both sets and therefore BUSCO and CVG overestimate its completeness. [file elife-65394-supp2.xlsx]

## Sheet: Sheet1
BUSCO (2,586 total)	Complete	Complete Single copy	Complete Duplicate	Fragments/Partial	Missing
whale shark	2033 (78.7)	1967 (76.1)	66 (2.6)	323 (12.5)	230 (8.8)
Callorhinchus	2459 (95.1)	1603 (62.0)	856 (33.1)	68 (2.6)	59 (2.3)
bamboo shark	-92.6			-5.5	-1.9
cloudy catshark	-81.8			-14.1	-4.1
CVG (233 total)	Complete			Fragments/Partial	Missing
whale shark	199 (85.4)			28 (12.0)	6 (2.6)
Callorhinchus	227 (97.4)			4 (1.7)	2 (0.86)
bamboo shark	-93.9			-3.1	-3
cloudy catshark	-88.2			-8.9	-2.9
