# Supplementary material for: The whale shark genome reveals patterns of vertebrate gene family evolution
Source: eLife. 2021 Aug 19;10:e65394. doi: 10.7554/eLife.65394 (PMC8455134; doi:10.7554/eLife.65394)
Supplement: Supplementary file 3. [file elife-65394-supp3.xlsx]

## Sheet: Sheet1
Species	Common Name	Gene Model Source	Assembly Version
Branchiostoma floridae	Amphioxus	RefSeq	GCF_000003815.1_Version_2
Ciona intestinalis	Sea squirt	Ensembl 89	GCA_000224145.1
Petromyzon marinus	Sea lamprey	Ensembl 89	Pmarinus_7.0
Callorhinchus milii	Elephant Shark, Ghost Shark*	RefSeq	GCF_000165045.1
Chiloscyllium punctatum	Brownbanded Bamboo shark	https://transcriptome.riken.jp/squalomix/	Cpunctatum_v1.0
Scyliorhinus torazame	Cloudy catshark	https://transcriptome.riken.jp/squalomix/	Storazame_v1.0
Carcharodon carcharias	Great white shark	https://datadryad.org/stash/dataset/doi:10.5061/dryad.9r2p3ks	ASM360424v1
Lepisosteus oculatus	Spotted gar	Ensembl 89	LepOcu1
Scleropages formosus	Asian bonytongue	Ensembl 99	ASM162426v1
Danio rerio	Zebrafish	Ensembl 89	GRCz11
Esox lucius	Northern pike	Ensembl 99	Eluc_V3
Oreochromis niloticus	Nile tilapia	Ensembl 89	Orenil1.0
Gadus morhua	Atlantic cod	Ensembl 89	gadMor1
Gasterosteus aculeatus	Three-spined stickleback	Ensembl 89	BROAD S1
Dichotomyctere nigroviridis	Green Spotted Pufferfish	Ensembl 89	TETRAODON 8.0
Takifugu rubripes	Fugu	Ensembl 89	FUGU5
Mola mola	Ocean sunfish	GigaDB: http://dx.doi.org/10.5524/100214	ASM169857v1
Latimeria chalumnae	Coelacanth	Ensembl 89	LatCha1
Xenopus tropicalis	Western clawed frog	Ensembl 89	JGI 4.2
Anolis carolinensis	Green anole	Ensembl 89	AnoCar2.0
Alligator mississippiensis	American alligator	RefSeq	GCF_000281125.3
Gallus gallus	Chicken	Ensembl 89	Gallus_gallus-5.0
Ornithorhynchus anatinus	Platypus	Ensembl 89	OANA5
Monodelphus domestica	Gray short-tailed opposum	Ensembl 89	monDom5
Dasypus novemcinctus	Nine-banded armadillo	Ensembl 89	Dasnov3.0
Loxodonta africana	African elephant	Ensembl 89	loxAfr3
Procavia capensis	Rock hyrax	Ensembl 89	proCap1
Homo sapiens	Human	Ensembl 89	GRCh38
Mus musculus	Mouse	Ensembl 89	GRCm38
Canis lupus familiaris	Dog	Ensembl 89	CanFam3.1
Sus scrofa	Pig	Ensembl 89	Sscrofa10.2
Bos taurus	Cow	Ensembl 89	UMD3.1
Tursiops truncatus	Bottlenose dolphin	Ensembl 89	turTru1
Balaenoptera acutorostrata scammoni	Minke whale	RefSeq	GCF_000493695.1
Balaena mysticetus	Bowhead whale	http://www.bowhead-whale.org/	1
