# Supplementary material for: The whale shark genome reveals patterns of vertebrate gene family evolution
Source: eLife. 2021 Aug 19;10:e65394. doi: 10.7554/eLife.65394 (PMC8455134; doi:10.7554/eLife.65394)
Supplement: Supplementary file 6. — We tested whether or not gene families in the foregrounds were enriched for functional terms and domains (gene ontology [GO], Pfam) relative to the background of what was present at a relevant ancestor. [file elife-65394-supp6.xlsx]

## Sheet: Sheet1
Foreground (n)	Background (n)	Num of significantly enriched terms	Supplementary Files for List of Enriched Functions/Domains
Novel genes for MRCA of Olfactores (989)	Present in MRCA of Olfactores (10255)	13	Supp Table 6
Novel genes for MRCA of vertebrates (714)	Present in MRCA of vertebrates (10738)	14	Supp Table 7
Novel genes for MRCA of gnathostomes (2106)	Present in MRCA of gnathostomes (12815)	33	Supp Table 8
Novel genes for MRCA of Chondrichthyes (124)	Present in MRCA of gnathostomes (12815)	0	–
Novel genes for MRCA of Osteichthyes (298)	Present in MRCA of gnathostomes (12815)	8	Supp Table 9
Gene lost in MRCA of Chondrichthyes (729)	Present in MRCA of gnathostomes (12815)	22	Supp Table 10
Lost in MRCA of Osteichthyes (145)	Present in MRCA of gnathostomes (12815)	0	–
