# Supplementary material for: The whale shark genome reveals patterns of vertebrate gene family evolution
Source: eLife. 2021 Aug 19;10:e65394. doi: 10.7554/eLife.65394 (PMC8455134; doi:10.7554/eLife.65394)
Supplement: Supplementary file 7. — n refers to the number of these gene families with that function gained. p refers to uncorrected p-values for Fisher’s exact test, adj.p refers to the adjusted p-value for multiple testing (see Materials and methods). See Supplementary file 19 for specific assignments of human gene names to each orthogroup. [file elife-65394-supp7.xlsx]

## Sheet: Sheet1
domain id	domain description	n	p	estimated odds.ratio	adj.p	orthogroups	human gene names
PF12796	Ankyrin repeats (3 copies)	34	5.21e-10	4.22448	1.79e-06	OG0000478, OG0000567, OG0000584, OG0001171, OG0001315, OG0001439, OG0001683, OG0001750, OG0001936, OG0002086, OG0002201, OG0002362, OG0002408, OG0002434, OG0002458, OG0003117, OG0003477, OG0004211, OG0005945, OG0006086, OG0006976, OG0007434, OG0007820, OG0008219, OG0008248, OG0008383, OG0009058, OG0009608, OG0010023, OG0010058, OG0010235, OG0010681, OG0011197, OG0011811	ANK1, ANK3, ANK2, ANKRD52, ANKRD44, ANKRD28, ANKRD18B, POTED, POTEH, ANKRD20A4P, POTEC, ANKRD30B, CCDC144A, ANKRD20A2P, ANKRD18A, ANKRD30BL, ANKRD7, ANKRD36C, ANKRD26, AC098850.3, POTEM, POTEG, POTEB2, ANKRD62, ANKRD20A1, ANKRD36B, AC136352.4, BX072566.1, POTEB3, ANKRD20A3P, FAM95C, POTEA, ASB5, ASB9, ASB11, TANC1, TANC2, ANKS1A, ANKS1B, NFKBIE, EHMT2, EHMT1, ASB15, ASB14, BCORL1, BCOR, ANKS4B, U…
PF13637	Ankyrin repeats (many copies)	7	6.75e-06	22.1412	0.0138368	OG0000478, OG0000567, OG0002362, OG0006086, OG0008248, OG0010235, OG0011197	ANK1, ANK3, ANK2, ANKRD52, ANKRD44, ANKRD28, TNKS, TNKS2, ANKFY1, ANKRD16, ANKRD42
PF00029	Connexin	5	8.03e-06	Inf	0.0138368	OG0000128, OG0000926, OG0002122, OG0006602, OG0010862	GJB6, GJB5, GJB4, GJB1, GJB3, GJB2, GJB7, GJC1, GJC2, GJD2, GJD4
