# Supplementary material for: The whale shark genome reveals patterns of vertebrate gene family evolution
Source: eLife. 2021 Aug 19;10:e65394. doi: 10.7554/eLife.65394 (PMC8455134; doi:10.7554/eLife.65394)
Supplement: Supplementary file 8. — n refers to the number of these gene families with that function gained. p.value refers to uncorrected p-values for Fisher’s exact test, adj.p refers to the adjusted p-value for multiple testing (see Materials and methods). See Supplementary file 19 for specific assignments of human gene names to each orthogroup. [file elife-65394-supp8.xlsx]

## Sheet: Sheet1
domain id	domain description	n	p	estimated odds.ratio	adj.p	orthogroups	human gene names
PF00001	7 transmembrane receptor (rhodopsin family)	34	3.23e-13	5.6399	2.27e-09	OG0000103, OG0000168, OG0000181, OG0000479, OG0000650, OG0001472, OG0001557, OG0001638, OG0001664, OG0001826, OG0001908, OG0001960, OG0002235, OG0002331, OG0002573, OG0002711, OG0002969, OG0003696, OG0004011, OG0004310, OG0005633, OG0007575, OG0007780, OG0007904, OG0008315, OG0009052, OG0009906, OG0010481, OG0010743, OG0011476, OG0012139, OG0012756, OG0014852, OG0018208	CCR2, CCR5, CCR1, XCR1, CCR8, CCR4, CX3CR1, ACKR2, CCR3, F2RL3, F2RL2, F2RL1, F2R, MC3R, MC4R, MC5R, MC2R, MC1R, FFAR2, FFAR1, FFAR3, GPR42, GPR65, GPR4, GPR68, TRHR, GPR85, GPR27, PTGER2, PTGIR, PTGDR, GPR37, GPR37L1, DRD3, DRD2, CYSLTR2, CYSLTR1, P2RY1, LPAR6, LPAR4, PTGER1, PTGFR, GPR26, GPR78, BDKRB1, BDKRB2, GPR83, GPR34, NPBWR1, NPBWR2, CXCR4, GPR146, GPR18, ACKR3, OXGR1, GPR176, GPR148, NP…
GO:0016021	integral component of membrane	71	2.64e-09	2.40371	9.27e-06	OG0000004, OG0000103, OG0000168, OG0000479, OG0000492, OG0000588, OG0000650, OG0000656, OG0000936, OG0001059, OG0001391, OG0001453, OG0001472, OG0001557, OG0001638, OG0001664, OG0001826, OG0001908, OG0001960, OG0002098, OG0002235, OG0002268, OG0002331, OG0002573, OG0002711, OG0002817, OG0002969, OG0003542, OG0003696, OG0003922, OG0004011, OG0004310, OG0004658, OG0004879, OG0005633, OG0007456, OG0…	OR51B5, OR52K1, OR52A5, OR52I2, OR52K2, OR52E4, OR51V1, OR52E2, OR51L1, OR51G2, OR52N2, OR52N1, OR52N5, OR52N4, OR52D1, OR52L1, OR51M1, OR52A1, OR52B6, OR51I2, OR51D1, OR52M1, OR52E6, OR51I1, OR51B6, OR51B4, OR52J3, OR51A2, OR51F1, OR51E2, OR51E1, OR52I1, OR52B2, OR52E8, OR52E1, OR52E5, OR52R1, OR51B2, OR52B4, OR51G1, CCR2, CCR5, CCR1, XCR1, CCR8, CCR4, CX3CR1, ACKR2, CCR3, F2RL3, F2RL2, F2RL1, F…
PF07686	Immunoglobulin V-set domain	9	1.65e-08	31.2007	3.85e-05	OG0001162, OG0001753, OG0003241, OG0004367, OG0004811, OG0006579, OG0009319, OG0010863, OG0014243	CXADR, CLMP, AC136352.5, SCN3B, SCN1B, SIGLEC15, HEPACAM, MXRA8, VSTM2L, SCN2B
PF01391	Collagen triple helix repeat (20 copies)	14	2.41e-08	9.29967	4.22e-05	OG0001408, OG0001971, OG0003316, OG0003349, OG0003947, OG0004089, OG0004578, OG0004744, OG0004785, OG0004923, OG0008036, OG0008695, OG0012951, OG0015390	COL23A1, COL13A1, COL25A1, C1QB, C1QC, C1QA, C1QTNF7, C1QTNF2, ADIPOQ, C1QTNF9, C1QTNF9B, COL7A1, COL14A1, COL6A2, COL12A1, EMILIN1, COL6A1, C1QTNF5, SCARA3
PF00100	Zona pellucida-like domain	7	1.47e-05	13.8276	0.0205739	OG0000407, OG0000458, OG0001540, OG0001842, OG0005017, OG0010090, OG0014060	ZP1, ZP4, ZP2, ZP3, ZPLD1, TECTA, TECTB
PF00096	Zinc finger, C2H2 type	27	2.48e-05	2.7483	0.024839	OG0001984, OG0002987, OG0003154, OG0003192, OG0003554, OG0004208, OG0004368, OG0004461, OG0004939, OG0006971, OG0007186, OG0007392, OG0007519, OG0007545, OG0007594, OG0008196, OG0009061, OG0009170, OG0009438, OG0010626, OG0011065, OG0011584, OG0011821, OG0011965, OG0012017, OG0013057, OG0014518	ZNF281, ZNF148, ZNF837, HIC1, HIC2, SP5, ZBTB16, SP3, ZXDA, ZXDB, ZXDC, GLIS2, ZBTB49, PRDM4, ZBTB40, ZBTB2, PRDM15, KLF3, ZBTB14, ZNF516, ZNF653, AC008481.3, ZBTB21, GLI4, ZNF672, SALL2, ZNF275, ZNF771, ZFP3
PF00092	von Willebrand factor type A domain	9	2.24e-05	7.79489	0.024839	OG0000383, OG0002543, OG0003947, OG0004089, OG0004578, OG0004744, OG0004923, OG0005486, OG0012771	ITGA1, ITGA2, ITGA10, ITGA11, VIT, COL7A1, COL14A1, COL6A2, COL12A1, COL6A1, VWA2
GO:0007186	G protein-coupled receptor signaling pathway	14	2.99e-05	4.33	0.0261991	OG0000004, OG0000492, OG0001638, OG0002083, OG0002946, OG0007389, OG0007904, OG0009052, OG0010743, OG0010869, OG0014051, OG0014753, OG0014852, OG0018208	OR51B5, OR52K1, OR52A5, OR52I2, OR52K2, OR52E4, OR51V1, OR52E2, OR51L1, OR51G2, OR52N2, OR52N1, OR52N5, OR52N4, OR52D1, OR52L1, OR51M1, OR52A1, OR52B6, OR51I2, OR51D1, OR52M1, OR52E6, OR51I1, OR51B6, OR51B4, OR52J3, OR51A2, OR51F1, OR51E2, OR51E1, OR52I1, OR52B2, OR52E8, OR52E1, OR52E5, OR52R1, OR51B2, OR52B4, OR51G1, ADGRF5, ADGRF2, ADGRF3, ADGRF4, ADGRF1, GPR85, GPR27, RGS9, RGS11, GNG11, GNGT1…
