# Supplementary material for: The whale shark genome reveals patterns of vertebrate gene family evolution
Source: eLife. 2021 Aug 19;10:e65394. doi: 10.7554/eLife.65394 (PMC8455134; doi:10.7554/eLife.65394)
Supplement: Supplementary file 9. — n refers to the number of these gene families with that function gained. p.value refers to uncorrected p-values for Fisher’s exact test, adj.p refers to the adjusted p-value for multiple testing (see Materials and methods). See Supplementary file 19 for specific assignments of human gene names to each orthogroup. [file elife-65394-supp9.xlsx]

## Sheet: Sheet1
domain id	domain description	n	p	estimate	adj.p	orthogroups	human gene names
				odds.ratio
PF07686	Immunoglobulin V-set domain	65	3.69e-31	18.4892	9.55e-28	OG0000002, OG0000006, OG0000013, OG0000021, OG0000063, OG0000080, OG0000087, OG0000686, OG0001164, OG0001304, OG0001378, OG0002194, OG0002715, OG0002882, OG0003641, OG0003774, OG0003966, OG0004153, OG0004170, OG0004171, OG0004548, OG0004595, OG0004620, OG0004813, OG0004900, OG0005006, OG0005524, OG0006062, OG0006725, OG0008000, OG0009114, OG0009269, OG0009334, OG0009420, OG0009442, OG0009915, OG0…	VPREB3, IGKV4-1, IGKV5-2, IGKV3-7, IGKV3-15, IGKV6-21, IGKV1D-33, IGKV2D-26, IGKV3D-20, IGKV6D-41, IGKV3D-11, IGLV4-69, IGLV8-61, IGLV4-60, IGLV6-57, IGLV11-55, IGLV5-52, IGLV1-51, IGLV1-50, IGLV5-48, IGLV1-47, IGLV7-46, IGLV5-45, IGLV1-44, IGLV7-43, IGLV1-40, IGLV5-37, IGLV1-36, IGLV2-33, IGLV3-32, IGLV3-27, IGLV3-25, IGLV2-23, IGLV3-22, IGLV3-21, IGLV3-19, IGLV2-14, IGLV2-11, IGLV3-9, IGLV4-3, …
PF07654	Immunoglobulin C1-set domain	16	2.25e-11	Inf	2.91e-08	OG0000019, OG0000091, OG0000143, OG0000284, OG0000319, OG0003641, OG0004153, OG0004171, OG0004412, OG0004971, OG0005377, OG0008912, OG0011212, OG0011236, OG0011551, OG0013594	HLA-F, AZGP1, HLA-B, MR1, HLA-E, HLA-A, HLA-G, HLA-C, HFE, IGLL1, IGKC, IGLC1, IGLC2, IGLC3, IGLC7, IGLJ1, IGLL5, HLA-DRB3, HLA-DQB2, HLA-DRB1, HLA-DQB1, HLA-DRB5, HLA-DPB1, HLA-DOB, HLA-DRB4, HLA-DOA, HLA-DQA2, HLA-DQA1, HLA-DPA1, HLA-DRA, AL662796.1, IGHA2, IGHE, IGHG4, IGHG2, IGHA1, IGHG1, IGHG3, IGHM, NCR3LG1, TAPBPL, B2M, TRBC2, TRBC1, TAPBP, TRGC1, TRGC2, TRDC
GO:0005576	extracellular region	52	1.68e-08	3.02418	1.45e-05	OG0000050, OG0000094, OG0000095, OG0000266, OG0001580, OG0001667, OG0002374, OG0002625, OG0002696, OG0002893, OG0003159, OG0003363, OG0003573, OG0003885, OG0004351, OG0004652, OG0004775, OG0005227, OG0006012, OG0006200, OG0006436, OG0006890, OG0007402, OG0008260, OG0008878, OG0009042, OG0009491, OG0009542, OG0009678, OG0009714, OG0009774, OG0010261, OG0010339, OG0010419, OG0010448, OG0010742, OG0…	CCL26, CCL22, CCL17, CCL24, CCL2, CCL13, CCL21, CCL11, CCL20, CCL7, CCL19, CCL8, CCL15, CCL3, CCL16, CCL4, CCL4L2, CCL18, CCL3L3, CCL3L1, CCL23, CCL15-CCL14, CCL14, CCL5, IFNA7, IFNA6, IFNA1, IFNK, IFNA8, IFNA2, IFNA16, IFNA10, IFNA14, IFNA21, IFNW1, IFNB1, IFNA17, IFNA4, IFNE, IFNA13, IFNA5, CXCL6, PF4V1, CXCL13, CXCL3, CXCL5, PPBP, PF4, CXCL10, CXCL8, CXCL11, CXCL9, CXCL1, CXCL2, APOL5, APOL1, …
GO:0006955	immune response	21	4.66e-08	7.64907	3.62e-05	OG0000050, OG0000095, OG0000143, OG0000284, OG0004652, OG0007971, OG0008878, OG0009542, OG0009678, OG0009774, OG0010261, OG0010536, OG0010695, OG0010721, OG0010722, OG0010742, OG0011002, OG0011242, OG0011317, OG0011472, OG0012322	CCL26, CCL22, CCL17, CCL24, CCL2, CCL13, CCL21, CCL11, CCL20, CCL7, CCL19, CCL8, CCL15, CCL3, CCL16, CCL4, CCL4L2, CCL18, CCL3L3, CCL3L1, CCL23, CCL15-CCL14, CCL14, CCL5, CXCL6, PF4V1, CXCL13, CXCL3, CXCL5, PPBP, PF4, CXCL10, CXCL8, CXCL11, CXCL9, CXCL1, CXCL2, HLA-DRB3, HLA-DQB2, HLA-DRB1, HLA-DQB1, HLA-DRB5, HLA-DPB1, HLA-DOB, HLA-DRB4, HLA-DOA, HLA-DQA2, HLA-DQA1, HLA-DPA1, HLA-DRA, AL662796.1…
GO:0005179	hormone activity	19	9.98e-07	6.28657	0.00070484	OG0001667, OG0002625, OG0002696, OG0003159, OG0003885, OG0005227, OG0006012, OG0006200, OG0006436, OG0007402, OG0008260, OG0009491, OG0009714, OG0009769, OG0010837, OG0010911, OG0011097, OG0013115, OG0013326	PRL, NPPC, SST, CRH, UCN, PTHLH, ADCYAP1, CCK, UCN3, EPO, ADM, IAPP, VIP, CGA, PRLH, LEP, GNRH1, MLN
GO:0008009	chemokine activity	8	4.78e-06	Inf	0.00247506	OG0000050, OG0000095, OG0004652, OG0009542, OG0009678, OG0009774, OG0011242, OG0012322	CCL26, CCL22, CCL17, CCL24, CCL2, CCL13, CCL21, CCL11, CCL20, CCL7, CCL19, CCL8, CCL15, CCL3, CCL16, CCL4, CCL4L2, CCL18, CCL3L3, CCL3L1, CCL23, CCL15-CCL14, CCL14, CCL5, CXCL6, PF4V1, CXCL13, CXCL3, CXCL5, PPBP, PF4, CXCL10, CXCL8, CXCL11, CXCL9, CXCL1, CXCL2, CXCL12, CCL25, CCL27, CCL28, CXCL14
PF00048	Small cytokines (intecrine/chemokine), interleukin-8 like	8	4.78e-06	Inf	0.00247506	OG0000050, OG0000095, OG0004652, OG0009542, OG0009678, OG0009757, OG0011242, OG0012322	CCL26, CCL22, CCL17, CCL24, CCL2, CCL13, CCL21, CCL11, CCL20, CCL7, CCL19, CCL8, CCL15, CCL3, CCL16, CCL4, CCL4L2, CCL18, CCL3L3, CCL3L1, CCL23, CCL15-CCL14, CCL14, CCL5, CXCL6, PF4V1, CXCL13, CXCL3, CXCL5, PPBP, PF4, CXCL10, CXCL8, CXCL11, CXCL9, CXCL1, CXCL2, CXCL12, CCL25, CCL27, CCL28
