# Supplementary material for: The whale shark genome reveals patterns of vertebrate gene family evolution
Source: eLife. 2021 Aug 19;10:e65394. doi: 10.7554/eLife.65394 (PMC8455134; doi:10.7554/eLife.65394)
Supplement: Supplementary file 10. — n refers to the number of these gene families with that function gained. p.value refers to uncorrected p-values for Fisher’s exact test, adj.p refers to the adjusted p-value for multiple testing (see Materials and methods). See Supplementary file 19 for specific assignments of human gene names to each orthogroup. [file elife-65394-supp10.xlsx]

## Sheet: Sheet1
domain id	domain description	n	p	estimate	adj.p	orthogroups	human gene names
				odds.ratio
PF00096	Zinc finger, C2H2 type	26	2.84e-08	3.98408	0.00011148	OG0000670, OG0003551, OG0010444, OG0010637, OG0010664, OG0010793, OG0010841, OG0010872, OG0011424, OG0011486, OG0011496, OG0011579, OG0011969, OG0012403, OG0012612, OG0012834, OG0013091, OG0013829, OG0014215, OG0014809, OG0014856, OG0015934, OG0016027, OG0016061, OG0016083, OG0017505	ZNF787, ZNF581, ZNF524, ZNF408, ZNF629, ZNF697, ZNF770, REPIN1, ZNF597, ZNF691, ZNF229
GO:0004930	G protein-coupled receptor activity	11	1.71e-06	7.27773	0.00334684	OG0000023, OG0000210, OG0000260, OG0003307, OG0013404, OG0013735, OG0014847, OG0015147, OG0015786, OG0018003, OG0018005	OR6M1, OR6S1, OR2AP1, OR6C2, OR6T1, OR6C76, OR6C70, OR6X1, OR6C74, OR6C6, OR6C65, OR6C75, OR6C3, OR6C1, OR6C4, OR6V1, OR6J1, OR6C68, OR13C9, OR13C4, OR13D1, OR13C8, OR13F1, OR2S2, OR2K2, OR13C5, OR13C3, OR13J1, OR13C2, MAS1, MRGPRX1, MRGPRF, MRGPRD, MRGPRX4, MRGPRG, MRGPRX2, MAS1L, MRGPRE, MRGPRX3
GO:0003676	nucleic acid binding	24	2.05e-05	2.83217	0.0222927	OG0003551, OG0010444, OG0010664, OG0010793, OG0011286, OG0011384, OG0011424, OG0011486, OG0011496, OG0011579, OG0012403, OG0012612, OG0012834, OG0013075, OG0013793, OG0014215, OG0014809, OG0016027, OG0016061, OG0016083, OG0016446, OG0017477, OG0017503, OG0017505	ZNF787, ZNF581, ZNF524, ZNF408, ZNF629, THAP9, ZBTB9, ZNF770, REPIN1, ZNF597, ZNF691, ZNF229
GO:0007186	G protein-coupled receptor signaling pathway	11	2.67e-05	5.23802	0.0222927	OG0000023, OG0000210, OG0000260, OG0003307, OG0013404, OG0013735, OG0014847, OG0015147, OG0015786, OG0018003, OG0018005	OR6M1, OR6S1, OR2AP1, OR6C2, OR6T1, OR6C76, OR6C70, OR6X1, OR6C74, OR6C6, OR6C65, OR6C75, OR6C3, OR6C1, OR6C4, OR6V1, OR6J1, OR6C68, OR13C9, OR13C4, OR13D1, OR13C8, OR13F1, OR2S2, OR2K2, OR13C5, OR13C3, OR13J1, OR13C2, MAS1, MRGPRX1, MRGPRF, MRGPRD, MRGPRX4, MRGPRG, MRGPRX2, MAS1L, MRGPRE, MRGPRX3
PF05699	hAT family C-terminal dimerisation region	4	5.48e-05	31.9513	0.0391	OG0012361, OG0012385, OG0013080, OG0013383
