# Supplementary material for: The whale shark genome reveals patterns of vertebrate gene family evolution
Source: eLife. 2021 Aug 19;10:e65394. doi: 10.7554/eLife.65394 (PMC8455134; doi:10.7554/eLife.65394)
Supplement: Supplementary file 11. — n refers to the number of these gene families with that function gained. p.value refers to uncorrected p-values for Fisher’s exact test, adj.p refers to the adjusted p-value for multiple testing (see Materials and methods). See Supplementary file 19 for specific assignments of human gene names to each orthogroup. [file elife-65394-supp11.xlsx]

## Sheet: Sheet1
domain id	domain description	n	p	estimate	adj.p	orthogroups	human gene names
				odds.ratio
PF00096	Zinc finger, C2H2 type	46	6.86e-28	10.6207	5.33e-24	OG0000225, OG0000956, OG0002249, OG0002987, OG0003779, OG0004959, OG0009283, OG0010416, OG0010626, OG0010851, OG0010982, OG0011022, OG0011065, OG0011067, OG0011222, OG0011453, OG0011584, OG0011599, OG0011742, OG0011821, OG0011865, OG0011944, OG0011965, OG0012017, OG0012140, OG0012762, OG0013057, OG0013171, OG0013175, OG0013220, OG0013514, OG0013893, OG0013896, OG0014096, OG0014287, OG0014339, OG0…	ZNF416, ZNF132, ZNF773, ZNF551, ZNF256, ZNF211, ZNF17, ZNF417, ZNF776, ZNF671, ZNF530, ZNF749, ZNF548, ZNF772, ZNF587, ZNF549, ZNF552, ZNF586, ZNF134, ZNF792, ZNF419, ZNF304, ZNF418, ZNF814, ZNF154, ZNF587B, AC004076.1, AC010522.1, AC003005.1, AC003006.1, AC003002.3, ZIK1, AC003002.1, ZNF777, ZNF212, ZNF746, ZNF783, ZNF398, ZNF282, NA, ZNF837, ZNF774, ZNF646, SNAI3, GLI4, ZNF672, ZNF32, ZFP69B, Z…
PF00059	Lectin C-type domain	10	8.12e-09	16.5126	3.15e-05	OG0000432, OG0001053, OG0001906, OG0003408, OG0012083, OG0012148, OG0012681, OG0013467, OG0013495, OG0014331	CD69, CLEC2B, CLEC2D, KLRG1, CLEC2L, CLEC2A, SFTPD, SFTPA2, MBL2, SFTPA1, REG1A, REG4, REG3G, REG1B, REG3A, KLRC4, KLRC1, KLRC2, KLRC3, AC068775.1, KLRC4-KLRK1, CLEC5A
PF13912	C2H2-type zinc finger	7	6.14e-06	12.6103	0.0156	OG0004959, OG0011065, OG0011453, OG0012762, OG0014096, OG0014359, OG0014947	ZNF646, SALL2
PF01352	KRAB box	4	8.03e-06	71.4512	0.0156	OG0000225, OG0000956, OG0011022, OG0011742	ZNF416, ZNF132, ZNF773, ZNF551, ZNF256, ZNF211, ZNF17, ZNF417, ZNF776, ZNF671, ZNF530, ZNF749, ZNF548, ZNF772, ZNF587, ZNF549, ZNF552, ZNF586, ZNF134, ZNF792, ZNF419, ZNF304, ZNF418, ZNF814, ZNF154, ZNF587B, AC004076.1, AC010522.1, AC003005.1, AC003006.1, AC003002.3, ZIK1, AC003002.1, ZNF777, ZNF212, ZNF746, ZNF783, ZNF398, ZNF282, ZFP69B, ZFP69, ZNF589, AL049650.2, ZNF343
