# Supplementary material for: The whale shark genome reveals patterns of vertebrate gene family evolution
Source: eLife. 2021 Aug 19;10:e65394. doi: 10.7554/eLife.65394 (PMC8455134; doi:10.7554/eLife.65394)
Supplement: Supplementary file 12. — Sequences that have identical or are isoforms of the same gene are indicated. TLR9 and TLR29 sequences that were not annotated are also indicated. [file elife-65394-supp12.xlsx]

## Sheet: Sheet1
TLRs
TLR1/6/10	XP_020390742.1
	XP_020390749.1 (identical)
TLR2/28	XP_020367827.1
	XP_020367828.1 (identical)
	XP_020379248.1
TLR3	XP_020375139.1
	XP_020375140.1 (identical)
TLR7	XP_020376237.1
TLR8	XP_020376247.1
TLR9	XP_020391373.1
	Another on: tig000316855
TLR21	XP_020378687.1
TLR22/23	XP_020374252.1
TLR27	XP_020384134.1
TLR29	XP_020388546.1
	Another on: tig000303350
RLRs, MAVS, and DICER
RIG-1	XP_020382456.1
MDA5	XP_020377384.1
	XP_020375939.1 (see text)
LGP2	XP_020377833.1
	XP_020377839.1 (identical)
MAVS	XP_020379351.1
DICER	XP_020385790.1
NLRs (*=detected NACHT domain)
NOD1	XP_020377166.1*
	XP_020377167.1*
	XP_020372421.1*
NOD2	XP_020371316.1*
	XP_020371320.1 (same gene)
	XP_020371321.1 (same gene)
NLRC3 (NOD3)	XP_020391377.1*
NLRC5 (NOD4)	XP_020383359.1*
	XP_020383358.1
	See also:
	XP_020370077.1
NLRX1 (NOD5) -like	XP_020372884.1
CIITA	XP_020392242.1*
	XP_020392245.1 (same gene)
NLRC4 (IPAF) -like	XP_020392928.1
NWD1-like	XP_020378861.1
	See also:
	XP_020381701.1
	XP_020391917.1
NAIP (BIRC1) -like	XP_020373169.1
	XP_020373170.1
“Fish-specific” FISNA domain containing NLR	XP_020386246.1*
	XP_020374464.1
	XP_020374622.1
NLRP	XP_020376766.1
Whale Shark lineage-specific expansion	XP_020379593.1*
	XP_020380299.1*
	XP_020370463.1*
	XP_020383553.1*
	XP_020383554.1*
	XP_020385964.1*
	XP_020392482.1*
	XP_020387670.1*
	STRGRTYPT.52674*
	XP_020380409.1*
	XP_020387523.1*
	XP_020373146.1*
	XP_020375477.1*
	XP_020391354.1*
	XP_020389366.1
	XP_020387859.1
	XP_020387858.1
TEP-1-like	XP_020381121.1
NB-ARC domain containing proteins	XP_020387052.1
(APAF-1)	XP_020390367.1
Other possible NLRs (unclear orthology/ novel lineages)	XP_020391906.1*
	XP_020391908.1 (same gene)
	XP_020391907.1
	XP_020367001.1*
	XP_020386151.1
	XP_020391062.1
	XP_020378394.1
	XP_020380031.1
