# Supplementary material for: The whale shark genome reveals patterns of vertebrate gene family evolution
Source: eLife. 2021 Aug 19;10:e65394. doi: 10.7554/eLife.65394 (PMC8455134; doi:10.7554/eLife.65394)
Supplement: Supplementary file 14. — n refers to the number of these gene families with that function gained. p.value refers to uncorrected p-values for Fisher’s exact test, adj.p refers to the adjusted p-value for multiple testing (see Materials and methods). See Supplementary file 19 for specific assignments of human gene names to each orthogroup. [file elife-65394-supp14.xlsx]

## Sheet: Sheet1
domain id	domain description	n	p	estimate	adj.p	orthogroups	human gene names
				odds.ratio
GO:0005840	ribosome	43	5.92e-15	5.87924	3.48e-11	OG0000627, OG0001253, OG0001296, OG0001778, OG0001872, OG0001911, OG0002023, OG0002040, OG0002382, OG0002504, OG0002728, OG0002888, OG0002896, OG0003081, OG0003102, OG0003220, OG0003345, OG0003528, OG0003538, OG0003738, OG0003748, OG0003757, OG0003881, OG0003893, OG0003939, OG0004038, OG0004135, OG0004191, OG0004254, OG0004270, OG0004348, OG0004738, OG0004764, OG0004820, OG0004891, OG0005109, OG0…	RPL23A, RPL17, RPL17-C18orf32, RPSA, RPL10L, RPL10, RPL22, RPL22L1, RPS27L, RPL31, RPL21, RPL9, RPS4Y1, RPS4X, RPS4Y2, RPL32, RPL26L1, AC135178.3, RPS15A, RPL36AL, RPL36A-HNRNPH2, RPL36A, RPS6, RPL12, RPS26, RPS24, RPS3A, FAU, RPL23, RPL37, RPL6, RPS23, RPS17, RPS2, RPS11, RPL29, RPL4, RPL36, RPS14, RPL35, RPL37A, RPS21, RPS13, RPS18, RPL39L, RPL39, RPS29, RPS28, MRPS18C, MRPL36
GO:0006412	translation	43	2.52e-14	5.53162	9.89e-11	OG0000627, OG0001253, OG0001296, OG0001778, OG0001872, OG0001911, OG0002023, OG0002040, OG0002382, OG0002504, OG0002728, OG0002888, OG0002896, OG0003081, OG0003102, OG0003220, OG0003345, OG0003528, OG0003538, OG0003738, OG0003748, OG0003757, OG0003881, OG0003893, OG0003939, OG0004038, OG0004135, OG0004191, OG0004254, OG0004270, OG0004348, OG0004738, OG0004764, OG0004820, OG0004891, OG0005109, OG0…	RPL23A, RPL17, RPL17-C18orf32, RPSA, RPL10L, RPL10, RPL22, RPL22L1, RPS27L, RPL31, RPL21, RPL9, RPS4Y1, RPS4X, RPS4Y2, RPL32, RPL26L1, AC135178.3, RPS15A, RPL36AL, RPL36A-HNRNPH2, RPL36A, RPS6, RPL12, RPS26, RPS24, RPS3A, FAU, RPL23, RPL37, RPL6, RPS23, RPS17, RPS2, RPS11, RPL29, RPL4, RPL36, RPS14, RPL35, RPL37A, RPS21, RPS13, RPS18, RPL39L, RPL39, RPS29, RPS28, MRPS18C, MRPL36
GO:0003735	structural constituent of ribosome	43	3.63e-13	4.94619	1.07e-09	OG0000627, OG0001253, OG0001296, OG0001778, OG0001872, OG0001911, OG0002023, OG0002040, OG0002382, OG0002504, OG0002728, OG0002888, OG0002896, OG0003081, OG0003102, OG0003220, OG0003345, OG0003528, OG0003538, OG0003738, OG0003748, OG0003757, OG0003881, OG0003893, OG0003939, OG0004038, OG0004135, OG0004191, OG0004254, OG0004270, OG0004348, OG0004738, OG0004764, OG0004820, OG0004891, OG0005109, OG0…	RPL23A, RPL17, RPL17-C18orf32, RPSA, RPL10L, RPL10, RPL22, RPL22L1, RPS27L, RPL31, RPL21, RPL9, RPS4Y1, RPS4X, RPS4Y2, RPL32, RPL26L1, AC135178.3, RPS15A, RPL36AL, RPL36A-HNRNPH2, RPL36A, RPS6, RPL12, RPS26, RPS24, RPS3A, FAU, RPL23, RPL37, RPL6, RPS23, RPS17, RPS2, RPS11, RPL29, RPL4, RPL36, RPS14, RPL35, RPL37A, RPS21, RPS13, RPS18, RPL39L, RPL39, RPS29, RPS28, MRPS18C, MRPL36
PF12775	P-loop containing dynein motor region	6	3.75e-05	38.4901	0.0401064	OG0000048, OG0000290, OG0000794, OG0003524, OG0011461, OG0016374	DNAH3, DNAH7, DNAH2, DNAH14, DNAH1, DNAH12, DNAH9, DNAH11, DNAH17, DNAH5, DNAH8, DNAH10
PF12777	Microtubule-binding stalk of dynein motor	6	3.75e-05	38.4901	0.0401064	OG0000048, OG0000290, OG0000794, OG0003483, OG0003524, OG0012835	DNAH3, DNAH7, DNAH2, DNAH14, DNAH1, DNAH12, DNAH9, DNAH11, DNAH17, DNAH5, DNAH8, DNAH10
PF12780	P-loop containing dynein motor region D4	6	3.75e-05	38.4901	0.0401064	OG0000048, OG0000290, OG0000794, OG0003483, OG0003524, OG0016374	DNAH3, DNAH7, DNAH2, DNAH14, DNAH1, DNAH12, DNAH9, DNAH11, DNAH17, DNAH5, DNAH8, DNAH10
PF12781	ATP-binding dynein motor region	6	3.75e-05	38.4901	0.0401064	OG0000048, OG0000290, OG0000794, OG0003483, OG0003524, OG0012287	DNAH3, DNAH7, DNAH2, DNAH14, DNAH1, DNAH12, DNAH9, DNAH11, DNAH17, DNAH5, DNAH8, DNAH10
PF17857	AAA+ lid domain	5	4.49e-05	Inf	0.0440507	OG0000290, OG0000794, OG0003524, OG0011461, OG0016374	DNAH9, DNAH11, DNAH17, DNAH5, DNAH8, DNAH10
