# Supplementary material for: The whale shark genome reveals patterns of vertebrate gene family evolution
Source: eLife. 2021 Aug 19;10:e65394. doi: 10.7554/eLife.65394 (PMC8455134; doi:10.7554/eLife.65394)
Supplement: Supplementary file 15. — Annotations are for the GCF_001642345.1 genome assembly (GFF). [file elife-65394-supp15.gff]

NW_018078261.1	genBlastG	transcript	3806	4251	64.5	-	.	ID=XP_007882578.1-R1-1-A1;Name=XP_007882578.1;PID=75.44;Coverage=84.21;Note=PID:75.44-Cover:84.21
NW_018078261.1	genBlastG	coding_exon	3902	4251	.	-	.	ID=XP_007882578.1-R1-1-A1-E1;Parent=XP_007882578.1-R1-1-A1
NW_018078261.1	genBlastG	coding_exon	3806	3890	.	-	.	ID=XP_007882578.1-R1-1-A1-E2;Parent=XP_007882578.1-R1-1-A1
NW_018084149.1	genBlastG	transcript	2741	3186	64.5	+	.	ID=XP_007882578.1-R1-2-A1;Name=XP_007882578.1;PID=75.44;Coverage=84.21;Note=PID:75.44-Cover:84.21
NW_018084149.1	genBlastG	coding_exon	2741	3090	.	+	.	ID=XP_007882578.1-R1-2-A1-E1;Parent=XP_007882578.1-R1-2-A1
NW_018084149.1	genBlastG	coding_exon	3102	3186	.	+	.	ID=XP_007882578.1-R1-2-A1-E2;Parent=XP_007882578.1-R1-2-A1
NW_018078469.1	genBlastG	transcript	494	939	64.5	+	.	ID=XP_007882578.1-R1-3-A1;Name=XP_007882578.1;PID=75.44;Coverage=84.21;Note=PID:75.44-Cover:84.21
NW_018078469.1	genBlastG	coding_exon	494	843	.	+	.	ID=XP_007882578.1-R1-3-A1-E1;Parent=XP_007882578.1-R1-3-A1
NW_018078469.1	genBlastG	coding_exon	855	939	.	+	.	ID=XP_007882578.1-R1-3-A1-E2;Parent=XP_007882578.1-R1-3-A1
NW_018060748.1	genBlastG	transcript	398	843	64.5	-	.	ID=XP_007882578.1-R1-4-A1;Name=XP_007882578.1;PID=75.44;Coverage=84.21;Note=PID:75.44-Cover:84.21
NW_018060748.1	genBlastG	coding_exon	494	843	.	-	.	ID=XP_007882578.1-R1-4-A1-E1;Parent=XP_007882578.1-R1-4-A1
NW_018060748.1	genBlastG	coding_exon	398	482	.	-	.	ID=XP_007882578.1-R1-4-A1-E2;Parent=XP_007882578.1-R1-4-A1
NW_018060814.1	genBlastG	transcript	6506	6951	64.5	-	.	ID=XP_007882578.1-R1-5-A1;Name=XP_007882578.1;PID=75.44;Coverage=84.21;Note=PID:75.44-Cover:84.21
NW_018060814.1	genBlastG	coding_exon	6602	6951	.	-	.	ID=XP_007882578.1-R1-5-A1-E1;Parent=XP_007882578.1-R1-5-A1
NW_018060814.1	genBlastG	coding_exon	6506	6590	.	-	.	ID=XP_007882578.1-R1-5-A1-E2;Parent=XP_007882578.1-R1-5-A1
NW_018054793.1	genBlastG	transcript	2896	3090	19.5	-	.	ID=XP_007882601.1-R1-1-A1;Name=XP_007882601.1;PID=27.44;Coverage=39.26;Note=PID:27.44-Cover:39.26
NW_018054793.1	genBlastG	coding_exon	2896	3090	.	-	.	ID=XP_007882601.1-R1-1-A1-E1;Parent=XP_007882601.1-R1-1-A1
NW_018049673.1	genBlastG	transcript	2456	2735	19	+	.	ID=XP_007882609.1-R1-1-A1;Name=XP_007882609.1;PID=13.91;Coverage=18.55;Note=PID:13.91-Cover:18.55
NW_018049673.1	genBlastG	coding_exon	2456	2492	.	+	.	ID=XP_007882609.1-R1-1-A1-E1;Parent=XP_007882609.1-R1-1-A1
NW_018049673.1	genBlastG	coding_exon	2539	2735	.	+	.	ID=XP_007882609.1-R1-1-A1-E2;Parent=XP_007882609.1-R1-1-A1
NW_018047236.1	genBlastG	transcript	29598	29976	15.03	-	.	ID=XP_007882688.1-R1-1-A1;Name=XP_007882688.1;PID=39.59;Coverage=62.3;Note=PID:39.59-Cover:62.3
NW_018047236.1	genBlastG	coding_exon	29678	29976	.	-	.	ID=XP_007882688.1-R1-1-A1-E1;Parent=XP_007882688.1-R1-1-A1
NW_018047236.1	genBlastG	coding_exon	29598	29658	.	-	.	ID=XP_007882688.1-R1-1-A1-E2;Parent=XP_007882688.1-R1-1-A1
NW_018037030.1	genBlastG	transcript	29889	87633	-21.3	-	.	ID=XP_007882706.1-R1-1-A1;Name=XP_007882706.1;PID=11.57;Coverage=15.11;Note=PID:11.57-Cover:15.11
NW_018037030.1	genBlastG	coding_exon	87496	87633	.	-	.	ID=XP_007882706.1-R1-1-A1-E1;Parent=XP_007882706.1-R1-1-A1
NW_018037030.1	genBlastG	coding_exon	66650	66748	.	-	.	ID=XP_007882706.1-R1-1-A1-E2;Parent=XP_007882706.1-R1-1-A1
NW_018037030.1	genBlastG	coding_exon	29889	30359	.	-	.	ID=XP_007882706.1-R1-1-A1-E3;Parent=XP_007882706.1-R1-1-A1
NW_018040133.1	genBlastG	transcript	19791	22052	17.25	-	.	ID=XP_007882711.1-R1-1-A1;Name=XP_007882711.1;PID=29.58;Coverage=69.66;Note=PID:29.58-Cover:69.66
NW_018040133.1	genBlastG	coding_exon	21908	22052	.	-	.	ID=XP_007882711.1-R1-1-A1-E1;Parent=XP_007882711.1-R1-1-A1
NW_018040133.1	genBlastG	coding_exon	20628	21064	.	-	.	ID=XP_007882711.1-R1-1-A1-E2;Parent=XP_007882711.1-R1-1-A1
NW_018040133.1	genBlastG	coding_exon	19791	20582	.	-	.	ID=XP_007882711.1-R1-1-A1-E3;Parent=XP_007882711.1-R1-1-A1
NW_018075629.1	genBlastG	transcript	6525	11708	56.3	+	.	ID=XP_007882714.1-R1-2-A1;Name=XP_007882714.1;PID=40.05;Coverage=91.07;Note=PID:40.05-Cover:91.07
NW_018075629.1	genBlastG	coding_exon	6525	6873	.	+	.	ID=XP_007882714.1-R1-2-A1-E1;Parent=XP_007882714.1-R1-2-A1
NW_018075629.1	genBlastG	coding_exon	7197	7396	.	+	.	ID=XP_007882714.1-R1-2-A1-E2;Parent=XP_007882714.1-R1-2-A1
NW_018075629.1	genBlastG	coding_exon	7527	7692	.	+	.	ID=XP_007882714.1-R1-2-A1-E3;Parent=XP_007882714.1-R1-2-A1
NW_018075629.1	genBlastG	coding_exon	11473	11708	.	+	.	ID=XP_007882714.1-R1-2-A1-E4;Parent=XP_007882714.1-R1-2-A1
NW_018072741.1	genBlastG	transcript	78706	79324	0.3602	+	.	ID=XP_007883025.1-R1-1-A1;Name=XP_007883025.1;PID=26.81;Coverage=40.51;Note=PID:26.81-Cover:40.51
NW_018072741.1	genBlastG	coding_exon	78706	78815	.	+	.	ID=XP_007883025.1-R1-1-A1-E1;Parent=XP_007883025.1-R1-1-A1
NW_018072741.1	genBlastG	coding_exon	79045	79120	.	+	.	ID=XP_007883025.1-R1-1-A1-E2;Parent=XP_007883025.1-R1-1-A1
NW_018072741.1	genBlastG	coding_exon	79175	79324	.	+	.	ID=XP_007883025.1-R1-1-A1-E3;Parent=XP_007883025.1-R1-1-A1
NW_018043648.1	genBlastG	transcript	12698	13057	40.8	-	.	ID=XP_007883135.1-R1-1-A1;Name=XP_007883135.1;PID=70.97;Coverage=100;Note=PID:70.97-Cover:100
NW_018043648.1	genBlastG	coding_exon	12698	13057	.	-	.	ID=XP_007883135.1-R1-1-A1-E1;Parent=XP_007883135.1-R1-1-A1
NW_018040996.1	genBlastG	transcript	77280	79250	-13.62	-	.	ID=XP_007883182.1-R1-1-A1;Name=XP_007883182.1;PID=23.76;Coverage=43.06;Note=PID:23.76-Cover:43.06
NW_018040996.1	genBlastG	coding_exon	79234	79250	.	-	.	ID=XP_007883182.1-R1-1-A1-E1;Parent=XP_007883182.1-R1-1-A1
NW_018040996.1	genBlastG	coding_exon	79160	79218	.	-	.	ID=XP_007883182.1-R1-1-A1-E2;Parent=XP_007883182.1-R1-1-A1
NW_018040996.1	genBlastG	coding_exon	78756	78872	.	-	.	ID=XP_007883182.1-R1-1-A1-E3;Parent=XP_007883182.1-R1-1-A1
NW_018040996.1	genBlastG	coding_exon	78576	78734	.	-	.	ID=XP_007883182.1-R1-1-A1-E4;Parent=XP_007883182.1-R1-1-A1
NW_018040996.1	genBlastG	coding_exon	78380	78554	.	-	.	ID=XP_007883182.1-R1-1-A1-E5;Parent=XP_007883182.1-R1-1-A1
NW_018040996.1	genBlastG	coding_exon	78271	78364	.	-	.	ID=XP_007883182.1-R1-1-A1-E6;Parent=XP_007883182.1-R1-1-A1
NW_018040996.1	genBlastG	coding_exon	77280	77582	.	-	.	ID=XP_007883182.1-R1-1-A1-E7;Parent=XP_007883182.1-R1-1-A1
NW_018065207.1	genBlastG	transcript	142827	150645	46.83	-	.	ID=XP_007883342.1-R1-1-A1;Name=XP_007883342.1;PID=54.84;Coverage=94.47;Note=PID:54.84-Cover:94.47
NW_018065207.1	genBlastG	coding_exon	150478	150645	.	-	.	ID=XP_007883342.1-R1-1-A1-E1;Parent=XP_007883342.1-R1-1-A1
NW_018065207.1	genBlastG	coding_exon	146439	146613	.	-	.	ID=XP_007883342.1-R1-1-A1-E2;Parent=XP_007883342.1-R1-1-A1
NW_018065207.1	genBlastG	coding_exon	142910	143080	.	-	.	ID=XP_007883342.1-R1-1-A1-E3;Parent=XP_007883342.1-R1-1-A1
NW_018065207.1	genBlastG	coding_exon	142827	142879	.	-	.	ID=XP_007883342.1-R1-1-A1-E4;Parent=XP_007883342.1-R1-1-A1
NW_018037016.1	genBlastG	transcript	25443	30767	79.8	+	.	ID=XP_007883529.1-R1-1-A1;Name=XP_007883529.1;PID=67.62;Coverage=93.66;Note=PID:67.62-Cover:93.66
NW_018037016.1	genBlastG	coding_exon	25443	25542	.	+	.	ID=XP_007883529.1-R1-1-A1-E1;Parent=XP_007883529.1-R1-1-A1
NW_018037016.1	genBlastG	coding_exon	26229	26358	.	+	.	ID=XP_007883529.1-R1-1-A1-E2;Parent=XP_007883529.1-R1-1-A1
NW_018037016.1	genBlastG	coding_exon	26899	27295	.	+	.	ID=XP_007883529.1-R1-1-A1-E3;Parent=XP_007883529.1-R1-1-A1
NW_018037016.1	genBlastG	coding_exon	30639	30767	.	+	.	ID=XP_007883529.1-R1-1-A1-E4;Parent=XP_007883529.1-R1-1-A1
NW_018048735.1	genBlastG	transcript	2830	3777	16.5	+	.	ID=XP_007883630.1-R1-1-A1;Name=XP_007883630.1;PID=14.92;Coverage=20.13;Note=PID:14.92-Cover:20.13
NW_018048735.1	genBlastG	coding_exon	2830	2923	.	+	.	ID=XP_007883630.1-R1-1-A1-E1;Parent=XP_007883630.1-R1-1-A1
NW_018048735.1	genBlastG	coding_exon	3599	3777	.	+	.	ID=XP_007883630.1-R1-1-A1-E2;Parent=XP_007883630.1-R1-1-A1
NW_018069384.1	genBlastG	transcript	188689	232013	32.54	+	.	ID=XP_007883821.1-R1-1-A1;Name=XP_007883821.1;PID=29.89;Coverage=70;Note=PID:29.89-Cover:70
NW_018069384.1	genBlastG	coding_exon	188689	188733	.	+	.	ID=XP_007883821.1-R1-1-A1-E1;Parent=XP_007883821.1-R1-1-A1
NW_018069384.1	genBlastG	coding_exon	188767	189082	.	+	.	ID=XP_007883821.1-R1-1-A1-E2;Parent=XP_007883821.1-R1-1-A1
NW_018069384.1	genBlastG	coding_exon	189113	189262	.	+	.	ID=XP_007883821.1-R1-1-A1-E3;Parent=XP_007883821.1-R1-1-A1
NW_018069384.1	genBlastG	coding_exon	229960	232013	.	+	.	ID=XP_007883821.1-R1-1-A1-E4;Parent=XP_007883821.1-R1-1-A1
NW_018083044.1	genBlastG	transcript	40985	42145	16.69	-	.	ID=XP_007883903.1-R1-1-A1;Name=XP_007883903.1;PID=22.98;Coverage=34.17;Note=PID:22.98-Cover:34.17
NW_018083044.1	genBlastG	coding_exon	42072	42145	.	-	.	ID=XP_007883903.1-R1-1-A1-E1;Parent=XP_007883903.1-R1-1-A1
NW_018083044.1	genBlastG	coding_exon	41080	41198	.	-	.	ID=XP_007883903.1-R1-1-A1-E2;Parent=XP_007883903.1-R1-1-A1
NW_018083044.1	genBlastG	coding_exon	40985	41040	.	-	.	ID=XP_007883903.1-R1-1-A1-E3;Parent=XP_007883903.1-R1-1-A1
NW_018061995.1	genBlastG	transcript	306623	307052	18.02	+	.	ID=XP_007883939.1-R1-1-A1;Name=XP_007883939.1;PID=41.6;Coverage=100;Note=PID:41.6-Cover:100
NW_018061995.1	genBlastG	coding_exon	306623	306628	.	+	.	ID=XP_007883939.1-R1-1-A1-E1;Parent=XP_007883939.1-R1-1-A1
NW_018061995.1	genBlastG	coding_exon	306684	306711	.	+	.	ID=XP_007883939.1-R1-1-A1-E2;Parent=XP_007883939.1-R1-1-A1
NW_018061995.1	genBlastG	coding_exon	306748	307052	.	+	.	ID=XP_007883939.1-R1-1-A1-E3;Parent=XP_007883939.1-R1-1-A1
NW_018036389.1	genBlastG	transcript	70398	71590	70.47	-	.	ID=XP_007883973.1-R1-1-A1;Name=XP_007883973.1;PID=53.75;Coverage=97.28;Note=PID:53.75-Cover:97.28
NW_018036389.1	genBlastG	coding_exon	71545	71590	.	-	.	ID=XP_007883973.1-R1-1-A1-E1;Parent=XP_007883973.1-R1-1-A1
NW_018036389.1	genBlastG	coding_exon	71259	71314	.	-	.	ID=XP_007883973.1-R1-1-A1-E2;Parent=XP_007883973.1-R1-1-A1
NW_018036389.1	genBlastG	coding_exon	71040	71177	.	-	.	ID=XP_007883973.1-R1-1-A1-E3;Parent=XP_007883973.1-R1-1-A1
NW_018036389.1	genBlastG	coding_exon	70398	71018	.	-	.	ID=XP_007883973.1-R1-1-A1-E4;Parent=XP_007883973.1-R1-1-A1
NW_018061796.1	genBlastG	transcript	568915	569886	21.41	-	.	ID=XP_007883978.1-R1-1-A1;Name=XP_007883978.1;PID=49.12;Coverage=90.65;Note=PID:49.12-Cover:90.65
NW_018061796.1	genBlastG	coding_exon	569840	569886	.	-	.	ID=XP_007883978.1-R1-1-A1-E1;Parent=XP_007883978.1-R1-1-A1
NW_018061796.1	genBlastG	coding_exon	569147	569185	.	-	.	ID=XP_007883978.1-R1-1-A1-E2;Parent=XP_007883978.1-R1-1-A1
NW_018061796.1	genBlastG	coding_exon	568915	569122	.	-	.	ID=XP_007883978.1-R1-1-A1-E3;Parent=XP_007883978.1-R1-1-A1
NW_018045712.1	genBlastG	transcript	15830	17993	61.44	+	.	ID=XP_007884220.1-R1-1-A1;Name=XP_007884220.1;PID=45.79;Coverage=97.48;Note=PID:45.79-Cover:97.48
NW_018045712.1	genBlastG	coding_exon	15830	16273	.	+	.	ID=XP_007884220.1-R1-1-A1-E1;Parent=XP_007884220.1-R1-1-A1
NW_018045712.1	genBlastG	coding_exon	16337	16420	.	+	.	ID=XP_007884220.1-R1-1-A1-E2;Parent=XP_007884220.1-R1-1-A1
NW_018045712.1	genBlastG	coding_exon	16547	16850	.	+	.	ID=XP_007884220.1-R1-1-A1-E3;Parent=XP_007884220.1-R1-1-A1
NW_018045712.1	genBlastG	coding_exon	16941	16960	.	+	.	ID=XP_007884220.1-R1-1-A1-E4;Parent=XP_007884220.1-R1-1-A1
NW_018045712.1	genBlastG	coding_exon	17030	17175	.	+	.	ID=XP_007884220.1-R1-1-A1-E5;Parent=XP_007884220.1-R1-1-A1
NW_018045712.1	genBlastG	coding_exon	17188	17225	.	+	.	ID=XP_007884220.1-R1-1-A1-E6;Parent=XP_007884220.1-R1-1-A1
NW_018045712.1	genBlastG	coding_exon	17983	17993	.	+	.	ID=XP_007884220.1-R1-1-A1-E7;Parent=XP_007884220.1-R1-1-A1
NW_018036677.1	genBlastG	transcript	90447	91499	28.24	+	.	ID=XP_007884295.1-R1-1-A1;Name=XP_007884295.1;PID=42.46;Coverage=100;Note=PID:42.46-Cover:100
NW_018036677.1	genBlastG	coding_exon	90447	90491	.	+	.	ID=XP_007884295.1-R1-1-A1-E1;Parent=XP_007884295.1-R1-1-A1
NW_018036677.1	genBlastG	coding_exon	90553	90642	.	+	.	ID=XP_007884295.1-R1-1-A1-E2;Parent=XP_007884295.1-R1-1-A1
NW_018036677.1	genBlastG	coding_exon	90670	90829	.	+	.	ID=XP_007884295.1-R1-1-A1-E3;Parent=XP_007884295.1-R1-1-A1
NW_018036677.1	genBlastG	coding_exon	90865	90941	.	+	.	ID=XP_007884295.1-R1-1-A1-E4;Parent=XP_007884295.1-R1-1-A1
NW_018036677.1	genBlastG	coding_exon	91371	91499	.	+	.	ID=XP_007884295.1-R1-1-A1-E5;Parent=XP_007884295.1-R1-1-A1
NW_018053852.1	genBlastG	transcript	8049	10082	17.5	+	.	ID=XP_007884303.1-R1-1-A1;Name=XP_007884303.1;PID=25.66;Coverage=95;Note=PID:25.66-Cover:95
NW_018053852.1	genBlastG	coding_exon	8049	8058	.	+	.	ID=XP_007884303.1-R1-1-A1-E1;Parent=XP_007884303.1-R1-1-A1
NW_018053852.1	genBlastG	coding_exon	8893	10082	.	+	.	ID=XP_007884303.1-R1-1-A1-E2;Parent=XP_007884303.1-R1-1-A1
NW_018051234.1	genBlastG	transcript	5961	7541	35.78	+	.	ID=XP_007884339.1-R1-1-A1;Name=XP_007884339.1;PID=32.85;Coverage=80.9;Note=PID:32.85-Cover:80.9
NW_018051234.1	genBlastG	coding_exon	5961	5999	.	+	.	ID=XP_007884339.1-R1-1-A1-E1;Parent=XP_007884339.1-R1-1-A1
NW_018051234.1	genBlastG	coding_exon	6015	6178	.	+	.	ID=XP_007884339.1-R1-1-A1-E2;Parent=XP_007884339.1-R1-1-A1
NW_018051234.1	genBlastG	coding_exon	6197	6255	.	+	.	ID=XP_007884339.1-R1-1-A1-E3;Parent=XP_007884339.1-R1-1-A1
NW_018051234.1	genBlastG	coding_exon	6295	6322	.	+	.	ID=XP_007884339.1-R1-1-A1-E4;Parent=XP_007884339.1-R1-1-A1
NW_018051234.1	genBlastG	coding_exon	6374	6495	.	+	.	ID=XP_007884339.1-R1-1-A1-E5;Parent=XP_007884339.1-R1-1-A1
NW_018051234.1	genBlastG	coding_exon	6529	6550	.	+	.	ID=XP_007884339.1-R1-1-A1-E6;Parent=XP_007884339.1-R1-1-A1
NW_018051234.1	genBlastG	coding_exon	7034	7055	.	+	.	ID=XP_007884339.1-R1-1-A1-E7;Parent=XP_007884339.1-R1-1-A1
NW_018051234.1	genBlastG	coding_exon	7080	7118	.	+	.	ID=XP_007884339.1-R1-1-A1-E8;Parent=XP_007884339.1-R1-1-A1
NW_018051234.1	genBlastG	coding_exon	7149	7252	.	+	.	ID=XP_007884339.1-R1-1-A1-E9;Parent=XP_007884339.1-R1-1-A1
NW_018051234.1	genBlastG	coding_exon	7295	7348	.	+	.	ID=XP_007884339.1-R1-1-A1-E10;Parent=XP_007884339.1-R1-1-A1
NW_018051234.1	genBlastG	coding_exon	7493	7541	.	+	.	ID=XP_007884339.1-R1-1-A1-E11;Parent=XP_007884339.1-R1-1-A1
NW_018052916.1	genBlastG	transcript	7257	14590	22.48	-	.	ID=XP_007884371.1-R1-1-A1;Name=XP_007884371.1;PID=47.22;Coverage=100;Note=PID:47.22-Cover:100
NW_018052916.1	genBlastG	coding_exon	14420	14590	.	-	.	ID=XP_007884371.1-R1-1-A1-E1;Parent=XP_007884371.1-R1-1-A1
NW_018052916.1	genBlastG	coding_exon	7257	7376	.	-	.	ID=XP_007884371.1-R1-1-A1-E2;Parent=XP_007884371.1-R1-1-A1
NW_018028929.1	genBlastG	transcript	3444	3807	22	+	.	ID=XP_007884385.1-R1-1-A1;Name=XP_007884385.1;PID=40.71;Coverage=74.59;Note=PID:40.71-Cover:74.59
NW_018028929.1	genBlastG	coding_exon	3444	3493	.	+	.	ID=XP_007884385.1-R1-1-A1-E1;Parent=XP_007884385.1-R1-1-A1
NW_018028929.1	genBlastG	coding_exon	3582	3807	.	+	.	ID=XP_007884385.1-R1-1-A1-E2;Parent=XP_007884385.1-R1-1-A1
NW_018074810.1	genBlastG	transcript	26228	28090	151.6	+	.	ID=XP_007884406.1-R1-1-A1;Name=XP_007884406.1;PID=40.31;Coverage=87.46;Note=PID:40.31-Cover:87.46
NW_018074810.1	genBlastG	coding_exon	26228	26239	.	+	.	ID=XP_007884406.1-R1-1-A1-E1;Parent=XP_007884406.1-R1-1-A1
NW_018074810.1	genBlastG	coding_exon	26321	26756	.	+	.	ID=XP_007884406.1-R1-1-A1-E2;Parent=XP_007884406.1-R1-1-A1
NW_018074810.1	genBlastG	coding_exon	27318	27482	.	+	.	ID=XP_007884406.1-R1-1-A1-E3;Parent=XP_007884406.1-R1-1-A1
NW_018074810.1	genBlastG	coding_exon	27669	27748	.	+	.	ID=XP_007884406.1-R1-1-A1-E4;Parent=XP_007884406.1-R1-1-A1
NW_018074810.1	genBlastG	coding_exon	28049	28090	.	+	.	ID=XP_007884406.1-R1-1-A1-E5;Parent=XP_007884406.1-R1-1-A1
NW_018037904.1	genBlastG	transcript	1950	4946	491.6	+	.	ID=XP_007884462.1-R1-1-A1;Name=XP_007884462.1;PID=19.5;Coverage=100;Note=PID:19.5-Cover:100
NW_018037904.1	genBlastG	coding_exon	1950	4946	.	+	.	ID=XP_007884462.1-R1-1-A1-E1;Parent=XP_007884462.1-R1-1-A1
NW_018039538.1	genBlastG	transcript	39734	46426	75.01	+	.	ID=XP_007884510.1-R1-1-A1;Name=XP_007884510.1;PID=46.91;Coverage=100;Note=PID:46.91-Cover:100
NW_018039538.1	genBlastG	coding_exon	39734	39769	.	+	.	ID=XP_007884510.1-R1-1-A1-E1;Parent=XP_007884510.1-R1-1-A1
NW_018039538.1	genBlastG	coding_exon	39844	39996	.	+	.	ID=XP_007884510.1-R1-1-A1-E2;Parent=XP_007884510.1-R1-1-A1
NW_018039538.1	genBlastG	coding_exon	45185	45379	.	+	.	ID=XP_007884510.1-R1-1-A1-E3;Parent=XP_007884510.1-R1-1-A1
NW_018039538.1	genBlastG	coding_exon	45416	45916	.	+	.	ID=XP_007884510.1-R1-1-A1-E4;Parent=XP_007884510.1-R1-1-A1
NW_018039538.1	genBlastG	coding_exon	45932	45968	.	+	.	ID=XP_007884510.1-R1-1-A1-E5;Parent=XP_007884510.1-R1-1-A1
NW_018039538.1	genBlastG	coding_exon	45993	46426	.	+	.	ID=XP_007884510.1-R1-1-A1-E6;Parent=XP_007884510.1-R1-1-A1
NW_018036112.1	genBlastG	transcript	5406	7764	62.4	-	.	ID=XP_007884520.1-R1-1-A1;Name=XP_007884520.1;PID=22.26;Coverage=100;Note=PID:22.26-Cover:100
NW_018036112.1	genBlastG	coding_exon	5406	7764	.	-	.	ID=XP_007884520.1-R1-1-A1-E1;Parent=XP_007884520.1-R1-1-A1
NW_018049320.1	genBlastG	transcript	15984	17236	78.75	-	.	ID=XP_007884557.1-R1-1-A1;Name=XP_007884557.1;PID=38.81;Coverage=84.74;Note=PID:38.81-Cover:84.74
NW_018049320.1	genBlastG	coding_exon	17198	17236	.	-	.	ID=XP_007884557.1-R1-1-A1-E1;Parent=XP_007884557.1-R1-1-A1
NW_018049320.1	genBlastG	coding_exon	17056	17177	.	-	.	ID=XP_007884557.1-R1-1-A1-E2;Parent=XP_007884557.1-R1-1-A1
NW_018049320.1	genBlastG	coding_exon	16701	17031	.	-	.	ID=XP_007884557.1-R1-1-A1-E3;Parent=XP_007884557.1-R1-1-A1
NW_018049320.1	genBlastG	coding_exon	16503	16652	.	-	.	ID=XP_007884557.1-R1-1-A1-E4;Parent=XP_007884557.1-R1-1-A1
NW_018049320.1	genBlastG	coding_exon	16372	16442	.	-	.	ID=XP_007884557.1-R1-1-A1-E5;Parent=XP_007884557.1-R1-1-A1
NW_018049320.1	genBlastG	coding_exon	15984	16356	.	-	.	ID=XP_007884557.1-R1-1-A1-E6;Parent=XP_007884557.1-R1-1-A1
NW_018056376.1	genBlastG	transcript	31822	33547	4.404	+	.	ID=XP_007884780.1-R1-1-A1;Name=XP_007884780.1;PID=32.57;Coverage=44.5;Note=PID:32.57-Cover:44.5
NW_018056376.1	genBlastG	coding_exon	31822	31891	.	+	.	ID=XP_007884780.1-R1-1-A1-E1;Parent=XP_007884780.1-R1-1-A1
NW_018056376.1	genBlastG	coding_exon	32561	32628	.	+	.	ID=XP_007884780.1-R1-1-A1-E2;Parent=XP_007884780.1-R1-1-A1
NW_018056376.1	genBlastG	coding_exon	32642	32724	.	+	.	ID=XP_007884780.1-R1-1-A1-E3;Parent=XP_007884780.1-R1-1-A1
NW_018056376.1	genBlastG	coding_exon	33475	33547	.	+	.	ID=XP_007884780.1-R1-1-A1-E4;Parent=XP_007884780.1-R1-1-A1
NW_018050698.1	genBlastG	transcript	1561	5883	155.1	+	.	ID=XP_007884866.1-R1-1-A1;Name=XP_007884866.1;PID=22.76;Coverage=35.41;Note=PID:22.76-Cover:35.41
NW_018050698.1	genBlastG	coding_exon	1561	1638	.	+	.	ID=XP_007884866.1-R1-1-A1-E1;Parent=XP_007884866.1-R1-1-A1
NW_018050698.1	genBlastG	coding_exon	5563	5628	.	+	.	ID=XP_007884866.1-R1-1-A1-E2;Parent=XP_007884866.1-R1-1-A1
NW_018050698.1	genBlastG	coding_exon	5752	5883	.	+	.	ID=XP_007884866.1-R1-1-A1-E3;Parent=XP_007884866.1-R1-1-A1
NW_018027616.1	genBlastG	transcript	193592	194740	24.5	-	.	ID=XP_007884949.1-R1-1-A1;Name=XP_007884949.1;PID=44.78;Coverage=100;Note=PID:44.78-Cover:100
NW_018027616.1	genBlastG	coding_exon	194735	194740	.	-	.	ID=XP_007884949.1-R1-1-A1-E1;Parent=XP_007884949.1-R1-1-A1
NW_018027616.1	genBlastG	coding_exon	194116	194438	.	-	.	ID=XP_007884949.1-R1-1-A1-E2;Parent=XP_007884949.1-R1-1-A1
NW_018027616.1	genBlastG	coding_exon	193592	193652	.	-	.	ID=XP_007884949.1-R1-1-A1-E3;Parent=XP_007884949.1-R1-1-A1
NW_018074006.1	genBlastG	transcript	85875	87296	19.5	-	.	ID=XP_007885012.1-R1-1-A1;Name=XP_007885012.1;PID=50.4;Coverage=100;Note=PID:50.4-Cover:100
NW_018074006.1	genBlastG	coding_exon	87183	87296	.	-	.	ID=XP_007885012.1-R1-1-A1-E1;Parent=XP_007885012.1-R1-1-A1
NW_018074006.1	genBlastG	coding_exon	86728	86925	.	-	.	ID=XP_007885012.1-R1-1-A1-E2;Parent=XP_007885012.1-R1-1-A1
NW_018074006.1	genBlastG	coding_exon	85875	85919	.	-	.	ID=XP_007885012.1-R1-1-A1-E3;Parent=XP_007885012.1-R1-1-A1
NW_018079315.1	genBlastG	transcript	9024	9581	65	+	.	ID=XP_007885126.1-R1-1-A1;Name=XP_007885126.1;PID=72.43;Coverage=100;Note=PID:72.43-Cover:100
NW_018079315.1	genBlastG	coding_exon	9024	9581	.	+	.	ID=XP_007885126.1-R1-1-A1-E1;Parent=XP_007885126.1-R1-1-A1
NW_018038947.1	genBlastG	transcript	29286	29510	13	-	.	ID=XP_007885141.1-R1-1-A1;Name=XP_007885141.1;PID=38.05;Coverage=69.81;Note=PID:38.05-Cover:69.81
NW_018038947.1	genBlastG	coding_exon	29286	29510	.	-	.	ID=XP_007885141.1-R1-1-A1-E1;Parent=XP_007885141.1-R1-1-A1
NW_018028453.1	genBlastG	transcript	2639	3583	8.993	+	.	ID=XP_007885299.1-R1-1-A1;Name=XP_007885299.1;PID=32.21;Coverage=50;Note=PID:32.21-Cover:50
NW_018028453.1	genBlastG	coding_exon	2639	2697	.	+	.	ID=XP_007885299.1-R1-1-A1-E1;Parent=XP_007885299.1-R1-1-A1
NW_018028453.1	genBlastG	coding_exon	3143	3343	.	+	.	ID=XP_007885299.1-R1-1-A1-E2;Parent=XP_007885299.1-R1-1-A1
NW_018028453.1	genBlastG	coding_exon	3460	3583	.	+	.	ID=XP_007885299.1-R1-1-A1-E3;Parent=XP_007885299.1-R1-1-A1
NW_018049603.1	genBlastG	transcript	2171	12176	-5.524	-	.	ID=XP_007885398.1-R1-1-A1;Name=XP_007885398.1;PID=23.46;Coverage=41.7;Note=PID:23.46-Cover:41.7
NW_018049603.1	genBlastG	coding_exon	12086	12176	.	-	.	ID=XP_007885398.1-R1-1-A1-E1;Parent=XP_007885398.1-R1-1-A1
NW_018049603.1	genBlastG	coding_exon	11340	11504	.	-	.	ID=XP_007885398.1-R1-1-A1-E2;Parent=XP_007885398.1-R1-1-A1
NW_018049603.1	genBlastG	coding_exon	3570	3767	.	-	.	ID=XP_007885398.1-R1-1-A1-E3;Parent=XP_007885398.1-R1-1-A1
NW_018049603.1	genBlastG	coding_exon	2348	2473	.	-	.	ID=XP_007885398.1-R1-1-A1-E4;Parent=XP_007885398.1-R1-1-A1
NW_018049603.1	genBlastG	coding_exon	2171	2271	.	-	.	ID=XP_007885398.1-R1-1-A1-E5;Parent=XP_007885398.1-R1-1-A1
NW_018035290.1	genBlastG	transcript	9273	10421	16	-	.	ID=XP_007885517.1-R1-1-A1;Name=XP_007885517.1;PID=47.15;Coverage=62.5;Note=PID:47.15-Cover:62.5
NW_018035290.1	genBlastG	coding_exon	10368	10421	.	-	.	ID=XP_007885517.1-R1-1-A1-E1;Parent=XP_007885517.1-R1-1-A1
NW_018035290.1	genBlastG	coding_exon	10084	10185	.	-	.	ID=XP_007885517.1-R1-1-A1-E2;Parent=XP_007885517.1-R1-1-A1
NW_018035290.1	genBlastG	coding_exon	9273	9344	.	-	.	ID=XP_007885517.1-R1-1-A1-E3;Parent=XP_007885517.1-R1-1-A1
NW_018030808.1	genBlastG	transcript	68810	75776	118.9	-	.	ID=XP_007885704.1-R1-1-A1;Name=XP_007885704.1;PID=50.3;Coverage=92.66;Note=PID:50.3-Cover:92.66
NW_018030808.1	genBlastG	coding_exon	75728	75776	.	-	.	ID=XP_007885704.1-R1-1-A1-E1;Parent=XP_007885704.1-R1-1-A1
NW_018030808.1	genBlastG	coding_exon	74842	74993	.	-	.	ID=XP_007885704.1-R1-1-A1-E2;Parent=XP_007885704.1-R1-1-A1
NW_018030808.1	genBlastG	coding_exon	70070	70366	.	-	.	ID=XP_007885704.1-R1-1-A1-E3;Parent=XP_007885704.1-R1-1-A1
NW_018030808.1	genBlastG	coding_exon	69424	69697	.	-	.	ID=XP_007885704.1-R1-1-A1-E4;Parent=XP_007885704.1-R1-1-A1
NW_018030808.1	genBlastG	coding_exon	68810	69363	.	-	.	ID=XP_007885704.1-R1-1-A1-E5;Parent=XP_007885704.1-R1-1-A1
NW_018066223.1	genBlastG	transcript	347791	404068	-68.04	+	.	ID=XP_007885716.1-R1-1-A1;Name=XP_007885716.1;PID=30.96;Coverage=42.56;Note=PID:30.96-Cover:42.56
NW_018066223.1	genBlastG	coding_exon	347791	348158	.	+	.	ID=XP_007885716.1-R1-1-A1-E1;Parent=XP_007885716.1-R1-1-A1
NW_018066223.1	genBlastG	coding_exon	359489	359612	.	+	.	ID=XP_007885716.1-R1-1-A1-E2;Parent=XP_007885716.1-R1-1-A1
NW_018066223.1	genBlastG	coding_exon	403850	404001	.	+	.	ID=XP_007885716.1-R1-1-A1-E3;Parent=XP_007885716.1-R1-1-A1
NW_018066223.1	genBlastG	coding_exon	404032	404068	.	+	.	ID=XP_007885716.1-R1-1-A1-E4;Parent=XP_007885716.1-R1-1-A1
NW_018039778.1	genBlastG	transcript	25696	27362	-0.3555	+	.	ID=XP_007885748.1-R1-1-A1;Name=XP_007885748.1;PID=24.19;Coverage=49.27;Note=PID:24.19-Cover:49.27
NW_018039778.1	genBlastG	coding_exon	25696	26919	.	+	.	ID=XP_007885748.1-R1-1-A1-E1;Parent=XP_007885748.1-R1-1-A1
NW_018039778.1	genBlastG	coding_exon	27171	27362	.	+	.	ID=XP_007885748.1-R1-1-A1-E2;Parent=XP_007885748.1-R1-1-A1
NW_018029268.1	genBlastG	transcript	136532	138832	27.38	+	.	ID=XP_007885808.1-R1-1-A1;Name=XP_007885808.1;PID=35.38;Coverage=69.31;Note=PID:35.38-Cover:69.31
NW_018029268.1	genBlastG	coding_exon	136532	136565	.	+	.	ID=XP_007885808.1-R1-1-A1-E1;Parent=XP_007885808.1-R1-1-A1
NW_018029268.1	genBlastG	coding_exon	136589	136765	.	+	.	ID=XP_007885808.1-R1-1-A1-E2;Parent=XP_007885808.1-R1-1-A1
NW_018029268.1	genBlastG	coding_exon	138079	138229	.	+	.	ID=XP_007885808.1-R1-1-A1-E3;Parent=XP_007885808.1-R1-1-A1
NW_018029268.1	genBlastG	coding_exon	138772	138832	.	+	.	ID=XP_007885808.1-R1-1-A1-E4;Parent=XP_007885808.1-R1-1-A1
NW_018029567.1	genBlastG	transcript	160339	167006	36.51	-	.	ID=XP_007885842.1-R1-1-A1;Name=XP_007885842.1;PID=64.23;Coverage=92.37;Note=PID:64.23-Cover:92.37
NW_018029567.1	genBlastG	coding_exon	166941	167006	.	-	.	ID=XP_007885842.1-R1-1-A1-E1;Parent=XP_007885842.1-R1-1-A1
NW_018029567.1	genBlastG	coding_exon	166189	166342	.	-	.	ID=XP_007885842.1-R1-1-A1-E2;Parent=XP_007885842.1-R1-1-A1
NW_018029567.1	genBlastG	coding_exon	160339	160448	.	-	.	ID=XP_007885842.1-R1-1-A1-E3;Parent=XP_007885842.1-R1-1-A1
NW_018053852.1	genBlastG	transcript	12573	15913	49.75	+	.	ID=XP_007886025.1-R1-1-A1;Name=XP_007886025.1;PID=37.43;Coverage=100;Note=PID:37.43-Cover:100
NW_018053852.1	genBlastG	coding_exon	12573	12670	.	+	.	ID=XP_007886025.1-R1-1-A1-E1;Parent=XP_007886025.1-R1-1-A1
NW_018053852.1	genBlastG	coding_exon	13569	13622	.	+	.	ID=XP_007886025.1-R1-1-A1-E2;Parent=XP_007886025.1-R1-1-A1
NW_018053852.1	genBlastG	coding_exon	13709	13741	.	+	.	ID=XP_007886025.1-R1-1-A1-E3;Parent=XP_007886025.1-R1-1-A1
NW_018053852.1	genBlastG	coding_exon	15166	15404	.	+	.	ID=XP_007886025.1-R1-1-A1-E4;Parent=XP_007886025.1-R1-1-A1
NW_018053852.1	genBlastG	coding_exon	15447	15913	.	+	.	ID=XP_007886025.1-R1-1-A1-E5;Parent=XP_007886025.1-R1-1-A1
NW_018039159.1	genBlastG	transcript	49321	58428	126.9	+	.	ID=XP_007886034.1-R1-1-A1;Name=XP_007886034.1;PID=64.49;Coverage=84.44;Note=PID:64.49-Cover:84.44
NW_018039159.1	genBlastG	coding_exon	49321	49500	.	+	.	ID=XP_007886034.1-R1-1-A1-E1;Parent=XP_007886034.1-R1-1-A1
NW_018039159.1	genBlastG	coding_exon	57580	58428	.	+	.	ID=XP_007886034.1-R1-1-A1-E2;Parent=XP_007886034.1-R1-1-A1
NW_018030243.1	genBlastG	transcript	204678	205256	23.5	-	.	ID=XP_007886039.1-R1-1-A1;Name=XP_007886039.1;PID=50;Coverage=88.78;Note=PID:50-Cover:88.78
NW_018030243.1	genBlastG	coding_exon	205112	205256	.	-	.	ID=XP_007886039.1-R1-1-A1-E1;Parent=XP_007886039.1-R1-1-A1
NW_018030243.1	genBlastG	coding_exon	204678	204796	.	-	.	ID=XP_007886039.1-R1-1-A1-E2;Parent=XP_007886039.1-R1-1-A1
NW_018028354.1	genBlastG	transcript	30021	30421	12	-	.	ID=XP_007886449.1-R1-1-A1;Name=XP_007886449.1;PID=55.17;Coverage=91.07;Note=PID:55.17-Cover:91.07
NW_018028354.1	genBlastG	coding_exon	30301	30421	.	-	.	ID=XP_007886449.1-R1-1-A1-E1;Parent=XP_007886449.1-R1-1-A1
NW_018028354.1	genBlastG	coding_exon	30021	30055	.	-	.	ID=XP_007886449.1-R1-1-A1-E2;Parent=XP_007886449.1-R1-1-A1
NW_018028628.1	genBlastG	transcript	77809	85824	55.05	-	.	ID=XP_007886476.1-R1-1-A1;Name=XP_007886476.1;PID=45.51;Coverage=74.65;Note=PID:45.51-Cover:74.65
NW_018028628.1	genBlastG	coding_exon	85768	85824	.	-	.	ID=XP_007886476.1-R1-1-A1-E1;Parent=XP_007886476.1-R1-1-A1
NW_018028628.1	genBlastG	coding_exon	84859	85103	.	-	.	ID=XP_007886476.1-R1-1-A1-E2;Parent=XP_007886476.1-R1-1-A1
NW_018028628.1	genBlastG	coding_exon	80349	80374	.	-	.	ID=XP_007886476.1-R1-1-A1-E3;Parent=XP_007886476.1-R1-1-A1
NW_018028628.1	genBlastG	coding_exon	78280	78660	.	-	.	ID=XP_007886476.1-R1-1-A1-E4;Parent=XP_007886476.1-R1-1-A1
NW_018028628.1	genBlastG	coding_exon	78061	78251	.	-	.	ID=XP_007886476.1-R1-1-A1-E5;Parent=XP_007886476.1-R1-1-A1
NW_018028628.1	genBlastG	coding_exon	77809	77883	.	-	.	ID=XP_007886476.1-R1-1-A1-E6;Parent=XP_007886476.1-R1-1-A1
NW_018046094.1	genBlastG	transcript	5266	22916	30.19	+	.	ID=XP_007886958.1-R1-1-A1;Name=XP_007886958.1;PID=39.24;Coverage=59.58;Note=PID:39.24-Cover:59.58
NW_018046094.1	genBlastG	coding_exon	5266	5318	.	+	.	ID=XP_007886958.1-R1-1-A1-E1;Parent=XP_007886958.1-R1-1-A1
NW_018046094.1	genBlastG	coding_exon	6196	6307	.	+	.	ID=XP_007886958.1-R1-1-A1-E2;Parent=XP_007886958.1-R1-1-A1
NW_018046094.1	genBlastG	coding_exon	6324	6353	.	+	.	ID=XP_007886958.1-R1-1-A1-E3;Parent=XP_007886958.1-R1-1-A1
NW_018046094.1	genBlastG	coding_exon	9059	9196	.	+	.	ID=XP_007886958.1-R1-1-A1-E4;Parent=XP_007886958.1-R1-1-A1
NW_018046094.1	genBlastG	coding_exon	20331	20480	.	+	.	ID=XP_007886958.1-R1-1-A1-E5;Parent=XP_007886958.1-R1-1-A1
NW_018046094.1	genBlastG	coding_exon	21883	22079	.	+	.	ID=XP_007886958.1-R1-1-A1-E6;Parent=XP_007886958.1-R1-1-A1
NW_018046094.1	genBlastG	coding_exon	22829	22916	.	+	.	ID=XP_007886958.1-R1-1-A1-E7;Parent=XP_007886958.1-R1-1-A1
NW_018040874.1	genBlastG	transcript	2852	3237	15.53	+	.	ID=XP_007887448.1-R1-1-A1;Name=XP_007887448.1;PID=35.64;Coverage=90.28;Note=PID:35.64-Cover:90.28
NW_018040874.1	genBlastG	coding_exon	2852	2863	.	+	.	ID=XP_007887448.1-R1-1-A1-E1;Parent=XP_007887448.1-R1-1-A1
NW_018040874.1	genBlastG	coding_exon	3052	3237	.	+	.	ID=XP_007887448.1-R1-1-A1-E2;Parent=XP_007887448.1-R1-1-A1
NW_018068242.1	genBlastG	transcript	111612	120040	67.77	+	.	ID=XP_007887577.1-R1-1-A1;Name=XP_007887577.1;PID=47.15;Coverage=95.52;Note=PID:47.15-Cover:95.52
NW_018068242.1	genBlastG	coding_exon	111612	111830	.	+	.	ID=XP_007887577.1-R1-1-A1-E1;Parent=XP_007887577.1-R1-1-A1
NW_018068242.1	genBlastG	coding_exon	112664	112787	.	+	.	ID=XP_007887577.1-R1-1-A1-E2;Parent=XP_007887577.1-R1-1-A1
NW_018068242.1	genBlastG	coding_exon	113794	113937	.	+	.	ID=XP_007887577.1-R1-1-A1-E3;Parent=XP_007887577.1-R1-1-A1
NW_018068242.1	genBlastG	coding_exon	116963	117108	.	+	.	ID=XP_007887577.1-R1-1-A1-E4;Parent=XP_007887577.1-R1-1-A1
NW_018068242.1	genBlastG	coding_exon	119862	119933	.	+	.	ID=XP_007887577.1-R1-1-A1-E5;Parent=XP_007887577.1-R1-1-A1
NW_018068242.1	genBlastG	coding_exon	119975	120040	.	+	.	ID=XP_007887577.1-R1-1-A1-E6;Parent=XP_007887577.1-R1-1-A1
NW_018068242.1	genBlastG	transcript	137955	151377	33	-	.	ID=XP_007887581.1-R1-1-A1;Name=XP_007887581.1;PID=49.46;Coverage=97.04;Note=PID:49.46-Cover:97.04
NW_018068242.1	genBlastG	coding_exon	151251	151377	.	-	.	ID=XP_007887581.1-R1-1-A1-E1;Parent=XP_007887581.1-R1-1-A1
NW_018068242.1	genBlastG	coding_exon	147233	147356	.	-	.	ID=XP_007887581.1-R1-1-A1-E2;Parent=XP_007887581.1-R1-1-A1
NW_018068242.1	genBlastG	coding_exon	137955	138198	.	-	.	ID=XP_007887581.1-R1-1-A1-E3;Parent=XP_007887581.1-R1-1-A1
NW_018029533.1	genBlastG	transcript	269690	283207	1151	+	.	ID=XP_007887761.1-R1-1-A1;Name=XP_007887761.1;PID=52.85;Coverage=98.04;Note=PID:52.85-Cover:98.04
NW_018029533.1	genBlastG	coding_exon	269690	269844	.	+	.	ID=XP_007887761.1-R1-1-A1-E1;Parent=XP_007887761.1-R1-1-A1
NW_018029533.1	genBlastG	coding_exon	269870	270030	.	+	.	ID=XP_007887761.1-R1-1-A1-E2;Parent=XP_007887761.1-R1-1-A1
NW_018029533.1	genBlastG	coding_exon	270093	271002	.	+	.	ID=XP_007887761.1-R1-1-A1-E3;Parent=XP_007887761.1-R1-1-A1
NW_018029533.1	genBlastG	coding_exon	271099	273498	.	+	.	ID=XP_007887761.1-R1-1-A1-E4;Parent=XP_007887761.1-R1-1-A1
NW_018029533.1	genBlastG	coding_exon	273580	275591	.	+	.	ID=XP_007887761.1-R1-1-A1-E5;Parent=XP_007887761.1-R1-1-A1
NW_018029533.1	genBlastG	coding_exon	275613	276529	.	+	.	ID=XP_007887761.1-R1-1-A1-E6;Parent=XP_007887761.1-R1-1-A1
NW_018029533.1	genBlastG	coding_exon	276560	276631	.	+	.	ID=XP_007887761.1-R1-1-A1-E7;Parent=XP_007887761.1-R1-1-A1
NW_018029533.1	genBlastG	coding_exon	276650	276729	.	+	.	ID=XP_007887761.1-R1-1-A1-E8;Parent=XP_007887761.1-R1-1-A1
NW_018029533.1	genBlastG	coding_exon	276742	277689	.	+	.	ID=XP_007887761.1-R1-1-A1-E9;Parent=XP_007887761.1-R1-1-A1
NW_018029533.1	genBlastG	coding_exon	277741	279395	.	+	.	ID=XP_007887761.1-R1-1-A1-E10;Parent=XP_007887761.1-R1-1-A1
NW_018029533.1	genBlastG	coding_exon	279450	280359	.	+	.	ID=XP_007887761.1-R1-1-A1-E11;Parent=XP_007887761.1-R1-1-A1
NW_018029533.1	genBlastG	coding_exon	280375	283207	.	+	.	ID=XP_007887761.1-R1-1-A1-E12;Parent=XP_007887761.1-R1-1-A1
NW_018063403.1	genBlastG	transcript	115120	115572	15.83	-	.	ID=XP_007887768.1-R1-1-A1;Name=XP_007887768.1;PID=17.76;Coverage=26.24;Note=PID:17.76-Cover:26.24
NW_018063403.1	genBlastG	coding_exon	115450	115572	.	-	.	ID=XP_007887768.1-R1-1-A1-E1;Parent=XP_007887768.1-R1-1-A1
NW_018063403.1	genBlastG	coding_exon	115120	115332	.	-	.	ID=XP_007887768.1-R1-1-A1-E2;Parent=XP_007887768.1-R1-1-A1
NW_018057510.1	genBlastG	transcript	955	6734	70.27	+	.	ID=XP_007887870.1-R1-1-A1;Name=XP_007887870.1;PID=79.26;Coverage=97.24;Note=PID:79.26-Cover:97.24
NW_018057510.1	genBlastG	coding_exon	955	962	.	+	.	ID=XP_007887870.1-R1-1-A1-E1;Parent=XP_007887870.1-R1-1-A1
NW_018057510.1	genBlastG	coding_exon	1651	1810	.	+	.	ID=XP_007887870.1-R1-1-A1-E2;Parent=XP_007887870.1-R1-1-A1
NW_018057510.1	genBlastG	coding_exon	5767	5905	.	+	.	ID=XP_007887870.1-R1-1-A1-E3;Parent=XP_007887870.1-R1-1-A1
NW_018057510.1	genBlastG	coding_exon	6511	6734	.	+	.	ID=XP_007887870.1-R1-1-A1-E4;Parent=XP_007887870.1-R1-1-A1
NW_018030825.1	genBlastG	transcript	101228	153710	42.8	+	.	ID=XP_007887885.1-R1-1-A1;Name=XP_007887885.1;PID=42.44;Coverage=72.53;Note=PID:42.44-Cover:72.53
NW_018030825.1	genBlastG	coding_exon	101228	101467	.	+	.	ID=XP_007887885.1-R1-1-A1-E1;Parent=XP_007887885.1-R1-1-A1
NW_018030825.1	genBlastG	coding_exon	121059	121240	.	+	.	ID=XP_007887885.1-R1-1-A1-E2;Parent=XP_007887885.1-R1-1-A1
NW_018030825.1	genBlastG	coding_exon	152601	152861	.	+	.	ID=XP_007887885.1-R1-1-A1-E3;Parent=XP_007887885.1-R1-1-A1
NW_018030825.1	genBlastG	coding_exon	153686	153710	.	+	.	ID=XP_007887885.1-R1-1-A1-E4;Parent=XP_007887885.1-R1-1-A1
NW_018051957.1	genBlastG	transcript	427	936	16	+	.	ID=XP_007887901.1-R1-1-A1;Name=XP_007887901.1;PID=28.37;Coverage=38.3;Note=PID:28.37-Cover:38.3
NW_018051957.1	genBlastG	coding_exon	427	468	.	+	.	ID=XP_007887901.1-R1-1-A1-E1;Parent=XP_007887901.1-R1-1-A1
NW_018051957.1	genBlastG	coding_exon	527	727	.	+	.	ID=XP_007887901.1-R1-1-A1-E2;Parent=XP_007887901.1-R1-1-A1
NW_018051957.1	genBlastG	coding_exon	853	936	.	+	.	ID=XP_007887901.1-R1-1-A1-E3;Parent=XP_007887901.1-R1-1-A1
NW_018080695.1	genBlastG	transcript	2474	3284	-3.476	-	.	ID=XP_007887950.1-R1-1-A1;Name=XP_007887950.1;PID=36.6;Coverage=71.31;Note=PID:36.6-Cover:71.31
NW_018080695.1	genBlastG	coding_exon	3186	3284	.	-	.	ID=XP_007887950.1-R1-1-A1-E1;Parent=XP_007887950.1-R1-1-A1
NW_018080695.1	genBlastG	coding_exon	2474	3130	.	-	.	ID=XP_007887950.1-R1-1-A1-E2;Parent=XP_007887950.1-R1-1-A1
NW_018035142.1	genBlastG	transcript	131344	143707	114	-	.	ID=XP_007887973.1-R1-1-A1;Name=XP_007887973.1;PID=36.06;Coverage=77.2;Note=PID:36.06-Cover:77.2
NW_018035142.1	genBlastG	coding_exon	143620	143707	.	-	.	ID=XP_007887973.1-R1-1-A1-E1;Parent=XP_007887973.1-R1-1-A1
NW_018035142.1	genBlastG	coding_exon	142886	143545	.	-	.	ID=XP_007887973.1-R1-1-A1-E2;Parent=XP_007887973.1-R1-1-A1
NW_018035142.1	genBlastG	coding_exon	138737	139479	.	-	.	ID=XP_007887973.1-R1-1-A1-E3;Parent=XP_007887973.1-R1-1-A1
NW_018035142.1	genBlastG	coding_exon	131344	131643	.	-	.	ID=XP_007887973.1-R1-1-A1-E4;Parent=XP_007887973.1-R1-1-A1
NW_018028803.1	genBlastG	transcript	102962	114872	201.1	-	.	ID=XP_007887995.1-R1-1-A1;Name=XP_007887995.1;PID=40.56;Coverage=76.94;Note=PID:40.56-Cover:76.94
NW_018028803.1	genBlastG	coding_exon	114861	114872	.	-	.	ID=XP_007887995.1-R1-1-A1-E1;Parent=XP_007887995.1-R1-1-A1
NW_018028803.1	genBlastG	coding_exon	114711	114845	.	-	.	ID=XP_007887995.1-R1-1-A1-E2;Parent=XP_007887995.1-R1-1-A1
NW_018028803.1	genBlastG	coding_exon	114252	114272	.	-	.	ID=XP_007887995.1-R1-1-A1-E3;Parent=XP_007887995.1-R1-1-A1
NW_018028803.1	genBlastG	coding_exon	113540	114215	.	-	.	ID=XP_007887995.1-R1-1-A1-E4;Parent=XP_007887995.1-R1-1-A1
NW_018028803.1	genBlastG	coding_exon	110398	113006	.	-	.	ID=XP_007887995.1-R1-1-A1-E5;Parent=XP_007887995.1-R1-1-A1
NW_018028803.1	genBlastG	coding_exon	103542	103775	.	-	.	ID=XP_007887995.1-R1-1-A1-E6;Parent=XP_007887995.1-R1-1-A1
NW_018028803.1	genBlastG	coding_exon	102962	103060	.	-	.	ID=XP_007887995.1-R1-1-A1-E7;Parent=XP_007887995.1-R1-1-A1
NW_018036344.1	genBlastG	transcript	92721	95390	45.86	-	.	ID=XP_007887996.1-R1-1-A1;Name=XP_007887996.1;PID=52.16;Coverage=98.1;Note=PID:52.16-Cover:98.1
NW_018036344.1	genBlastG	coding_exon	95153	95390	.	-	.	ID=XP_007887996.1-R1-1-A1-E1;Parent=XP_007887996.1-R1-1-A1
NW_018036344.1	genBlastG	coding_exon	93751	94011	.	-	.	ID=XP_007887996.1-R1-1-A1-E2;Parent=XP_007887996.1-R1-1-A1
NW_018036344.1	genBlastG	coding_exon	93702	93729	.	-	.	ID=XP_007887996.1-R1-1-A1-E3;Parent=XP_007887996.1-R1-1-A1
NW_018036344.1	genBlastG	coding_exon	92721	92814	.	-	.	ID=XP_007887996.1-R1-1-A1-E4;Parent=XP_007887996.1-R1-1-A1
NW_018036434.1	genBlastG	transcript	59579	60169	64.33	-	.	ID=XP_007888000.1-R1-1-A1;Name=XP_007888000.1;PID=61.8;Coverage=89.09;Note=PID:61.8-Cover:89.09
NW_018036434.1	genBlastG	coding_exon	59579	60169	.	-	.	ID=XP_007888000.1-R1-1-A1-E1;Parent=XP_007888000.1-R1-1-A1
NW_018036434.1	genBlastG	transcript	72597	73187	64.33	-	.	ID=XP_007888000.1-R1-2-A1;Name=XP_007888000.1;PID=61.8;Coverage=89.09;Note=PID:61.8-Cover:89.09
NW_018036434.1	genBlastG	coding_exon	72597	73187	.	-	.	ID=XP_007888000.1-R1-2-A1-E1;Parent=XP_007888000.1-R1-2-A1
NW_018040083.1	genBlastG	transcript	2125	2789	19.71	-	.	ID=XP_007888102.1-R1-1-A1;Name=XP_007888102.1;PID=24.69;Coverage=38.92;Note=PID:24.69-Cover:38.92
NW_018040083.1	genBlastG	coding_exon	2591	2789	.	-	.	ID=XP_007888102.1-R1-1-A1-E1;Parent=XP_007888102.1-R1-1-A1
NW_018040083.1	genBlastG	coding_exon	2125	2297	.	-	.	ID=XP_007888102.1-R1-1-A1-E2;Parent=XP_007888102.1-R1-1-A1
NW_018081128.1	genBlastG	transcript	12383	37952	17.64	-	.	ID=XP_007888130.1-R1-1-A1;Name=XP_007888130.1;PID=47.58;Coverage=84.82;Note=PID:47.58-Cover:84.82
NW_018081128.1	genBlastG	coding_exon	37881	37952	.	-	.	ID=XP_007888130.1-R1-1-A1-E1;Parent=XP_007888130.1-R1-1-A1
NW_018081128.1	genBlastG	coding_exon	37661	37825	.	-	.	ID=XP_007888130.1-R1-1-A1-E2;Parent=XP_007888130.1-R1-1-A1
NW_018081128.1	genBlastG	coding_exon	22868	22942	.	-	.	ID=XP_007888130.1-R1-1-A1-E3;Parent=XP_007888130.1-R1-1-A1
NW_018081128.1	genBlastG	coding_exon	22676	22732	.	-	.	ID=XP_007888130.1-R1-1-A1-E4;Parent=XP_007888130.1-R1-1-A1
NW_018081128.1	genBlastG	coding_exon	22619	22657	.	-	.	ID=XP_007888130.1-R1-1-A1-E5;Parent=XP_007888130.1-R1-1-A1
NW_018081128.1	genBlastG	coding_exon	12606	12755	.	-	.	ID=XP_007888130.1-R1-1-A1-E6;Parent=XP_007888130.1-R1-1-A1
NW_018081128.1	genBlastG	coding_exon	12383	12481	.	-	.	ID=XP_007888130.1-R1-1-A1-E7;Parent=XP_007888130.1-R1-1-A1
NW_018043523.1	genBlastG	transcript	37119	37388	24.05	+	.	ID=XP_007888341.1-R1-1-A1;Name=XP_007888341.1;PID=61.8;Coverage=90.48;Note=PID:61.8-Cover:90.48
NW_018043523.1	genBlastG	coding_exon	37119	37169	.	+	.	ID=XP_007888341.1-R1-1-A1-E1;Parent=XP_007888341.1-R1-1-A1
NW_018043523.1	genBlastG	coding_exon	37209	37388	.	+	.	ID=XP_007888341.1-R1-1-A1-E2;Parent=XP_007888341.1-R1-1-A1
NW_018078505.1	genBlastG	transcript	67203	70213	66.96	-	.	ID=XP_007888490.1-R1-1-A1;Name=XP_007888490.1;PID=48.91;Coverage=93.86;Note=PID:48.91-Cover:93.86
NW_018078505.1	genBlastG	coding_exon	69968	70213	.	-	.	ID=XP_007888490.1-R1-1-A1-E1;Parent=XP_007888490.1-R1-1-A1
NW_018078505.1	genBlastG	coding_exon	67203	67784	.	-	.	ID=XP_007888490.1-R1-1-A1-E2;Parent=XP_007888490.1-R1-1-A1
NW_018044092.1	genBlastG	transcript	37772	39364	26.13	+	.	ID=XP_007888682.1-R1-1-A1;Name=XP_007888682.1;PID=24.86;Coverage=38.95;Note=PID:24.86-Cover:38.95
NW_018044092.1	genBlastG	coding_exon	37772	37799	.	+	.	ID=XP_007888682.1-R1-1-A1-E1;Parent=XP_007888682.1-R1-1-A1
NW_018044092.1	genBlastG	coding_exon	38107	38196	.	+	.	ID=XP_007888682.1-R1-1-A1-E2;Parent=XP_007888682.1-R1-1-A1
NW_018044092.1	genBlastG	coding_exon	38249	38368	.	+	.	ID=XP_007888682.1-R1-1-A1-E3;Parent=XP_007888682.1-R1-1-A1
NW_018044092.1	genBlastG	coding_exon	39198	39364	.	+	.	ID=XP_007888682.1-R1-1-A1-E4;Parent=XP_007888682.1-R1-1-A1
NW_018043218.1	genBlastG	transcript	12915	15928	32.68	-	.	ID=XP_007888708.1-R1-1-A1;Name=XP_007888708.1;PID=35.88;Coverage=80.95;Note=PID:35.88-Cover:80.95
NW_018043218.1	genBlastG	coding_exon	15688	15928	.	-	.	ID=XP_007888708.1-R1-1-A1-E1;Parent=XP_007888708.1-R1-1-A1
NW_018043218.1	genBlastG	coding_exon	13991	14236	.	-	.	ID=XP_007888708.1-R1-1-A1-E2;Parent=XP_007888708.1-R1-1-A1
NW_018043218.1	genBlastG	coding_exon	12990	13072	.	-	.	ID=XP_007888708.1-R1-1-A1-E3;Parent=XP_007888708.1-R1-1-A1
NW_018043218.1	genBlastG	coding_exon	12915	12959	.	-	.	ID=XP_007888708.1-R1-1-A1-E4;Parent=XP_007888708.1-R1-1-A1
NW_018080686.1	genBlastG	transcript	47967	49608	16.5	-	.	ID=XP_007888979.1-R1-1-A1;Name=XP_007888979.1;PID=23.42;Coverage=37.92;Note=PID:23.42-Cover:37.92
NW_018080686.1	genBlastG	coding_exon	49446	49608	.	-	.	ID=XP_007888979.1-R1-1-A1-E1;Parent=XP_007888979.1-R1-1-A1
NW_018080686.1	genBlastG	coding_exon	48449	48534	.	-	.	ID=XP_007888979.1-R1-1-A1-E2;Parent=XP_007888979.1-R1-1-A1
NW_018080686.1	genBlastG	coding_exon	48107	48158	.	-	.	ID=XP_007888979.1-R1-1-A1-E3;Parent=XP_007888979.1-R1-1-A1
NW_018080686.1	genBlastG	coding_exon	47967	48073	.	-	.	ID=XP_007888979.1-R1-1-A1-E4;Parent=XP_007888979.1-R1-1-A1
NW_018040703.1	genBlastG	transcript	13916	38672	-10.13	-	.	ID=XP_007888983.1-R1-1-A1;Name=XP_007888983.1;PID=21.32;Coverage=32.55;Note=PID:21.32-Cover:32.55
NW_018040703.1	genBlastG	coding_exon	38587	38672	.	-	.	ID=XP_007888983.1-R1-1-A1-E1;Parent=XP_007888983.1-R1-1-A1
NW_018040703.1	genBlastG	coding_exon	38297	38390	.	-	.	ID=XP_007888983.1-R1-1-A1-E2;Parent=XP_007888983.1-R1-1-A1
NW_018040703.1	genBlastG	coding_exon	14667	14695	.	-	.	ID=XP_007888983.1-R1-1-A1-E3;Parent=XP_007888983.1-R1-1-A1
NW_018040703.1	genBlastG	coding_exon	14506	14631	.	-	.	ID=XP_007888983.1-R1-1-A1-E4;Parent=XP_007888983.1-R1-1-A1
NW_018040703.1	genBlastG	coding_exon	13916	14039	.	-	.	ID=XP_007888983.1-R1-1-A1-E5;Parent=XP_007888983.1-R1-1-A1
NW_018076161.1	genBlastG	transcript	36174	39546	113.3	-	.	ID=XP_007888996.1-R1-1-A1;Name=XP_007888996.1;PID=40.48;Coverage=72.54;Note=PID:40.48-Cover:72.54
NW_018076161.1	genBlastG	coding_exon	39528	39546	.	-	.	ID=XP_007888996.1-R1-1-A1-E1;Parent=XP_007888996.1-R1-1-A1
NW_018076161.1	genBlastG	coding_exon	38780	38919	.	-	.	ID=XP_007888996.1-R1-1-A1-E2;Parent=XP_007888996.1-R1-1-A1
NW_018076161.1	genBlastG	coding_exon	38426	38762	.	-	.	ID=XP_007888996.1-R1-1-A1-E3;Parent=XP_007888996.1-R1-1-A1
NW_018076161.1	genBlastG	coding_exon	38137	38406	.	-	.	ID=XP_007888996.1-R1-1-A1-E4;Parent=XP_007888996.1-R1-1-A1
NW_018076161.1	genBlastG	coding_exon	38066	38107	.	-	.	ID=XP_007888996.1-R1-1-A1-E5;Parent=XP_007888996.1-R1-1-A1
NW_018076161.1	genBlastG	coding_exon	37892	38038	.	-	.	ID=XP_007888996.1-R1-1-A1-E6;Parent=XP_007888996.1-R1-1-A1
NW_018076161.1	genBlastG	coding_exon	37787	37834	.	-	.	ID=XP_007888996.1-R1-1-A1-E7;Parent=XP_007888996.1-R1-1-A1
NW_018076161.1	genBlastG	coding_exon	37687	37765	.	-	.	ID=XP_007888996.1-R1-1-A1-E8;Parent=XP_007888996.1-R1-1-A1
NW_018076161.1	genBlastG	coding_exon	36523	36663	.	-	.	ID=XP_007888996.1-R1-1-A1-E9;Parent=XP_007888996.1-R1-1-A1
NW_018076161.1	genBlastG	coding_exon	36458	36492	.	-	.	ID=XP_007888996.1-R1-1-A1-E10;Parent=XP_007888996.1-R1-1-A1
NW_018076161.1	genBlastG	coding_exon	36374	36415	.	-	.	ID=XP_007888996.1-R1-1-A1-E11;Parent=XP_007888996.1-R1-1-A1
NW_018076161.1	genBlastG	coding_exon	36258	36349	.	-	.	ID=XP_007888996.1-R1-1-A1-E12;Parent=XP_007888996.1-R1-1-A1
NW_018076161.1	genBlastG	coding_exon	36174	36242	.	-	.	ID=XP_007888996.1-R1-1-A1-E13;Parent=XP_007888996.1-R1-1-A1
NW_018079116.1	genBlastG	transcript	78349	78606	-7.683	+	.	ID=XP_007889077.1-R1-1-A1;Name=XP_007889077.1;PID=13.77;Coverage=18.01;Note=PID:13.77-Cover:18.01
NW_018079116.1	genBlastG	coding_exon	78349	78606	.	+	.	ID=XP_007889077.1-R1-1-A1-E1;Parent=XP_007889077.1-R1-1-A1
NW_018056731.1	genBlastG	transcript	18911	35645	45.58	+	.	ID=XP_007889451.1-R1-1-A1;Name=XP_007889451.1;PID=32;Coverage=62.34;Note=PID:32-Cover:62.34
NW_018056731.1	genBlastG	coding_exon	18911	18957	.	+	.	ID=XP_007889451.1-R1-1-A1-E1;Parent=XP_007889451.1-R1-1-A1
NW_018056731.1	genBlastG	coding_exon	18973	19079	.	+	.	ID=XP_007889451.1-R1-1-A1-E2;Parent=XP_007889451.1-R1-1-A1
NW_018056731.1	genBlastG	coding_exon	19664	19809	.	+	.	ID=XP_007889451.1-R1-1-A1-E3;Parent=XP_007889451.1-R1-1-A1
NW_018056731.1	genBlastG	coding_exon	28055	28151	.	+	.	ID=XP_007889451.1-R1-1-A1-E4;Parent=XP_007889451.1-R1-1-A1
NW_018056731.1	genBlastG	coding_exon	28170	28205	.	+	.	ID=XP_007889451.1-R1-1-A1-E5;Parent=XP_007889451.1-R1-1-A1
NW_018056731.1	genBlastG	coding_exon	34138	34675	.	+	.	ID=XP_007889451.1-R1-1-A1-E6;Parent=XP_007889451.1-R1-1-A1
NW_018056731.1	genBlastG	coding_exon	35591	35645	.	+	.	ID=XP_007889451.1-R1-1-A1-E7;Parent=XP_007889451.1-R1-1-A1
NW_018057508.1	genBlastG	transcript	258871	260449	28.59	+	.	ID=XP_007889472.1-R1-1-A1;Name=XP_007889472.1;PID=34.91;Coverage=98.56;Note=PID:34.91-Cover:98.56
NW_018057508.1	genBlastG	coding_exon	258871	259553	.	+	.	ID=XP_007889472.1-R1-1-A1-E1;Parent=XP_007889472.1-R1-1-A1
NW_018057508.1	genBlastG	coding_exon	260311	260449	.	+	.	ID=XP_007889472.1-R1-1-A1-E2;Parent=XP_007889472.1-R1-1-A1
NW_018036203.1	genBlastG	transcript	31788	32530	17	-	.	ID=XP_007889575.1-R1-1-A1;Name=XP_007889575.1;PID=39.45;Coverage=72.16;Note=PID:39.45-Cover:72.16
NW_018036203.1	genBlastG	coding_exon	32488	32530	.	-	.	ID=XP_007889575.1-R1-1-A1-E1;Parent=XP_007889575.1-R1-1-A1
NW_018036203.1	genBlastG	coding_exon	31788	31957	.	-	.	ID=XP_007889575.1-R1-1-A1-E2;Parent=XP_007889575.1-R1-1-A1
NW_018028558.1	genBlastG	transcript	83319	84780	16.5	+	.	ID=XP_007889647.1-R1-1-A1;Name=XP_007889647.1;PID=58.43;Coverage=100;Note=PID:58.43-Cover:100
NW_018028558.1	genBlastG	coding_exon	83319	83384	.	+	.	ID=XP_007889647.1-R1-1-A1-E1;Parent=XP_007889647.1-R1-1-A1
NW_018028558.1	genBlastG	coding_exon	84046	84185	.	+	.	ID=XP_007889647.1-R1-1-A1-E2;Parent=XP_007889647.1-R1-1-A1
NW_018028558.1	genBlastG	coding_exon	84744	84780	.	+	.	ID=XP_007889647.1-R1-1-A1-E3;Parent=XP_007889647.1-R1-1-A1
NW_018028558.1	genBlastG	transcript	95143	96604	16.5	+	.	ID=XP_007889647.1-R1-2-A1;Name=XP_007889647.1;PID=58.43;Coverage=100;Note=PID:58.43-Cover:100
NW_018028558.1	genBlastG	coding_exon	95143	95208	.	+	.	ID=XP_007889647.1-R1-2-A1-E1;Parent=XP_007889647.1-R1-2-A1
NW_018028558.1	genBlastG	coding_exon	95870	96009	.	+	.	ID=XP_007889647.1-R1-2-A1-E2;Parent=XP_007889647.1-R1-2-A1
NW_018028558.1	genBlastG	coding_exon	96568	96604	.	+	.	ID=XP_007889647.1-R1-2-A1-E3;Parent=XP_007889647.1-R1-2-A1
NW_018028558.1	genBlastG	transcript	118786	120255	16.5	+	.	ID=XP_007889647.1-R1-3-A1;Name=XP_007889647.1;PID=61.18;Coverage=100;Note=PID:61.18-Cover:100
NW_018028558.1	genBlastG	coding_exon	118786	118851	.	+	.	ID=XP_007889647.1-R1-3-A1-E1;Parent=XP_007889647.1-R1-3-A1
NW_018028558.1	genBlastG	coding_exon	119513	119652	.	+	.	ID=XP_007889647.1-R1-3-A1-E2;Parent=XP_007889647.1-R1-3-A1
NW_018028558.1	genBlastG	coding_exon	120219	120255	.	+	.	ID=XP_007889647.1-R1-3-A1-E3;Parent=XP_007889647.1-R1-3-A1
NW_018051022.1	genBlastG	transcript	2411	4974	30.77	+	.	ID=XP_007889843.1-R1-1-A1;Name=XP_007889843.1;PID=31.49;Coverage=56.39;Note=PID:31.49-Cover:56.39
NW_018051022.1	genBlastG	coding_exon	2411	2619	.	+	.	ID=XP_007889843.1-R1-1-A1-E1;Parent=XP_007889843.1-R1-1-A1
NW_018051022.1	genBlastG	coding_exon	3318	3565	.	+	.	ID=XP_007889843.1-R1-1-A1-E2;Parent=XP_007889843.1-R1-1-A1
NW_018051022.1	genBlastG	coding_exon	4754	4974	.	+	.	ID=XP_007889843.1-R1-1-A1-E3;Parent=XP_007889843.1-R1-1-A1
NW_018033411.1	genBlastG	transcript	27636	28971	46.63	+	.	ID=XP_007889980.1-R1-1-A1;Name=XP_007889980.1;PID=38.77;Coverage=87.86;Note=PID:38.77-Cover:87.86
NW_018033411.1	genBlastG	coding_exon	27636	27652	.	+	.	ID=XP_007889980.1-R1-1-A1-E1;Parent=XP_007889980.1-R1-1-A1
NW_018033411.1	genBlastG	coding_exon	27766	28354	.	+	.	ID=XP_007889980.1-R1-1-A1-E2;Parent=XP_007889980.1-R1-1-A1
NW_018033411.1	genBlastG	coding_exon	28837	28971	.	+	.	ID=XP_007889980.1-R1-1-A1-E3;Parent=XP_007889980.1-R1-1-A1
NW_018043252.1	genBlastG	transcript	72802	74034	11.02	+	.	ID=XP_007890163.1-R1-1-A1;Name=XP_007890163.1;PID=28.49;Coverage=52.69;Note=PID:28.49-Cover:52.69
NW_018043252.1	genBlastG	coding_exon	72802	72903	.	+	.	ID=XP_007890163.1-R1-1-A1-E1;Parent=XP_007890163.1-R1-1-A1
NW_018043252.1	genBlastG	coding_exon	73706	73802	.	+	.	ID=XP_007890163.1-R1-1-A1-E2;Parent=XP_007890163.1-R1-1-A1
NW_018043252.1	genBlastG	coding_exon	73967	74034	.	+	.	ID=XP_007890163.1-R1-1-A1-E3;Parent=XP_007890163.1-R1-1-A1
NW_018042401.1	genBlastG	transcript	79415	80187	14.5	-	.	ID=XP_007890165.1-R1-1-A1;Name=XP_007890165.1;PID=24.84;Coverage=89.12;Note=PID:24.84-Cover:89.12
NW_018042401.1	genBlastG	coding_exon	80139	80187	.	-	.	ID=XP_007890165.1-R1-1-A1-E1;Parent=XP_007890165.1-R1-1-A1
NW_018042401.1	genBlastG	coding_exon	79954	80103	.	-	.	ID=XP_007890165.1-R1-1-A1-E2;Parent=XP_007890165.1-R1-1-A1
NW_018042401.1	genBlastG	coding_exon	79872	79911	.	-	.	ID=XP_007890165.1-R1-1-A1-E3;Parent=XP_007890165.1-R1-1-A1
NW_018042401.1	genBlastG	coding_exon	79415	79817	.	-	.	ID=XP_007890165.1-R1-1-A1-E4;Parent=XP_007890165.1-R1-1-A1
NW_018074668.1	genBlastG	transcript	120441	122331	16.5	-	.	ID=XP_007890174.1-R1-1-A1;Name=XP_007890174.1;PID=25.61;Coverage=45.62;Note=PID:25.61-Cover:45.62
NW_018074668.1	genBlastG	coding_exon	122250	122331	.	-	.	ID=XP_007890174.1-R1-1-A1-E1;Parent=XP_007890174.1-R1-1-A1
NW_018074668.1	genBlastG	coding_exon	121401	121629	.	-	.	ID=XP_007890174.1-R1-1-A1-E2;Parent=XP_007890174.1-R1-1-A1
NW_018074668.1	genBlastG	coding_exon	120441	120507	.	-	.	ID=XP_007890174.1-R1-1-A1-E3;Parent=XP_007890174.1-R1-1-A1
NW_018042021.1	genBlastG	transcript	28599	29440	19	+	.	ID=XP_007890246.1-R1-1-A1;Name=XP_007890246.1;PID=25.09;Coverage=44.94;Note=PID:25.09-Cover:44.94
NW_018042021.1	genBlastG	coding_exon	28599	28712	.	+	.	ID=XP_007890246.1-R1-1-A1-E1;Parent=XP_007890246.1-R1-1-A1
NW_018042021.1	genBlastG	coding_exon	29192	29440	.	+	.	ID=XP_007890246.1-R1-1-A1-E2;Parent=XP_007890246.1-R1-1-A1
NW_018062919.1	genBlastG	transcript	107734	107970	33	-	.	ID=XP_007890346.1-R1-1-A1;Name=XP_007890346.1;PID=88.61;Coverage=100;Note=PID:88.61-Cover:100
NW_018062919.1	genBlastG	coding_exon	107734	107970	.	-	.	ID=XP_007890346.1-R1-1-A1-E1;Parent=XP_007890346.1-R1-1-A1
NW_018040288.1	genBlastG	transcript	97691	107572	28.57	-	.	ID=XP_007890427.1-R1-1-A1;Name=XP_007890427.1;PID=24.68;Coverage=27.85;Note=PID:24.68-Cover:27.85
NW_018040288.1	genBlastG	coding_exon	107500	107572	.	-	.	ID=XP_007890427.1-R1-1-A1-E1;Parent=XP_007890427.1-R1-1-A1
NW_018040288.1	genBlastG	coding_exon	106586	106691	.	-	.	ID=XP_007890427.1-R1-1-A1-E2;Parent=XP_007890427.1-R1-1-A1
NW_018040288.1	genBlastG	coding_exon	97691	97778	.	-	.	ID=XP_007890427.1-R1-1-A1-E3;Parent=XP_007890427.1-R1-1-A1
NW_018071344.1	genBlastG	transcript	10271	11888	40.33	+	.	ID=XP_007890515.1-R1-1-A1;Name=XP_007890515.1;PID=24.96;Coverage=45.71;Note=PID:24.96-Cover:45.71
NW_018071344.1	genBlastG	coding_exon	10271	10328	.	+	.	ID=XP_007890515.1-R1-1-A1-E1;Parent=XP_007890515.1-R1-1-A1
NW_018071344.1	genBlastG	coding_exon	11113	11888	.	+	.	ID=XP_007890515.1-R1-1-A1-E2;Parent=XP_007890515.1-R1-1-A1
NW_018029391.1	genBlastG	transcript	88654	89226	26.2	+	.	ID=XP_007890729.1-R1-1-A1;Name=XP_007890729.1;PID=20.92;Coverage=39.36;Note=PID:20.92-Cover:39.36
NW_018029391.1	genBlastG	coding_exon	88654	89001	.	+	.	ID=XP_007890729.1-R1-1-A1-E1;Parent=XP_007890729.1-R1-1-A1
NW_018029391.1	genBlastG	coding_exon	89128	89226	.	+	.	ID=XP_007890729.1-R1-1-A1-E2;Parent=XP_007890729.1-R1-1-A1
NW_018073391.1	genBlastG	transcript	50967	63525	43.87	-	.	ID=XP_007891177.1-R1-1-A1;Name=XP_007891177.1;PID=36.83;Coverage=77.3;Note=PID:36.83-Cover:77.3
NW_018073391.1	genBlastG	coding_exon	63375	63525	.	-	.	ID=XP_007891177.1-R1-1-A1-E1;Parent=XP_007891177.1-R1-1-A1
NW_018073391.1	genBlastG	coding_exon	62455	62584	.	-	.	ID=XP_007891177.1-R1-1-A1-E2;Parent=XP_007891177.1-R1-1-A1
NW_018073391.1	genBlastG	coding_exon	62173	62354	.	-	.	ID=XP_007891177.1-R1-1-A1-E3;Parent=XP_007891177.1-R1-1-A1
NW_018073391.1	genBlastG	coding_exon	60918	61081	.	-	.	ID=XP_007891177.1-R1-1-A1-E4;Parent=XP_007891177.1-R1-1-A1
NW_018073391.1	genBlastG	coding_exon	50967	51200	.	-	.	ID=XP_007891177.1-R1-1-A1-E5;Parent=XP_007891177.1-R1-1-A1
NW_018035336.1	genBlastG	transcript	12748	14063	24.34	+	.	ID=XP_007891179.1-R1-1-A1;Name=XP_007891179.1;PID=17.71;Coverage=29.67;Note=PID:17.71-Cover:29.67
NW_018035336.1	genBlastG	coding_exon	12748	12812	.	+	.	ID=XP_007891179.1-R1-1-A1-E1;Parent=XP_007891179.1-R1-1-A1
NW_018035336.1	genBlastG	coding_exon	13551	13709	.	+	.	ID=XP_007891179.1-R1-1-A1-E2;Parent=XP_007891179.1-R1-1-A1
NW_018035336.1	genBlastG	coding_exon	13799	14063	.	+	.	ID=XP_007891179.1-R1-1-A1-E3;Parent=XP_007891179.1-R1-1-A1
NW_018077980.1	genBlastG	transcript	175333	176113	-14.5	-	.	ID=XP_007891339.1-R1-1-A1;Name=XP_007891339.1;PID=21.78;Coverage=43.21;Note=PID:21.78-Cover:43.21
NW_018077980.1	genBlastG	coding_exon	176108	176113	.	-	.	ID=XP_007891339.1-R1-1-A1-E1;Parent=XP_007891339.1-R1-1-A1
NW_018077980.1	genBlastG	coding_exon	176046	176068	.	-	.	ID=XP_007891339.1-R1-1-A1-E2;Parent=XP_007891339.1-R1-1-A1
NW_018077980.1	genBlastG	coding_exon	175842	175988	.	-	.	ID=XP_007891339.1-R1-1-A1-E3;Parent=XP_007891339.1-R1-1-A1
NW_018077980.1	genBlastG	coding_exon	175333	175522	.	-	.	ID=XP_007891339.1-R1-1-A1-E4;Parent=XP_007891339.1-R1-1-A1
NW_018078974.1	genBlastG	transcript	9144	12188	-7.038	+	.	ID=XP_007891344.1-R1-1-A1;Name=XP_007891344.1;PID=24.84;Coverage=36.03;Note=PID:24.84-Cover:36.03
NW_018078974.1	genBlastG	coding_exon	9144	9149	.	+	.	ID=XP_007891344.1-R1-1-A1-E1;Parent=XP_007891344.1-R1-1-A1
NW_018078974.1	genBlastG	coding_exon	9258	9305	.	+	.	ID=XP_007891344.1-R1-1-A1-E2;Parent=XP_007891344.1-R1-1-A1
NW_018078974.1	genBlastG	coding_exon	9726	9989	.	+	.	ID=XP_007891344.1-R1-1-A1-E3;Parent=XP_007891344.1-R1-1-A1
NW_018078974.1	genBlastG	coding_exon	11671	11818	.	+	.	ID=XP_007891344.1-R1-1-A1-E4;Parent=XP_007891344.1-R1-1-A1
NW_018078974.1	genBlastG	coding_exon	12085	12106	.	+	.	ID=XP_007891344.1-R1-1-A1-E5;Parent=XP_007891344.1-R1-1-A1
NW_018078974.1	genBlastG	coding_exon	12167	12188	.	+	.	ID=XP_007891344.1-R1-1-A1-E6;Parent=XP_007891344.1-R1-1-A1
NW_018048486.1	genBlastG	transcript	997	2517	16	-	.	ID=XP_007891388.1-R1-1-A1;Name=XP_007891388.1;PID=32.62;Coverage=77.72;Note=PID:32.62-Cover:77.72
NW_018048486.1	genBlastG	coding_exon	2404	2517	.	-	.	ID=XP_007891388.1-R1-1-A1-E1;Parent=XP_007891388.1-R1-1-A1
NW_018048486.1	genBlastG	coding_exon	1383	1511	.	-	.	ID=XP_007891388.1-R1-1-A1-E2;Parent=XP_007891388.1-R1-1-A1
NW_018048486.1	genBlastG	coding_exon	997	1206	.	-	.	ID=XP_007891388.1-R1-1-A1-E3;Parent=XP_007891388.1-R1-1-A1
NW_018046274.1	genBlastG	transcript	29543	30848	16	+	.	ID=XP_007891388.1-R1-2-A1;Name=XP_007891388.1;PID=31.05;Coverage=63.73;Note=PID:31.05-Cover:63.73
NW_018046274.1	genBlastG	coding_exon	29543	29592	.	+	.	ID=XP_007891388.1-R1-2-A1-E1;Parent=XP_007891388.1-R1-2-A1
NW_018046274.1	genBlastG	coding_exon	30351	30462	.	+	.	ID=XP_007891388.1-R1-2-A1-E2;Parent=XP_007891388.1-R1-2-A1
NW_018046274.1	genBlastG	coding_exon	30639	30848	.	+	.	ID=XP_007891388.1-R1-2-A1-E3;Parent=XP_007891388.1-R1-2-A1
NW_018065389.1	genBlastG	transcript	6635	7415	0.371	-	.	ID=XP_007891459.1-R1-1-A1;Name=XP_007891459.1;PID=32.56;Coverage=78.5;Note=PID:32.56-Cover:78.5
NW_018065389.1	genBlastG	coding_exon	7370	7415	.	-	.	ID=XP_007891459.1-R1-1-A1-E1;Parent=XP_007891459.1-R1-1-A1
NW_018065389.1	genBlastG	coding_exon	6635	6843	.	-	.	ID=XP_007891459.1-R1-1-A1-E2;Parent=XP_007891459.1-R1-1-A1
NW_018065388.1	genBlastG	transcript	9216	9996	0.371	-	.	ID=XP_007891459.1-R1-2-A1;Name=XP_007891459.1;PID=32.56;Coverage=78.5;Note=PID:32.56-Cover:78.5
NW_018065388.1	genBlastG	coding_exon	9951	9996	.	-	.	ID=XP_007891459.1-R1-2-A1-E1;Parent=XP_007891459.1-R1-2-A1
NW_018065388.1	genBlastG	coding_exon	9216	9424	.	-	.	ID=XP_007891459.1-R1-2-A1-E2;Parent=XP_007891459.1-R1-2-A1
NW_018028555.1	genBlastG	transcript	9273	10054	0.371	-	.	ID=XP_007891459.1-R1-3-A1;Name=XP_007891459.1;PID=32.56;Coverage=78.5;Note=PID:32.56-Cover:78.5
NW_018028555.1	genBlastG	coding_exon	10009	10054	.	-	.	ID=XP_007891459.1-R1-3-A1-E1;Parent=XP_007891459.1-R1-3-A1
NW_018028555.1	genBlastG	coding_exon	9273	9481	.	-	.	ID=XP_007891459.1-R1-3-A1-E2;Parent=XP_007891459.1-R1-3-A1
NW_018030156.1	genBlastG	transcript	2609	3883	36.86	+	.	ID=XP_007891555.1-R1-1-A1;Name=XP_007891555.1;PID=40.63;Coverage=100;Note=PID:40.63-Cover:100
NW_018030156.1	genBlastG	coding_exon	2609	3289	.	+	.	ID=XP_007891555.1-R1-1-A1-E1;Parent=XP_007891555.1-R1-1-A1
NW_018030156.1	genBlastG	coding_exon	3797	3883	.	+	.	ID=XP_007891555.1-R1-1-A1-E2;Parent=XP_007891555.1-R1-1-A1
NW_018038269.1	genBlastG	transcript	26896	58297	28.85	-	.	ID=XP_007891694.1-R1-1-A1;Name=XP_007891694.1;PID=29.91;Coverage=67.54;Note=PID:29.91-Cover:67.54
NW_018038269.1	genBlastG	coding_exon	58108	58297	.	-	.	ID=XP_007891694.1-R1-1-A1-E1;Parent=XP_007891694.1-R1-1-A1
NW_018038269.1	genBlastG	coding_exon	57538	57770	.	-	.	ID=XP_007891694.1-R1-1-A1-E2;Parent=XP_007891694.1-R1-1-A1
NW_018038269.1	genBlastG	coding_exon	27629	27781	.	-	.	ID=XP_007891694.1-R1-1-A1-E3;Parent=XP_007891694.1-R1-1-A1
NW_018038269.1	genBlastG	coding_exon	26896	26940	.	-	.	ID=XP_007891694.1-R1-1-A1-E4;Parent=XP_007891694.1-R1-1-A1
NW_018042027.1	genBlastG	transcript	15890	16310	30	-	.	ID=XP_007891720.1-R1-1-A1;Name=XP_007891720.1;PID=28.44;Coverage=50.49;Note=PID:28.44-Cover:50.49
NW_018042027.1	genBlastG	coding_exon	16242	16310	.	-	.	ID=XP_007891720.1-R1-1-A1-E1;Parent=XP_007891720.1-R1-1-A1
NW_018042027.1	genBlastG	coding_exon	16129	16187	.	-	.	ID=XP_007891720.1-R1-1-A1-E2;Parent=XP_007891720.1-R1-1-A1
NW_018042027.1	genBlastG	coding_exon	15977	16088	.	-	.	ID=XP_007891720.1-R1-1-A1-E3;Parent=XP_007891720.1-R1-1-A1
NW_018042027.1	genBlastG	coding_exon	15890	15961	.	-	.	ID=XP_007891720.1-R1-1-A1-E4;Parent=XP_007891720.1-R1-1-A1
NW_018046413.1	genBlastG	transcript	14037	28630	108.1	+	.	ID=XP_007891922.1-R1-1-A1;Name=XP_007891922.1;PID=63.16;Coverage=69.83;Note=PID:63.16-Cover:69.83
NW_018046413.1	genBlastG	coding_exon	14037	14072	.	+	.	ID=XP_007891922.1-R1-1-A1-E1;Parent=XP_007891922.1-R1-1-A1
NW_018046413.1	genBlastG	coding_exon	14919	15533	.	+	.	ID=XP_007891922.1-R1-1-A1-E2;Parent=XP_007891922.1-R1-1-A1
NW_018046413.1	genBlastG	coding_exon	27314	27434	.	+	.	ID=XP_007891922.1-R1-1-A1-E3;Parent=XP_007891922.1-R1-1-A1
NW_018046413.1	genBlastG	coding_exon	27825	28007	.	+	.	ID=XP_007891922.1-R1-1-A1-E4;Parent=XP_007891922.1-R1-1-A1
NW_018046413.1	genBlastG	coding_exon	28590	28630	.	+	.	ID=XP_007891922.1-R1-1-A1-E5;Parent=XP_007891922.1-R1-1-A1
NW_018077407.1	genBlastG	transcript	5261	5782	14.85	-	.	ID=XP_007891941.1-R1-1-A1;Name=XP_007891941.1;PID=31.38;Coverage=54.24;Note=PID:31.38-Cover:54.24
NW_018077407.1	genBlastG	coding_exon	5608	5782	.	-	.	ID=XP_007891941.1-R1-1-A1-E1;Parent=XP_007891941.1-R1-1-A1
NW_018077407.1	genBlastG	coding_exon	5261	5376	.	-	.	ID=XP_007891941.1-R1-1-A1-E2;Parent=XP_007891941.1-R1-1-A1
NW_018028610.1	genBlastG	transcript	14819	15589	25	+	.	ID=XP_007892010.1-R1-1-A1;Name=XP_007892010.1;PID=37.38;Coverage=77.72;Note=PID:37.38-Cover:77.72
NW_018028610.1	genBlastG	coding_exon	14819	14886	.	+	.	ID=XP_007892010.1-R1-1-A1-E1;Parent=XP_007892010.1-R1-1-A1
NW_018028610.1	genBlastG	coding_exon	14920	14967	.	+	.	ID=XP_007892010.1-R1-1-A1-E2;Parent=XP_007892010.1-R1-1-A1
NW_018028610.1	genBlastG	coding_exon	15253	15589	.	+	.	ID=XP_007892010.1-R1-1-A1-E3;Parent=XP_007892010.1-R1-1-A1
NW_018056143.1	genBlastG	transcript	132717	133514	27.96	+	.	ID=XP_007892016.1-R1-1-A1;Name=XP_007892016.1;PID=19.35;Coverage=30.29;Note=PID:19.35-Cover:30.29
NW_018056143.1	genBlastG	coding_exon	132717	132790	.	+	.	ID=XP_007892016.1-R1-1-A1-E1;Parent=XP_007892016.1-R1-1-A1
NW_018056143.1	genBlastG	coding_exon	132856	132906	.	+	.	ID=XP_007892016.1-R1-1-A1-E2;Parent=XP_007892016.1-R1-1-A1
NW_018056143.1	genBlastG	coding_exon	132982	132987	.	+	.	ID=XP_007892016.1-R1-1-A1-E3;Parent=XP_007892016.1-R1-1-A1
NW_018056143.1	genBlastG	coding_exon	133033	133324	.	+	.	ID=XP_007892016.1-R1-1-A1-E4;Parent=XP_007892016.1-R1-1-A1
NW_018056143.1	genBlastG	coding_exon	133467	133514	.	+	.	ID=XP_007892016.1-R1-1-A1-E5;Parent=XP_007892016.1-R1-1-A1
NW_018032161.1	genBlastG	transcript	4122	31290	27.62	-	.	ID=XP_007892176.1-R1-1-A1;Name=XP_007892176.1;PID=24.02;Coverage=33.55;Note=PID:24.02-Cover:33.55
NW_018032161.1	genBlastG	coding_exon	31132	31290	.	-	.	ID=XP_007892176.1-R1-1-A1-E1;Parent=XP_007892176.1-R1-1-A1
NW_018032161.1	genBlastG	coding_exon	30492	30602	.	-	.	ID=XP_007892176.1-R1-1-A1-E2;Parent=XP_007892176.1-R1-1-A1
NW_018032161.1	genBlastG	coding_exon	25247	25461	.	-	.	ID=XP_007892176.1-R1-1-A1-E3;Parent=XP_007892176.1-R1-1-A1
NW_018032161.1	genBlastG	coding_exon	18848	18988	.	-	.	ID=XP_007892176.1-R1-1-A1-E4;Parent=XP_007892176.1-R1-1-A1
NW_018032161.1	genBlastG	coding_exon	13069	13148	.	-	.	ID=XP_007892176.1-R1-1-A1-E5;Parent=XP_007892176.1-R1-1-A1
NW_018032161.1	genBlastG	coding_exon	9664	9803	.	-	.	ID=XP_007892176.1-R1-1-A1-E6;Parent=XP_007892176.1-R1-1-A1
NW_018032161.1	genBlastG	coding_exon	4877	5004	.	-	.	ID=XP_007892176.1-R1-1-A1-E7;Parent=XP_007892176.1-R1-1-A1
NW_018032161.1	genBlastG	coding_exon	4229	4284	.	-	.	ID=XP_007892176.1-R1-1-A1-E8;Parent=XP_007892176.1-R1-1-A1
NW_018032161.1	genBlastG	coding_exon	4122	4177	.	-	.	ID=XP_007892176.1-R1-1-A1-E9;Parent=XP_007892176.1-R1-1-A1
NW_018030445.1	genBlastG	transcript	109852	140796	65.34	+	.	ID=XP_007892407.1-R1-1-A1;Name=XP_007892407.1;PID=56.29;Coverage=100;Note=PID:56.29-Cover:100
NW_018030445.1	genBlastG	coding_exon	109852	109863	.	+	.	ID=XP_007892407.1-R1-1-A1-E1;Parent=XP_007892407.1-R1-1-A1
NW_018030445.1	genBlastG	coding_exon	110624	110961	.	+	.	ID=XP_007892407.1-R1-1-A1-E2;Parent=XP_007892407.1-R1-1-A1
NW_018030445.1	genBlastG	coding_exon	121224	121345	.	+	.	ID=XP_007892407.1-R1-1-A1-E3;Parent=XP_007892407.1-R1-1-A1
NW_018030445.1	genBlastG	coding_exon	126895	126989	.	+	.	ID=XP_007892407.1-R1-1-A1-E4;Parent=XP_007892407.1-R1-1-A1
NW_018030445.1	genBlastG	coding_exon	132251	132377	.	+	.	ID=XP_007892407.1-R1-1-A1-E5;Parent=XP_007892407.1-R1-1-A1
NW_018030445.1	genBlastG	coding_exon	139641	139780	.	+	.	ID=XP_007892407.1-R1-1-A1-E6;Parent=XP_007892407.1-R1-1-A1
NW_018030445.1	genBlastG	coding_exon	140755	140796	.	+	.	ID=XP_007892407.1-R1-1-A1-E7;Parent=XP_007892407.1-R1-1-A1
NW_018039376.1	genBlastG	transcript	108187	110199	5.71	-	.	ID=XP_007892502.1-R1-1-A1;Name=XP_007892502.1;PID=45.68;Coverage=82.4;Note=PID:45.68-Cover:82.4
NW_018039376.1	genBlastG	coding_exon	110169	110199	.	-	.	ID=XP_007892502.1-R1-1-A1-E1;Parent=XP_007892502.1-R1-1-A1
NW_018039376.1	genBlastG	coding_exon	109890	110132	.	-	.	ID=XP_007892502.1-R1-1-A1-E2;Parent=XP_007892502.1-R1-1-A1
NW_018039376.1	genBlastG	coding_exon	108305	108625	.	-	.	ID=XP_007892502.1-R1-1-A1-E3;Parent=XP_007892502.1-R1-1-A1
NW_018039376.1	genBlastG	coding_exon	108187	108212	.	-	.	ID=XP_007892502.1-R1-1-A1-E4;Parent=XP_007892502.1-R1-1-A1
NW_018030153.1	genBlastG	transcript	151346	178921	41.99	-	.	ID=XP_007892557.1-R1-1-A1;Name=XP_007892557.1;PID=56.65;Coverage=96.86;Note=PID:56.65-Cover:96.86
NW_018030153.1	genBlastG	coding_exon	178915	178921	.	-	.	ID=XP_007892557.1-R1-1-A1-E1;Parent=XP_007892557.1-R1-1-A1
NW_018030153.1	genBlastG	coding_exon	178489	178650	.	-	.	ID=XP_007892557.1-R1-1-A1-E2;Parent=XP_007892557.1-R1-1-A1
NW_018030153.1	genBlastG	coding_exon	152134	152346	.	-	.	ID=XP_007892557.1-R1-1-A1-E3;Parent=XP_007892557.1-R1-1-A1
NW_018030153.1	genBlastG	coding_exon	151346	151428	.	-	.	ID=XP_007892557.1-R1-1-A1-E4;Parent=XP_007892557.1-R1-1-A1
NW_018037346.1	genBlastG	transcript	146623	147115	12.5	+	.	ID=XP_007892626.1-R1-1-A1;Name=XP_007892626.1;PID=45.65;Coverage=89.41;Note=PID:45.65-Cover:89.41
NW_018037346.1	genBlastG	coding_exon	146623	146775	.	+	.	ID=XP_007892626.1-R1-1-A1-E1;Parent=XP_007892626.1-R1-1-A1
NW_018037346.1	genBlastG	coding_exon	147038	147115	.	+	.	ID=XP_007892626.1-R1-1-A1-E2;Parent=XP_007892626.1-R1-1-A1
NW_018031201.1	genBlastG	transcript	194058	194441	49.21	+	.	ID=XP_007892734.1-R1-1-A1;Name=XP_007892734.1;PID=79.39;Coverage=100;Note=PID:79.39-Cover:100
NW_018031201.1	genBlastG	coding_exon	194058	194441	.	+	.	ID=XP_007892734.1-R1-1-A1-E1;Parent=XP_007892734.1-R1-1-A1
NW_018034832.1	genBlastG	transcript	80566	83434	75.12	+	.	ID=XP_007892750.1-R1-1-A1;Name=XP_007892750.1;PID=50.69;Coverage=94.88;Note=PID:50.69-Cover:94.88
NW_018034832.1	genBlastG	coding_exon	80566	80758	.	+	.	ID=XP_007892750.1-R1-1-A1-E1;Parent=XP_007892750.1-R1-1-A1
NW_018034832.1	genBlastG	coding_exon	81761	81895	.	+	.	ID=XP_007892750.1-R1-1-A1-E2;Parent=XP_007892750.1-R1-1-A1
NW_018034832.1	genBlastG	coding_exon	82335	82492	.	+	.	ID=XP_007892750.1-R1-1-A1-E3;Parent=XP_007892750.1-R1-1-A1
NW_018034832.1	genBlastG	coding_exon	82544	82981	.	+	.	ID=XP_007892750.1-R1-1-A1-E4;Parent=XP_007892750.1-R1-1-A1
NW_018034832.1	genBlastG	coding_exon	83411	83434	.	+	.	ID=XP_007892750.1-R1-1-A1-E5;Parent=XP_007892750.1-R1-1-A1
NW_018068489.1	genBlastG	transcript	58026	58780	23.88	-	.	ID=XP_007892925.1-R1-1-A1;Name=XP_007892925.1;PID=56.38;Coverage=90.11;Note=PID:56.38-Cover:90.11
NW_018068489.1	genBlastG	coding_exon	58545	58780	.	-	.	ID=XP_007892925.1-R1-1-A1-E1;Parent=XP_007892925.1-R1-1-A1
NW_018068489.1	genBlastG	coding_exon	58026	58038	.	-	.	ID=XP_007892925.1-R1-1-A1-E2;Parent=XP_007892925.1-R1-1-A1
NW_018055840.1	genBlastG	transcript	192062	194873	61.39	-	.	ID=XP_007893177.1-R1-1-A1;Name=XP_007893177.1;PID=56.88;Coverage=85.38;Note=PID:56.88-Cover:85.38
NW_018055840.1	genBlastG	coding_exon	194838	194873	.	-	.	ID=XP_007893177.1-R1-1-A1-E1;Parent=XP_007893177.1-R1-1-A1
NW_018055840.1	genBlastG	coding_exon	194305	194601	.	-	.	ID=XP_007893177.1-R1-1-A1-E2;Parent=XP_007893177.1-R1-1-A1
NW_018055840.1	genBlastG	coding_exon	192062	192379	.	-	.	ID=XP_007893177.1-R1-1-A1-E3;Parent=XP_007893177.1-R1-1-A1
NW_018029429.1	genBlastG	transcript	345241	376097	158.8	-	.	ID=XP_007893193.1-R1-1-A1;Name=XP_007893193.1;PID=42.34;Coverage=86.38;Note=PID:42.34-Cover:86.38
NW_018029429.1	genBlastG	coding_exon	376013	376097	.	-	.	ID=XP_007893193.1-R1-1-A1-E1;Parent=XP_007893193.1-R1-1-A1
NW_018029429.1	genBlastG	coding_exon	374828	375055	.	-	.	ID=XP_007893193.1-R1-1-A1-E2;Parent=XP_007893193.1-R1-1-A1
NW_018029429.1	genBlastG	coding_exon	373301	373737	.	-	.	ID=XP_007893193.1-R1-1-A1-E3;Parent=XP_007893193.1-R1-1-A1
NW_018029429.1	genBlastG	coding_exon	369284	369380	.	-	.	ID=XP_007893193.1-R1-1-A1-E4;Parent=XP_007893193.1-R1-1-A1
NW_018029429.1	genBlastG	coding_exon	362023	362216	.	-	.	ID=XP_007893193.1-R1-1-A1-E5;Parent=XP_007893193.1-R1-1-A1
NW_018029429.1	genBlastG	coding_exon	361762	362010	.	-	.	ID=XP_007893193.1-R1-1-A1-E6;Parent=XP_007893193.1-R1-1-A1
NW_018029429.1	genBlastG	coding_exon	357607	357635	.	-	.	ID=XP_007893193.1-R1-1-A1-E7;Parent=XP_007893193.1-R1-1-A1
NW_018029429.1	genBlastG	coding_exon	356629	356841	.	-	.	ID=XP_007893193.1-R1-1-A1-E8;Parent=XP_007893193.1-R1-1-A1
NW_018029429.1	genBlastG	coding_exon	354308	354513	.	-	.	ID=XP_007893193.1-R1-1-A1-E9;Parent=XP_007893193.1-R1-1-A1
NW_018029429.1	genBlastG	coding_exon	353981	354222	.	-	.	ID=XP_007893193.1-R1-1-A1-E10;Parent=XP_007893193.1-R1-1-A1
NW_018029429.1	genBlastG	coding_exon	351388	351577	.	-	.	ID=XP_007893193.1-R1-1-A1-E11;Parent=XP_007893193.1-R1-1-A1
NW_018029429.1	genBlastG	coding_exon	350491	350628	.	-	.	ID=XP_007893193.1-R1-1-A1-E12;Parent=XP_007893193.1-R1-1-A1
NW_018029429.1	genBlastG	coding_exon	350320	350409	.	-	.	ID=XP_007893193.1-R1-1-A1-E13;Parent=XP_007893193.1-R1-1-A1
NW_018029429.1	genBlastG	coding_exon	345641	345900	.	-	.	ID=XP_007893193.1-R1-1-A1-E14;Parent=XP_007893193.1-R1-1-A1
NW_018029429.1	genBlastG	coding_exon	345241	345267	.	-	.	ID=XP_007893193.1-R1-1-A1-E15;Parent=XP_007893193.1-R1-1-A1
NW_018036349.1	genBlastG	transcript	11765	12886	30.97	+	.	ID=XP_007893220.1-R1-1-A1;Name=XP_007893220.1;PID=27.87;Coverage=72.96;Note=PID:27.87-Cover:72.96
NW_018036349.1	genBlastG	coding_exon	11765	12410	.	+	.	ID=XP_007893220.1-R1-1-A1-E1;Parent=XP_007893220.1-R1-1-A1
NW_018036349.1	genBlastG	coding_exon	12753	12886	.	+	.	ID=XP_007893220.1-R1-1-A1-E2;Parent=XP_007893220.1-R1-1-A1
NW_018051356.1	genBlastG	transcript	12765	13345	2.362	-	.	ID=XP_007893444.1-R1-1-A1;Name=XP_007893444.1;PID=22.61;Coverage=30.25;Note=PID:22.61-Cover:30.25
NW_018051356.1	genBlastG	coding_exon	13299	13345	.	-	.	ID=XP_007893444.1-R1-1-A1-E1;Parent=XP_007893444.1-R1-1-A1
NW_018051356.1	genBlastG	coding_exon	13123	13242	.	-	.	ID=XP_007893444.1-R1-1-A1-E2;Parent=XP_007893444.1-R1-1-A1
NW_018051356.1	genBlastG	coding_exon	12765	12855	.	-	.	ID=XP_007893444.1-R1-1-A1-E3;Parent=XP_007893444.1-R1-1-A1
NW_018046005.1	genBlastG	transcript	9901	11364	2.362	-	.	ID=XP_007893444.1-R1-2-A1;Name=XP_007893444.1;PID=26.19;Coverage=44.48;Note=PID:26.19-Cover:44.48
NW_018046005.1	genBlastG	coding_exon	11239	11364	.	-	.	ID=XP_007893444.1-R1-2-A1-E1;Parent=XP_007893444.1-R1-2-A1
NW_018046005.1	genBlastG	coding_exon	10259	10419	.	-	.	ID=XP_007893444.1-R1-2-A1-E2;Parent=XP_007893444.1-R1-2-A1
NW_018046005.1	genBlastG	coding_exon	9901	9991	.	-	.	ID=XP_007893444.1-R1-2-A1-E3;Parent=XP_007893444.1-R1-2-A1
NW_018030782.1	genBlastG	transcript	238614	242636	32.5	+	.	ID=XP_007893640.1-R1-1-A1;Name=XP_007893640.1;PID=42.54;Coverage=74.41;Note=PID:42.54-Cover:74.41
NW_018030782.1	genBlastG	coding_exon	238614	238634	.	+	.	ID=XP_007893640.1-R1-1-A1-E1;Parent=XP_007893640.1-R1-1-A1
NW_018030782.1	genBlastG	coding_exon	239156	239262	.	+	.	ID=XP_007893640.1-R1-1-A1-E2;Parent=XP_007893640.1-R1-1-A1
NW_018030782.1	genBlastG	coding_exon	242291	242636	.	+	.	ID=XP_007893640.1-R1-1-A1-E3;Parent=XP_007893640.1-R1-1-A1
NW_018058795.1	genBlastG	transcript	110556	115619	48.2	-	.	ID=XP_007893773.1-R1-1-A1;Name=XP_007893773.1;PID=43.6;Coverage=83.66;Note=PID:43.6-Cover:83.66
NW_018058795.1	genBlastG	coding_exon	115591	115619	.	-	.	ID=XP_007893773.1-R1-1-A1-E1;Parent=XP_007893773.1-R1-1-A1
NW_018058795.1	genBlastG	coding_exon	115430	115578	.	-	.	ID=XP_007893773.1-R1-1-A1-E2;Parent=XP_007893773.1-R1-1-A1
NW_018058795.1	genBlastG	coding_exon	114844	114983	.	-	.	ID=XP_007893773.1-R1-1-A1-E3;Parent=XP_007893773.1-R1-1-A1
NW_018058795.1	genBlastG	coding_exon	112535	112674	.	-	.	ID=XP_007893773.1-R1-1-A1-E4;Parent=XP_007893773.1-R1-1-A1
NW_018058795.1	genBlastG	coding_exon	112452	112483	.	-	.	ID=XP_007893773.1-R1-1-A1-E5;Parent=XP_007893773.1-R1-1-A1
NW_018058795.1	genBlastG	coding_exon	110957	111043	.	-	.	ID=XP_007893773.1-R1-1-A1-E6;Parent=XP_007893773.1-R1-1-A1
NW_018058795.1	genBlastG	coding_exon	110762	110887	.	-	.	ID=XP_007893773.1-R1-1-A1-E7;Parent=XP_007893773.1-R1-1-A1
NW_018058795.1	genBlastG	coding_exon	110556	110623	.	-	.	ID=XP_007893773.1-R1-1-A1-E8;Parent=XP_007893773.1-R1-1-A1
NW_018079666.1	genBlastG	transcript	2630	17203	-8.133	+	.	ID=XP_007893788.1-R1-1-A1;Name=XP_007893788.1;PID=40.1;Coverage=88.95;Note=PID:40.1-Cover:88.95
NW_018079666.1	genBlastG	coding_exon	2630	2797	.	+	.	ID=XP_007893788.1-R1-1-A1-E1;Parent=XP_007893788.1-R1-1-A1
NW_018079666.1	genBlastG	coding_exon	2945	3026	.	+	.	ID=XP_007893788.1-R1-1-A1-E2;Parent=XP_007893788.1-R1-1-A1
NW_018079666.1	genBlastG	coding_exon	16130	16265	.	+	.	ID=XP_007893788.1-R1-1-A1-E3;Parent=XP_007893788.1-R1-1-A1
NW_018079666.1	genBlastG	coding_exon	17128	17203	.	+	.	ID=XP_007893788.1-R1-1-A1-E4;Parent=XP_007893788.1-R1-1-A1
NW_018081886.1	genBlastG	transcript	21750	22661	19.23	+	.	ID=XP_007893884.1-R1-1-A1;Name=XP_007893884.1;PID=30.83;Coverage=69.96;Note=PID:30.83-Cover:69.96
NW_018081886.1	genBlastG	coding_exon	21750	22157	.	+	.	ID=XP_007893884.1-R1-1-A1-E1;Parent=XP_007893884.1-R1-1-A1
NW_018081886.1	genBlastG	coding_exon	22599	22661	.	+	.	ID=XP_007893884.1-R1-1-A1-E2;Parent=XP_007893884.1-R1-1-A1
NW_018050477.1	genBlastG	transcript	14779	33060	-55.58	-	.	ID=XP_007894246.1-R1-1-A1;Name=XP_007894246.1;PID=28.43;Coverage=48.19;Note=PID:28.43-Cover:48.19
NW_018050477.1	genBlastG	coding_exon	33021	33060	.	-	.	ID=XP_007894246.1-R1-1-A1-E1;Parent=XP_007894246.1-R1-1-A1
NW_018050477.1	genBlastG	coding_exon	32928	32954	.	-	.	ID=XP_007894246.1-R1-1-A1-E2;Parent=XP_007894246.1-R1-1-A1
NW_018050477.1	genBlastG	coding_exon	31904	32078	.	-	.	ID=XP_007894246.1-R1-1-A1-E3;Parent=XP_007894246.1-R1-1-A1
NW_018050477.1	genBlastG	coding_exon	30296	30504	.	-	.	ID=XP_007894246.1-R1-1-A1-E4;Parent=XP_007894246.1-R1-1-A1
NW_018050477.1	genBlastG	coding_exon	28576	28738	.	-	.	ID=XP_007894246.1-R1-1-A1-E5;Parent=XP_007894246.1-R1-1-A1
NW_018050477.1	genBlastG	coding_exon	27465	27540	.	-	.	ID=XP_007894246.1-R1-1-A1-E6;Parent=XP_007894246.1-R1-1-A1
NW_018050477.1	genBlastG	coding_exon	26524	26619	.	-	.	ID=XP_007894246.1-R1-1-A1-E7;Parent=XP_007894246.1-R1-1-A1
NW_018050477.1	genBlastG	coding_exon	21818	22003	.	-	.	ID=XP_007894246.1-R1-1-A1-E8;Parent=XP_007894246.1-R1-1-A1
NW_018050477.1	genBlastG	coding_exon	15625	16142	.	-	.	ID=XP_007894246.1-R1-1-A1-E9;Parent=XP_007894246.1-R1-1-A1
NW_018050477.1	genBlastG	coding_exon	15001	15040	.	-	.	ID=XP_007894246.1-R1-1-A1-E10;Parent=XP_007894246.1-R1-1-A1
NW_018050477.1	genBlastG	coding_exon	14779	14970	.	-	.	ID=XP_007894246.1-R1-1-A1-E11;Parent=XP_007894246.1-R1-1-A1
NW_018038800.1	genBlastG	transcript	35704	37006	19.34	+	.	ID=XP_007894277.1-R1-1-A1;Name=XP_007894277.1;PID=34.72;Coverage=81.03;Note=PID:34.72-Cover:81.03
NW_018038800.1	genBlastG	coding_exon	35704	36019	.	+	.	ID=XP_007894277.1-R1-1-A1-E1;Parent=XP_007894277.1-R1-1-A1
NW_018038800.1	genBlastG	coding_exon	36059	36097	.	+	.	ID=XP_007894277.1-R1-1-A1-E2;Parent=XP_007894277.1-R1-1-A1
NW_018038800.1	genBlastG	coding_exon	36885	37006	.	+	.	ID=XP_007894277.1-R1-1-A1-E3;Parent=XP_007894277.1-R1-1-A1
NW_018036001.1	genBlastG	transcript	115060	115888	15.12	-	.	ID=XP_007894278.1-R1-1-A1;Name=XP_007894278.1;PID=30.22;Coverage=89.59;Note=PID:30.22-Cover:89.59
NW_018036001.1	genBlastG	coding_exon	115787	115888	.	-	.	ID=XP_007894278.1-R1-1-A1-E1;Parent=XP_007894278.1-R1-1-A1
NW_018036001.1	genBlastG	coding_exon	115668	115774	.	-	.	ID=XP_007894278.1-R1-1-A1-E2;Parent=XP_007894278.1-R1-1-A1
NW_018036001.1	genBlastG	coding_exon	115536	115606	.	-	.	ID=XP_007894278.1-R1-1-A1-E3;Parent=XP_007894278.1-R1-1-A1
NW_018036001.1	genBlastG	coding_exon	115060	115505	.	-	.	ID=XP_007894278.1-R1-1-A1-E4;Parent=XP_007894278.1-R1-1-A1
NW_018041053.1	genBlastG	transcript	18374	24556	96.11	-	.	ID=XP_007894329.1-R1-1-A1;Name=XP_007894329.1;PID=65.71;Coverage=94.06;Note=PID:65.71-Cover:94.06
NW_018041053.1	genBlastG	coding_exon	24110	24556	.	-	.	ID=XP_007894329.1-R1-1-A1-E1;Parent=XP_007894329.1-R1-1-A1
NW_018041053.1	genBlastG	coding_exon	18374	18784	.	-	.	ID=XP_007894329.1-R1-1-A1-E2;Parent=XP_007894329.1-R1-1-A1
NW_018034464.1	genBlastG	transcript	89403	96941	49.67	+	.	ID=XP_007894331.1-R1-1-A1;Name=XP_007894331.1;PID=70.21;Coverage=95.49;Note=PID:70.21-Cover:95.49
NW_018034464.1	genBlastG	coding_exon	89403	89466	.	+	.	ID=XP_007894331.1-R1-1-A1-E1;Parent=XP_007894331.1-R1-1-A1
NW_018034464.1	genBlastG	coding_exon	94437	94604	.	+	.	ID=XP_007894331.1-R1-1-A1-E2;Parent=XP_007894331.1-R1-1-A1
NW_018034464.1	genBlastG	coding_exon	96790	96941	.	+	.	ID=XP_007894331.1-R1-1-A1-E3;Parent=XP_007894331.1-R1-1-A1
NW_018064297.1	genBlastG	transcript	253069	259194	249.3	+	.	ID=XP_007894439.1-R1-1-A1;Name=XP_007894439.1;PID=48.28;Coverage=95.34;Note=PID:48.28-Cover:95.34
NW_018064297.1	genBlastG	coding_exon	253069	253599	.	+	.	ID=XP_007894439.1-R1-1-A1-E1;Parent=XP_007894439.1-R1-1-A1
NW_018064297.1	genBlastG	coding_exon	253633	254848	.	+	.	ID=XP_007894439.1-R1-1-A1-E2;Parent=XP_007894439.1-R1-1-A1
NW_018064297.1	genBlastG	coding_exon	254885	255585	.	+	.	ID=XP_007894439.1-R1-1-A1-E3;Parent=XP_007894439.1-R1-1-A1
NW_018064297.1	genBlastG	coding_exon	255731	255883	.	+	.	ID=XP_007894439.1-R1-1-A1-E4;Parent=XP_007894439.1-R1-1-A1
NW_018064297.1	genBlastG	coding_exon	258481	259194	.	+	.	ID=XP_007894439.1-R1-1-A1-E5;Parent=XP_007894439.1-R1-1-A1
NW_018027747.1	genBlastG	transcript	173560	173768	18.5	+	.	ID=XP_007894577.1-R1-1-A1;Name=XP_007894577.1;PID=34.43;Coverage=49.15;Note=PID:34.43-Cover:49.15
NW_018027747.1	genBlastG	coding_exon	173560	173651	.	+	.	ID=XP_007894577.1-R1-1-A1-E1;Parent=XP_007894577.1-R1-1-A1
NW_018027747.1	genBlastG	coding_exon	173684	173768	.	+	.	ID=XP_007894577.1-R1-1-A1-E2;Parent=XP_007894577.1-R1-1-A1
NW_018047955.1	genBlastG	transcript	43313	47018	58.47	-	.	ID=XP_007894674.1-R1-1-A1;Name=XP_007894674.1;PID=45.17;Coverage=88.46;Note=PID:45.17-Cover:88.46
NW_018047955.1	genBlastG	coding_exon	46872	47018	.	-	.	ID=XP_007894674.1-R1-1-A1-E1;Parent=XP_007894674.1-R1-1-A1
NW_018047955.1	genBlastG	coding_exon	43313	43858	.	-	.	ID=XP_007894674.1-R1-1-A1-E2;Parent=XP_007894674.1-R1-1-A1
NW_018035932.1	genBlastG	transcript	146976	148667	30.49	-	.	ID=XP_007894697.1-R1-1-A1;Name=XP_007894697.1;PID=34.98;Coverage=56.3;Note=PID:34.98-Cover:56.3
NW_018035932.1	genBlastG	coding_exon	148452	148667	.	-	.	ID=XP_007894697.1-R1-1-A1-E1;Parent=XP_007894697.1-R1-1-A1
NW_018035932.1	genBlastG	coding_exon	147887	148050	.	-	.	ID=XP_007894697.1-R1-1-A1-E2;Parent=XP_007894697.1-R1-1-A1
NW_018035932.1	genBlastG	coding_exon	146976	147027	.	-	.	ID=XP_007894697.1-R1-1-A1-E3;Parent=XP_007894697.1-R1-1-A1
NW_018046333.1	genBlastG	transcript	37940	39988	31.96	+	.	ID=XP_007894710.1-R1-1-A1;Name=XP_007894710.1;PID=41.04;Coverage=100;Note=PID:41.04-Cover:100
NW_018046333.1	genBlastG	coding_exon	37940	38134	.	+	.	ID=XP_007894710.1-R1-1-A1-E1;Parent=XP_007894710.1-R1-1-A1
NW_018046333.1	genBlastG	coding_exon	38153	38268	.	+	.	ID=XP_007894710.1-R1-1-A1-E2;Parent=XP_007894710.1-R1-1-A1
NW_018046333.1	genBlastG	coding_exon	39721	39988	.	+	.	ID=XP_007894710.1-R1-1-A1-E3;Parent=XP_007894710.1-R1-1-A1
NW_018038060.1	genBlastG	transcript	3523	5559	11.53	+	.	ID=XP_007894838.1-R1-1-A1;Name=XP_007894838.1;PID=26.98;Coverage=39.81;Note=PID:26.98-Cover:39.81
NW_018038060.1	genBlastG	coding_exon	3523	3598	.	+	.	ID=XP_007894838.1-R1-1-A1-E1;Parent=XP_007894838.1-R1-1-A1
NW_018038060.1	genBlastG	coding_exon	5387	5559	.	+	.	ID=XP_007894838.1-R1-1-A1-E2;Parent=XP_007894838.1-R1-1-A1
NW_018039431.1	genBlastG	transcript	76549	78952	25.2	+	.	ID=XP_007895032.1-R1-1-A1;Name=XP_007895032.1;PID=26.87;Coverage=72.62;Note=PID:26.87-Cover:72.62
NW_018039431.1	genBlastG	coding_exon	76549	76629	.	+	.	ID=XP_007895032.1-R1-1-A1-E1;Parent=XP_007895032.1-R1-1-A1
NW_018039431.1	genBlastG	coding_exon	77437	77470	.	+	.	ID=XP_007895032.1-R1-1-A1-E2;Parent=XP_007895032.1-R1-1-A1
NW_018039431.1	genBlastG	coding_exon	77498	78242	.	+	.	ID=XP_007895032.1-R1-1-A1-E3;Parent=XP_007895032.1-R1-1-A1
NW_018039431.1	genBlastG	coding_exon	78736	78952	.	+	.	ID=XP_007895032.1-R1-1-A1-E4;Parent=XP_007895032.1-R1-1-A1
NW_018035019.1	genBlastG	transcript	96542	107618	55.24	+	.	ID=XP_007895101.1-R1-1-A1;Name=XP_007895101.1;PID=54.05;Coverage=83.27;Note=PID:54.05-Cover:83.27
NW_018035019.1	genBlastG	coding_exon	96542	96700	.	+	.	ID=XP_007895101.1-R1-1-A1-E1;Parent=XP_007895101.1-R1-1-A1
NW_018035019.1	genBlastG	coding_exon	100636	100828	.	+	.	ID=XP_007895101.1-R1-1-A1-E2;Parent=XP_007895101.1-R1-1-A1
NW_018035019.1	genBlastG	coding_exon	104177	104296	.	+	.	ID=XP_007895101.1-R1-1-A1-E3;Parent=XP_007895101.1-R1-1-A1
NW_018035019.1	genBlastG	coding_exon	107446	107618	.	+	.	ID=XP_007895101.1-R1-1-A1-E4;Parent=XP_007895101.1-R1-1-A1
NW_018040691.1	genBlastG	transcript	111152	111379	14.65	+	.	ID=XP_007895115.1-R1-1-A1;Name=XP_007895115.1;PID=33.33;Coverage=88.24;Note=PID:33.33-Cover:88.24
NW_018040691.1	genBlastG	coding_exon	111152	111379	.	+	.	ID=XP_007895115.1-R1-1-A1-E1;Parent=XP_007895115.1-R1-1-A1
NW_018046251.1	genBlastG	transcript	27170	27871	26	+	.	ID=XP_007895189.1-R1-1-A1;Name=XP_007895189.1;PID=50.82;Coverage=68.91;Note=PID:50.82-Cover:68.91
NW_018046251.1	genBlastG	coding_exon	27170	27184	.	+	.	ID=XP_007895189.1-R1-1-A1-E1;Parent=XP_007895189.1-R1-1-A1
NW_018046251.1	genBlastG	coding_exon	27638	27871	.	+	.	ID=XP_007895189.1-R1-1-A1-E2;Parent=XP_007895189.1-R1-1-A1
NW_018056696.1	genBlastG	transcript	10955	25704	127	-	.	ID=XP_007895246.1-R1-1-A1;Name=XP_007895246.1;PID=40;Coverage=90.15;Note=PID:40-Cover:90.15
NW_018056696.1	genBlastG	coding_exon	24004	25704	.	-	.	ID=XP_007895246.1-R1-1-A1-E1;Parent=XP_007895246.1-R1-1-A1
NW_018056696.1	genBlastG	coding_exon	11120	11149	.	-	.	ID=XP_007895246.1-R1-1-A1-E2;Parent=XP_007895246.1-R1-1-A1
NW_018056696.1	genBlastG	coding_exon	10955	11038	.	-	.	ID=XP_007895246.1-R1-1-A1-E3;Parent=XP_007895246.1-R1-1-A1
NW_018054427.1	genBlastG	transcript	2153	9249	15.64	-	.	ID=XP_007895357.1-R1-1-A1;Name=XP_007895357.1;PID=34.71;Coverage=82.03;Note=PID:34.71-Cover:82.03
NW_018054427.1	genBlastG	coding_exon	9207	9249	.	-	.	ID=XP_007895357.1-R1-1-A1-E1;Parent=XP_007895357.1-R1-1-A1
NW_018054427.1	genBlastG	coding_exon	8778	8992	.	-	.	ID=XP_007895357.1-R1-1-A1-E2;Parent=XP_007895357.1-R1-1-A1
NW_018054427.1	genBlastG	coding_exon	2699	2865	.	-	.	ID=XP_007895357.1-R1-1-A1-E3;Parent=XP_007895357.1-R1-1-A1
NW_018054427.1	genBlastG	coding_exon	2417	2483	.	-	.	ID=XP_007895357.1-R1-1-A1-E4;Parent=XP_007895357.1-R1-1-A1
NW_018054427.1	genBlastG	coding_exon	2153	2389	.	-	.	ID=XP_007895357.1-R1-1-A1-E5;Parent=XP_007895357.1-R1-1-A1
NW_018028022.1	genBlastG	transcript	31273	47542	44.91	+	.	ID=XP_007895562.1-R1-1-A1;Name=XP_007895562.1;PID=60.39;Coverage=83.12;Note=PID:60.39-Cover:83.12
NW_018028022.1	genBlastG	coding_exon	31273	31293	.	+	.	ID=XP_007895562.1-R1-1-A1-E1;Parent=XP_007895562.1-R1-1-A1
NW_018028022.1	genBlastG	coding_exon	31933	32069	.	+	.	ID=XP_007895562.1-R1-1-A1-E2;Parent=XP_007895562.1-R1-1-A1
NW_018028022.1	genBlastG	coding_exon	47314	47542	.	+	.	ID=XP_007895562.1-R1-1-A1-E3;Parent=XP_007895562.1-R1-1-A1
NW_018034692.1	genBlastG	transcript	141067	143365	22.54	-	.	ID=XP_007895607.1-R1-1-A1;Name=XP_007895607.1;PID=31.68;Coverage=74.4;Note=PID:31.68-Cover:74.4
NW_018034692.1	genBlastG	coding_exon	143283	143365	.	-	.	ID=XP_007895607.1-R1-1-A1-E1;Parent=XP_007895607.1-R1-1-A1
NW_018034692.1	genBlastG	coding_exon	142569	142792	.	-	.	ID=XP_007895607.1-R1-1-A1-E2;Parent=XP_007895607.1-R1-1-A1
NW_018034692.1	genBlastG	coding_exon	142445	142535	.	-	.	ID=XP_007895607.1-R1-1-A1-E3;Parent=XP_007895607.1-R1-1-A1
NW_018034692.1	genBlastG	coding_exon	142359	142417	.	-	.	ID=XP_007895607.1-R1-1-A1-E4;Parent=XP_007895607.1-R1-1-A1
NW_018034692.1	genBlastG	coding_exon	141502	141635	.	-	.	ID=XP_007895607.1-R1-1-A1-E5;Parent=XP_007895607.1-R1-1-A1
NW_018034692.1	genBlastG	coding_exon	141310	141462	.	-	.	ID=XP_007895607.1-R1-1-A1-E6;Parent=XP_007895607.1-R1-1-A1
NW_018034692.1	genBlastG	coding_exon	141267	141288	.	-	.	ID=XP_007895607.1-R1-1-A1-E7;Parent=XP_007895607.1-R1-1-A1
NW_018034692.1	genBlastG	coding_exon	141067	141227	.	-	.	ID=XP_007895607.1-R1-1-A1-E8;Parent=XP_007895607.1-R1-1-A1
NW_018027479.1	genBlastG	transcript	2364	2780	15	+	.	ID=XP_007895874.1-R1-2-A1;Name=XP_007895874.1;PID=27.46;Coverage=100;Note=PID:27.46-Cover:100
NW_018027479.1	genBlastG	coding_exon	2364	2780	.	+	.	ID=XP_007895874.1-R1-2-A1-E1;Parent=XP_007895874.1-R1-2-A1
NW_018036795.1	genBlastG	transcript	99374	100352	20.33	+	.	ID=XP_007895920.1-R1-1-A1;Name=XP_007895920.1;PID=34.65;Coverage=75.76;Note=PID:34.65-Cover:75.76
NW_018036795.1	genBlastG	coding_exon	99374	99449	.	+	.	ID=XP_007895920.1-R1-1-A1-E1;Parent=XP_007895920.1-R1-1-A1
NW_018036795.1	genBlastG	coding_exon	99722	100094	.	+	.	ID=XP_007895920.1-R1-1-A1-E2;Parent=XP_007895920.1-R1-1-A1
NW_018036795.1	genBlastG	coding_exon	100238	100259	.	+	.	ID=XP_007895920.1-R1-1-A1-E3;Parent=XP_007895920.1-R1-1-A1
NW_018036795.1	genBlastG	coding_exon	100296	100352	.	+	.	ID=XP_007895920.1-R1-1-A1-E4;Parent=XP_007895920.1-R1-1-A1
NW_018031398.1	genBlastG	transcript	16831	17416	18	+	.	ID=XP_007896007.1-R1-1-A1;Name=XP_007896007.1;PID=39.17;Coverage=79.63;Note=PID:39.17-Cover:79.63
NW_018031398.1	genBlastG	coding_exon	16831	16893	.	+	.	ID=XP_007896007.1-R1-1-A1-E1;Parent=XP_007896007.1-R1-1-A1
NW_018031398.1	genBlastG	coding_exon	17219	17416	.	+	.	ID=XP_007896007.1-R1-1-A1-E2;Parent=XP_007896007.1-R1-1-A1
NW_018031398.1	genBlastG	transcript	31209	31794	18	+	.	ID=XP_007896007.1-R1-2-A1;Name=XP_007896007.1;PID=39.17;Coverage=79.63;Note=PID:39.17-Cover:79.63
NW_018031398.1	genBlastG	coding_exon	31209	31271	.	+	.	ID=XP_007896007.1-R1-2-A1-E1;Parent=XP_007896007.1-R1-2-A1
NW_018031398.1	genBlastG	coding_exon	31597	31794	.	+	.	ID=XP_007896007.1-R1-2-A1-E2;Parent=XP_007896007.1-R1-2-A1
NW_018031398.1	genBlastG	transcript	45587	46172	18	+	.	ID=XP_007896007.1-R1-3-A1;Name=XP_007896007.1;PID=39.17;Coverage=79.63;Note=PID:39.17-Cover:79.63
NW_018031398.1	genBlastG	coding_exon	45587	45649	.	+	.	ID=XP_007896007.1-R1-3-A1-E1;Parent=XP_007896007.1-R1-3-A1
NW_018031398.1	genBlastG	coding_exon	45975	46172	.	+	.	ID=XP_007896007.1-R1-3-A1-E2;Parent=XP_007896007.1-R1-3-A1
NW_018069562.1	genBlastG	transcript	19288	27265	40.45	+	.	ID=XP_007896060.1-R1-1-A1;Name=XP_007896060.1;PID=35.32;Coverage=95.76;Note=PID:35.32-Cover:95.76
NW_018069562.1	genBlastG	coding_exon	19288	19447	.	+	.	ID=XP_007896060.1-R1-1-A1-E1;Parent=XP_007896060.1-R1-1-A1
NW_018069562.1	genBlastG	coding_exon	19969	20107	.	+	.	ID=XP_007896060.1-R1-1-A1-E2;Parent=XP_007896060.1-R1-1-A1
NW_018069562.1	genBlastG	coding_exon	22474	22769	.	+	.	ID=XP_007896060.1-R1-1-A1-E3;Parent=XP_007896060.1-R1-1-A1
NW_018069562.1	genBlastG	coding_exon	25891	26051	.	+	.	ID=XP_007896060.1-R1-1-A1-E4;Parent=XP_007896060.1-R1-1-A1
NW_018069562.1	genBlastG	coding_exon	26091	26125	.	+	.	ID=XP_007896060.1-R1-1-A1-E5;Parent=XP_007896060.1-R1-1-A1
NW_018069562.1	genBlastG	coding_exon	26923	26978	.	+	.	ID=XP_007896060.1-R1-1-A1-E6;Parent=XP_007896060.1-R1-1-A1
NW_018069562.1	genBlastG	coding_exon	27027	27265	.	+	.	ID=XP_007896060.1-R1-1-A1-E7;Parent=XP_007896060.1-R1-1-A1
NW_018047738.1	genBlastG	transcript	6501	19120	28.53	-	.	ID=XP_007896177.1-R1-1-A1;Name=XP_007896177.1;PID=37.66;Coverage=60.96;Note=PID:37.66-Cover:60.96
NW_018047738.1	genBlastG	coding_exon	19009	19120	.	-	.	ID=XP_007896177.1-R1-1-A1-E1;Parent=XP_007896177.1-R1-1-A1
NW_018047738.1	genBlastG	coding_exon	13805	13866	.	-	.	ID=XP_007896177.1-R1-1-A1-E2;Parent=XP_007896177.1-R1-1-A1
NW_018047738.1	genBlastG	coding_exon	7070	7144	.	-	.	ID=XP_007896177.1-R1-1-A1-E3;Parent=XP_007896177.1-R1-1-A1
NW_018047738.1	genBlastG	coding_exon	6906	6968	.	-	.	ID=XP_007896177.1-R1-1-A1-E4;Parent=XP_007896177.1-R1-1-A1
NW_018047738.1	genBlastG	coding_exon	6501	6725	.	-	.	ID=XP_007896177.1-R1-1-A1-E5;Parent=XP_007896177.1-R1-1-A1
NW_018058315.1	genBlastG	transcript	9279	10481	45.5	+	.	ID=XP_007896356.1-R1-1-A1;Name=XP_007896356.1;PID=73.33;Coverage=99.25;Note=PID:73.33-Cover:99.25
NW_018058315.1	genBlastG	coding_exon	9279	9639	.	+	.	ID=XP_007896356.1-R1-1-A1-E1;Parent=XP_007896356.1-R1-1-A1
NW_018058315.1	genBlastG	coding_exon	10444	10481	.	+	.	ID=XP_007896356.1-R1-1-A1-E2;Parent=XP_007896356.1-R1-1-A1
NW_018028921.1	genBlastG	transcript	256248	257223	45.5	-	.	ID=XP_007896356.1-R1-2-A1;Name=XP_007896356.1;PID=70.37;Coverage=93.98;Note=PID:70.37-Cover:93.98
NW_018028921.1	genBlastG	coding_exon	256863	257223	.	-	.	ID=XP_007896356.1-R1-2-A1-E1;Parent=XP_007896356.1-R1-2-A1
NW_018028921.1	genBlastG	coding_exon	256248	256264	.	-	.	ID=XP_007896356.1-R1-2-A1-E2;Parent=XP_007896356.1-R1-2-A1
NW_018036532.1	genBlastG	transcript	135262	149874	49.4	-	.	ID=XP_007896359.1-R1-1-A1;Name=XP_007896359.1;PID=67.21;Coverage=100;Note=PID:67.21-Cover:100
NW_018036532.1	genBlastG	coding_exon	149765	149874	.	-	.	ID=XP_007896359.1-R1-1-A1-E1;Parent=XP_007896359.1-R1-1-A1
NW_018036532.1	genBlastG	coding_exon	149252	149360	.	-	.	ID=XP_007896359.1-R1-1-A1-E2;Parent=XP_007896359.1-R1-1-A1
NW_018036532.1	genBlastG	coding_exon	144050	144169	.	-	.	ID=XP_007896359.1-R1-1-A1-E3;Parent=XP_007896359.1-R1-1-A1
NW_018036532.1	genBlastG	coding_exon	135443	135521	.	-	.	ID=XP_007896359.1-R1-1-A1-E4;Parent=XP_007896359.1-R1-1-A1
NW_018036532.1	genBlastG	coding_exon	135262	135353	.	-	.	ID=XP_007896359.1-R1-1-A1-E5;Parent=XP_007896359.1-R1-1-A1
NW_018030294.1	genBlastG	transcript	240016	241284	18.75	-	.	ID=XP_007896534.1-R1-1-A1;Name=XP_007896534.1;PID=43.79;Coverage=66.21;Note=PID:43.79-Cover:66.21
NW_018030294.1	genBlastG	coding_exon	241258	241284	.	-	.	ID=XP_007896534.1-R1-1-A1-E1;Parent=XP_007896534.1-R1-1-A1
NW_018030294.1	genBlastG	coding_exon	241049	241073	.	-	.	ID=XP_007896534.1-R1-1-A1-E2;Parent=XP_007896534.1-R1-1-A1
NW_018030294.1	genBlastG	coding_exon	240816	241003	.	-	.	ID=XP_007896534.1-R1-1-A1-E3;Parent=XP_007896534.1-R1-1-A1
NW_018030294.1	genBlastG	coding_exon	240071	240090	.	-	.	ID=XP_007896534.1-R1-1-A1-E4;Parent=XP_007896534.1-R1-1-A1
NW_018030294.1	genBlastG	coding_exon	240016	240046	.	-	.	ID=XP_007896534.1-R1-1-A1-E5;Parent=XP_007896534.1-R1-1-A1
NW_018029087.1	genBlastG	transcript	11896	12273	52.5	+	.	ID=XP_007896650.1-R1-1-A1;Name=XP_007896650.1;PID=54.31;Coverage=65.45;Note=PID:54.31-Cover:65.45
NW_018029087.1	genBlastG	coding_exon	11896	12273	.	+	.	ID=XP_007896650.1-R1-1-A1-E1;Parent=XP_007896650.1-R1-1-A1
NW_018037853.1	genBlastG	transcript	3290	9447	49.83	+	.	ID=XP_007896769.1-R1-1-A1;Name=XP_007896769.1;PID=44.48;Coverage=67;Note=PID:44.48-Cover:67
NW_018037853.1	genBlastG	coding_exon	3290	3320	.	+	.	ID=XP_007896769.1-R1-1-A1-E1;Parent=XP_007896769.1-R1-1-A1
NW_018037853.1	genBlastG	coding_exon	3378	3428	.	+	.	ID=XP_007896769.1-R1-1-A1-E2;Parent=XP_007896769.1-R1-1-A1
NW_018037853.1	genBlastG	coding_exon	4148	4299	.	+	.	ID=XP_007896769.1-R1-1-A1-E3;Parent=XP_007896769.1-R1-1-A1
NW_018037853.1	genBlastG	coding_exon	6889	7005	.	+	.	ID=XP_007896769.1-R1-1-A1-E4;Parent=XP_007896769.1-R1-1-A1
NW_018037853.1	genBlastG	coding_exon	9193	9447	.	+	.	ID=XP_007896769.1-R1-1-A1-E5;Parent=XP_007896769.1-R1-1-A1
NW_018039252.1	genBlastG	transcript	91260	93754	89.89	+	.	ID=XP_007896844.1-R1-1-A1;Name=XP_007896844.1;PID=39.02;Coverage=100;Note=PID:39.02-Cover:100
NW_018039252.1	genBlastG	coding_exon	91260	91287	.	+	.	ID=XP_007896844.1-R1-1-A1-E1;Parent=XP_007896844.1-R1-1-A1
NW_018039252.1	genBlastG	coding_exon	91919	92022	.	+	.	ID=XP_007896844.1-R1-1-A1-E2;Parent=XP_007896844.1-R1-1-A1
NW_018039252.1	genBlastG	coding_exon	92044	92072	.	+	.	ID=XP_007896844.1-R1-1-A1-E3;Parent=XP_007896844.1-R1-1-A1
NW_018039252.1	genBlastG	coding_exon	92094	92122	.	+	.	ID=XP_007896844.1-R1-1-A1-E4;Parent=XP_007896844.1-R1-1-A1
NW_018039252.1	genBlastG	coding_exon	92144	92966	.	+	.	ID=XP_007896844.1-R1-1-A1-E5;Parent=XP_007896844.1-R1-1-A1
NW_018039252.1	genBlastG	coding_exon	93358	93754	.	+	.	ID=XP_007896844.1-R1-1-A1-E6;Parent=XP_007896844.1-R1-1-A1
NW_018030802.1	genBlastG	transcript	129049	133919	26.65	-	.	ID=XP_007896875.1-R1-1-A1;Name=XP_007896875.1;PID=31.07;Coverage=66.67;Note=PID:31.07-Cover:66.67
NW_018030802.1	genBlastG	coding_exon	133831	133919	.	-	.	ID=XP_007896875.1-R1-1-A1-E1;Parent=XP_007896875.1-R1-1-A1
NW_018030802.1	genBlastG	coding_exon	133194	133396	.	-	.	ID=XP_007896875.1-R1-1-A1-E2;Parent=XP_007896875.1-R1-1-A1
NW_018030802.1	genBlastG	coding_exon	130120	130123	.	-	.	ID=XP_007896875.1-R1-1-A1-E3;Parent=XP_007896875.1-R1-1-A1
NW_018030802.1	genBlastG	coding_exon	129998	130089	.	-	.	ID=XP_007896875.1-R1-1-A1-E4;Parent=XP_007896875.1-R1-1-A1
NW_018030802.1	genBlastG	coding_exon	129159	129209	.	-	.	ID=XP_007896875.1-R1-1-A1-E5;Parent=XP_007896875.1-R1-1-A1
NW_018030802.1	genBlastG	coding_exon	129049	129128	.	-	.	ID=XP_007896875.1-R1-1-A1-E6;Parent=XP_007896875.1-R1-1-A1
NW_018050609.1	genBlastG	transcript	1283	2944	14.5	+	.	ID=XP_007896880.1-R1-1-A1;Name=XP_007896880.1;PID=38.26;Coverage=93.68;Note=PID:38.26-Cover:93.68
NW_018050609.1	genBlastG	coding_exon	1283	1350	.	+	.	ID=XP_007896880.1-R1-1-A1-E1;Parent=XP_007896880.1-R1-1-A1
NW_018050609.1	genBlastG	coding_exon	2134	2295	.	+	.	ID=XP_007896880.1-R1-1-A1-E2;Parent=XP_007896880.1-R1-1-A1
NW_018050609.1	genBlastG	coding_exon	2905	2944	.	+	.	ID=XP_007896880.1-R1-1-A1-E3;Parent=XP_007896880.1-R1-1-A1
NW_018033068.1	genBlastG	transcript	200509	201016	20.76	-	.	ID=XP_007896881.1-R1-1-A1;Name=XP_007896881.1;PID=35.24;Coverage=72.14;Note=PID:35.24-Cover:72.14
NW_018033068.1	genBlastG	coding_exon	200956	201016	.	-	.	ID=XP_007896881.1-R1-1-A1-E1;Parent=XP_007896881.1-R1-1-A1
NW_018033068.1	genBlastG	coding_exon	200509	200885	.	-	.	ID=XP_007896881.1-R1-1-A1-E2;Parent=XP_007896881.1-R1-1-A1
NW_018035629.1	genBlastG	transcript	3302	5206	15.14	+	.	ID=XP_007897000.1-R1-1-A1;Name=XP_007897000.1;PID=32.81;Coverage=95.3;Note=PID:32.81-Cover:95.3
NW_018035629.1	genBlastG	coding_exon	3302	3382	.	+	.	ID=XP_007897000.1-R1-1-A1-E1;Parent=XP_007897000.1-R1-1-A1
NW_018035629.1	genBlastG	coding_exon	3933	4087	.	+	.	ID=XP_007897000.1-R1-1-A1-E2;Parent=XP_007897000.1-R1-1-A1
NW_018035629.1	genBlastG	coding_exon	4112	4139	.	+	.	ID=XP_007897000.1-R1-1-A1-E3;Parent=XP_007897000.1-R1-1-A1
NW_018035629.1	genBlastG	coding_exon	5042	5206	.	+	.	ID=XP_007897000.1-R1-1-A1-E4;Parent=XP_007897000.1-R1-1-A1
NW_018049823.1	genBlastG	transcript	1937	3143	13.5	-	.	ID=XP_007897031.1-R1-1-A1;Name=XP_007897031.1;PID=39.08;Coverage=89.77;Note=PID:39.08-Cover:89.77
NW_018049823.1	genBlastG	coding_exon	2720	3143	.	-	.	ID=XP_007897031.1-R1-1-A1-E1;Parent=XP_007897031.1-R1-1-A1
NW_018049823.1	genBlastG	coding_exon	1937	2094	.	-	.	ID=XP_007897031.1-R1-1-A1-E2;Parent=XP_007897031.1-R1-1-A1
NW_018037731.1	genBlastG	transcript	185658	192949	52.71	+	.	ID=XP_007897041.1-R1-1-A1;Name=XP_007897041.1;PID=34.36;Coverage=100;Note=PID:34.36-Cover:100
NW_018037731.1	genBlastG	coding_exon	185658	186044	.	+	.	ID=XP_007897041.1-R1-1-A1-E1;Parent=XP_007897041.1-R1-1-A1
NW_018037731.1	genBlastG	coding_exon	189852	189898	.	+	.	ID=XP_007897041.1-R1-1-A1-E2;Parent=XP_007897041.1-R1-1-A1
NW_018037731.1	genBlastG	coding_exon	192178	192949	.	+	.	ID=XP_007897041.1-R1-1-A1-E3;Parent=XP_007897041.1-R1-1-A1
NW_018054866.1	genBlastG	transcript	10186	13183	228.3	+	.	ID=XP_007897147.1-R1-1-A1;Name=XP_007897147.1;PID=44.99;Coverage=88.31;Note=PID:44.99-Cover:88.31
NW_018054866.1	genBlastG	coding_exon	10186	10654	.	+	.	ID=XP_007897147.1-R1-1-A1-E1;Parent=XP_007897147.1-R1-1-A1
NW_018054866.1	genBlastG	coding_exon	10686	11033	.	+	.	ID=XP_007897147.1-R1-1-A1-E2;Parent=XP_007897147.1-R1-1-A1
NW_018054866.1	genBlastG	coding_exon	11070	11332	.	+	.	ID=XP_007897147.1-R1-1-A1-E3;Parent=XP_007897147.1-R1-1-A1
NW_018054866.1	genBlastG	coding_exon	11362	11815	.	+	.	ID=XP_007897147.1-R1-1-A1-E4;Parent=XP_007897147.1-R1-1-A1
NW_018054866.1	genBlastG	coding_exon	11838	13183	.	+	.	ID=XP_007897147.1-R1-1-A1-E5;Parent=XP_007897147.1-R1-1-A1
NW_018071506.1	genBlastG	transcript	150703	159514	34.1	-	.	ID=XP_007897193.1-R1-1-A1;Name=XP_007897193.1;PID=43.24;Coverage=95.12;Note=PID:43.24-Cover:95.12
NW_018071506.1	genBlastG	coding_exon	159358	159514	.	-	.	ID=XP_007897193.1-R1-1-A1-E1;Parent=XP_007897193.1-R1-1-A1
NW_018071506.1	genBlastG	coding_exon	159048	159311	.	-	.	ID=XP_007897193.1-R1-1-A1-E2;Parent=XP_007897193.1-R1-1-A1
NW_018071506.1	genBlastG	coding_exon	150703	150869	.	-	.	ID=XP_007897193.1-R1-1-A1-E3;Parent=XP_007897193.1-R1-1-A1
NW_018075227.1	genBlastG	transcript	10571	11597	23.25	+	.	ID=XP_007897389.1-R1-1-A1;Name=XP_007897389.1;PID=42.42;Coverage=88.51;Note=PID:42.42-Cover:88.51
NW_018075227.1	genBlastG	coding_exon	10571	10899	.	+	.	ID=XP_007897389.1-R1-1-A1-E1;Parent=XP_007897389.1-R1-1-A1
NW_018075227.1	genBlastG	coding_exon	11531	11597	.	+	.	ID=XP_007897389.1-R1-1-A1-E2;Parent=XP_007897389.1-R1-1-A1
NW_018037319.1	genBlastG	transcript	97841	98861	14	+	.	ID=XP_007897410.1-R1-1-A1;Name=XP_007897410.1;PID=71.43;Coverage=100;Note=PID:71.43-Cover:100
NW_018037319.1	genBlastG	coding_exon	97841	97853	.	+	.	ID=XP_007897410.1-R1-1-A1-E1;Parent=XP_007897410.1-R1-1-A1
NW_018037319.1	genBlastG	coding_exon	98746	98861	.	+	.	ID=XP_007897410.1-R1-1-A1-E2;Parent=XP_007897410.1-R1-1-A1
NW_018069600.1	genBlastG	transcript	82586	83569	21	+	.	ID=XP_007897433.1-R1-1-A1;Name=XP_007897433.1;PID=53.26;Coverage=87.5;Note=PID:53.26-Cover:87.5
NW_018069600.1	genBlastG	coding_exon	82586	82625	.	+	.	ID=XP_007897433.1-R1-1-A1-E1;Parent=XP_007897433.1-R1-1-A1
NW_018069600.1	genBlastG	coding_exon	83397	83569	.	+	.	ID=XP_007897433.1-R1-1-A1-E2;Parent=XP_007897433.1-R1-1-A1
NW_018059257.1	genBlastG	transcript	185502	187431	74.13	-	.	ID=XP_007897507.1-R1-1-A1;Name=XP_007897507.1;PID=30.96;Coverage=100;Note=PID:30.96-Cover:100
NW_018059257.1	genBlastG	coding_exon	187413	187431	.	-	.	ID=XP_007897507.1-R1-1-A1-E1;Parent=XP_007897507.1-R1-1-A1
NW_018059257.1	genBlastG	coding_exon	186588	187301	.	-	.	ID=XP_007897507.1-R1-1-A1-E2;Parent=XP_007897507.1-R1-1-A1
NW_018059257.1	genBlastG	coding_exon	185502	185812	.	-	.	ID=XP_007897507.1-R1-1-A1-E3;Parent=XP_007897507.1-R1-1-A1
NW_018060610.1	genBlastG	transcript	230337	241133	30.37	-	.	ID=XP_007897518.1-R1-1-A1;Name=XP_007897518.1;PID=30.19;Coverage=57.54;Note=PID:30.19-Cover:57.54
NW_018060610.1	genBlastG	coding_exon	240902	241133	.	-	.	ID=XP_007897518.1-R1-1-A1-E1;Parent=XP_007897518.1-R1-1-A1
NW_018060610.1	genBlastG	coding_exon	237141	237260	.	-	.	ID=XP_007897518.1-R1-1-A1-E2;Parent=XP_007897518.1-R1-1-A1
NW_018060610.1	genBlastG	coding_exon	231380	231574	.	-	.	ID=XP_007897518.1-R1-1-A1-E3;Parent=XP_007897518.1-R1-1-A1
NW_018060610.1	genBlastG	coding_exon	230424	230491	.	-	.	ID=XP_007897518.1-R1-1-A1-E4;Parent=XP_007897518.1-R1-1-A1
NW_018060610.1	genBlastG	coding_exon	230337	230399	.	-	.	ID=XP_007897518.1-R1-1-A1-E5;Parent=XP_007897518.1-R1-1-A1
NW_018062403.1	genBlastG	transcript	77523	85686	37.6	+	.	ID=XP_007897571.1-R1-1-A1;Name=XP_007897571.1;PID=9.677;Coverage=10.97;Note=PID:9.677-Cover:10.97
NW_018062403.1	genBlastG	coding_exon	77523	77535	.	+	.	ID=XP_007897571.1-R1-1-A1-E1;Parent=XP_007897571.1-R1-1-A1
NW_018062403.1	genBlastG	coding_exon	77551	77618	.	+	.	ID=XP_007897571.1-R1-1-A1-E2;Parent=XP_007897571.1-R1-1-A1
NW_018062403.1	genBlastG	coding_exon	78564	78688	.	+	.	ID=XP_007897571.1-R1-1-A1-E3;Parent=XP_007897571.1-R1-1-A1
NW_018062403.1	genBlastG	coding_exon	84665	84715	.	+	.	ID=XP_007897571.1-R1-1-A1-E4;Parent=XP_007897571.1-R1-1-A1
NW_018062403.1	genBlastG	coding_exon	84771	84875	.	+	.	ID=XP_007897571.1-R1-1-A1-E5;Parent=XP_007897571.1-R1-1-A1
NW_018062403.1	genBlastG	coding_exon	85638	85686	.	+	.	ID=XP_007897571.1-R1-1-A1-E6;Parent=XP_007897571.1-R1-1-A1
NW_018036345.1	genBlastG	transcript	74805	76357	21.2	+	.	ID=XP_007897576.1-R1-1-A1;Name=XP_007897576.1;PID=28.87;Coverage=54.24;Note=PID:28.87-Cover:54.24
NW_018036345.1	genBlastG	coding_exon	74805	74917	.	+	.	ID=XP_007897576.1-R1-1-A1-E1;Parent=XP_007897576.1-R1-1-A1
NW_018036345.1	genBlastG	coding_exon	74963	74983	.	+	.	ID=XP_007897576.1-R1-1-A1-E2;Parent=XP_007897576.1-R1-1-A1
NW_018036345.1	genBlastG	coding_exon	75017	75202	.	+	.	ID=XP_007897576.1-R1-1-A1-E3;Parent=XP_007897576.1-R1-1-A1
NW_018036345.1	genBlastG	coding_exon	75772	75824	.	+	.	ID=XP_007897576.1-R1-1-A1-E4;Parent=XP_007897576.1-R1-1-A1
NW_018036345.1	genBlastG	coding_exon	76272	76309	.	+	.	ID=XP_007897576.1-R1-1-A1-E5;Parent=XP_007897576.1-R1-1-A1
NW_018036345.1	genBlastG	coding_exon	76325	76357	.	+	.	ID=XP_007897576.1-R1-1-A1-E6;Parent=XP_007897576.1-R1-1-A1
NW_018034491.1	genBlastG	transcript	52466	53177	12.5	-	.	ID=XP_007897579.1-R1-1-A1;Name=XP_007897579.1;PID=22.78;Coverage=58.59;Note=PID:22.78-Cover:58.59
NW_018034491.1	genBlastG	coding_exon	53115	53177	.	-	.	ID=XP_007897579.1-R1-1-A1-E1;Parent=XP_007897579.1-R1-1-A1
NW_018034491.1	genBlastG	coding_exon	52466	52804	.	-	.	ID=XP_007897579.1-R1-1-A1-E2;Parent=XP_007897579.1-R1-1-A1
NW_018041382.1	genBlastG	transcript	7356	7763	14.5	-	.	ID=XP_007897702.1-R1-1-A1;Name=XP_007897702.1;PID=47.3;Coverage=94.37;Note=PID:47.3-Cover:94.37
NW_018041382.1	genBlastG	coding_exon	7722	7763	.	-	.	ID=XP_007897702.1-R1-1-A1-E1;Parent=XP_007897702.1-R1-1-A1
NW_018041382.1	genBlastG	coding_exon	7356	7517	.	-	.	ID=XP_007897702.1-R1-1-A1-E2;Parent=XP_007897702.1-R1-1-A1
NW_018029315.1	genBlastG	transcript	1552	19147	104.3	-	.	ID=XP_007897754.1-R1-1-A1;Name=XP_007897754.1;PID=60.34;Coverage=95.05;Note=PID:60.34-Cover:95.05
NW_018029315.1	genBlastG	coding_exon	19027	19147	.	-	.	ID=XP_007897754.1-R1-1-A1-E1;Parent=XP_007897754.1-R1-1-A1
NW_018029315.1	genBlastG	coding_exon	18588	18792	.	-	.	ID=XP_007897754.1-R1-1-A1-E2;Parent=XP_007897754.1-R1-1-A1
NW_018029315.1	genBlastG	coding_exon	13238	13411	.	-	.	ID=XP_007897754.1-R1-1-A1-E3;Parent=XP_007897754.1-R1-1-A1
NW_018029315.1	genBlastG	coding_exon	11593	11714	.	-	.	ID=XP_007897754.1-R1-1-A1-E4;Parent=XP_007897754.1-R1-1-A1
NW_018029315.1	genBlastG	coding_exon	9389	9509	.	-	.	ID=XP_007897754.1-R1-1-A1-E5;Parent=XP_007897754.1-R1-1-A1
NW_018029315.1	genBlastG	coding_exon	7694	7799	.	-	.	ID=XP_007897754.1-R1-1-A1-E6;Parent=XP_007897754.1-R1-1-A1
NW_018029315.1	genBlastG	coding_exon	4644	4742	.	-	.	ID=XP_007897754.1-R1-1-A1-E7;Parent=XP_007897754.1-R1-1-A1
NW_018029315.1	genBlastG	coding_exon	1725	1804	.	-	.	ID=XP_007897754.1-R1-1-A1-E8;Parent=XP_007897754.1-R1-1-A1
NW_018029315.1	genBlastG	coding_exon	1552	1678	.	-	.	ID=XP_007897754.1-R1-1-A1-E9;Parent=XP_007897754.1-R1-1-A1
NW_018040346.1	genBlastG	transcript	4255	6803	24.3	-	.	ID=XP_007897820.1-R1-1-A1;Name=XP_007897820.1;PID=37.89;Coverage=100;Note=PID:37.89-Cover:100
NW_018040346.1	genBlastG	coding_exon	6753	6803	.	-	.	ID=XP_007897820.1-R1-1-A1-E1;Parent=XP_007897820.1-R1-1-A1
NW_018040346.1	genBlastG	coding_exon	5587	5870	.	-	.	ID=XP_007897820.1-R1-1-A1-E2;Parent=XP_007897820.1-R1-1-A1
NW_018040346.1	genBlastG	coding_exon	4255	4564	.	-	.	ID=XP_007897820.1-R1-1-A1-E3;Parent=XP_007897820.1-R1-1-A1
NW_018046320.1	genBlastG	transcript	770	1018	25.5	+	.	ID=XP_007897952.1-R1-1-A1;Name=XP_007897952.1;PID=54;Coverage=88.17;Note=PID:54-Cover:88.17
NW_018046320.1	genBlastG	coding_exon	770	1018	.	+	.	ID=XP_007897952.1-R1-1-A1-E1;Parent=XP_007897952.1-R1-1-A1
NW_018036209.1	genBlastG	transcript	59526	61182	66.63	+	.	ID=XP_007898024.1-R1-1-A1;Name=XP_007898024.1;PID=61.21;Coverage=100;Note=PID:61.21-Cover:100
NW_018036209.1	genBlastG	coding_exon	59526	59869	.	+	.	ID=XP_007898024.1-R1-1-A1-E1;Parent=XP_007898024.1-R1-1-A1
NW_018036209.1	genBlastG	coding_exon	60870	61182	.	+	.	ID=XP_007898024.1-R1-1-A1-E2;Parent=XP_007898024.1-R1-1-A1
NW_018050199.1	genBlastG	transcript	4600	6784	-5.422	+	.	ID=XP_007898089.1-R1-1-A1;Name=XP_007898089.1;PID=15.02;Coverage=23.93;Note=PID:15.02-Cover:23.93
NW_018050199.1	genBlastG	coding_exon	4600	4688	.	+	.	ID=XP_007898089.1-R1-1-A1-E1;Parent=XP_007898089.1-R1-1-A1
NW_018050199.1	genBlastG	coding_exon	4728	4922	.	+	.	ID=XP_007898089.1-R1-1-A1-E2;Parent=XP_007898089.1-R1-1-A1
NW_018050199.1	genBlastG	coding_exon	5019	5054	.	+	.	ID=XP_007898089.1-R1-1-A1-E3;Parent=XP_007898089.1-R1-1-A1
NW_018050199.1	genBlastG	coding_exon	5073	5107	.	+	.	ID=XP_007898089.1-R1-1-A1-E4;Parent=XP_007898089.1-R1-1-A1
NW_018050199.1	genBlastG	coding_exon	5126	5487	.	+	.	ID=XP_007898089.1-R1-1-A1-E5;Parent=XP_007898089.1-R1-1-A1
NW_018050199.1	genBlastG	coding_exon	6263	6784	.	+	.	ID=XP_007898089.1-R1-1-A1-E6;Parent=XP_007898089.1-R1-1-A1
NW_018071330.1	genBlastG	transcript	44954	80561	29.5	-	.	ID=XP_007898131.1-R1-1-A1;Name=XP_007898131.1;PID=19.51;Coverage=28.66;Note=PID:19.51-Cover:28.66
NW_018071330.1	genBlastG	coding_exon	80353	80561	.	-	.	ID=XP_007898131.1-R1-1-A1-E1;Parent=XP_007898131.1-R1-1-A1
NW_018071330.1	genBlastG	coding_exon	63828	63935	.	-	.	ID=XP_007898131.1-R1-1-A1-E2;Parent=XP_007898131.1-R1-1-A1
NW_018071330.1	genBlastG	coding_exon	45830	46052	.	-	.	ID=XP_007898131.1-R1-1-A1-E3;Parent=XP_007898131.1-R1-1-A1
NW_018071330.1	genBlastG	coding_exon	44954	45139	.	-	.	ID=XP_007898131.1-R1-1-A1-E4;Parent=XP_007898131.1-R1-1-A1
NW_018037910.1	genBlastG	transcript	75441	77659	22.1	+	.	ID=XP_007898181.1-R1-1-A1;Name=XP_007898181.1;PID=34.36;Coverage=59.86;Note=PID:34.36-Cover:59.86
NW_018037910.1	genBlastG	coding_exon	75441	75645	.	+	.	ID=XP_007898181.1-R1-1-A1-E1;Parent=XP_007898181.1-R1-1-A1
NW_018037910.1	genBlastG	coding_exon	76444	76558	.	+	.	ID=XP_007898181.1-R1-1-A1-E2;Parent=XP_007898181.1-R1-1-A1
NW_018037910.1	genBlastG	coding_exon	76654	76803	.	+	.	ID=XP_007898181.1-R1-1-A1-E3;Parent=XP_007898181.1-R1-1-A1
NW_018037910.1	genBlastG	coding_exon	77626	77659	.	+	.	ID=XP_007898181.1-R1-1-A1-E4;Parent=XP_007898181.1-R1-1-A1
NW_018062305.1	genBlastG	transcript	679560	681084	68.37	+	.	ID=XP_007898235.1-R1-1-A1;Name=XP_007898235.1;PID=53.15;Coverage=87.5;Note=PID:53.15-Cover:87.5
NW_018062305.1	genBlastG	coding_exon	679560	679879	.	+	.	ID=XP_007898235.1-R1-1-A1-E1;Parent=XP_007898235.1-R1-1-A1
NW_018062305.1	genBlastG	coding_exon	680483	680520	.	+	.	ID=XP_007898235.1-R1-1-A1-E2;Parent=XP_007898235.1-R1-1-A1
NW_018062305.1	genBlastG	coding_exon	680621	681084	.	+	.	ID=XP_007898235.1-R1-1-A1-E3;Parent=XP_007898235.1-R1-1-A1
NW_018034419.1	genBlastG	transcript	176304	177380	29.95	+	.	ID=XP_007898453.1-R1-1-A1;Name=XP_007898453.1;PID=36.18;Coverage=96.33;Note=PID:36.18-Cover:96.33
NW_018034419.1	genBlastG	coding_exon	176304	176326	.	+	.	ID=XP_007898453.1-R1-1-A1-E1;Parent=XP_007898453.1-R1-1-A1
NW_018034419.1	genBlastG	coding_exon	176402	176850	.	+	.	ID=XP_007898453.1-R1-1-A1-E2;Parent=XP_007898453.1-R1-1-A1
NW_018034419.1	genBlastG	coding_exon	177142	177380	.	+	.	ID=XP_007898453.1-R1-1-A1-E3;Parent=XP_007898453.1-R1-1-A1
NW_018065313.1	genBlastG	transcript	60204	67196	80.35	-	.	ID=XP_007898460.1-R1-1-A1;Name=XP_007898460.1;PID=62.37;Coverage=98.91;Note=PID:62.37-Cover:98.91
NW_018065313.1	genBlastG	coding_exon	67167	67196	.	-	.	ID=XP_007898460.1-R1-1-A1-E1;Parent=XP_007898460.1-R1-1-A1
NW_018065313.1	genBlastG	coding_exon	65859	66294	.	-	.	ID=XP_007898460.1-R1-1-A1-E2;Parent=XP_007898460.1-R1-1-A1
NW_018065313.1	genBlastG	coding_exon	62503	62718	.	-	.	ID=XP_007898460.1-R1-1-A1-E3;Parent=XP_007898460.1-R1-1-A1
NW_018065313.1	genBlastG	coding_exon	60204	60337	.	-	.	ID=XP_007898460.1-R1-1-A1-E4;Parent=XP_007898460.1-R1-1-A1
NW_018030603.1	genBlastG	transcript	120950	123126	55.55	-	.	ID=XP_007898503.1-R1-1-A1;Name=XP_007898503.1;PID=18.48;Coverage=28.47;Note=PID:18.48-Cover:28.47
NW_018030603.1	genBlastG	coding_exon	123087	123126	.	-	.	ID=XP_007898503.1-R1-1-A1-E1;Parent=XP_007898503.1-R1-1-A1
NW_018030603.1	genBlastG	coding_exon	121486	122477	.	-	.	ID=XP_007898503.1-R1-1-A1-E2;Parent=XP_007898503.1-R1-1-A1
NW_018030603.1	genBlastG	coding_exon	121063	121105	.	-	.	ID=XP_007898503.1-R1-1-A1-E3;Parent=XP_007898503.1-R1-1-A1
NW_018030603.1	genBlastG	coding_exon	120950	121014	.	-	.	ID=XP_007898503.1-R1-1-A1-E4;Parent=XP_007898503.1-R1-1-A1
NW_018083640.1	genBlastG	transcript	1197	5764	19.04	+	.	ID=XP_007898557.1-R1-1-A1;Name=XP_007898557.1;PID=28.67;Coverage=100;Note=PID:28.67-Cover:100
NW_018083640.1	genBlastG	coding_exon	1197	1546	.	+	.	ID=XP_007898557.1-R1-1-A1-E1;Parent=XP_007898557.1-R1-1-A1
NW_018083640.1	genBlastG	coding_exon	3566	3628	.	+	.	ID=XP_007898557.1-R1-1-A1-E2;Parent=XP_007898557.1-R1-1-A1
NW_018083640.1	genBlastG	coding_exon	3647	4109	.	+	.	ID=XP_007898557.1-R1-1-A1-E3;Parent=XP_007898557.1-R1-1-A1
NW_018083640.1	genBlastG	coding_exon	4676	5764	.	+	.	ID=XP_007898557.1-R1-1-A1-E4;Parent=XP_007898557.1-R1-1-A1
NW_018073669.1	genBlastG	transcript	79770	90746	36.03	+	.	ID=XP_007898803.1-R1-1-A1;Name=XP_007898803.1;PID=54.67;Coverage=93.23;Note=PID:54.67-Cover:93.23
NW_018073669.1	genBlastG	coding_exon	79770	79787	.	+	.	ID=XP_007898803.1-R1-1-A1-E1;Parent=XP_007898803.1-R1-1-A1
NW_018073669.1	genBlastG	coding_exon	79861	79931	.	+	.	ID=XP_007898803.1-R1-1-A1-E2;Parent=XP_007898803.1-R1-1-A1
NW_018073669.1	genBlastG	coding_exon	90461	90746	.	+	.	ID=XP_007898803.1-R1-1-A1-E3;Parent=XP_007898803.1-R1-1-A1
NW_018061020.1	genBlastG	transcript	62503	67110	82.82	+	.	ID=XP_007898806.1-R1-1-A1;Name=XP_007898806.1;PID=57.59;Coverage=94.3;Note=PID:57.59-Cover:94.3
NW_018061020.1	genBlastG	coding_exon	62503	62720	.	+	.	ID=XP_007898806.1-R1-1-A1-E1;Parent=XP_007898806.1-R1-1-A1
NW_018061020.1	genBlastG	coding_exon	62742	63010	.	+	.	ID=XP_007898806.1-R1-1-A1-E2;Parent=XP_007898806.1-R1-1-A1
NW_018061020.1	genBlastG	coding_exon	64301	64443	.	+	.	ID=XP_007898806.1-R1-1-A1-E3;Parent=XP_007898806.1-R1-1-A1
NW_018061020.1	genBlastG	coding_exon	66895	67110	.	+	.	ID=XP_007898806.1-R1-1-A1-E4;Parent=XP_007898806.1-R1-1-A1
NW_018040801.1	genBlastG	transcript	54363	54871	-12.78	-	.	ID=XP_007898911.1-R1-1-A1;Name=XP_007898911.1;PID=42.92;Coverage=71.24;Note=PID:42.92-Cover:71.24
NW_018040801.1	genBlastG	coding_exon	54564	54871	.	-	.	ID=XP_007898911.1-R1-1-A1-E1;Parent=XP_007898911.1-R1-1-A1
NW_018040801.1	genBlastG	coding_exon	54363	54540	.	-	.	ID=XP_007898911.1-R1-1-A1-E2;Parent=XP_007898911.1-R1-1-A1
NW_018069800.1	genBlastG	transcript	253989	254979	122.9	-	.	ID=XP_007898999.1-R1-1-A1;Name=XP_007898999.1;PID=72.46;Coverage=96.65;Note=PID:72.46-Cover:96.65
NW_018069800.1	genBlastG	coding_exon	254652	254979	.	-	.	ID=XP_007898999.1-R1-1-A1-E1;Parent=XP_007898999.1-R1-1-A1
NW_018069800.1	genBlastG	coding_exon	253989	254614	.	-	.	ID=XP_007898999.1-R1-1-A1-E2;Parent=XP_007898999.1-R1-1-A1
NW_018036576.1	genBlastG	transcript	21599	23935	59.08	+	.	ID=XP_007899039.1-R1-1-A1;Name=XP_007899039.1;PID=43.14;Coverage=90.95;Note=PID:43.14-Cover:90.95
NW_018036576.1	genBlastG	coding_exon	21599	21659	.	+	.	ID=XP_007899039.1-R1-1-A1-E1;Parent=XP_007899039.1-R1-1-A1
NW_018036576.1	genBlastG	coding_exon	22560	23708	.	+	.	ID=XP_007899039.1-R1-1-A1-E2;Parent=XP_007899039.1-R1-1-A1
NW_018036576.1	genBlastG	coding_exon	23787	23935	.	+	.	ID=XP_007899039.1-R1-1-A1-E3;Parent=XP_007899039.1-R1-1-A1
NW_018031487.1	genBlastG	transcript	96581	101494	152.7	+	.	ID=XP_007899090.1-R1-1-A1;Name=XP_007899090.1;PID=43.51;Coverage=90.02;Note=PID:43.51-Cover:90.02
NW_018031487.1	genBlastG	coding_exon	96581	96597	.	+	.	ID=XP_007899090.1-R1-1-A1-E1;Parent=XP_007899090.1-R1-1-A1
NW_018031487.1	genBlastG	coding_exon	97097	97299	.	+	.	ID=XP_007899090.1-R1-1-A1-E2;Parent=XP_007899090.1-R1-1-A1
NW_018031487.1	genBlastG	coding_exon	98709	99546	.	+	.	ID=XP_007899090.1-R1-1-A1-E3;Parent=XP_007899090.1-R1-1-A1
NW_018031487.1	genBlastG	coding_exon	99589	100141	.	+	.	ID=XP_007899090.1-R1-1-A1-E4;Parent=XP_007899090.1-R1-1-A1
NW_018031487.1	genBlastG	coding_exon	100178	100617	.	+	.	ID=XP_007899090.1-R1-1-A1-E5;Parent=XP_007899090.1-R1-1-A1
NW_018031487.1	genBlastG	coding_exon	101377	101494	.	+	.	ID=XP_007899090.1-R1-1-A1-E6;Parent=XP_007899090.1-R1-1-A1
NW_018030611.1	genBlastG	transcript	10868	12459	33.44	-	.	ID=XP_007899163.1-R1-1-A1;Name=XP_007899163.1;PID=27.83;Coverage=65.4;Note=PID:27.83-Cover:65.4
NW_018030611.1	genBlastG	coding_exon	12440	12459	.	-	.	ID=XP_007899163.1-R1-1-A1-E1;Parent=XP_007899163.1-R1-1-A1
NW_018030611.1	genBlastG	coding_exon	11901	11966	.	-	.	ID=XP_007899163.1-R1-1-A1-E2;Parent=XP_007899163.1-R1-1-A1
NW_018030611.1	genBlastG	coding_exon	11686	11840	.	-	.	ID=XP_007899163.1-R1-1-A1-E3;Parent=XP_007899163.1-R1-1-A1
NW_018030611.1	genBlastG	coding_exon	11446	11580	.	-	.	ID=XP_007899163.1-R1-1-A1-E4;Parent=XP_007899163.1-R1-1-A1
NW_018030611.1	genBlastG	coding_exon	11315	11352	.	-	.	ID=XP_007899163.1-R1-1-A1-E5;Parent=XP_007899163.1-R1-1-A1
NW_018030611.1	genBlastG	coding_exon	11029	11059	.	-	.	ID=XP_007899163.1-R1-1-A1-E6;Parent=XP_007899163.1-R1-1-A1
NW_018030611.1	genBlastG	coding_exon	10962	11004	.	-	.	ID=XP_007899163.1-R1-1-A1-E7;Parent=XP_007899163.1-R1-1-A1
NW_018030611.1	genBlastG	coding_exon	10868	10949	.	-	.	ID=XP_007899163.1-R1-1-A1-E8;Parent=XP_007899163.1-R1-1-A1
NW_018028833.1	genBlastG	transcript	202622	203482	37.52	+	.	ID=XP_007899189.1-R1-1-A1;Name=XP_007899189.1;PID=27.02;Coverage=54;Note=PID:27.02-Cover:54
NW_018028833.1	genBlastG	coding_exon	202622	203052	.	+	.	ID=XP_007899189.1-R1-1-A1-E1;Parent=XP_007899189.1-R1-1-A1
NW_018028833.1	genBlastG	coding_exon	203131	203330	.	+	.	ID=XP_007899189.1-R1-1-A1-E2;Parent=XP_007899189.1-R1-1-A1
NW_018028833.1	genBlastG	coding_exon	203403	203482	.	+	.	ID=XP_007899189.1-R1-1-A1-E3;Parent=XP_007899189.1-R1-1-A1
NW_018050521.1	genBlastG	transcript	15096	16088	-18.85	-	.	ID=XP_007899302.1-R1-1-A1;Name=XP_007899302.1;PID=42.12;Coverage=72.33;Note=PID:42.12-Cover:72.33
NW_018050521.1	genBlastG	coding_exon	15952	16088	.	-	.	ID=XP_007899302.1-R1-1-A1-E1;Parent=XP_007899302.1-R1-1-A1
NW_018050521.1	genBlastG	coding_exon	15096	15612	.	-	.	ID=XP_007899302.1-R1-1-A1-E2;Parent=XP_007899302.1-R1-1-A1
NW_018047038.1	genBlastG	transcript	26489	36359	75.62	-	.	ID=XP_007899334.1-R1-1-A1;Name=XP_007899334.1;PID=56;Coverage=99.35;Note=PID:56-Cover:99.35
NW_018047038.1	genBlastG	coding_exon	36316	36359	.	-	.	ID=XP_007899334.1-R1-1-A1-E1;Parent=XP_007899334.1-R1-1-A1
NW_018047038.1	genBlastG	coding_exon	35147	35421	.	-	.	ID=XP_007899334.1-R1-1-A1-E2;Parent=XP_007899334.1-R1-1-A1
NW_018047038.1	genBlastG	coding_exon	32651	32768	.	-	.	ID=XP_007899334.1-R1-1-A1-E3;Parent=XP_007899334.1-R1-1-A1
NW_018047038.1	genBlastG	coding_exon	30894	31063	.	-	.	ID=XP_007899334.1-R1-1-A1-E4;Parent=XP_007899334.1-R1-1-A1
NW_018047038.1	genBlastG	coding_exon	30454	30617	.	-	.	ID=XP_007899334.1-R1-1-A1-E5;Parent=XP_007899334.1-R1-1-A1
NW_018047038.1	genBlastG	coding_exon	26489	26638	.	-	.	ID=XP_007899334.1-R1-1-A1-E6;Parent=XP_007899334.1-R1-1-A1
NW_018056660.1	genBlastG	transcript	309819	360510	79.05	-	.	ID=XP_007899486.1-R1-1-A1;Name=XP_007899486.1;PID=50.77;Coverage=79.01;Note=PID:50.77-Cover:79.01
NW_018056660.1	genBlastG	coding_exon	360392	360510	.	-	.	ID=XP_007899486.1-R1-1-A1-E1;Parent=XP_007899486.1-R1-1-A1
NW_018056660.1	genBlastG	coding_exon	358044	358212	.	-	.	ID=XP_007899486.1-R1-1-A1-E2;Parent=XP_007899486.1-R1-1-A1
NW_018056660.1	genBlastG	coding_exon	345006	345154	.	-	.	ID=XP_007899486.1-R1-1-A1-E3;Parent=XP_007899486.1-R1-1-A1
NW_018056660.1	genBlastG	coding_exon	342121	342247	.	-	.	ID=XP_007899486.1-R1-1-A1-E4;Parent=XP_007899486.1-R1-1-A1
NW_018056660.1	genBlastG	coding_exon	338520	338662	.	-	.	ID=XP_007899486.1-R1-1-A1-E5;Parent=XP_007899486.1-R1-1-A1
NW_018056660.1	genBlastG	coding_exon	338297	338435	.	-	.	ID=XP_007899486.1-R1-1-A1-E6;Parent=XP_007899486.1-R1-1-A1
NW_018056660.1	genBlastG	coding_exon	331642	331751	.	-	.	ID=XP_007899486.1-R1-1-A1-E7;Parent=XP_007899486.1-R1-1-A1
NW_018056660.1	genBlastG	coding_exon	331133	331262	.	-	.	ID=XP_007899486.1-R1-1-A1-E8;Parent=XP_007899486.1-R1-1-A1
NW_018056660.1	genBlastG	coding_exon	328254	328386	.	-	.	ID=XP_007899486.1-R1-1-A1-E9;Parent=XP_007899486.1-R1-1-A1
NW_018056660.1	genBlastG	coding_exon	312925	313121	.	-	.	ID=XP_007899486.1-R1-1-A1-E10;Parent=XP_007899486.1-R1-1-A1
NW_018056660.1	genBlastG	coding_exon	310569	310728	.	-	.	ID=XP_007899486.1-R1-1-A1-E11;Parent=XP_007899486.1-R1-1-A1
NW_018056660.1	genBlastG	coding_exon	309819	309871	.	-	.	ID=XP_007899486.1-R1-1-A1-E12;Parent=XP_007899486.1-R1-1-A1
NW_018061454.1	genBlastG	transcript	58227	59148	69.91	+	.	ID=XP_007899587.1-R1-1-A1;Name=XP_007899587.1;PID=65.24;Coverage=77.83;Note=PID:65.24-Cover:77.83
NW_018061454.1	genBlastG	coding_exon	58227	58245	.	+	.	ID=XP_007899587.1-R1-1-A1-E1;Parent=XP_007899587.1-R1-1-A1
NW_018061454.1	genBlastG	coding_exon	58571	58617	.	+	.	ID=XP_007899587.1-R1-1-A1-E2;Parent=XP_007899587.1-R1-1-A1
NW_018061454.1	genBlastG	coding_exon	58675	59148	.	+	.	ID=XP_007899587.1-R1-1-A1-E3;Parent=XP_007899587.1-R1-1-A1
NW_018056305.1	genBlastG	transcript	263920	265218	12.2	+	.	ID=XP_007899741.1-R1-1-A1;Name=XP_007899741.1;PID=39.1;Coverage=77.5;Note=PID:39.1-Cover:77.5
NW_018056305.1	genBlastG	coding_exon	263920	264030	.	+	.	ID=XP_007899741.1-R1-1-A1-E1;Parent=XP_007899741.1-R1-1-A1
NW_018056305.1	genBlastG	coding_exon	264880	264998	.	+	.	ID=XP_007899741.1-R1-1-A1-E2;Parent=XP_007899741.1-R1-1-A1
NW_018056305.1	genBlastG	coding_exon	265167	265218	.	+	.	ID=XP_007899741.1-R1-1-A1-E3;Parent=XP_007899741.1-R1-1-A1
NW_018032832.1	genBlastG	transcript	78307	79559	16.5	-	.	ID=XP_007899788.1-R1-1-A1;Name=XP_007899788.1;PID=30.97;Coverage=100;Note=PID:30.97-Cover:100
NW_018032832.1	genBlastG	coding_exon	79435	79559	.	-	.	ID=XP_007899788.1-R1-1-A1-E1;Parent=XP_007899788.1-R1-1-A1
NW_018032832.1	genBlastG	coding_exon	78307	78727	.	-	.	ID=XP_007899788.1-R1-1-A1-E2;Parent=XP_007899788.1-R1-1-A1
NW_018044627.1	genBlastG	transcript	13792	33510	15.96	-	.	ID=XP_007899813.1-R1-1-A1;Name=XP_007899813.1;PID=33.87;Coverage=56.54;Note=PID:33.87-Cover:56.54
NW_018044627.1	genBlastG	coding_exon	33442	33510	.	-	.	ID=XP_007899813.1-R1-1-A1-E1;Parent=XP_007899813.1-R1-1-A1
NW_018044627.1	genBlastG	coding_exon	33055	33265	.	-	.	ID=XP_007899813.1-R1-1-A1-E2;Parent=XP_007899813.1-R1-1-A1
NW_018044627.1	genBlastG	coding_exon	23570	23601	.	-	.	ID=XP_007899813.1-R1-1-A1-E3;Parent=XP_007899813.1-R1-1-A1
NW_018044627.1	genBlastG	coding_exon	23441	23527	.	-	.	ID=XP_007899813.1-R1-1-A1-E4;Parent=XP_007899813.1-R1-1-A1
NW_018044627.1	genBlastG	coding_exon	13792	13914	.	-	.	ID=XP_007899813.1-R1-1-A1-E5;Parent=XP_007899813.1-R1-1-A1
NW_018036450.1	genBlastG	transcript	24460	64605	51.91	-	.	ID=XP_007899851.1-R1-1-A1;Name=XP_007899851.1;PID=18.8;Coverage=24.78;Note=PID:18.8-Cover:24.78
NW_018036450.1	genBlastG	coding_exon	64450	64605	.	-	.	ID=XP_007899851.1-R1-1-A1-E1;Parent=XP_007899851.1-R1-1-A1
NW_018036450.1	genBlastG	coding_exon	38953	39036	.	-	.	ID=XP_007899851.1-R1-1-A1-E2;Parent=XP_007899851.1-R1-1-A1
NW_018036450.1	genBlastG	coding_exon	25397	25572	.	-	.	ID=XP_007899851.1-R1-1-A1-E3;Parent=XP_007899851.1-R1-1-A1
NW_018036450.1	genBlastG	coding_exon	24563	24748	.	-	.	ID=XP_007899851.1-R1-1-A1-E4;Parent=XP_007899851.1-R1-1-A1
NW_018036450.1	genBlastG	coding_exon	24460	24526	.	-	.	ID=XP_007899851.1-R1-1-A1-E5;Parent=XP_007899851.1-R1-1-A1
NW_018030800.1	genBlastG	transcript	8085	8822	33.5	+	.	ID=XP_007899855.1-R1-1-A1;Name=XP_007899855.1;PID=33.55;Coverage=88.39;Note=PID:33.55-Cover:88.39
NW_018030800.1	genBlastG	coding_exon	8085	8186	.	+	.	ID=XP_007899855.1-R1-1-A1-E1;Parent=XP_007899855.1-R1-1-A1
NW_018030800.1	genBlastG	coding_exon	8214	8822	.	+	.	ID=XP_007899855.1-R1-1-A1-E2;Parent=XP_007899855.1-R1-1-A1
NW_018030393.1	genBlastG	transcript	25197	25813	1.05	-	.	ID=XP_007899904.1-R1-1-A1;Name=XP_007899904.1;PID=22.11;Coverage=35.93;Note=PID:22.11-Cover:35.93
NW_018030393.1	genBlastG	coding_exon	25786	25813	.	-	.	ID=XP_007899904.1-R1-1-A1-E1;Parent=XP_007899904.1-R1-1-A1
NW_018030393.1	genBlastG	coding_exon	25197	25669	.	-	.	ID=XP_007899904.1-R1-1-A1-E2;Parent=XP_007899904.1-R1-1-A1
NW_018030323.1	genBlastG	transcript	301347	313427	3.511	+	.	ID=XP_007900105.1-R1-1-A1;Name=XP_007900105.1;PID=31.35;Coverage=56.88;Note=PID:31.35-Cover:56.88
NW_018030323.1	genBlastG	coding_exon	301347	301435	.	+	.	ID=XP_007900105.1-R1-1-A1-E1;Parent=XP_007900105.1-R1-1-A1
NW_018030323.1	genBlastG	coding_exon	301516	301624	.	+	.	ID=XP_007900105.1-R1-1-A1-E2;Parent=XP_007900105.1-R1-1-A1
NW_018030323.1	genBlastG	coding_exon	301647	301737	.	+	.	ID=XP_007900105.1-R1-1-A1-E3;Parent=XP_007900105.1-R1-1-A1
NW_018030323.1	genBlastG	coding_exon	301761	301810	.	+	.	ID=XP_007900105.1-R1-1-A1-E4;Parent=XP_007900105.1-R1-1-A1
NW_018030323.1	genBlastG	coding_exon	312113	312298	.	+	.	ID=XP_007900105.1-R1-1-A1-E5;Parent=XP_007900105.1-R1-1-A1
NW_018030323.1	genBlastG	coding_exon	312395	312480	.	+	.	ID=XP_007900105.1-R1-1-A1-E6;Parent=XP_007900105.1-R1-1-A1
NW_018030323.1	genBlastG	coding_exon	313292	313427	.	+	.	ID=XP_007900105.1-R1-1-A1-E7;Parent=XP_007900105.1-R1-1-A1
NW_018080170.1	genBlastG	transcript	51197	52495	114.4	+	.	ID=XP_007900360.1-R1-1-A1;Name=XP_007900360.1;PID=53.96;Coverage=100;Note=PID:53.96-Cover:100
NW_018080170.1	genBlastG	coding_exon	51197	52495	.	+	.	ID=XP_007900360.1-R1-1-A1-E1;Parent=XP_007900360.1-R1-1-A1
NW_018070474.1	genBlastG	transcript	25759	27033	11	+	.	ID=XP_007900637.1-R1-1-A1;Name=XP_007900637.1;PID=23.16;Coverage=66.55;Note=PID:23.16-Cover:66.55
NW_018070474.1	genBlastG	coding_exon	25759	25836	.	+	.	ID=XP_007900637.1-R1-1-A1-E1;Parent=XP_007900637.1-R1-1-A1
NW_018070474.1	genBlastG	coding_exon	26524	27033	.	+	.	ID=XP_007900637.1-R1-1-A1-E2;Parent=XP_007900637.1-R1-1-A1
NW_018056242.1	genBlastG	transcript	159089	163067	122.1	+	.	ID=XP_007900719.1-R1-1-A1;Name=XP_007900719.1;PID=32.11;Coverage=100;Note=PID:32.11-Cover:100
NW_018056242.1	genBlastG	coding_exon	159089	161866	.	+	.	ID=XP_007900719.1-R1-1-A1-E1;Parent=XP_007900719.1-R1-1-A1
NW_018056242.1	genBlastG	coding_exon	161948	162632	.	+	.	ID=XP_007900719.1-R1-1-A1-E2;Parent=XP_007900719.1-R1-1-A1
NW_018056242.1	genBlastG	coding_exon	162649	163067	.	+	.	ID=XP_007900719.1-R1-1-A1-E3;Parent=XP_007900719.1-R1-1-A1
NW_018036302.1	genBlastG	transcript	64673	66469	53.34	+	.	ID=XP_007900745.1-R1-1-A1;Name=XP_007900745.1;PID=20.6;Coverage=43.02;Note=PID:20.6-Cover:43.02
NW_018036302.1	genBlastG	coding_exon	64673	64704	.	+	.	ID=XP_007900745.1-R1-1-A1-E1;Parent=XP_007900745.1-R1-1-A1
NW_018036302.1	genBlastG	coding_exon	65548	65549	.	+	.	ID=XP_007900745.1-R1-1-A1-E2;Parent=XP_007900745.1-R1-1-A1
NW_018036302.1	genBlastG	coding_exon	65577	65601	.	+	.	ID=XP_007900745.1-R1-1-A1-E3;Parent=XP_007900745.1-R1-1-A1
NW_018036302.1	genBlastG	coding_exon	65743	65777	.	+	.	ID=XP_007900745.1-R1-1-A1-E4;Parent=XP_007900745.1-R1-1-A1
NW_018036302.1	genBlastG	coding_exon	65850	65888	.	+	.	ID=XP_007900745.1-R1-1-A1-E5;Parent=XP_007900745.1-R1-1-A1
NW_018036302.1	genBlastG	coding_exon	65970	66008	.	+	.	ID=XP_007900745.1-R1-1-A1-E6;Parent=XP_007900745.1-R1-1-A1
NW_018036302.1	genBlastG	coding_exon	66096	66128	.	+	.	ID=XP_007900745.1-R1-1-A1-E7;Parent=XP_007900745.1-R1-1-A1
NW_018036302.1	genBlastG	coding_exon	66210	66469	.	+	.	ID=XP_007900745.1-R1-1-A1-E8;Parent=XP_007900745.1-R1-1-A1
NW_018056147.1	genBlastG	transcript	168605	225852	90.68	+	.	ID=XP_007900810.1-R1-1-A1;Name=XP_007900810.1;PID=32.96;Coverage=47.66;Note=PID:32.96-Cover:47.66
NW_018056147.1	genBlastG	coding_exon	168605	168718	.	+	.	ID=XP_007900810.1-R1-1-A1-E1;Parent=XP_007900810.1-R1-1-A1
NW_018056147.1	genBlastG	coding_exon	169975	170098	.	+	.	ID=XP_007900810.1-R1-1-A1-E2;Parent=XP_007900810.1-R1-1-A1
NW_018056147.1	genBlastG	coding_exon	175804	175890	.	+	.	ID=XP_007900810.1-R1-1-A1-E3;Parent=XP_007900810.1-R1-1-A1
NW_018056147.1	genBlastG	coding_exon	177403	177488	.	+	.	ID=XP_007900810.1-R1-1-A1-E4;Parent=XP_007900810.1-R1-1-A1
NW_018056147.1	genBlastG	coding_exon	177569	177657	.	+	.	ID=XP_007900810.1-R1-1-A1-E5;Parent=XP_007900810.1-R1-1-A1
NW_018056147.1	genBlastG	coding_exon	188363	188397	.	+	.	ID=XP_007900810.1-R1-1-A1-E6;Parent=XP_007900810.1-R1-1-A1
NW_018056147.1	genBlastG	coding_exon	191878	192021	.	+	.	ID=XP_007900810.1-R1-1-A1-E7;Parent=XP_007900810.1-R1-1-A1
NW_018056147.1	genBlastG	coding_exon	198633	198676	.	+	.	ID=XP_007900810.1-R1-1-A1-E8;Parent=XP_007900810.1-R1-1-A1
NW_018056147.1	genBlastG	coding_exon	210846	210950	.	+	.	ID=XP_007900810.1-R1-1-A1-E9;Parent=XP_007900810.1-R1-1-A1
NW_018056147.1	genBlastG	coding_exon	211499	211559	.	+	.	ID=XP_007900810.1-R1-1-A1-E10;Parent=XP_007900810.1-R1-1-A1
NW_018056147.1	genBlastG	coding_exon	225025	225173	.	+	.	ID=XP_007900810.1-R1-1-A1-E11;Parent=XP_007900810.1-R1-1-A1
NW_018056147.1	genBlastG	coding_exon	225484	225852	.	+	.	ID=XP_007900810.1-R1-1-A1-E12;Parent=XP_007900810.1-R1-1-A1
NW_018053013.1	genBlastG	transcript	12543	15001	48.35	-	.	ID=XP_007900964.1-R1-1-A1;Name=XP_007900964.1;PID=54.02;Coverage=80.45;Note=PID:54.02-Cover:80.45
NW_018053013.1	genBlastG	coding_exon	14959	15001	.	-	.	ID=XP_007900964.1-R1-1-A1-E1;Parent=XP_007900964.1-R1-1-A1
NW_018053013.1	genBlastG	coding_exon	14718	14908	.	-	.	ID=XP_007900964.1-R1-1-A1-E2;Parent=XP_007900964.1-R1-1-A1
NW_018053013.1	genBlastG	coding_exon	14197	14342	.	-	.	ID=XP_007900964.1-R1-1-A1-E3;Parent=XP_007900964.1-R1-1-A1
NW_018053013.1	genBlastG	coding_exon	12543	12696	.	-	.	ID=XP_007900964.1-R1-1-A1-E4;Parent=XP_007900964.1-R1-1-A1
NW_018062440.1	genBlastG	transcript	325060	328774	33.09	-	.	ID=XP_007901083.1-R1-1-A1;Name=XP_007901083.1;PID=34.07;Coverage=60.92;Note=PID:34.07-Cover:60.92
NW_018062440.1	genBlastG	coding_exon	328745	328774	.	-	.	ID=XP_007901083.1-R1-1-A1-E1;Parent=XP_007901083.1-R1-1-A1
NW_018062440.1	genBlastG	coding_exon	328407	328486	.	-	.	ID=XP_007901083.1-R1-1-A1-E2;Parent=XP_007901083.1-R1-1-A1
NW_018062440.1	genBlastG	coding_exon	328152	328388	.	-	.	ID=XP_007901083.1-R1-1-A1-E3;Parent=XP_007901083.1-R1-1-A1
NW_018062440.1	genBlastG	coding_exon	325758	325951	.	-	.	ID=XP_007901083.1-R1-1-A1-E4;Parent=XP_007901083.1-R1-1-A1
NW_018062440.1	genBlastG	coding_exon	325060	325157	.	-	.	ID=XP_007901083.1-R1-1-A1-E5;Parent=XP_007901083.1-R1-1-A1
NW_018034853.1	genBlastG	transcript	161931	166009	75.55	-	.	ID=XP_007901092.1-R1-1-A1;Name=XP_007901092.1;PID=24.29;Coverage=35.89;Note=PID:24.29-Cover:35.89
NW_018034853.1	genBlastG	coding_exon	165981	166009	.	-	.	ID=XP_007901092.1-R1-1-A1-E1;Parent=XP_007901092.1-R1-1-A1
NW_018034853.1	genBlastG	coding_exon	165873	165944	.	-	.	ID=XP_007901092.1-R1-1-A1-E2;Parent=XP_007901092.1-R1-1-A1
NW_018034853.1	genBlastG	coding_exon	165598	165852	.	-	.	ID=XP_007901092.1-R1-1-A1-E3;Parent=XP_007901092.1-R1-1-A1
NW_018034853.1	genBlastG	coding_exon	162400	162909	.	-	.	ID=XP_007901092.1-R1-1-A1-E4;Parent=XP_007901092.1-R1-1-A1
NW_018034853.1	genBlastG	coding_exon	161977	162000	.	-	.	ID=XP_007901092.1-R1-1-A1-E5;Parent=XP_007901092.1-R1-1-A1
NW_018034853.1	genBlastG	coding_exon	161931	161940	.	-	.	ID=XP_007901092.1-R1-1-A1-E6;Parent=XP_007901092.1-R1-1-A1
NW_018049754.1	genBlastG	transcript	1901	3553	15.56	+	.	ID=XP_007901098.1-R1-1-A1;Name=XP_007901098.1;PID=27.06;Coverage=100;Note=PID:27.06-Cover:100
NW_018049754.1	genBlastG	coding_exon	1901	2065	.	+	.	ID=XP_007901098.1-R1-1-A1-E1;Parent=XP_007901098.1-R1-1-A1
NW_018049754.1	genBlastG	coding_exon	2114	3553	.	+	.	ID=XP_007901098.1-R1-1-A1-E2;Parent=XP_007901098.1-R1-1-A1
NW_018037307.1	genBlastG	transcript	633	25301	42.49	+	.	ID=XP_007901141.1-R1-1-A1;Name=XP_007901141.1;PID=22.27;Coverage=38.28;Note=PID:22.27-Cover:38.28
NW_018037307.1	genBlastG	coding_exon	633	733	.	+	.	ID=XP_007901141.1-R1-1-A1-E1;Parent=XP_007901141.1-R1-1-A1
NW_018037307.1	genBlastG	coding_exon	809	1500	.	+	.	ID=XP_007901141.1-R1-1-A1-E2;Parent=XP_007901141.1-R1-1-A1
NW_018037307.1	genBlastG	coding_exon	1549	1714	.	+	.	ID=XP_007901141.1-R1-1-A1-E3;Parent=XP_007901141.1-R1-1-A1
NW_018037307.1	genBlastG	coding_exon	1739	1918	.	+	.	ID=XP_007901141.1-R1-1-A1-E4;Parent=XP_007901141.1-R1-1-A1
NW_018037307.1	genBlastG	coding_exon	9075	9319	.	+	.	ID=XP_007901141.1-R1-1-A1-E5;Parent=XP_007901141.1-R1-1-A1
NW_018037307.1	genBlastG	coding_exon	24916	25036	.	+	.	ID=XP_007901141.1-R1-1-A1-E6;Parent=XP_007901141.1-R1-1-A1
NW_018037307.1	genBlastG	coding_exon	25193	25301	.	+	.	ID=XP_007901141.1-R1-1-A1-E7;Parent=XP_007901141.1-R1-1-A1
NW_018028013.1	genBlastG	transcript	6954	7908	-52.29	+	.	ID=XP_007901162.1-R1-1-A1;Name=XP_007901162.1;PID=22.74;Coverage=25.67;Note=PID:22.74-Cover:25.67
NW_018028013.1	genBlastG	coding_exon	6954	7010	.	+	.	ID=XP_007901162.1-R1-1-A1-E1;Parent=XP_007901162.1-R1-1-A1
NW_018028013.1	genBlastG	coding_exon	7648	7908	.	+	.	ID=XP_007901162.1-R1-1-A1-E2;Parent=XP_007901162.1-R1-1-A1
NW_018081979.1	genBlastG	transcript	98288	98635	36.5	-	.	ID=XP_007901218.1-R1-1-A1;Name=XP_007901218.1;PID=64.96;Coverage=99.14;Note=PID:64.96-Cover:99.14
NW_018081979.1	genBlastG	coding_exon	98288	98635	.	-	.	ID=XP_007901218.1-R1-1-A1-E1;Parent=XP_007901218.1-R1-1-A1
NW_018049001.1	genBlastG	transcript	17619	20792	7.133	-	.	ID=XP_007901219.1-R1-1-A1;Name=XP_007901219.1;PID=28.61;Coverage=56.52;Note=PID:28.61-Cover:56.52
NW_018049001.1	genBlastG	coding_exon	20693	20792	.	-	.	ID=XP_007901219.1-R1-1-A1-E1;Parent=XP_007901219.1-R1-1-A1
NW_018049001.1	genBlastG	coding_exon	20206	20510	.	-	.	ID=XP_007901219.1-R1-1-A1-E2;Parent=XP_007901219.1-R1-1-A1
NW_018049001.1	genBlastG	coding_exon	18863	18924	.	-	.	ID=XP_007901219.1-R1-1-A1-E3;Parent=XP_007901219.1-R1-1-A1
NW_018049001.1	genBlastG	coding_exon	18749	18805	.	-	.	ID=XP_007901219.1-R1-1-A1-E4;Parent=XP_007901219.1-R1-1-A1
NW_018049001.1	genBlastG	coding_exon	18123	18273	.	-	.	ID=XP_007901219.1-R1-1-A1-E5;Parent=XP_007901219.1-R1-1-A1
NW_018049001.1	genBlastG	coding_exon	17619	18077	.	-	.	ID=XP_007901219.1-R1-1-A1-E6;Parent=XP_007901219.1-R1-1-A1
NW_018044199.1	genBlastG	transcript	4461	6425	12.38	+	.	ID=XP_007901228.1-R1-1-A1;Name=XP_007901228.1;PID=48.72;Coverage=72.28;Note=PID:48.72-Cover:72.28
NW_018044199.1	genBlastG	coding_exon	4461	4490	.	+	.	ID=XP_007901228.1-R1-1-A1-E1;Parent=XP_007901228.1-R1-1-A1
NW_018044199.1	genBlastG	coding_exon	5319	5492	.	+	.	ID=XP_007901228.1-R1-1-A1-E2;Parent=XP_007901228.1-R1-1-A1
NW_018044199.1	genBlastG	coding_exon	5507	5595	.	+	.	ID=XP_007901228.1-R1-1-A1-E3;Parent=XP_007901228.1-R1-1-A1
NW_018044199.1	genBlastG	coding_exon	5716	5826	.	+	.	ID=XP_007901228.1-R1-1-A1-E4;Parent=XP_007901228.1-R1-1-A1
NW_018044199.1	genBlastG	coding_exon	5848	5966	.	+	.	ID=XP_007901228.1-R1-1-A1-E5;Parent=XP_007901228.1-R1-1-A1
NW_018044199.1	genBlastG	coding_exon	6367	6425	.	+	.	ID=XP_007901228.1-R1-1-A1-E6;Parent=XP_007901228.1-R1-1-A1
NW_018056022.1	genBlastG	transcript	6825	7231	21	+	.	ID=XP_007901239.1-R1-1-A1;Name=XP_007901239.1;PID=32.4;Coverage=37.43;Note=PID:32.4-Cover:37.43
NW_018056022.1	genBlastG	coding_exon	6825	6828	.	+	.	ID=XP_007901239.1-R1-1-A1-E1;Parent=XP_007901239.1-R1-1-A1
NW_018056022.1	genBlastG	coding_exon	6856	6878	.	+	.	ID=XP_007901239.1-R1-1-A1-E2;Parent=XP_007901239.1-R1-1-A1
NW_018056022.1	genBlastG	coding_exon	6963	6989	.	+	.	ID=XP_007901239.1-R1-1-A1-E3;Parent=XP_007901239.1-R1-1-A1
NW_018056022.1	genBlastG	coding_exon	7082	7231	.	+	.	ID=XP_007901239.1-R1-1-A1-E4;Parent=XP_007901239.1-R1-1-A1
NW_018074639.1	genBlastG	transcript	107777	155866	171.7	+	.	ID=XP_007901316.1-R1-1-A1;Name=XP_007901316.1;PID=58.54;Coverage=84.44;Note=PID:58.54-Cover:84.44
NW_018074639.1	genBlastG	coding_exon	107777	107930	.	+	.	ID=XP_007901316.1-R1-1-A1-E1;Parent=XP_007901316.1-R1-1-A1
NW_018074639.1	genBlastG	coding_exon	110299	110438	.	+	.	ID=XP_007901316.1-R1-1-A1-E2;Parent=XP_007901316.1-R1-1-A1
NW_018074639.1	genBlastG	coding_exon	110516	110660	.	+	.	ID=XP_007901316.1-R1-1-A1-E3;Parent=XP_007901316.1-R1-1-A1
NW_018074639.1	genBlastG	coding_exon	121771	122001	.	+	.	ID=XP_007901316.1-R1-1-A1-E4;Parent=XP_007901316.1-R1-1-A1
NW_018074639.1	genBlastG	coding_exon	123148	123250	.	+	.	ID=XP_007901316.1-R1-1-A1-E5;Parent=XP_007901316.1-R1-1-A1
NW_018074639.1	genBlastG	coding_exon	125189	125290	.	+	.	ID=XP_007901316.1-R1-1-A1-E6;Parent=XP_007901316.1-R1-1-A1
NW_018074639.1	genBlastG	coding_exon	141452	141617	.	+	.	ID=XP_007901316.1-R1-1-A1-E7;Parent=XP_007901316.1-R1-1-A1
NW_018074639.1	genBlastG	coding_exon	145525	145604	.	+	.	ID=XP_007901316.1-R1-1-A1-E8;Parent=XP_007901316.1-R1-1-A1
NW_018074639.1	genBlastG	coding_exon	147137	147250	.	+	.	ID=XP_007901316.1-R1-1-A1-E9;Parent=XP_007901316.1-R1-1-A1
NW_018074639.1	genBlastG	coding_exon	148642	148771	.	+	.	ID=XP_007901316.1-R1-1-A1-E10;Parent=XP_007901316.1-R1-1-A1
NW_018074639.1	genBlastG	coding_exon	150419	150605	.	+	.	ID=XP_007901316.1-R1-1-A1-E11;Parent=XP_007901316.1-R1-1-A1
NW_018074639.1	genBlastG	coding_exon	155430	155619	.	+	.	ID=XP_007901316.1-R1-1-A1-E12;Parent=XP_007901316.1-R1-1-A1
NW_018074639.1	genBlastG	coding_exon	155848	155866	.	+	.	ID=XP_007901316.1-R1-1-A1-E13;Parent=XP_007901316.1-R1-1-A1
NW_018066537.1	genBlastG	transcript	87683	119484	5.889	+	.	ID=XP_007901599.1-R1-1-A1;Name=XP_007901599.1;PID=53.59;Coverage=84.52;Note=PID:53.59-Cover:84.52
NW_018066537.1	genBlastG	coding_exon	87683	87729	.	+	.	ID=XP_007901599.1-R1-1-A1-E1;Parent=XP_007901599.1-R1-1-A1
NW_018066537.1	genBlastG	coding_exon	88138	88287	.	+	.	ID=XP_007901599.1-R1-1-A1-E2;Parent=XP_007901599.1-R1-1-A1
NW_018066537.1	genBlastG	coding_exon	119054	119229	.	+	.	ID=XP_007901599.1-R1-1-A1-E3;Parent=XP_007901599.1-R1-1-A1
NW_018066537.1	genBlastG	coding_exon	119429	119484	.	+	.	ID=XP_007901599.1-R1-1-A1-E4;Parent=XP_007901599.1-R1-1-A1
NW_018076483.1	genBlastG	transcript	67136	93149	90.19	-	.	ID=XP_007901896.1-R1-1-A1;Name=XP_007901896.1;PID=47.22;Coverage=86.33;Note=PID:47.22-Cover:86.33
NW_018076483.1	genBlastG	coding_exon	93134	93149	.	-	.	ID=XP_007901896.1-R1-1-A1-E1;Parent=XP_007901896.1-R1-1-A1
NW_018076483.1	genBlastG	coding_exon	92693	92869	.	-	.	ID=XP_007901896.1-R1-1-A1-E2;Parent=XP_007901896.1-R1-1-A1
NW_018076483.1	genBlastG	coding_exon	91715	91868	.	-	.	ID=XP_007901896.1-R1-1-A1-E3;Parent=XP_007901896.1-R1-1-A1
NW_018076483.1	genBlastG	coding_exon	89069	89255	.	-	.	ID=XP_007901896.1-R1-1-A1-E4;Parent=XP_007901896.1-R1-1-A1
NW_018076483.1	genBlastG	coding_exon	85275	85462	.	-	.	ID=XP_007901896.1-R1-1-A1-E5;Parent=XP_007901896.1-R1-1-A1
NW_018076483.1	genBlastG	coding_exon	78119	78386	.	-	.	ID=XP_007901896.1-R1-1-A1-E6;Parent=XP_007901896.1-R1-1-A1
NW_018076483.1	genBlastG	coding_exon	74618	74690	.	-	.	ID=XP_007901896.1-R1-1-A1-E7;Parent=XP_007901896.1-R1-1-A1
NW_018076483.1	genBlastG	coding_exon	74538	74602	.	-	.	ID=XP_007901896.1-R1-1-A1-E8;Parent=XP_007901896.1-R1-1-A1
NW_018076483.1	genBlastG	coding_exon	68125	68347	.	-	.	ID=XP_007901896.1-R1-1-A1-E9;Parent=XP_007901896.1-R1-1-A1
NW_018076483.1	genBlastG	coding_exon	67136	67284	.	-	.	ID=XP_007901896.1-R1-1-A1-E10;Parent=XP_007901896.1-R1-1-A1
NW_018031312.1	genBlastG	transcript	17353	91958	45.14	-	.	ID=XP_007902074.1-R1-1-A1;Name=XP_007902074.1;PID=33.4;Coverage=52;Note=PID:33.4-Cover:52
NW_018031312.1	genBlastG	coding_exon	91775	91958	.	-	.	ID=XP_007902074.1-R1-1-A1-E1;Parent=XP_007902074.1-R1-1-A1
NW_018031312.1	genBlastG	coding_exon	91557	91689	.	-	.	ID=XP_007902074.1-R1-1-A1-E2;Parent=XP_007902074.1-R1-1-A1
NW_018031312.1	genBlastG	coding_exon	37381	37629	.	-	.	ID=XP_007902074.1-R1-1-A1-E3;Parent=XP_007902074.1-R1-1-A1
NW_018031312.1	genBlastG	coding_exon	17353	17530	.	-	.	ID=XP_007902074.1-R1-1-A1-E4;Parent=XP_007902074.1-R1-1-A1
NW_018062523.1	genBlastG	transcript	102920	108791	38.63	-	.	ID=XP_007902125.1-R1-1-A1;Name=XP_007902125.1;PID=41.21;Coverage=52.89;Note=PID:41.21-Cover:52.89
NW_018062523.1	genBlastG	coding_exon	108750	108791	.	-	.	ID=XP_007902125.1-R1-1-A1-E1;Parent=XP_007902125.1-R1-1-A1
NW_018062523.1	genBlastG	coding_exon	108651	108708	.	-	.	ID=XP_007902125.1-R1-1-A1-E2;Parent=XP_007902125.1-R1-1-A1
NW_018062523.1	genBlastG	coding_exon	108479	108631	.	-	.	ID=XP_007902125.1-R1-1-A1-E3;Parent=XP_007902125.1-R1-1-A1
NW_018062523.1	genBlastG	coding_exon	102920	103191	.	-	.	ID=XP_007902125.1-R1-1-A1-E4;Parent=XP_007902125.1-R1-1-A1
NW_018062251.1	genBlastG	transcript	28989	30114	18.53	+	.	ID=XP_007902152.1-R1-1-A1;Name=XP_007902152.1;PID=29.77;Coverage=60;Note=PID:29.77-Cover:60
NW_018062251.1	genBlastG	coding_exon	28989	29006	.	+	.	ID=XP_007902152.1-R1-1-A1-E1;Parent=XP_007902152.1-R1-1-A1
NW_018062251.1	genBlastG	coding_exon	29058	29132	.	+	.	ID=XP_007902152.1-R1-1-A1-E2;Parent=XP_007902152.1-R1-1-A1
NW_018062251.1	genBlastG	coding_exon	29845	30114	.	+	.	ID=XP_007902152.1-R1-1-A1-E3;Parent=XP_007902152.1-R1-1-A1
NW_018037391.1	genBlastG	transcript	186654	187407	27.32	+	.	ID=XP_007902197.1-R1-1-A1;Name=XP_007902197.1;PID=33.7;Coverage=79.22;Note=PID:33.7-Cover:79.22
NW_018037391.1	genBlastG	coding_exon	186654	187080	.	+	.	ID=XP_007902197.1-R1-1-A1-E1;Parent=XP_007902197.1-R1-1-A1
NW_018037391.1	genBlastG	coding_exon	187283	187407	.	+	.	ID=XP_007902197.1-R1-1-A1-E2;Parent=XP_007902197.1-R1-1-A1
NW_018080848.1	genBlastG	transcript	28786	30206	15	+	.	ID=XP_007902221.1-R1-1-A1;Name=XP_007902221.1;PID=16.14;Coverage=23.77;Note=PID:16.14-Cover:23.77
NW_018080848.1	genBlastG	coding_exon	28786	28855	.	+	.	ID=XP_007902221.1-R1-1-A1-E1;Parent=XP_007902221.1-R1-1-A1
NW_018080848.1	genBlastG	coding_exon	29659	29790	.	+	.	ID=XP_007902221.1-R1-1-A1-E2;Parent=XP_007902221.1-R1-1-A1
NW_018080848.1	genBlastG	coding_exon	30073	30206	.	+	.	ID=XP_007902221.1-R1-1-A1-E3;Parent=XP_007902221.1-R1-1-A1
NW_018030360.1	genBlastG	transcript	204844	206443	-87.85	-	.	ID=XP_007902721.1-R1-1-A1;Name=XP_007902721.1;PID=8.106;Coverage=8.634;Note=PID:8.106-Cover:8.634
NW_018030360.1	genBlastG	coding_exon	206376	206443	.	-	.	ID=XP_007902721.1-R1-1-A1-E1;Parent=XP_007902721.1-R1-1-A1
NW_018030360.1	genBlastG	coding_exon	206152	206360	.	-	.	ID=XP_007902721.1-R1-1-A1-E2;Parent=XP_007902721.1-R1-1-A1
NW_018030360.1	genBlastG	coding_exon	206051	206138	.	-	.	ID=XP_007902721.1-R1-1-A1-E3;Parent=XP_007902721.1-R1-1-A1
NW_018030360.1	genBlastG	coding_exon	205862	206023	.	-	.	ID=XP_007902721.1-R1-1-A1-E4;Parent=XP_007902721.1-R1-1-A1
NW_018030360.1	genBlastG	coding_exon	205495	205791	.	-	.	ID=XP_007902721.1-R1-1-A1-E5;Parent=XP_007902721.1-R1-1-A1
NW_018030360.1	genBlastG	coding_exon	205289	205444	.	-	.	ID=XP_007902721.1-R1-1-A1-E6;Parent=XP_007902721.1-R1-1-A1
NW_018030360.1	genBlastG	coding_exon	205213	205234	.	-	.	ID=XP_007902721.1-R1-1-A1-E7;Parent=XP_007902721.1-R1-1-A1
NW_018030360.1	genBlastG	coding_exon	204975	205098	.	-	.	ID=XP_007902721.1-R1-1-A1-E8;Parent=XP_007902721.1-R1-1-A1
NW_018030360.1	genBlastG	coding_exon	204844	204953	.	-	.	ID=XP_007902721.1-R1-1-A1-E9;Parent=XP_007902721.1-R1-1-A1
NW_018030537.1	genBlastG	transcript	117311	161359	43.37	+	.	ID=XP_007902818.1-R1-1-A1;Name=XP_007902818.1;PID=66.43;Coverage=100;Note=PID:66.43-Cover:100
NW_018030537.1	genBlastG	coding_exon	117311	117332	.	+	.	ID=XP_007902818.1-R1-1-A1-E1;Parent=XP_007902818.1-R1-1-A1
NW_018030537.1	genBlastG	coding_exon	118317	118516	.	+	.	ID=XP_007902818.1-R1-1-A1-E2;Parent=XP_007902818.1-R1-1-A1
NW_018030537.1	genBlastG	coding_exon	160252	160375	.	+	.	ID=XP_007902818.1-R1-1-A1-E3;Parent=XP_007902818.1-R1-1-A1
NW_018030537.1	genBlastG	coding_exon	161295	161359	.	+	.	ID=XP_007902818.1-R1-1-A1-E4;Parent=XP_007902818.1-R1-1-A1
NW_018045609.1	genBlastG	transcript	2058	3142	-182	-	.	ID=XP_007902977.1-R1-1-A1;Name=XP_007902977.1;PID=9.043;Coverage=10.09;Note=PID:9.043-Cover:10.09
NW_018045609.1	genBlastG	coding_exon	3132	3142	.	-	.	ID=XP_007902977.1-R1-1-A1-E1;Parent=XP_007902977.1-R1-1-A1
NW_018045609.1	genBlastG	coding_exon	2531	2709	.	-	.	ID=XP_007902977.1-R1-1-A1-E2;Parent=XP_007902977.1-R1-1-A1
NW_018045609.1	genBlastG	coding_exon	2123	2158	.	-	.	ID=XP_007902977.1-R1-1-A1-E3;Parent=XP_007902977.1-R1-1-A1
NW_018045609.1	genBlastG	coding_exon	2058	2065	.	-	.	ID=XP_007902977.1-R1-1-A1-E4;Parent=XP_007902977.1-R1-1-A1
NW_018033363.1	genBlastG	transcript	43129	85520	131.6	-	.	ID=XP_007902993.1-R1-1-A1;Name=XP_007902993.1;PID=54.87;Coverage=78.56;Note=PID:54.87-Cover:78.56
NW_018033363.1	genBlastG	coding_exon	85455	85520	.	-	.	ID=XP_007902993.1-R1-1-A1-E1;Parent=XP_007902993.1-R1-1-A1
NW_018033363.1	genBlastG	coding_exon	84256	84602	.	-	.	ID=XP_007902993.1-R1-1-A1-E2;Parent=XP_007902993.1-R1-1-A1
NW_018033363.1	genBlastG	coding_exon	66665	66859	.	-	.	ID=XP_007902993.1-R1-1-A1-E3;Parent=XP_007902993.1-R1-1-A1
NW_018033363.1	genBlastG	coding_exon	60372	60530	.	-	.	ID=XP_007902993.1-R1-1-A1-E4;Parent=XP_007902993.1-R1-1-A1
NW_018033363.1	genBlastG	coding_exon	57616	57751	.	-	.	ID=XP_007902993.1-R1-1-A1-E5;Parent=XP_007902993.1-R1-1-A1
NW_018033363.1	genBlastG	coding_exon	54360	54484	.	-	.	ID=XP_007902993.1-R1-1-A1-E6;Parent=XP_007902993.1-R1-1-A1
NW_018033363.1	genBlastG	coding_exon	43129	43312	.	-	.	ID=XP_007902993.1-R1-1-A1-E7;Parent=XP_007902993.1-R1-1-A1
NW_018054083.1	genBlastG	transcript	4261	6220	15.5	+	.	ID=XP_007903061.1-R1-1-A1;Name=XP_007903061.1;PID=40.16;Coverage=100;Note=PID:40.16-Cover:100
NW_018054083.1	genBlastG	coding_exon	4261	4263	.	+	.	ID=XP_007903061.1-R1-1-A1-E1;Parent=XP_007903061.1-R1-1-A1
NW_018054083.1	genBlastG	coding_exon	5019	5160	.	+	.	ID=XP_007903061.1-R1-1-A1-E2;Parent=XP_007903061.1-R1-1-A1
NW_018054083.1	genBlastG	coding_exon	6051	6220	.	+	.	ID=XP_007903061.1-R1-1-A1-E3;Parent=XP_007903061.1-R1-1-A1
NW_018049883.1	genBlastG	transcript	1747	2320	19	+	.	ID=XP_007903072.1-R1-1-A1;Name=XP_007903072.1;PID=38.26;Coverage=54.05;Note=PID:38.26-Cover:54.05
NW_018049883.1	genBlastG	coding_exon	1747	1752	.	+	.	ID=XP_007903072.1-R1-1-A1-E1;Parent=XP_007903072.1-R1-1-A1
NW_018049883.1	genBlastG	coding_exon	2084	2320	.	+	.	ID=XP_007903072.1-R1-1-A1-E2;Parent=XP_007903072.1-R1-1-A1
NW_018038635.1	genBlastG	transcript	137169	138611	55.98	+	.	ID=XP_007903098.1-R1-1-A1;Name=XP_007903098.1;PID=28.07;Coverage=59.51;Note=PID:28.07-Cover:59.51
NW_018038635.1	genBlastG	coding_exon	137169	137208	.	+	.	ID=XP_007903098.1-R1-1-A1-E1;Parent=XP_007903098.1-R1-1-A1
NW_018038635.1	genBlastG	coding_exon	137626	138611	.	+	.	ID=XP_007903098.1-R1-1-A1-E2;Parent=XP_007903098.1-R1-1-A1
NW_018028508.1	genBlastG	transcript	221594	223300	66.9	-	.	ID=XP_007903300.1-R1-1-A1;Name=XP_007903300.1;PID=33.72;Coverage=96.03;Note=PID:33.72-Cover:96.03
NW_018028508.1	genBlastG	coding_exon	222207	223300	.	-	.	ID=XP_007903300.1-R1-1-A1-E1;Parent=XP_007903300.1-R1-1-A1
NW_018028508.1	genBlastG	coding_exon	221594	222173	.	-	.	ID=XP_007903300.1-R1-1-A1-E2;Parent=XP_007903300.1-R1-1-A1
NW_018056009.1	genBlastG	transcript	41691	43293	10.75	+	.	ID=XP_007903582.1-R1-1-A1;Name=XP_007903582.1;PID=38.39;Coverage=62.96;Note=PID:38.39-Cover:62.96
NW_018056009.1	genBlastG	coding_exon	41691	41711	.	+	.	ID=XP_007903582.1-R1-1-A1-E1;Parent=XP_007903582.1-R1-1-A1
NW_018056009.1	genBlastG	coding_exon	42433	42532	.	+	.	ID=XP_007903582.1-R1-1-A1-E2;Parent=XP_007903582.1-R1-1-A1
NW_018056009.1	genBlastG	coding_exon	42545	42612	.	+	.	ID=XP_007903582.1-R1-1-A1-E3;Parent=XP_007903582.1-R1-1-A1
NW_018056009.1	genBlastG	coding_exon	43276	43293	.	+	.	ID=XP_007903582.1-R1-1-A1-E4;Parent=XP_007903582.1-R1-1-A1
NW_018038516.1	genBlastG	transcript	17118	18650	21.99	-	.	ID=XP_007903652.1-R1-1-A1;Name=XP_007903652.1;PID=26.21;Coverage=100;Note=PID:26.21-Cover:100
NW_018038516.1	genBlastG	coding_exon	17118	18650	.	-	.	ID=XP_007903652.1-R1-1-A1-E1;Parent=XP_007903652.1-R1-1-A1
NW_018045354.1	genBlastG	transcript	19922	20770	6.718	-	.	ID=XP_007903696.1-R1-1-A1;Name=XP_007903696.1;PID=22.9;Coverage=38.52;Note=PID:22.9-Cover:38.52
NW_018045354.1	genBlastG	coding_exon	19922	20770	.	-	.	ID=XP_007903696.1-R1-1-A1-E1;Parent=XP_007903696.1-R1-1-A1
NW_018040114.1	genBlastG	transcript	45641	46651	54.55	+	.	ID=XP_007903734.1-R1-1-A1;Name=XP_007903734.1;PID=33.56;Coverage=92.56;Note=PID:33.56-Cover:92.56
NW_018040114.1	genBlastG	coding_exon	45641	46651	.	+	.	ID=XP_007903734.1-R1-1-A1-E1;Parent=XP_007903734.1-R1-1-A1
NW_018071507.1	genBlastG	transcript	2363	5018	164.3	-	.	ID=XP_007904131.1-R1-1-A1;Name=XP_007904131.1;PID=24.66;Coverage=35.8;Note=PID:24.66-Cover:35.8
NW_018071507.1	genBlastG	coding_exon	5005	5018	.	-	.	ID=XP_007904131.1-R1-1-A1-E1;Parent=XP_007904131.1-R1-1-A1
NW_018071507.1	genBlastG	coding_exon	4834	4968	.	-	.	ID=XP_007904131.1-R1-1-A1-E2;Parent=XP_007904131.1-R1-1-A1
NW_018071507.1	genBlastG	coding_exon	3806	4288	.	-	.	ID=XP_007904131.1-R1-1-A1-E3;Parent=XP_007904131.1-R1-1-A1
NW_018071507.1	genBlastG	coding_exon	3318	3760	.	-	.	ID=XP_007904131.1-R1-1-A1-E4;Parent=XP_007904131.1-R1-1-A1
NW_018071507.1	genBlastG	coding_exon	2514	3298	.	-	.	ID=XP_007904131.1-R1-1-A1-E5;Parent=XP_007904131.1-R1-1-A1
NW_018071507.1	genBlastG	coding_exon	2363	2467	.	-	.	ID=XP_007904131.1-R1-1-A1-E6;Parent=XP_007904131.1-R1-1-A1
NW_018046389.1	genBlastG	transcript	35745	37020	11.51	-	.	ID=XP_007904175.1-R1-1-A1;Name=XP_007904175.1;PID=25.5;Coverage=32.53;Note=PID:25.5-Cover:32.53
NW_018046389.1	genBlastG	coding_exon	36982	37020	.	-	.	ID=XP_007904175.1-R1-1-A1-E1;Parent=XP_007904175.1-R1-1-A1
NW_018046389.1	genBlastG	coding_exon	36950	36969	.	-	.	ID=XP_007904175.1-R1-1-A1-E2;Parent=XP_007904175.1-R1-1-A1
NW_018046389.1	genBlastG	coding_exon	36797	36921	.	-	.	ID=XP_007904175.1-R1-1-A1-E3;Parent=XP_007904175.1-R1-1-A1
NW_018046389.1	genBlastG	coding_exon	35862	35881	.	-	.	ID=XP_007904175.1-R1-1-A1-E4;Parent=XP_007904175.1-R1-1-A1
NW_018046389.1	genBlastG	coding_exon	35745	35786	.	-	.	ID=XP_007904175.1-R1-1-A1-E5;Parent=XP_007904175.1-R1-1-A1
NW_018028854.1	genBlastG	transcript	211266	214480	128.3	-	.	ID=XP_007904445.1-R1-1-A1;Name=XP_007904445.1;PID=33.51;Coverage=88.44;Note=PID:33.51-Cover:88.44
NW_018028854.1	genBlastG	coding_exon	214479	214480	.	-	.	ID=XP_007904445.1-R1-1-A1-E1;Parent=XP_007904445.1-R1-1-A1
NW_018028854.1	genBlastG	coding_exon	212708	214176	.	-	.	ID=XP_007904445.1-R1-1-A1-E2;Parent=XP_007904445.1-R1-1-A1
NW_018028854.1	genBlastG	coding_exon	212513	212686	.	-	.	ID=XP_007904445.1-R1-1-A1-E3;Parent=XP_007904445.1-R1-1-A1
NW_018028854.1	genBlastG	coding_exon	212049	212398	.	-	.	ID=XP_007904445.1-R1-1-A1-E4;Parent=XP_007904445.1-R1-1-A1
NW_018028854.1	genBlastG	coding_exon	211266	212027	.	-	.	ID=XP_007904445.1-R1-1-A1-E5;Parent=XP_007904445.1-R1-1-A1
NW_018034630.1	genBlastG	transcript	5162	14064	10.3	+	.	ID=XP_007904459.1-R1-1-A1;Name=XP_007904459.1;PID=50.51;Coverage=59.49;Note=PID:50.51-Cover:59.49
NW_018034630.1	genBlastG	coding_exon	5162	5193	.	+	.	ID=XP_007904459.1-R1-1-A1-E1;Parent=XP_007904459.1-R1-1-A1
NW_018034630.1	genBlastG	coding_exon	5272	5291	.	+	.	ID=XP_007904459.1-R1-1-A1-E2;Parent=XP_007904459.1-R1-1-A1
NW_018034630.1	genBlastG	coding_exon	5529	5632	.	+	.	ID=XP_007904459.1-R1-1-A1-E3;Parent=XP_007904459.1-R1-1-A1
NW_018034630.1	genBlastG	coding_exon	13870	14064	.	+	.	ID=XP_007904459.1-R1-1-A1-E4;Parent=XP_007904459.1-R1-1-A1
NW_018040111.1	genBlastG	transcript	93849	95253	60.93	-	.	ID=XP_007904501.1-R1-1-A1;Name=XP_007904501.1;PID=32.69;Coverage=97.41;Note=PID:32.69-Cover:97.41
NW_018040111.1	genBlastG	coding_exon	94286	95253	.	-	.	ID=XP_007904501.1-R1-1-A1-E1;Parent=XP_007904501.1-R1-1-A1
NW_018040111.1	genBlastG	coding_exon	94138	94261	.	-	.	ID=XP_007904501.1-R1-1-A1-E2;Parent=XP_007904501.1-R1-1-A1
NW_018040111.1	genBlastG	coding_exon	93849	94115	.	-	.	ID=XP_007904501.1-R1-1-A1-E3;Parent=XP_007904501.1-R1-1-A1
NW_018059316.1	genBlastG	transcript	45334	51200	37.79	+	.	ID=XP_007904597.1-R1-1-A1;Name=XP_007904597.1;PID=41.54;Coverage=78.49;Note=PID:41.54-Cover:78.49
NW_018059316.1	genBlastG	coding_exon	45334	45571	.	+	.	ID=XP_007904597.1-R1-1-A1-E1;Parent=XP_007904597.1-R1-1-A1
NW_018059316.1	genBlastG	coding_exon	51031	51200	.	+	.	ID=XP_007904597.1-R1-1-A1-E2;Parent=XP_007904597.1-R1-1-A1
NW_018039416.1	genBlastG	transcript	6543	7215	35.32	+	.	ID=XP_007904598.1-R1-1-A1;Name=XP_007904598.1;PID=33.81;Coverage=88.14;Note=PID:33.81-Cover:88.14
NW_018039416.1	genBlastG	coding_exon	6543	6557	.	+	.	ID=XP_007904598.1-R1-1-A1-E1;Parent=XP_007904598.1-R1-1-A1
NW_018039416.1	genBlastG	coding_exon	6586	6645	.	+	.	ID=XP_007904598.1-R1-1-A1-E2;Parent=XP_007904598.1-R1-1-A1
NW_018039416.1	genBlastG	coding_exon	6667	7215	.	+	.	ID=XP_007904598.1-R1-1-A1-E3;Parent=XP_007904598.1-R1-1-A1
NW_018030393.1	genBlastG	transcript	318831	320368	17.5	-	.	ID=XP_007904754.1-R1-1-A1;Name=XP_007904754.1;PID=14.4;Coverage=19;Note=PID:14.4-Cover:19
NW_018030393.1	genBlastG	coding_exon	320352	320368	.	-	.	ID=XP_007904754.1-R1-1-A1-E1;Parent=XP_007904754.1-R1-1-A1
NW_018030393.1	genBlastG	coding_exon	320284	320306	.	-	.	ID=XP_007904754.1-R1-1-A1-E2;Parent=XP_007904754.1-R1-1-A1
NW_018030393.1	genBlastG	coding_exon	319417	319613	.	-	.	ID=XP_007904754.1-R1-1-A1-E3;Parent=XP_007904754.1-R1-1-A1
NW_018030393.1	genBlastG	coding_exon	318831	318881	.	-	.	ID=XP_007904754.1-R1-1-A1-E4;Parent=XP_007904754.1-R1-1-A1
NW_018035520.1	genBlastG	transcript	108948	110056	18.79	-	.	ID=XP_007904828.1-R1-1-A1;Name=XP_007904828.1;PID=37.74;Coverage=78.92;Note=PID:37.74-Cover:78.92
NW_018035520.1	genBlastG	coding_exon	109920	110056	.	-	.	ID=XP_007904828.1-R1-1-A1-E1;Parent=XP_007904828.1-R1-1-A1
NW_018035520.1	genBlastG	coding_exon	109729	109880	.	-	.	ID=XP_007904828.1-R1-1-A1-E2;Parent=XP_007904828.1-R1-1-A1
NW_018035520.1	genBlastG	coding_exon	108948	109099	.	-	.	ID=XP_007904828.1-R1-1-A1-E3;Parent=XP_007904828.1-R1-1-A1
NW_018035520.1	genBlastG	transcript	157940	159090	104.2	-	.	ID=XP_007904834.1-R1-1-A1;Name=XP_007904834.1;PID=61.97;Coverage=100;Note=PID:61.97-Cover:100
NW_018035520.1	genBlastG	coding_exon	158119	159090	.	-	.	ID=XP_007904834.1-R1-1-A1-E1;Parent=XP_007904834.1-R1-1-A1
NW_018035520.1	genBlastG	coding_exon	157940	158005	.	-	.	ID=XP_007904834.1-R1-1-A1-E2;Parent=XP_007904834.1-R1-1-A1
NW_018030071.1	genBlastG	transcript	11248	11611	20	+	.	ID=XP_007904878.1-R1-1-A1;Name=XP_007904878.1;PID=68.18;Coverage=78.46;Note=PID:68.18-Cover:78.46
NW_018030071.1	genBlastG	coding_exon	11248	11269	.	+	.	ID=XP_007904878.1-R1-1-A1-E1;Parent=XP_007904878.1-R1-1-A1
NW_018030071.1	genBlastG	coding_exon	11478	11611	.	+	.	ID=XP_007904878.1-R1-1-A1-E2;Parent=XP_007904878.1-R1-1-A1
NW_018070505.1	genBlastG	transcript	38901	40013	19.55	-	.	ID=XP_007905096.1-R1-1-A1;Name=XP_007905096.1;PID=17.02;Coverage=24.69;Note=PID:17.02-Cover:24.69
NW_018070505.1	genBlastG	coding_exon	39956	40013	.	-	.	ID=XP_007905096.1-R1-1-A1-E1;Parent=XP_007905096.1-R1-1-A1
NW_018070505.1	genBlastG	coding_exon	39889	39937	.	-	.	ID=XP_007905096.1-R1-1-A1-E2;Parent=XP_007905096.1-R1-1-A1
NW_018070505.1	genBlastG	coding_exon	39776	39861	.	-	.	ID=XP_007905096.1-R1-1-A1-E3;Parent=XP_007905096.1-R1-1-A1
NW_018070505.1	genBlastG	coding_exon	38901	39127	.	-	.	ID=XP_007905096.1-R1-1-A1-E4;Parent=XP_007905096.1-R1-1-A1
NW_018070505.1	genBlastG	transcript	29960	30656	13	+	.	ID=XP_007905097.1-R1-1-A1;Name=XP_007905097.1;PID=36.04;Coverage=69.07;Note=PID:36.04-Cover:69.07
NW_018070505.1	genBlastG	coding_exon	29960	29970	.	+	.	ID=XP_007905097.1-R1-1-A1-E1;Parent=XP_007905097.1-R1-1-A1
NW_018070505.1	genBlastG	coding_exon	30464	30656	.	+	.	ID=XP_007905097.1-R1-1-A1-E2;Parent=XP_007905097.1-R1-1-A1
NW_018028816.1	genBlastG	transcript	8864	9688	17.37	-	.	ID=XP_007905130.1-R1-1-A1;Name=XP_007905130.1;PID=17.09;Coverage=27.44;Note=PID:17.09-Cover:27.44
NW_018028816.1	genBlastG	coding_exon	9515	9688	.	-	.	ID=XP_007905130.1-R1-1-A1-E1;Parent=XP_007905130.1-R1-1-A1
NW_018028816.1	genBlastG	coding_exon	9227	9309	.	-	.	ID=XP_007905130.1-R1-1-A1-E2;Parent=XP_007905130.1-R1-1-A1
NW_018028816.1	genBlastG	coding_exon	9178	9211	.	-	.	ID=XP_007905130.1-R1-1-A1-E3;Parent=XP_007905130.1-R1-1-A1
NW_018028816.1	genBlastG	coding_exon	9113	9132	.	-	.	ID=XP_007905130.1-R1-1-A1-E4;Parent=XP_007905130.1-R1-1-A1
NW_018028816.1	genBlastG	coding_exon	9067	9079	.	-	.	ID=XP_007905130.1-R1-1-A1-E5;Parent=XP_007905130.1-R1-1-A1
NW_018028816.1	genBlastG	coding_exon	8864	8956	.	-	.	ID=XP_007905130.1-R1-1-A1-E6;Parent=XP_007905130.1-R1-1-A1
NW_018028585.1	genBlastG	transcript	460214	460507	17.37	+	.	ID=XP_007905130.1-R1-2-A1;Name=XP_007905130.1;PID=7.952;Coverage=8.748;Note=PID:7.952-Cover:8.748
NW_018028585.1	genBlastG	coding_exon	460214	460255	.	+	.	ID=XP_007905130.1-R1-2-A1-E1;Parent=XP_007905130.1-R1-2-A1
NW_018028585.1	genBlastG	coding_exon	460415	460507	.	+	.	ID=XP_007905130.1-R1-2-A1-E2;Parent=XP_007905130.1-R1-2-A1
NW_018027468.1	genBlastG	transcript	37152	44534	37.05	-	.	ID=XP_007905171.1-R1-1-A1;Name=XP_007905171.1;PID=37.29;Coverage=83.18;Note=PID:37.29-Cover:83.18
NW_018027468.1	genBlastG	coding_exon	44524	44534	.	-	.	ID=XP_007905171.1-R1-1-A1-E1;Parent=XP_007905171.1-R1-1-A1
NW_018027468.1	genBlastG	coding_exon	44367	44478	.	-	.	ID=XP_007905171.1-R1-1-A1-E2;Parent=XP_007905171.1-R1-1-A1
NW_018027468.1	genBlastG	coding_exon	43443	43581	.	-	.	ID=XP_007905171.1-R1-1-A1-E3;Parent=XP_007905171.1-R1-1-A1
NW_018027468.1	genBlastG	coding_exon	41924	42235	.	-	.	ID=XP_007905171.1-R1-1-A1-E4;Parent=XP_007905171.1-R1-1-A1
NW_018027468.1	genBlastG	coding_exon	37152	37396	.	-	.	ID=XP_007905171.1-R1-1-A1-E5;Parent=XP_007905171.1-R1-1-A1
NW_018049728.1	genBlastG	transcript	34378	34864	33.5	+	.	ID=XP_007905392.1-R1-1-A1;Name=XP_007905392.1;PID=50.67;Coverage=89.23;Note=PID:50.67-Cover:89.23
NW_018049728.1	genBlastG	coding_exon	34378	34445	.	+	.	ID=XP_007905392.1-R1-1-A1-E1;Parent=XP_007905392.1-R1-1-A1
NW_018049728.1	genBlastG	coding_exon	34582	34864	.	+	.	ID=XP_007905392.1-R1-1-A1-E2;Parent=XP_007905392.1-R1-1-A1
NW_018038215.1	genBlastG	transcript	169240	169419	27	+	.	ID=XP_007905408.1-R1-1-A1;Name=XP_007905408.1;PID=84.13;Coverage=93.65;Note=PID:84.13-Cover:93.65
NW_018038215.1	genBlastG	coding_exon	169240	169419	.	+	.	ID=XP_007905408.1-R1-1-A1-E1;Parent=XP_007905408.1-R1-1-A1
NW_018066130.1	genBlastG	transcript	20762	22193	51.89	+	.	ID=XP_007905564.1-R1-1-A1;Name=XP_007905564.1;PID=33.92;Coverage=81.98;Note=PID:33.92-Cover:81.98
NW_018066130.1	genBlastG	coding_exon	20762	20971	.	+	.	ID=XP_007905564.1-R1-1-A1-E1;Parent=XP_007905564.1-R1-1-A1
NW_018066130.1	genBlastG	coding_exon	20996	21093	.	+	.	ID=XP_007905564.1-R1-1-A1-E2;Parent=XP_007905564.1-R1-1-A1
NW_018066130.1	genBlastG	coding_exon	21133	21234	.	+	.	ID=XP_007905564.1-R1-1-A1-E3;Parent=XP_007905564.1-R1-1-A1
NW_018066130.1	genBlastG	coding_exon	21262	21535	.	+	.	ID=XP_007905564.1-R1-1-A1-E4;Parent=XP_007905564.1-R1-1-A1
NW_018066130.1	genBlastG	coding_exon	21572	21634	.	+	.	ID=XP_007905564.1-R1-1-A1-E5;Parent=XP_007905564.1-R1-1-A1
NW_018066130.1	genBlastG	coding_exon	21665	21805	.	+	.	ID=XP_007905564.1-R1-1-A1-E6;Parent=XP_007905564.1-R1-1-A1
NW_018066130.1	genBlastG	coding_exon	22110	22193	.	+	.	ID=XP_007905564.1-R1-1-A1-E7;Parent=XP_007905564.1-R1-1-A1
NW_018047701.1	genBlastG	transcript	887	1423	15.5	-	.	ID=XP_007905647.1-R1-1-A1;Name=XP_007905647.1;PID=27.51;Coverage=87.68;Note=PID:27.51-Cover:87.68
NW_018047701.1	genBlastG	coding_exon	887	1423	.	-	.	ID=XP_007905647.1-R1-1-A1-E1;Parent=XP_007905647.1-R1-1-A1
NW_018041907.1	genBlastG	transcript	77878	78285	12.41	+	.	ID=XP_007905737.1-R1-1-A1;Name=XP_007905737.1;PID=32;Coverage=38.78;Note=PID:32-Cover:38.78
NW_018041907.1	genBlastG	coding_exon	77878	77881	.	+	.	ID=XP_007905737.1-R1-1-A1-E1;Parent=XP_007905737.1-R1-1-A1
NW_018041907.1	genBlastG	coding_exon	78173	78285	.	+	.	ID=XP_007905737.1-R1-1-A1-E2;Parent=XP_007905737.1-R1-1-A1
NW_018046119.1	genBlastG	transcript	2450	13706	29.16	+	.	ID=XP_007906110.1-R1-1-A1;Name=XP_007906110.1;PID=42.29;Coverage=85.97;Note=PID:42.29-Cover:85.97
NW_018046119.1	genBlastG	coding_exon	2450	2456	.	+	.	ID=XP_007906110.1-R1-1-A1-E1;Parent=XP_007906110.1-R1-1-A1
NW_018046119.1	genBlastG	coding_exon	2636	2749	.	+	.	ID=XP_007906110.1-R1-1-A1-E2;Parent=XP_007906110.1-R1-1-A1
NW_018046119.1	genBlastG	coding_exon	12735	12886	.	+	.	ID=XP_007906110.1-R1-1-A1-E3;Parent=XP_007906110.1-R1-1-A1
NW_018046119.1	genBlastG	coding_exon	13368	13424	.	+	.	ID=XP_007906110.1-R1-1-A1-E4;Parent=XP_007906110.1-R1-1-A1
NW_018046119.1	genBlastG	coding_exon	13464	13706	.	+	.	ID=XP_007906110.1-R1-1-A1-E5;Parent=XP_007906110.1-R1-1-A1
NW_018070701.1	genBlastG	transcript	8167	9121	18	+	.	ID=XP_007906113.1-R1-1-A1;Name=XP_007906113.1;PID=17.6;Coverage=29.24;Note=PID:17.6-Cover:29.24
NW_018070701.1	genBlastG	coding_exon	8167	8225	.	+	.	ID=XP_007906113.1-R1-1-A1-E1;Parent=XP_007906113.1-R1-1-A1
NW_018070701.1	genBlastG	coding_exon	8412	8739	.	+	.	ID=XP_007906113.1-R1-1-A1-E2;Parent=XP_007906113.1-R1-1-A1
NW_018070701.1	genBlastG	coding_exon	9035	9121	.	+	.	ID=XP_007906113.1-R1-1-A1-E3;Parent=XP_007906113.1-R1-1-A1
NW_018032642.1	genBlastG	transcript	144739	173380	143.1	+	.	ID=XP_007906270.1-R1-1-A1;Name=XP_007906270.1;PID=51.52;Coverage=87.84;Note=PID:51.52-Cover:87.84
NW_018032642.1	genBlastG	coding_exon	144739	144809	.	+	.	ID=XP_007906270.1-R1-1-A1-E1;Parent=XP_007906270.1-R1-1-A1
NW_018032642.1	genBlastG	coding_exon	145246	145400	.	+	.	ID=XP_007906270.1-R1-1-A1-E2;Parent=XP_007906270.1-R1-1-A1
NW_018032642.1	genBlastG	coding_exon	146372	146579	.	+	.	ID=XP_007906270.1-R1-1-A1-E3;Parent=XP_007906270.1-R1-1-A1
NW_018032642.1	genBlastG	coding_exon	155597	155786	.	+	.	ID=XP_007906270.1-R1-1-A1-E4;Parent=XP_007906270.1-R1-1-A1
NW_018032642.1	genBlastG	coding_exon	158476	158638	.	+	.	ID=XP_007906270.1-R1-1-A1-E5;Parent=XP_007906270.1-R1-1-A1
NW_018032642.1	genBlastG	coding_exon	160204	160279	.	+	.	ID=XP_007906270.1-R1-1-A1-E6;Parent=XP_007906270.1-R1-1-A1
NW_018032642.1	genBlastG	coding_exon	161394	161527	.	+	.	ID=XP_007906270.1-R1-1-A1-E7;Parent=XP_007906270.1-R1-1-A1
NW_018032642.1	genBlastG	coding_exon	164030	164147	.	+	.	ID=XP_007906270.1-R1-1-A1-E8;Parent=XP_007906270.1-R1-1-A1
NW_018032642.1	genBlastG	coding_exon	166970	167071	.	+	.	ID=XP_007906270.1-R1-1-A1-E9;Parent=XP_007906270.1-R1-1-A1
NW_018032642.1	genBlastG	coding_exon	168678	168841	.	+	.	ID=XP_007906270.1-R1-1-A1-E10;Parent=XP_007906270.1-R1-1-A1
NW_018032642.1	genBlastG	coding_exon	172345	172482	.	+	.	ID=XP_007906270.1-R1-1-A1-E11;Parent=XP_007906270.1-R1-1-A1
NW_018032642.1	genBlastG	coding_exon	173142	173380	.	+	.	ID=XP_007906270.1-R1-1-A1-E12;Parent=XP_007906270.1-R1-1-A1
NW_018042824.1	genBlastG	transcript	15408	16796	7.7	-	.	ID=XP_007906412.1-R1-1-A1;Name=XP_007906412.1;PID=29.17;Coverage=69.13;Note=PID:29.17-Cover:69.13
NW_018042824.1	genBlastG	coding_exon	16537	16796	.	-	.	ID=XP_007906412.1-R1-1-A1-E1;Parent=XP_007906412.1-R1-1-A1
NW_018042824.1	genBlastG	coding_exon	15767	16322	.	-	.	ID=XP_007906412.1-R1-1-A1-E2;Parent=XP_007906412.1-R1-1-A1
NW_018042824.1	genBlastG	coding_exon	15522	15563	.	-	.	ID=XP_007906412.1-R1-1-A1-E3;Parent=XP_007906412.1-R1-1-A1
NW_018042824.1	genBlastG	coding_exon	15408	15506	.	-	.	ID=XP_007906412.1-R1-1-A1-E4;Parent=XP_007906412.1-R1-1-A1
NW_018039704.1	genBlastG	transcript	11750	13141	124.7	+	.	ID=XP_007906502.1-R1-1-A1;Name=XP_007906502.1;PID=52.8;Coverage=93.63;Note=PID:52.8-Cover:93.63
NW_018039704.1	genBlastG	coding_exon	11750	12073	.	+	.	ID=XP_007906502.1-R1-1-A1-E1;Parent=XP_007906502.1-R1-1-A1
NW_018039704.1	genBlastG	coding_exon	12122	12643	.	+	.	ID=XP_007906502.1-R1-1-A1-E2;Parent=XP_007906502.1-R1-1-A1
NW_018039704.1	genBlastG	coding_exon	12662	13141	.	+	.	ID=XP_007906502.1-R1-1-A1-E3;Parent=XP_007906502.1-R1-1-A1
NW_018030665.1	genBlastG	transcript	91704	92510	24.33	-	.	ID=XP_007906558.1-R1-1-A1;Name=XP_007906558.1;PID=43.01;Coverage=74.07;Note=PID:43.01-Cover:74.07
NW_018030665.1	genBlastG	coding_exon	92155	92510	.	-	.	ID=XP_007906558.1-R1-1-A1-E1;Parent=XP_007906558.1-R1-1-A1
NW_018030665.1	genBlastG	coding_exon	91704	92130	.	-	.	ID=XP_007906558.1-R1-1-A1-E2;Parent=XP_007906558.1-R1-1-A1
NW_018041882.1	genBlastG	transcript	25008	25301	45.03	+	.	ID=XP_007906582.1-R1-1-A1;Name=XP_007906582.1;PID=93.81;Coverage=100;Note=PID:93.81-Cover:100
NW_018041882.1	genBlastG	coding_exon	25008	25301	.	+	.	ID=XP_007906582.1-R1-1-A1-E1;Parent=XP_007906582.1-R1-1-A1
NW_018032370.1	genBlastG	transcript	117733	118943	13.66	-	.	ID=XP_007906628.1-R1-1-A1;Name=XP_007906628.1;PID=32.54;Coverage=100;Note=PID:32.54-Cover:100
NW_018032370.1	genBlastG	coding_exon	118830	118943	.	-	.	ID=XP_007906628.1-R1-1-A1-E1;Parent=XP_007906628.1-R1-1-A1
NW_018032370.1	genBlastG	coding_exon	118213	118269	.	-	.	ID=XP_007906628.1-R1-1-A1-E2;Parent=XP_007906628.1-R1-1-A1
NW_018032370.1	genBlastG	coding_exon	117733	118131	.	-	.	ID=XP_007906628.1-R1-1-A1-E3;Parent=XP_007906628.1-R1-1-A1
NW_018027604.1	genBlastG	transcript	274468	290313	40.17	+	.	ID=XP_007906674.1-R1-1-A1;Name=XP_007906674.1;PID=23.35;Coverage=40.74;Note=PID:23.35-Cover:40.74
NW_018027604.1	genBlastG	coding_exon	274468	274668	.	+	.	ID=XP_007906674.1-R1-1-A1-E1;Parent=XP_007906674.1-R1-1-A1
NW_018027604.1	genBlastG	coding_exon	275000	275183	.	+	.	ID=XP_007906674.1-R1-1-A1-E2;Parent=XP_007906674.1-R1-1-A1
NW_018027604.1	genBlastG	coding_exon	275199	275238	.	+	.	ID=XP_007906674.1-R1-1-A1-E3;Parent=XP_007906674.1-R1-1-A1
NW_018027604.1	genBlastG	coding_exon	275272	275393	.	+	.	ID=XP_007906674.1-R1-1-A1-E4;Parent=XP_007906674.1-R1-1-A1
NW_018027604.1	genBlastG	coding_exon	281234	281463	.	+	.	ID=XP_007906674.1-R1-1-A1-E5;Parent=XP_007906674.1-R1-1-A1
NW_018027604.1	genBlastG	coding_exon	289993	290313	.	+	.	ID=XP_007906674.1-R1-1-A1-E6;Parent=XP_007906674.1-R1-1-A1
NW_018069746.1	genBlastG	transcript	612	4430	77.93	+	.	ID=XP_007907034.1-R1-1-A1;Name=XP_007907034.1;PID=37.36;Coverage=64.23;Note=PID:37.36-Cover:64.23
NW_018069746.1	genBlastG	coding_exon	612	1430	.	+	.	ID=XP_007907034.1-R1-1-A1-E1;Parent=XP_007907034.1-R1-1-A1
NW_018069746.1	genBlastG	coding_exon	1450	1699	.	+	.	ID=XP_007907034.1-R1-1-A1-E2;Parent=XP_007907034.1-R1-1-A1
NW_018069746.1	genBlastG	coding_exon	2270	2806	.	+	.	ID=XP_007907034.1-R1-1-A1-E3;Parent=XP_007907034.1-R1-1-A1
NW_018069746.1	genBlastG	coding_exon	2835	2974	.	+	.	ID=XP_007907034.1-R1-1-A1-E4;Parent=XP_007907034.1-R1-1-A1
NW_018069746.1	genBlastG	coding_exon	2987	3249	.	+	.	ID=XP_007907034.1-R1-1-A1-E5;Parent=XP_007907034.1-R1-1-A1
NW_018069746.1	genBlastG	coding_exon	3272	3384	.	+	.	ID=XP_007907034.1-R1-1-A1-E6;Parent=XP_007907034.1-R1-1-A1
NW_018069746.1	genBlastG	coding_exon	3527	4197	.	+	.	ID=XP_007907034.1-R1-1-A1-E7;Parent=XP_007907034.1-R1-1-A1
NW_018069746.1	genBlastG	coding_exon	4236	4430	.	+	.	ID=XP_007907034.1-R1-1-A1-E8;Parent=XP_007907034.1-R1-1-A1
NW_018052945.1	genBlastG	transcript	2373	3712	16	-	.	ID=XP_007907107.1-R1-1-A1;Name=XP_007907107.1;PID=25.89;Coverage=44.36;Note=PID:25.89-Cover:44.36
NW_018052945.1	genBlastG	coding_exon	3674	3712	.	-	.	ID=XP_007907107.1-R1-1-A1-E1;Parent=XP_007907107.1-R1-1-A1
NW_018052945.1	genBlastG	coding_exon	2844	2990	.	-	.	ID=XP_007907107.1-R1-1-A1-E2;Parent=XP_007907107.1-R1-1-A1
NW_018052945.1	genBlastG	coding_exon	2600	2627	.	-	.	ID=XP_007907107.1-R1-1-A1-E3;Parent=XP_007907107.1-R1-1-A1
NW_018052945.1	genBlastG	coding_exon	2373	2527	.	-	.	ID=XP_007907107.1-R1-1-A1-E4;Parent=XP_007907107.1-R1-1-A1
NW_018050848.1	genBlastG	transcript	383	20620	0.8815	+	.	ID=XP_007907153.1-R1-1-A1;Name=XP_007907153.1;PID=36.76;Coverage=60.84;Note=PID:36.76-Cover:60.84
NW_018050848.1	genBlastG	coding_exon	383	402	.	+	.	ID=XP_007907153.1-R1-1-A1-E1;Parent=XP_007907153.1-R1-1-A1
NW_018050848.1	genBlastG	coding_exon	418	476	.	+	.	ID=XP_007907153.1-R1-1-A1-E2;Parent=XP_007907153.1-R1-1-A1
NW_018050848.1	genBlastG	coding_exon	498	558	.	+	.	ID=XP_007907153.1-R1-1-A1-E3;Parent=XP_007907153.1-R1-1-A1
NW_018050848.1	genBlastG	coding_exon	1081	1241	.	+	.	ID=XP_007907153.1-R1-1-A1-E4;Parent=XP_007907153.1-R1-1-A1
NW_018050848.1	genBlastG	coding_exon	4014	4131	.	+	.	ID=XP_007907153.1-R1-1-A1-E5;Parent=XP_007907153.1-R1-1-A1
NW_018050848.1	genBlastG	coding_exon	7932	8095	.	+	.	ID=XP_007907153.1-R1-1-A1-E6;Parent=XP_007907153.1-R1-1-A1
NW_018050848.1	genBlastG	coding_exon	11076	11210	.	+	.	ID=XP_007907153.1-R1-1-A1-E7;Parent=XP_007907153.1-R1-1-A1
NW_018050848.1	genBlastG	coding_exon	12417	12592	.	+	.	ID=XP_007907153.1-R1-1-A1-E8;Parent=XP_007907153.1-R1-1-A1
NW_018050848.1	genBlastG	coding_exon	15557	15646	.	+	.	ID=XP_007907153.1-R1-1-A1-E9;Parent=XP_007907153.1-R1-1-A1
NW_018050848.1	genBlastG	coding_exon	20026	20273	.	+	.	ID=XP_007907153.1-R1-1-A1-E10;Parent=XP_007907153.1-R1-1-A1
NW_018050848.1	genBlastG	coding_exon	20443	20502	.	+	.	ID=XP_007907153.1-R1-1-A1-E11;Parent=XP_007907153.1-R1-1-A1
NW_018050848.1	genBlastG	coding_exon	20521	20620	.	+	.	ID=XP_007907153.1-R1-1-A1-E12;Parent=XP_007907153.1-R1-1-A1
NW_018044573.1	genBlastG	transcript	12883	19447	14.23	-	.	ID=XP_007907228.1-R1-1-A1;Name=XP_007907228.1;PID=19.08;Coverage=28.83;Note=PID:19.08-Cover:28.83
NW_018044573.1	genBlastG	coding_exon	19298	19447	.	-	.	ID=XP_007907228.1-R1-1-A1-E1;Parent=XP_007907228.1-R1-1-A1
NW_018044573.1	genBlastG	coding_exon	18805	19014	.	-	.	ID=XP_007907228.1-R1-1-A1-E2;Parent=XP_007907228.1-R1-1-A1
NW_018044573.1	genBlastG	coding_exon	18289	18408	.	-	.	ID=XP_007907228.1-R1-1-A1-E3;Parent=XP_007907228.1-R1-1-A1
NW_018044573.1	genBlastG	coding_exon	13518	13757	.	-	.	ID=XP_007907228.1-R1-1-A1-E4;Parent=XP_007907228.1-R1-1-A1
NW_018044573.1	genBlastG	coding_exon	12883	12939	.	-	.	ID=XP_007907228.1-R1-1-A1-E5;Parent=XP_007907228.1-R1-1-A1
NW_018029040.1	genBlastG	transcript	412846	415629	234.2	-	.	ID=XP_007907625.1-R1-1-A1;Name=XP_007907625.1;PID=53.59;Coverage=97.28;Note=PID:53.59-Cover:97.28
NW_018029040.1	genBlastG	coding_exon	413610	415629	.	-	.	ID=XP_007907625.1-R1-1-A1-E1;Parent=XP_007907625.1-R1-1-A1
NW_018029040.1	genBlastG	coding_exon	413274	413585	.	-	.	ID=XP_007907625.1-R1-1-A1-E2;Parent=XP_007907625.1-R1-1-A1
NW_018029040.1	genBlastG	coding_exon	412846	413198	.	-	.	ID=XP_007907625.1-R1-1-A1-E3;Parent=XP_007907625.1-R1-1-A1
NW_018035641.1	genBlastG	transcript	143167	143594	12	-	.	ID=XP_007907652.1-R1-1-A1;Name=XP_007907652.1;PID=32.54;Coverage=62.5;Note=PID:32.54-Cover:62.5
NW_018035641.1	genBlastG	coding_exon	143561	143594	.	-	.	ID=XP_007907652.1-R1-1-A1-E1;Parent=XP_007907652.1-R1-1-A1
NW_018035641.1	genBlastG	coding_exon	143167	143345	.	-	.	ID=XP_007907652.1-R1-1-A1-E2;Parent=XP_007907652.1-R1-1-A1
NW_018046502.1	genBlastG	transcript	19020	39433	313.3	+	.	ID=XP_007907740.1-R1-1-A1;Name=XP_007907740.1;PID=62.38;Coverage=86.74;Note=PID:62.38-Cover:86.74
NW_018046502.1	genBlastG	coding_exon	19020	19326	.	+	.	ID=XP_007907740.1-R1-1-A1-E1;Parent=XP_007907740.1-R1-1-A1
NW_018046502.1	genBlastG	coding_exon	21245	21369	.	+	.	ID=XP_007907740.1-R1-1-A1-E2;Parent=XP_007907740.1-R1-1-A1
NW_018046502.1	genBlastG	coding_exon	21664	21791	.	+	.	ID=XP_007907740.1-R1-1-A1-E3;Parent=XP_007907740.1-R1-1-A1
NW_018046502.1	genBlastG	coding_exon	23689	25045	.	+	.	ID=XP_007907740.1-R1-1-A1-E4;Parent=XP_007907740.1-R1-1-A1
NW_018046502.1	genBlastG	coding_exon	25099	25560	.	+	.	ID=XP_007907740.1-R1-1-A1-E5;Parent=XP_007907740.1-R1-1-A1
NW_018046502.1	genBlastG	coding_exon	27419	27483	.	+	.	ID=XP_007907740.1-R1-1-A1-E6;Parent=XP_007907740.1-R1-1-A1
NW_018046502.1	genBlastG	coding_exon	28141	28294	.	+	.	ID=XP_007907740.1-R1-1-A1-E7;Parent=XP_007907740.1-R1-1-A1
NW_018046502.1	genBlastG	coding_exon	29735	30018	.	+	.	ID=XP_007907740.1-R1-1-A1-E8;Parent=XP_007907740.1-R1-1-A1
NW_018046502.1	genBlastG	coding_exon	30374	30414	.	+	.	ID=XP_007907740.1-R1-1-A1-E9;Parent=XP_007907740.1-R1-1-A1
NW_018046502.1	genBlastG	coding_exon	30461	30793	.	+	.	ID=XP_007907740.1-R1-1-A1-E10;Parent=XP_007907740.1-R1-1-A1
NW_018046502.1	genBlastG	coding_exon	32661	32724	.	+	.	ID=XP_007907740.1-R1-1-A1-E11;Parent=XP_007907740.1-R1-1-A1
NW_018046502.1	genBlastG	coding_exon	37213	37355	.	+	.	ID=XP_007907740.1-R1-1-A1-E12;Parent=XP_007907740.1-R1-1-A1
NW_018046502.1	genBlastG	coding_exon	38542	38675	.	+	.	ID=XP_007907740.1-R1-1-A1-E13;Parent=XP_007907740.1-R1-1-A1
NW_018046502.1	genBlastG	coding_exon	39302	39433	.	+	.	ID=XP_007907740.1-R1-1-A1-E14;Parent=XP_007907740.1-R1-1-A1
NW_018075640.1	genBlastG	transcript	120753	122529	27.12	-	.	ID=XP_007908094.1-R1-1-A1;Name=XP_007908094.1;PID=33.79;Coverage=75.68;Note=PID:33.79-Cover:75.68
NW_018075640.1	genBlastG	coding_exon	122525	122529	.	-	.	ID=XP_007908094.1-R1-1-A1-E1;Parent=XP_007908094.1-R1-1-A1
NW_018075640.1	genBlastG	coding_exon	121550	122006	.	-	.	ID=XP_007908094.1-R1-1-A1-E2;Parent=XP_007908094.1-R1-1-A1
NW_018075640.1	genBlastG	coding_exon	120753	120881	.	-	.	ID=XP_007908094.1-R1-1-A1-E3;Parent=XP_007908094.1-R1-1-A1
NW_018046806.1	genBlastG	transcript	8079	15459	-57.55	+	.	ID=XP_007908119.1-R1-1-A1;Name=XP_007908119.1;PID=23.49;Coverage=30.84;Note=PID:23.49-Cover:30.84
NW_018046806.1	genBlastG	coding_exon	8079	8166	.	+	.	ID=XP_007908119.1-R1-1-A1-E1;Parent=XP_007908119.1-R1-1-A1
NW_018046806.1	genBlastG	coding_exon	8244	8419	.	+	.	ID=XP_007908119.1-R1-1-A1-E2;Parent=XP_007908119.1-R1-1-A1
NW_018046806.1	genBlastG	coding_exon	15325	15459	.	+	.	ID=XP_007908119.1-R1-1-A1-E3;Parent=XP_007908119.1-R1-1-A1
NW_018033063.1	genBlastG	transcript	209968	212164	33.16	+	.	ID=XP_007908444.1-R1-1-A1;Name=XP_007908444.1;PID=22.61;Coverage=39.1;Note=PID:22.61-Cover:39.1
NW_018033063.1	genBlastG	coding_exon	209968	209989	.	+	.	ID=XP_007908444.1-R1-1-A1-E1;Parent=XP_007908444.1-R1-1-A1
NW_018033063.1	genBlastG	coding_exon	210032	210235	.	+	.	ID=XP_007908444.1-R1-1-A1-E2;Parent=XP_007908444.1-R1-1-A1
NW_018033063.1	genBlastG	coding_exon	210583	210602	.	+	.	ID=XP_007908444.1-R1-1-A1-E3;Parent=XP_007908444.1-R1-1-A1
NW_018033063.1	genBlastG	coding_exon	210660	211241	.	+	.	ID=XP_007908444.1-R1-1-A1-E4;Parent=XP_007908444.1-R1-1-A1
NW_018033063.1	genBlastG	coding_exon	212039	212060	.	+	.	ID=XP_007908444.1-R1-1-A1-E5;Parent=XP_007908444.1-R1-1-A1
NW_018033063.1	genBlastG	coding_exon	212076	212164	.	+	.	ID=XP_007908444.1-R1-1-A1-E6;Parent=XP_007908444.1-R1-1-A1
NW_018063880.1	genBlastG	transcript	103367	134063	56.83	+	.	ID=XP_007908817.1-R1-1-A1;Name=XP_007908817.1;PID=27.16;Coverage=53.25;Note=PID:27.16-Cover:53.25
NW_018063880.1	genBlastG	coding_exon	103367	103385	.	+	.	ID=XP_007908817.1-R1-1-A1-E1;Parent=XP_007908817.1-R1-1-A1
NW_018063880.1	genBlastG	coding_exon	104063	104449	.	+	.	ID=XP_007908817.1-R1-1-A1-E2;Parent=XP_007908817.1-R1-1-A1
NW_018063880.1	genBlastG	coding_exon	119445	119563	.	+	.	ID=XP_007908817.1-R1-1-A1-E3;Parent=XP_007908817.1-R1-1-A1
NW_018063880.1	genBlastG	coding_exon	126109	126345	.	+	.	ID=XP_007908817.1-R1-1-A1-E4;Parent=XP_007908817.1-R1-1-A1
NW_018063880.1	genBlastG	coding_exon	129926	130013	.	+	.	ID=XP_007908817.1-R1-1-A1-E5;Parent=XP_007908817.1-R1-1-A1
NW_018063880.1	genBlastG	coding_exon	133284	133464	.	+	.	ID=XP_007908817.1-R1-1-A1-E6;Parent=XP_007908817.1-R1-1-A1
NW_018063880.1	genBlastG	coding_exon	134036	134063	.	+	.	ID=XP_007908817.1-R1-1-A1-E7;Parent=XP_007908817.1-R1-1-A1
NW_018036729.1	genBlastG	transcript	90644	93163	57.22	-	.	ID=XP_007908930.1-R1-1-A1;Name=XP_007908930.1;PID=15.54;Coverage=100;Note=PID:15.54-Cover:100
NW_018036729.1	genBlastG	coding_exon	90644	93163	.	-	.	ID=XP_007908930.1-R1-1-A1-E1;Parent=XP_007908930.1-R1-1-A1
NW_018048757.1	genBlastG	transcript	25944	26938	18.04	-	.	ID=XP_007909048.1-R1-1-A1;Name=XP_007909048.1;PID=39.66;Coverage=70.09;Note=PID:39.66-Cover:70.09
NW_018048757.1	genBlastG	coding_exon	26863	26938	.	-	.	ID=XP_007909048.1-R1-1-A1-E1;Parent=XP_007909048.1-R1-1-A1
NW_018048757.1	genBlastG	coding_exon	26097	26383	.	-	.	ID=XP_007909048.1-R1-1-A1-E2;Parent=XP_007909048.1-R1-1-A1
NW_018048757.1	genBlastG	coding_exon	25944	26033	.	-	.	ID=XP_007909048.1-R1-1-A1-E3;Parent=XP_007909048.1-R1-1-A1
NW_018033203.1	genBlastG	transcript	7372	19707	104.2	+	.	ID=XP_007909083.1-R1-1-A1;Name=XP_007909083.1;PID=60.47;Coverage=91.37;Note=PID:60.47-Cover:91.37
NW_018033203.1	genBlastG	coding_exon	7372	7563	.	+	.	ID=XP_007909083.1-R1-1-A1-E1;Parent=XP_007909083.1-R1-1-A1
NW_018033203.1	genBlastG	coding_exon	8536	8705	.	+	.	ID=XP_007909083.1-R1-1-A1-E2;Parent=XP_007909083.1-R1-1-A1
NW_018033203.1	genBlastG	coding_exon	10008	10379	.	+	.	ID=XP_007909083.1-R1-1-A1-E3;Parent=XP_007909083.1-R1-1-A1
NW_018033203.1	genBlastG	coding_exon	15834	15913	.	+	.	ID=XP_007909083.1-R1-1-A1-E4;Parent=XP_007909083.1-R1-1-A1
NW_018033203.1	genBlastG	coding_exon	19439	19707	.	+	.	ID=XP_007909083.1-R1-1-A1-E5;Parent=XP_007909083.1-R1-1-A1
NW_018083194.1	genBlastG	transcript	5809	8613	24.65	-	.	ID=XP_007909087.1-R1-1-A1;Name=XP_007909087.1;PID=19.28;Coverage=28.64;Note=PID:19.28-Cover:28.64
NW_018083194.1	genBlastG	coding_exon	5809	8613	.	-	.	ID=XP_007909087.1-R1-1-A1-E1;Parent=XP_007909087.1-R1-1-A1
NW_018045340.1	genBlastG	transcript	3517	4893	14.5	-	.	ID=XP_007909126.1-R1-1-A1;Name=XP_007909126.1;PID=20.44;Coverage=30.32;Note=PID:20.44-Cover:30.32
NW_018045340.1	genBlastG	coding_exon	4818	4893	.	-	.	ID=XP_007909126.1-R1-1-A1-E1;Parent=XP_007909126.1-R1-1-A1
NW_018045340.1	genBlastG	coding_exon	3953	4044	.	-	.	ID=XP_007909126.1-R1-1-A1-E2;Parent=XP_007909126.1-R1-1-A1
NW_018045340.1	genBlastG	coding_exon	3517	3552	.	-	.	ID=XP_007909126.1-R1-1-A1-E3;Parent=XP_007909126.1-R1-1-A1
NW_018047228.1	genBlastG	transcript	1555	3110	18	+	.	ID=XP_007909135.1-R1-1-A1;Name=XP_007909135.1;PID=27.49;Coverage=64.01;Note=PID:27.49-Cover:64.01
NW_018047228.1	genBlastG	coding_exon	1555	2591	.	+	.	ID=XP_007909135.1-R1-1-A1-E1;Parent=XP_007909135.1-R1-1-A1
NW_018047228.1	genBlastG	coding_exon	3083	3110	.	+	.	ID=XP_007909135.1-R1-1-A1-E2;Parent=XP_007909135.1-R1-1-A1
NW_018069382.1	genBlastG	transcript	20723	32576	35.68	-	.	ID=XP_007909402.1-R1-1-A1;Name=XP_007909402.1;PID=27.58;Coverage=34.27;Note=PID:27.58-Cover:34.27
NW_018069382.1	genBlastG	coding_exon	32409	32576	.	-	.	ID=XP_007909402.1-R1-1-A1-E1;Parent=XP_007909402.1-R1-1-A1
NW_018069382.1	genBlastG	coding_exon	29660	29808	.	-	.	ID=XP_007909402.1-R1-1-A1-E2;Parent=XP_007909402.1-R1-1-A1
NW_018069382.1	genBlastG	coding_exon	27782	27947	.	-	.	ID=XP_007909402.1-R1-1-A1-E3;Parent=XP_007909402.1-R1-1-A1
NW_018069382.1	genBlastG	coding_exon	26833	26928	.	-	.	ID=XP_007909402.1-R1-1-A1-E4;Parent=XP_007909402.1-R1-1-A1
NW_018069382.1	genBlastG	coding_exon	21078	21311	.	-	.	ID=XP_007909402.1-R1-1-A1-E5;Parent=XP_007909402.1-R1-1-A1
NW_018069382.1	genBlastG	coding_exon	20723	20896	.	-	.	ID=XP_007909402.1-R1-1-A1-E6;Parent=XP_007909402.1-R1-1-A1
NW_018075626.1	genBlastG	transcript	132708	155534	115	+	.	ID=XP_007909449.1-R1-1-A1;Name=XP_007909449.1;PID=56.94;Coverage=85.99;Note=PID:56.94-Cover:85.99
NW_018075626.1	genBlastG	coding_exon	132708	132711	.	+	.	ID=XP_007909449.1-R1-1-A1-E1;Parent=XP_007909449.1-R1-1-A1
NW_018075626.1	genBlastG	coding_exon	133737	133886	.	+	.	ID=XP_007909449.1-R1-1-A1-E2;Parent=XP_007909449.1-R1-1-A1
NW_018075626.1	genBlastG	coding_exon	136928	137190	.	+	.	ID=XP_007909449.1-R1-1-A1-E3;Parent=XP_007909449.1-R1-1-A1
NW_018075626.1	genBlastG	coding_exon	141240	141327	.	+	.	ID=XP_007909449.1-R1-1-A1-E4;Parent=XP_007909449.1-R1-1-A1
NW_018075626.1	genBlastG	coding_exon	154118	154186	.	+	.	ID=XP_007909449.1-R1-1-A1-E5;Parent=XP_007909449.1-R1-1-A1
NW_018075626.1	genBlastG	coding_exon	154827	155071	.	+	.	ID=XP_007909449.1-R1-1-A1-E6;Parent=XP_007909449.1-R1-1-A1
NW_018075626.1	genBlastG	coding_exon	155154	155534	.	+	.	ID=XP_007909449.1-R1-1-A1-E7;Parent=XP_007909449.1-R1-1-A1
NW_018047424.1	genBlastG	transcript	2973	4025	83.26	-	.	ID=XP_007909496.1-R1-1-A1;Name=XP_007909496.1;PID=41.42;Coverage=81.78;Note=PID:41.42-Cover:81.78
NW_018047424.1	genBlastG	coding_exon	3980	4025	.	-	.	ID=XP_007909496.1-R1-1-A1-E1;Parent=XP_007909496.1-R1-1-A1
NW_018047424.1	genBlastG	coding_exon	3682	3755	.	-	.	ID=XP_007909496.1-R1-1-A1-E2;Parent=XP_007909496.1-R1-1-A1
NW_018047424.1	genBlastG	coding_exon	3532	3645	.	-	.	ID=XP_007909496.1-R1-1-A1-E3;Parent=XP_007909496.1-R1-1-A1
NW_018047424.1	genBlastG	coding_exon	3302	3495	.	-	.	ID=XP_007909496.1-R1-1-A1-E4;Parent=XP_007909496.1-R1-1-A1
NW_018047424.1	genBlastG	coding_exon	3257	3280	.	-	.	ID=XP_007909496.1-R1-1-A1-E5;Parent=XP_007909496.1-R1-1-A1
NW_018047424.1	genBlastG	coding_exon	3182	3205	.	-	.	ID=XP_007909496.1-R1-1-A1-E6;Parent=XP_007909496.1-R1-1-A1
NW_018047424.1	genBlastG	coding_exon	2973	3024	.	-	.	ID=XP_007909496.1-R1-1-A1-E7;Parent=XP_007909496.1-R1-1-A1
NW_018078439.1	genBlastG	transcript	146	1807	38.19	+	.	ID=XP_007909587.1-R1-1-A1;Name=XP_007909587.1;PID=32.17;Coverage=71.08;Note=PID:32.17-Cover:71.08
NW_018078439.1	genBlastG	coding_exon	146	201	.	+	.	ID=XP_007909587.1-R1-1-A1-E1;Parent=XP_007909587.1-R1-1-A1
NW_018078439.1	genBlastG	coding_exon	1015	1057	.	+	.	ID=XP_007909587.1-R1-1-A1-E2;Parent=XP_007909587.1-R1-1-A1
NW_018078439.1	genBlastG	coding_exon	1175	1344	.	+	.	ID=XP_007909587.1-R1-1-A1-E3;Parent=XP_007909587.1-R1-1-A1
NW_018078439.1	genBlastG	coding_exon	1492	1536	.	+	.	ID=XP_007909587.1-R1-1-A1-E4;Parent=XP_007909587.1-R1-1-A1
NW_018078439.1	genBlastG	coding_exon	1684	1807	.	+	.	ID=XP_007909587.1-R1-1-A1-E5;Parent=XP_007909587.1-R1-1-A1
NW_018040486.1	genBlastG	transcript	2986	18417	102.4	-	.	ID=XP_007909654.1-R1-1-A1;Name=XP_007909654.1;PID=41.67;Coverage=95.16;Note=PID:41.67-Cover:95.16
NW_018040486.1	genBlastG	coding_exon	18333	18417	.	-	.	ID=XP_007909654.1-R1-1-A1-E1;Parent=XP_007909654.1-R1-1-A1
NW_018040486.1	genBlastG	coding_exon	17723	17868	.	-	.	ID=XP_007909654.1-R1-1-A1-E2;Parent=XP_007909654.1-R1-1-A1
NW_018040486.1	genBlastG	coding_exon	16053	16213	.	-	.	ID=XP_007909654.1-R1-1-A1-E3;Parent=XP_007909654.1-R1-1-A1
NW_018040486.1	genBlastG	coding_exon	15989	16028	.	-	.	ID=XP_007909654.1-R1-1-A1-E4;Parent=XP_007909654.1-R1-1-A1
NW_018040486.1	genBlastG	coding_exon	12287	12451	.	-	.	ID=XP_007909654.1-R1-1-A1-E5;Parent=XP_007909654.1-R1-1-A1
NW_018040486.1	genBlastG	coding_exon	2986	4338	.	-	.	ID=XP_007909654.1-R1-1-A1-E6;Parent=XP_007909654.1-R1-1-A1
NW_018060600.1	genBlastG	transcript	204366	205456	15.68	+	.	ID=XP_007909722.1-R1-1-A1;Name=XP_007909722.1;PID=40.8;Coverage=87.61;Note=PID:40.8-Cover:87.61
NW_018060600.1	genBlastG	coding_exon	204366	204406	.	+	.	ID=XP_007909722.1-R1-1-A1-E1;Parent=XP_007909722.1-R1-1-A1
NW_018060600.1	genBlastG	coding_exon	204489	204726	.	+	.	ID=XP_007909722.1-R1-1-A1-E2;Parent=XP_007909722.1-R1-1-A1
NW_018060600.1	genBlastG	coding_exon	205436	205456	.	+	.	ID=XP_007909722.1-R1-1-A1-E3;Parent=XP_007909722.1-R1-1-A1
NW_018046899.1	genBlastG	transcript	19158	21397	48.3	-	.	ID=XP_007909807.1-R1-1-A1;Name=XP_007909807.1;PID=33.21;Coverage=100;Note=PID:33.21-Cover:100
NW_018046899.1	genBlastG	coding_exon	21370	21397	.	-	.	ID=XP_007909807.1-R1-1-A1-E1;Parent=XP_007909807.1-R1-1-A1
NW_018046899.1	genBlastG	coding_exon	20896	21300	.	-	.	ID=XP_007909807.1-R1-1-A1-E2;Parent=XP_007909807.1-R1-1-A1
NW_018046899.1	genBlastG	coding_exon	20612	20850	.	-	.	ID=XP_007909807.1-R1-1-A1-E3;Parent=XP_007909807.1-R1-1-A1
NW_018046899.1	genBlastG	coding_exon	20507	20563	.	-	.	ID=XP_007909807.1-R1-1-A1-E4;Parent=XP_007909807.1-R1-1-A1
NW_018046899.1	genBlastG	coding_exon	20349	20491	.	-	.	ID=XP_007909807.1-R1-1-A1-E5;Parent=XP_007909807.1-R1-1-A1
NW_018046899.1	genBlastG	coding_exon	19158	19626	.	-	.	ID=XP_007909807.1-R1-1-A1-E6;Parent=XP_007909807.1-R1-1-A1
NW_018076109.1	genBlastG	transcript	30375	30940	14	-	.	ID=XP_007909925.1-R1-1-A1;Name=XP_007909925.1;PID=29.25;Coverage=52.17;Note=PID:29.25-Cover:52.17
NW_018076109.1	genBlastG	coding_exon	30894	30940	.	-	.	ID=XP_007909925.1-R1-1-A1-E1;Parent=XP_007909925.1-R1-1-A1
NW_018076109.1	genBlastG	coding_exon	30375	30546	.	-	.	ID=XP_007909925.1-R1-1-A1-E2;Parent=XP_007909925.1-R1-1-A1
NW_018039360.1	genBlastG	transcript	274	1567	19.95	+	.	ID=XP_007910033.1-R1-1-A1;Name=XP_007910033.1;PID=36.88;Coverage=54.72;Note=PID:36.88-Cover:54.72
NW_018039360.1	genBlastG	coding_exon	274	295	.	+	.	ID=XP_007910033.1-R1-1-A1-E1;Parent=XP_007910033.1-R1-1-A1
NW_018039360.1	genBlastG	coding_exon	323	495	.	+	.	ID=XP_007910033.1-R1-1-A1-E2;Parent=XP_007910033.1-R1-1-A1
NW_018039360.1	genBlastG	coding_exon	1499	1567	.	+	.	ID=XP_007910033.1-R1-1-A1-E3;Parent=XP_007910033.1-R1-1-A1
NW_018041989.1	genBlastG	transcript	7930	11768	24.69	+	.	ID=XP_007910255.1-R1-1-A1;Name=XP_007910255.1;PID=43.7;Coverage=74.42;Note=PID:43.7-Cover:74.42
NW_018041989.1	genBlastG	coding_exon	7930	7965	.	+	.	ID=XP_007910255.1-R1-1-A1-E1;Parent=XP_007910255.1-R1-1-A1
NW_018041989.1	genBlastG	coding_exon	8822	8946	.	+	.	ID=XP_007910255.1-R1-1-A1-E2;Parent=XP_007910255.1-R1-1-A1
NW_018041989.1	genBlastG	coding_exon	11639	11768	.	+	.	ID=XP_007910255.1-R1-1-A1-E3;Parent=XP_007910255.1-R1-1-A1
NW_018062242.1	genBlastG	transcript	126075	127830	12.31	+	.	ID=XP_007910257.1-R1-1-A1;Name=XP_007910257.1;PID=28.49;Coverage=44.99;Note=PID:28.49-Cover:44.99
NW_018062242.1	genBlastG	coding_exon	126075	126172	.	+	.	ID=XP_007910257.1-R1-1-A1-E1;Parent=XP_007910257.1-R1-1-A1
NW_018062242.1	genBlastG	coding_exon	126386	126408	.	+	.	ID=XP_007910257.1-R1-1-A1-E2;Parent=XP_007910257.1-R1-1-A1
NW_018062242.1	genBlastG	coding_exon	126430	126554	.	+	.	ID=XP_007910257.1-R1-1-A1-E3;Parent=XP_007910257.1-R1-1-A1
NW_018062242.1	genBlastG	coding_exon	126673	126834	.	+	.	ID=XP_007910257.1-R1-1-A1-E4;Parent=XP_007910257.1-R1-1-A1
NW_018062242.1	genBlastG	coding_exon	127576	127830	.	+	.	ID=XP_007910257.1-R1-1-A1-E5;Parent=XP_007910257.1-R1-1-A1
NW_018080982.1	genBlastG	transcript	45869	48045	78.93	+	.	ID=XP_007910351.1-R1-1-A1;Name=XP_007910351.1;PID=29.69;Coverage=69.19;Note=PID:29.69-Cover:69.19
NW_018080982.1	genBlastG	coding_exon	45869	45941	.	+	.	ID=XP_007910351.1-R1-1-A1-E1;Parent=XP_007910351.1-R1-1-A1
NW_018080982.1	genBlastG	coding_exon	46003	46083	.	+	.	ID=XP_007910351.1-R1-1-A1-E2;Parent=XP_007910351.1-R1-1-A1
NW_018080982.1	genBlastG	coding_exon	46141	46148	.	+	.	ID=XP_007910351.1-R1-1-A1-E3;Parent=XP_007910351.1-R1-1-A1
NW_018080982.1	genBlastG	coding_exon	46936	47514	.	+	.	ID=XP_007910351.1-R1-1-A1-E4;Parent=XP_007910351.1-R1-1-A1
NW_018080982.1	genBlastG	coding_exon	47551	48045	.	+	.	ID=XP_007910351.1-R1-1-A1-E5;Parent=XP_007910351.1-R1-1-A1
NW_018037246.1	genBlastG	transcript	111723	112894	47	-	.	ID=XP_007910474.1-R1-1-A1;Name=XP_007910474.1;PID=50.42;Coverage=82.38;Note=PID:50.42-Cover:82.38
NW_018037246.1	genBlastG	coding_exon	112828	112894	.	-	.	ID=XP_007910474.1-R1-1-A1-E1;Parent=XP_007910474.1-R1-1-A1
NW_018037246.1	genBlastG	coding_exon	111723	112219	.	-	.	ID=XP_007910474.1-R1-1-A1-E2;Parent=XP_007910474.1-R1-1-A1
NW_018029201.1	genBlastG	transcript	120865	121434	2.734	+	.	ID=XP_007910535.1-R1-1-A1;Name=XP_007910535.1;PID=17.03;Coverage=26.75;Note=PID:17.03-Cover:26.75
NW_018029201.1	genBlastG	coding_exon	120865	120983	.	+	.	ID=XP_007910535.1-R1-1-A1-E1;Parent=XP_007910535.1-R1-1-A1
NW_018029201.1	genBlastG	coding_exon	121074	121351	.	+	.	ID=XP_007910535.1-R1-1-A1-E2;Parent=XP_007910535.1-R1-1-A1
NW_018029201.1	genBlastG	coding_exon	121382	121434	.	+	.	ID=XP_007910535.1-R1-1-A1-E3;Parent=XP_007910535.1-R1-1-A1
NW_018036631.1	genBlastG	transcript	118207	120051	9.779	-	.	ID=XP_007910541.1-R1-1-A1;Name=XP_007910541.1;PID=34.62;Coverage=100;Note=PID:34.62-Cover:100
NW_018036631.1	genBlastG	coding_exon	119842	120051	.	-	.	ID=XP_007910541.1-R1-1-A1-E1;Parent=XP_007910541.1-R1-1-A1
NW_018036631.1	genBlastG	coding_exon	119622	119629	.	-	.	ID=XP_007910541.1-R1-1-A1-E2;Parent=XP_007910541.1-R1-1-A1
NW_018036631.1	genBlastG	coding_exon	119416	119579	.	-	.	ID=XP_007910541.1-R1-1-A1-E3;Parent=XP_007910541.1-R1-1-A1
NW_018036631.1	genBlastG	coding_exon	118207	118274	.	-	.	ID=XP_007910541.1-R1-1-A1-E4;Parent=XP_007910541.1-R1-1-A1
NW_018046205.1	genBlastG	transcript	8627	38299	-94.79	+	.	ID=XP_007910555.1-R1-1-A1;Name=XP_007910555.1;PID=18.56;Coverage=27.5;Note=PID:18.56-Cover:27.5
NW_018046205.1	genBlastG	coding_exon	8627	8806	.	+	.	ID=XP_007910555.1-R1-1-A1-E1;Parent=XP_007910555.1-R1-1-A1
NW_018046205.1	genBlastG	coding_exon	8903	9068	.	+	.	ID=XP_007910555.1-R1-1-A1-E2;Parent=XP_007910555.1-R1-1-A1
NW_018046205.1	genBlastG	coding_exon	12199	12304	.	+	.	ID=XP_007910555.1-R1-1-A1-E3;Parent=XP_007910555.1-R1-1-A1
NW_018046205.1	genBlastG	coding_exon	19662	19872	.	+	.	ID=XP_007910555.1-R1-1-A1-E4;Parent=XP_007910555.1-R1-1-A1
NW_018046205.1	genBlastG	coding_exon	32614	32670	.	+	.	ID=XP_007910555.1-R1-1-A1-E5;Parent=XP_007910555.1-R1-1-A1
NW_018046205.1	genBlastG	coding_exon	37433	37608	.	+	.	ID=XP_007910555.1-R1-1-A1-E6;Parent=XP_007910555.1-R1-1-A1
NW_018046205.1	genBlastG	coding_exon	38236	38299	.	+	.	ID=XP_007910555.1-R1-1-A1-E7;Parent=XP_007910555.1-R1-1-A1
NW_018031101.1	genBlastG	transcript	393976	395805	46.36	-	.	ID=XP_007910561.1-R1-1-A1;Name=XP_007910561.1;PID=25.48;Coverage=54.55;Note=PID:25.48-Cover:54.55
NW_018031101.1	genBlastG	coding_exon	395758	395805	.	-	.	ID=XP_007910561.1-R1-1-A1-E1;Parent=XP_007910561.1-R1-1-A1
NW_018031101.1	genBlastG	coding_exon	395583	395739	.	-	.	ID=XP_007910561.1-R1-1-A1-E2;Parent=XP_007910561.1-R1-1-A1
NW_018031101.1	genBlastG	coding_exon	395293	395542	.	-	.	ID=XP_007910561.1-R1-1-A1-E3;Parent=XP_007910561.1-R1-1-A1
NW_018031101.1	genBlastG	coding_exon	395179	395268	.	-	.	ID=XP_007910561.1-R1-1-A1-E4;Parent=XP_007910561.1-R1-1-A1
NW_018031101.1	genBlastG	coding_exon	394850	395103	.	-	.	ID=XP_007910561.1-R1-1-A1-E5;Parent=XP_007910561.1-R1-1-A1
NW_018031101.1	genBlastG	coding_exon	394767	394789	.	-	.	ID=XP_007910561.1-R1-1-A1-E6;Parent=XP_007910561.1-R1-1-A1
NW_018031101.1	genBlastG	coding_exon	393976	394020	.	-	.	ID=XP_007910561.1-R1-1-A1-E7;Parent=XP_007910561.1-R1-1-A1
NW_018038705.1	genBlastG	transcript	112028	112481	11	+	.	ID=XP_007910608.1-R1-1-A1;Name=XP_007910608.1;PID=50.82;Coverage=80;Note=PID:50.82-Cover:80
NW_018038705.1	genBlastG	coding_exon	112028	112118	.	+	.	ID=XP_007910608.1-R1-1-A1-E1;Parent=XP_007910608.1-R1-1-A1
NW_018038705.1	genBlastG	coding_exon	112414	112434	.	+	.	ID=XP_007910608.1-R1-1-A1-E2;Parent=XP_007910608.1-R1-1-A1
NW_018038705.1	genBlastG	coding_exon	112447	112481	.	+	.	ID=XP_007910608.1-R1-1-A1-E3;Parent=XP_007910608.1-R1-1-A1
NW_018044505.1	genBlastG	transcript	38293	38741	17	+	.	ID=XP_007910729.1-R1-1-A1;Name=XP_007910729.1;PID=40.8;Coverage=68.91;Note=PID:40.8-Cover:68.91
NW_018044505.1	genBlastG	coding_exon	38293	38519	.	+	.	ID=XP_007910729.1-R1-1-A1-E1;Parent=XP_007910729.1-R1-1-A1
NW_018044505.1	genBlastG	coding_exon	38720	38741	.	+	.	ID=XP_007910729.1-R1-1-A1-E2;Parent=XP_007910729.1-R1-1-A1
NW_018027721.1	genBlastG	transcript	30442	31439	16.06	+	.	ID=ENSP00000374916.3-R1-1-A1;Name=ENSP00000374916.3;PID=27.04;Coverage=100;Note=PID:27.04-Cover:100
NW_018027721.1	genBlastG	coding_exon	30442	30472	.	+	.	ID=ENSP00000374916.3-R1-1-A1-E1;Parent=ENSP00000374916.3-R1-1-A1
NW_018027721.1	genBlastG	coding_exon	30946	31118	.	+	.	ID=ENSP00000374916.3-R1-1-A1-E2;Parent=ENSP00000374916.3-R1-1-A1
NW_018027721.1	genBlastG	coding_exon	31140	31439	.	+	.	ID=ENSP00000374916.3-R1-1-A1-E3;Parent=ENSP00000374916.3-R1-1-A1
NW_018051752.1	genBlastG	transcript	2483	2986	16.75	-	.	ID=ENSP00000487807.1-R1-2-A1;Name=ENSP00000487807.1;PID=30.43;Coverage=100;Note=PID:30.43-Cover:100
NW_018051752.1	genBlastG	coding_exon	2971	2986	.	-	.	ID=ENSP00000487807.1-R1-2-A1-E1;Parent=ENSP00000487807.1-R1-2-A1
NW_018051752.1	genBlastG	coding_exon	2483	2934	.	-	.	ID=ENSP00000487807.1-R1-2-A1-E2;Parent=ENSP00000487807.1-R1-2-A1
NW_018056652.1	genBlastG	transcript	113364	114141	16.67	+	.	ID=ENSP00000487742.1-R1-1-A1;Name=ENSP00000487742.1;PID=29.41;Coverage=63.28;Note=PID:29.41-Cover:63.28
NW_018056652.1	genBlastG	coding_exon	113364	113390	.	+	.	ID=ENSP00000487742.1-R1-1-A1-E1;Parent=ENSP00000487742.1-R1-1-A1
NW_018056652.1	genBlastG	coding_exon	113830	114141	.	+	.	ID=ENSP00000487742.1-R1-1-A1-E2;Parent=ENSP00000487742.1-R1-1-A1
NW_018076523.1	genBlastG	transcript	80	346	2.208	-	.	ID=ENSP00000482954.1-R1-1-A1;Name=ENSP00000482954.1;PID=11.88;Coverage=14.15;Note=PID:11.88-Cover:14.15
NW_018076523.1	genBlastG	coding_exon	80	346	.	-	.	ID=ENSP00000482954.1-R1-1-A1-E1;Parent=ENSP00000482954.1-R1-1-A1
NW_018047186.1	genBlastG	transcript	21062	22093	16.74	+	.	ID=ENSP00000354553.1-R1-1-A1;Name=ENSP00000354553.1;PID=20.57;Coverage=37.19;Note=PID:20.57-Cover:37.19
NW_018047186.1	genBlastG	coding_exon	21062	21134	.	+	.	ID=ENSP00000354553.1-R1-1-A1-E1;Parent=ENSP00000354553.1-R1-1-A1
NW_018047186.1	genBlastG	coding_exon	21656	21983	.	+	.	ID=ENSP00000354553.1-R1-1-A1-E2;Parent=ENSP00000354553.1-R1-1-A1
NW_018047186.1	genBlastG	coding_exon	22039	22093	.	+	.	ID=ENSP00000354553.1-R1-1-A1-E3;Parent=ENSP00000354553.1-R1-1-A1
NW_018042409.1	genBlastG	transcript	45541	45777	11	-	.	ID=ENSP00000454370.1-R1-1-A1;Name=ENSP00000454370.1;PID=58.97;Coverage=100;Note=PID:58.97-Cover:100
NW_018042409.1	genBlastG	coding_exon	45745	45777	.	-	.	ID=ENSP00000454370.1-R1-1-A1-E1;Parent=ENSP00000454370.1-R1-1-A1
NW_018042409.1	genBlastG	coding_exon	45541	45732	.	-	.	ID=ENSP00000454370.1-R1-1-A1-E2;Parent=ENSP00000454370.1-R1-1-A1
NW_018075334.1	genBlastG	transcript	52164	57253	137.2	-	.	ID=ENSP00000357791.2-R1-1-A1;Name=ENSP00000357791.2;PID=21.64;Coverage=40.14;Note=PID:21.64-Cover:40.14
NW_018075334.1	genBlastG	coding_exon	57199	57253	.	-	.	ID=ENSP00000357791.2-R1-1-A1-E1;Parent=ENSP00000357791.2-R1-1-A1
NW_018075334.1	genBlastG	coding_exon	56302	56580	.	-	.	ID=ENSP00000357791.2-R1-1-A1-E2;Parent=ENSP00000357791.2-R1-1-A1
NW_018075334.1	genBlastG	coding_exon	56122	56157	.	-	.	ID=ENSP00000357791.2-R1-1-A1-E3;Parent=ENSP00000357791.2-R1-1-A1
NW_018075334.1	genBlastG	coding_exon	55666	56082	.	-	.	ID=ENSP00000357791.2-R1-1-A1-E4;Parent=ENSP00000357791.2-R1-1-A1
NW_018075334.1	genBlastG	coding_exon	55625	55644	.	-	.	ID=ENSP00000357791.2-R1-1-A1-E5;Parent=ENSP00000357791.2-R1-1-A1
NW_018075334.1	genBlastG	coding_exon	55472	55537	.	-	.	ID=ENSP00000357791.2-R1-1-A1-E6;Parent=ENSP00000357791.2-R1-1-A1
NW_018075334.1	genBlastG	coding_exon	55356	55450	.	-	.	ID=ENSP00000357791.2-R1-1-A1-E7;Parent=ENSP00000357791.2-R1-1-A1
NW_018075334.1	genBlastG	coding_exon	55121	55334	.	-	.	ID=ENSP00000357791.2-R1-1-A1-E8;Parent=ENSP00000357791.2-R1-1-A1
NW_018075334.1	genBlastG	coding_exon	54460	55101	.	-	.	ID=ENSP00000357791.2-R1-1-A1-E9;Parent=ENSP00000357791.2-R1-1-A1
NW_018075334.1	genBlastG	coding_exon	54191	54440	.	-	.	ID=ENSP00000357791.2-R1-1-A1-E10;Parent=ENSP00000357791.2-R1-1-A1
NW_018075334.1	genBlastG	coding_exon	54150	54169	.	-	.	ID=ENSP00000357791.2-R1-1-A1-E11;Parent=ENSP00000357791.2-R1-1-A1
NW_018075334.1	genBlastG	coding_exon	54065	54092	.	-	.	ID=ENSP00000357791.2-R1-1-A1-E12;Parent=ENSP00000357791.2-R1-1-A1
NW_018075334.1	genBlastG	coding_exon	53999	54025	.	-	.	ID=ENSP00000357791.2-R1-1-A1-E13;Parent=ENSP00000357791.2-R1-1-A1
NW_018075334.1	genBlastG	coding_exon	53951	53977	.	-	.	ID=ENSP00000357791.2-R1-1-A1-E14;Parent=ENSP00000357791.2-R1-1-A1
NW_018075334.1	genBlastG	coding_exon	53612	53911	.	-	.	ID=ENSP00000357791.2-R1-1-A1-E15;Parent=ENSP00000357791.2-R1-1-A1
NW_018075334.1	genBlastG	coding_exon	53571	53590	.	-	.	ID=ENSP00000357791.2-R1-1-A1-E16;Parent=ENSP00000357791.2-R1-1-A1
NW_018075334.1	genBlastG	coding_exon	53493	53522	.	-	.	ID=ENSP00000357791.2-R1-1-A1-E17;Parent=ENSP00000357791.2-R1-1-A1
NW_018075334.1	genBlastG	coding_exon	53369	53473	.	-	.	ID=ENSP00000357791.2-R1-1-A1-E18;Parent=ENSP00000357791.2-R1-1-A1
NW_018075334.1	genBlastG	coding_exon	53330	53357	.	-	.	ID=ENSP00000357791.2-R1-1-A1-E19;Parent=ENSP00000357791.2-R1-1-A1
NW_018075334.1	genBlastG	coding_exon	53068	53251	.	-	.	ID=ENSP00000357791.2-R1-1-A1-E20;Parent=ENSP00000357791.2-R1-1-A1
NW_018075334.1	genBlastG	coding_exon	52872	53046	.	-	.	ID=ENSP00000357791.2-R1-1-A1-E21;Parent=ENSP00000357791.2-R1-1-A1
NW_018075334.1	genBlastG	coding_exon	52592	52619	.	-	.	ID=ENSP00000357791.2-R1-1-A1-E22;Parent=ENSP00000357791.2-R1-1-A1
NW_018075334.1	genBlastG	coding_exon	52164	52552	.	-	.	ID=ENSP00000357791.2-R1-1-A1-E23;Parent=ENSP00000357791.2-R1-1-A1
NW_018068245.1	genBlastG	transcript	1862	3118	19.07	+	.	ID=ENSP00000398632.2-R1-1-A1;Name=ENSP00000398632.2;PID=24.88;Coverage=56.47;Note=PID:24.88-Cover:56.47
NW_018068245.1	genBlastG	coding_exon	1862	3118	.	+	.	ID=ENSP00000398632.2-R1-1-A1-E1;Parent=ENSP00000398632.2-R1-1-A1
NW_018051654.1	genBlastG	transcript	17317	20340	49.6	+	.	ID=ENSP00000416558.2-R1-1-A1;Name=ENSP00000416558.2;PID=30.59;Coverage=50.16;Note=PID:30.59-Cover:50.16
NW_018051654.1	genBlastG	coding_exon	17317	17319	.	+	.	ID=ENSP00000416558.2-R1-1-A1-E1;Parent=ENSP00000416558.2-R1-1-A1
NW_018051654.1	genBlastG	coding_exon	17332	17397	.	+	.	ID=ENSP00000416558.2-R1-1-A1-E2;Parent=ENSP00000416558.2-R1-1-A1
NW_018051654.1	genBlastG	coding_exon	17452	17491	.	+	.	ID=ENSP00000416558.2-R1-1-A1-E3;Parent=ENSP00000416558.2-R1-1-A1
NW_018051654.1	genBlastG	coding_exon	17525	17598	.	+	.	ID=ENSP00000416558.2-R1-1-A1-E4;Parent=ENSP00000416558.2-R1-1-A1
NW_018051654.1	genBlastG	coding_exon	17762	17912	.	+	.	ID=ENSP00000416558.2-R1-1-A1-E5;Parent=ENSP00000416558.2-R1-1-A1
NW_018051654.1	genBlastG	coding_exon	19731	20006	.	+	.	ID=ENSP00000416558.2-R1-1-A1-E6;Parent=ENSP00000416558.2-R1-1-A1
NW_018051654.1	genBlastG	coding_exon	20018	20340	.	+	.	ID=ENSP00000416558.2-R1-1-A1-E7;Parent=ENSP00000416558.2-R1-1-A1
NW_018074062.1	genBlastG	transcript	26506	27909	16.83	+	.	ID=ENSP00000413861.2-R1-1-A1;Name=ENSP00000413861.2;PID=19.39;Coverage=34.66;Note=PID:19.39-Cover:34.66
NW_018074062.1	genBlastG	coding_exon	26506	26545	.	+	.	ID=ENSP00000413861.2-R1-1-A1-E1;Parent=ENSP00000413861.2-R1-1-A1
NW_018074062.1	genBlastG	coding_exon	26945	27310	.	+	.	ID=ENSP00000413861.2-R1-1-A1-E2;Parent=ENSP00000413861.2-R1-1-A1
NW_018074062.1	genBlastG	coding_exon	27815	27909	.	+	.	ID=ENSP00000413861.2-R1-1-A1-E3;Parent=ENSP00000413861.2-R1-1-A1
NW_018043442.1	genBlastG	transcript	19789	22333	24.08	-	.	ID=ENSP00000381970.2-R1-1-A1;Name=ENSP00000381970.2;PID=28.62;Coverage=75.67;Note=PID:28.62-Cover:75.67
NW_018043442.1	genBlastG	coding_exon	22252	22333	.	-	.	ID=ENSP00000381970.2-R1-1-A1-E1;Parent=ENSP00000381970.2-R1-1-A1
NW_018043442.1	genBlastG	coding_exon	21498	22180	.	-	.	ID=ENSP00000381970.2-R1-1-A1-E2;Parent=ENSP00000381970.2-R1-1-A1
NW_018043442.1	genBlastG	coding_exon	21287	21401	.	-	.	ID=ENSP00000381970.2-R1-1-A1-E3;Parent=ENSP00000381970.2-R1-1-A1
NW_018043442.1	genBlastG	coding_exon	20061	20180	.	-	.	ID=ENSP00000381970.2-R1-1-A1-E4;Parent=ENSP00000381970.2-R1-1-A1
NW_018043442.1	genBlastG	coding_exon	19975	19997	.	-	.	ID=ENSP00000381970.2-R1-1-A1-E5;Parent=ENSP00000381970.2-R1-1-A1
NW_018043442.1	genBlastG	coding_exon	19789	19953	.	-	.	ID=ENSP00000381970.2-R1-1-A1-E6;Parent=ENSP00000381970.2-R1-1-A1
NW_018034072.1	genBlastG	transcript	43433	44380	22	-	.	ID=ENSP00000485216.1-R1-1-A1;Name=ENSP00000485216.1;PID=40.26;Coverage=71.74;Note=PID:40.26-Cover:71.74
NW_018034072.1	genBlastG	coding_exon	44292	44380	.	-	.	ID=ENSP00000485216.1-R1-1-A1-E1;Parent=ENSP00000485216.1-R1-1-A1
NW_018034072.1	genBlastG	coding_exon	43433	43643	.	-	.	ID=ENSP00000485216.1-R1-1-A1-E2;Parent=ENSP00000485216.1-R1-1-A1
NW_018066153.1	genBlastG	transcript	260	9622	28.97	+	.	ID=ENSP00000445626.1-R1-1-A1;Name=ENSP00000445626.1;PID=18.21;Coverage=30.73;Note=PID:18.21-Cover:30.73
NW_018066153.1	genBlastG	coding_exon	260	284	.	+	.	ID=ENSP00000445626.1-R1-1-A1-E1;Parent=ENSP00000445626.1-R1-1-A1
NW_018066153.1	genBlastG	coding_exon	549	671	.	+	.	ID=ENSP00000445626.1-R1-1-A1-E2;Parent=ENSP00000445626.1-R1-1-A1
NW_018066153.1	genBlastG	coding_exon	801	883	.	+	.	ID=ENSP00000445626.1-R1-1-A1-E3;Parent=ENSP00000445626.1-R1-1-A1
NW_018066153.1	genBlastG	coding_exon	899	1036	.	+	.	ID=ENSP00000445626.1-R1-1-A1-E4;Parent=ENSP00000445626.1-R1-1-A1
NW_018066153.1	genBlastG	coding_exon	8550	8678	.	+	.	ID=ENSP00000445626.1-R1-1-A1-E5;Parent=ENSP00000445626.1-R1-1-A1
NW_018066153.1	genBlastG	coding_exon	9575	9622	.	+	.	ID=ENSP00000445626.1-R1-1-A1-E6;Parent=ENSP00000445626.1-R1-1-A1
NW_018057578.1	genBlastG	transcript	113783	115765	22.14	-	.	ID=ENSP00000357764.2-R1-1-A1;Name=ENSP00000357764.2;PID=33.33;Coverage=82.4;Note=PID:33.33-Cover:82.4
NW_018057578.1	genBlastG	coding_exon	115707	115765	.	-	.	ID=ENSP00000357764.2-R1-1-A1-E1;Parent=ENSP00000357764.2-R1-1-A1
NW_018057578.1	genBlastG	coding_exon	114523	114725	.	-	.	ID=ENSP00000357764.2-R1-1-A1-E2;Parent=ENSP00000357764.2-R1-1-A1
NW_018057578.1	genBlastG	coding_exon	114424	114507	.	-	.	ID=ENSP00000357764.2-R1-1-A1-E3;Parent=ENSP00000357764.2-R1-1-A1
NW_018057578.1	genBlastG	coding_exon	114320	114408	.	-	.	ID=ENSP00000357764.2-R1-1-A1-E4;Parent=ENSP00000357764.2-R1-1-A1
NW_018057578.1	genBlastG	coding_exon	113962	114007	.	-	.	ID=ENSP00000357764.2-R1-1-A1-E5;Parent=ENSP00000357764.2-R1-1-A1
NW_018057578.1	genBlastG	coding_exon	113926	113946	.	-	.	ID=ENSP00000357764.2-R1-1-A1-E6;Parent=ENSP00000357764.2-R1-1-A1
NW_018057578.1	genBlastG	coding_exon	113893	113913	.	-	.	ID=ENSP00000357764.2-R1-1-A1-E7;Parent=ENSP00000357764.2-R1-1-A1
NW_018057578.1	genBlastG	coding_exon	113783	113880	.	-	.	ID=ENSP00000357764.2-R1-1-A1-E8;Parent=ENSP00000357764.2-R1-1-A1
NW_018036314.1	genBlastG	transcript	45705	46433	60.95	-	.	ID=ENSP00000438832.1-R1-1-A1;Name=ENSP00000438832.1;PID=25.78;Coverage=47.64;Note=PID:25.78-Cover:47.64
NW_018036314.1	genBlastG	coding_exon	45705	46433	.	-	.	ID=ENSP00000438832.1-R1-1-A1-E1;Parent=ENSP00000438832.1-R1-1-A1
NW_018046603.1	genBlastG	transcript	3240	4127	17.8	-	.	ID=ENSP00000456337.1-R1-2-A1;Name=ENSP00000456337.1;PID=39.57;Coverage=94.21;Note=PID:39.57-Cover:94.21
NW_018046603.1	genBlastG	coding_exon	4074	4127	.	-	.	ID=ENSP00000456337.1-R1-2-A1-E1;Parent=ENSP00000456337.1-R1-2-A1
NW_018046603.1	genBlastG	coding_exon	3240	3530	.	-	.	ID=ENSP00000456337.1-R1-2-A1-E2;Parent=ENSP00000456337.1-R1-2-A1
NW_018040594.1	genBlastG	transcript	35389	39693	79.72	+	.	ID=ENSP00000430633.1-R1-1-A1;Name=ENSP00000430633.1;PID=31.36;Coverage=83.94;Note=PID:31.36-Cover:83.94
NW_018040594.1	genBlastG	coding_exon	35389	35916	.	+	.	ID=ENSP00000430633.1-R1-1-A1-E1;Parent=ENSP00000430633.1-R1-1-A1
NW_018040594.1	genBlastG	coding_exon	36351	36426	.	+	.	ID=ENSP00000430633.1-R1-1-A1-E2;Parent=ENSP00000430633.1-R1-1-A1
NW_018040594.1	genBlastG	coding_exon	36445	36874	.	+	.	ID=ENSP00000430633.1-R1-1-A1-E3;Parent=ENSP00000430633.1-R1-1-A1
NW_018040594.1	genBlastG	coding_exon	36923	36973	.	+	.	ID=ENSP00000430633.1-R1-1-A1-E4;Parent=ENSP00000430633.1-R1-1-A1
NW_018040594.1	genBlastG	coding_exon	37013	37072	.	+	.	ID=ENSP00000430633.1-R1-1-A1-E5;Parent=ENSP00000430633.1-R1-1-A1
NW_018040594.1	genBlastG	coding_exon	37088	37499	.	+	.	ID=ENSP00000430633.1-R1-1-A1-E6;Parent=ENSP00000430633.1-R1-1-A1
NW_018040594.1	genBlastG	coding_exon	37539	37916	.	+	.	ID=ENSP00000430633.1-R1-1-A1-E7;Parent=ENSP00000430633.1-R1-1-A1
NW_018040594.1	genBlastG	coding_exon	37935	38060	.	+	.	ID=ENSP00000430633.1-R1-1-A1-E8;Parent=ENSP00000430633.1-R1-1-A1
NW_018040594.1	genBlastG	coding_exon	38884	39209	.	+	.	ID=ENSP00000430633.1-R1-1-A1-E9;Parent=ENSP00000430633.1-R1-1-A1
NW_018040594.1	genBlastG	coding_exon	39225	39693	.	+	.	ID=ENSP00000430633.1-R1-1-A1-E10;Parent=ENSP00000430633.1-R1-1-A1
NW_018038108.1	genBlastG	transcript	183506	184978	44.24	+	.	ID=ENSP00000490292.1-R1-1-A1;Name=ENSP00000490292.1;PID=14.34;Coverage=26.67;Note=PID:14.34-Cover:26.67
NW_018038108.1	genBlastG	coding_exon	183506	183640	.	+	.	ID=ENSP00000490292.1-R1-1-A1-E1;Parent=ENSP00000490292.1-R1-1-A1
NW_018038108.1	genBlastG	coding_exon	184064	184081	.	+	.	ID=ENSP00000490292.1-R1-1-A1-E2;Parent=ENSP00000490292.1-R1-1-A1
NW_018038108.1	genBlastG	coding_exon	184145	184180	.	+	.	ID=ENSP00000490292.1-R1-1-A1-E3;Parent=ENSP00000490292.1-R1-1-A1
NW_018038108.1	genBlastG	coding_exon	184523	184540	.	+	.	ID=ENSP00000490292.1-R1-1-A1-E4;Parent=ENSP00000490292.1-R1-1-A1
NW_018038108.1	genBlastG	coding_exon	184955	184978	.	+	.	ID=ENSP00000490292.1-R1-1-A1-E5;Parent=ENSP00000490292.1-R1-1-A1
NW_018031678.1	genBlastG	transcript	257047	261393	60.59	+	.	ID=ENSP00000317895.3-R1-1-A1;Name=ENSP00000317895.3;PID=33.03;Coverage=70.54;Note=PID:33.03-Cover:70.54
NW_018031678.1	genBlastG	coding_exon	257047	257141	.	+	.	ID=ENSP00000317895.3-R1-1-A1-E1;Parent=ENSP00000317895.3-R1-1-A1
NW_018031678.1	genBlastG	coding_exon	257840	258478	.	+	.	ID=ENSP00000317895.3-R1-1-A1-E2;Parent=ENSP00000317895.3-R1-1-A1
NW_018031678.1	genBlastG	coding_exon	258524	258612	.	+	.	ID=ENSP00000317895.3-R1-1-A1-E3;Parent=ENSP00000317895.3-R1-1-A1
NW_018031678.1	genBlastG	coding_exon	258871	259108	.	+	.	ID=ENSP00000317895.3-R1-1-A1-E4;Parent=ENSP00000317895.3-R1-1-A1
NW_018031678.1	genBlastG	coding_exon	260650	260843	.	+	.	ID=ENSP00000317895.3-R1-1-A1-E5;Parent=ENSP00000317895.3-R1-1-A1
NW_018031678.1	genBlastG	coding_exon	260987	261393	.	+	.	ID=ENSP00000317895.3-R1-1-A1-E6;Parent=ENSP00000317895.3-R1-1-A1
NW_018055687.1	genBlastG	transcript	5	902	2.722	+	.	ID=ENSP00000459719.1-R1-1-A1;Name=ENSP00000459719.1;PID=5.768;Coverage=6.205;Note=PID:5.768-Cover:6.205
NW_018055687.1	genBlastG	coding_exon	5	192	.	+	.	ID=ENSP00000459719.1-R1-1-A1-E1;Parent=ENSP00000459719.1-R1-1-A1
NW_018055687.1	genBlastG	coding_exon	232	318	.	+	.	ID=ENSP00000459719.1-R1-1-A1-E2;Parent=ENSP00000459719.1-R1-1-A1
NW_018055687.1	genBlastG	coding_exon	707	902	.	+	.	ID=ENSP00000459719.1-R1-1-A1-E3;Parent=ENSP00000459719.1-R1-1-A1
NW_018079766.1	genBlastG	transcript	5214	6587	57.26	-	.	ID=ENSP00000370420.1-R1-1-A1;Name=ENSP00000370420.1;PID=30.75;Coverage=100;Note=PID:30.75-Cover:100
NW_018079766.1	genBlastG	coding_exon	6570	6587	.	-	.	ID=ENSP00000370420.1-R1-1-A1-E1;Parent=ENSP00000370420.1-R1-1-A1
NW_018079766.1	genBlastG	coding_exon	6422	6497	.	-	.	ID=ENSP00000370420.1-R1-1-A1-E2;Parent=ENSP00000370420.1-R1-1-A1
NW_018079766.1	genBlastG	coding_exon	6062	6172	.	-	.	ID=ENSP00000370420.1-R1-1-A1-E3;Parent=ENSP00000370420.1-R1-1-A1
NW_018079766.1	genBlastG	coding_exon	5214	5914	.	-	.	ID=ENSP00000370420.1-R1-1-A1-E4;Parent=ENSP00000370420.1-R1-1-A1
NW_018061807.1	genBlastG	transcript	311	1249	27.5	+	.	ID=ENSP00000410858.2-R1-3-A1;Name=ENSP00000410858.2;PID=24.21;Coverage=100;Note=PID:24.21-Cover:100
NW_018061807.1	genBlastG	coding_exon	311	1249	.	+	.	ID=ENSP00000410858.2-R1-3-A1-E1;Parent=ENSP00000410858.2-R1-3-A1
NW_018035571.1	genBlastG	transcript	128757	130460	17.5	+	.	ID=ENSP00000490456.1-R1-1-A1;Name=ENSP00000490456.1;PID=32.03;Coverage=100;Note=PID:32.03-Cover:100
NW_018035571.1	genBlastG	coding_exon	128757	128882	.	+	.	ID=ENSP00000490456.1-R1-1-A1-E1;Parent=ENSP00000490456.1-R1-1-A1
NW_018035571.1	genBlastG	coding_exon	129650	130043	.	+	.	ID=ENSP00000490456.1-R1-1-A1-E2;Parent=ENSP00000490456.1-R1-1-A1
NW_018035571.1	genBlastG	coding_exon	130375	130460	.	+	.	ID=ENSP00000490456.1-R1-1-A1-E3;Parent=ENSP00000490456.1-R1-1-A1
NW_018036546.1	genBlastG	transcript	25314	27572	20.97	-	.	ID=ENSP00000370447.3-R1-1-A1;Name=ENSP00000370447.3;PID=28.76;Coverage=71.36;Note=PID:28.76-Cover:71.36
NW_018036546.1	genBlastG	coding_exon	27206	27572	.	-	.	ID=ENSP00000370447.3-R1-1-A1-E1;Parent=ENSP00000370447.3-R1-1-A1
NW_018036546.1	genBlastG	coding_exon	25314	25390	.	-	.	ID=ENSP00000370447.3-R1-1-A1-E2;Parent=ENSP00000370447.3-R1-1-A1
NW_018052284.1	genBlastG	transcript	2819	3360	20.5	+	.	ID=ENSP00000262710.1-R1-1-A1;Name=ENSP00000262710.1;PID=9.68;Coverage=11.41;Note=PID:9.68-Cover:11.41
NW_018052284.1	genBlastG	coding_exon	2819	3064	.	+	.	ID=ENSP00000262710.1-R1-1-A1-E1;Parent=ENSP00000262710.1-R1-1-A1
NW_018052284.1	genBlastG	coding_exon	3145	3360	.	+	.	ID=ENSP00000262710.1-R1-1-A1-E2;Parent=ENSP00000262710.1-R1-1-A1
NW_018033016.1	genBlastG	transcript	71114	71434	34.63	+	.	ID=ENSP00000360988.3-R1-1-A1;Name=ENSP00000360988.3;PID=6.07;Coverage=6.07;Note=PID:6.07-Cover:6.07
NW_018033016.1	genBlastG	coding_exon	71114	71130	.	+	.	ID=ENSP00000360988.3-R1-1-A1-E1;Parent=ENSP00000360988.3-R1-1-A1
NW_018033016.1	genBlastG	coding_exon	71308	71314	.	+	.	ID=ENSP00000360988.3-R1-1-A1-E2;Parent=ENSP00000360988.3-R1-1-A1
NW_018033016.1	genBlastG	coding_exon	71399	71434	.	+	.	ID=ENSP00000360988.3-R1-1-A1-E3;Parent=ENSP00000360988.3-R1-1-A1
NW_018065994.1	genBlastG	transcript	3021	3488	20.3	+	.	ID=ENSP00000358667.4-R1-1-A1;Name=ENSP00000358667.4;PID=31.4;Coverage=86.11;Note=PID:31.4-Cover:86.11
NW_018065994.1	genBlastG	coding_exon	3021	3488	.	+	.	ID=ENSP00000358667.4-R1-1-A1-E1;Parent=ENSP00000358667.4-R1-1-A1
NW_018031827.1	genBlastG	transcript	133490	135024	38.1	+	.	ID=ENSP00000361669.4-R1-1-A1;Name=ENSP00000361669.4;PID=33.33;Coverage=76.11;Note=PID:33.33-Cover:76.11
NW_018031827.1	genBlastG	coding_exon	133490	133653	.	+	.	ID=ENSP00000361669.4-R1-1-A1-E1;Parent=ENSP00000361669.4-R1-1-A1
NW_018031827.1	genBlastG	coding_exon	134061	134262	.	+	.	ID=ENSP00000361669.4-R1-1-A1-E2;Parent=ENSP00000361669.4-R1-1-A1
NW_018031827.1	genBlastG	coding_exon	134320	134794	.	+	.	ID=ENSP00000361669.4-R1-1-A1-E3;Parent=ENSP00000361669.4-R1-1-A1
NW_018031827.1	genBlastG	coding_exon	134939	135024	.	+	.	ID=ENSP00000361669.4-R1-1-A1-E4;Parent=ENSP00000361669.4-R1-1-A1
NW_018058354.1	genBlastG	transcript	129953	130312	12.5	+	.	ID=ENSP00000299191.3-R1-1-A1;Name=ENSP00000299191.3;PID=22.55;Coverage=42.64;Note=PID:22.55-Cover:42.64
NW_018058354.1	genBlastG	coding_exon	129953	130000	.	+	.	ID=ENSP00000299191.3-R1-1-A1-E1;Parent=ENSP00000299191.3-R1-1-A1
NW_018058354.1	genBlastG	coding_exon	130019	130312	.	+	.	ID=ENSP00000299191.3-R1-1-A1-E2;Parent=ENSP00000299191.3-R1-1-A1
NW_018056700.1	genBlastG	transcript	3438	4754	-6.163	-	.	ID=ENSP00000266022.4-R1-1-A1;Name=ENSP00000266022.4;PID=16.61;Coverage=23.24;Note=PID:16.61-Cover:23.24
NW_018056700.1	genBlastG	coding_exon	4236	4754	.	-	.	ID=ENSP00000266022.4-R1-1-A1-E1;Parent=ENSP00000266022.4-R1-1-A1
NW_018056700.1	genBlastG	coding_exon	3686	3719	.	-	.	ID=ENSP00000266022.4-R1-1-A1-E2;Parent=ENSP00000266022.4-R1-1-A1
NW_018056700.1	genBlastG	coding_exon	3438	3670	.	-	.	ID=ENSP00000266022.4-R1-1-A1-E3;Parent=ENSP00000266022.4-R1-1-A1
NW_018027883.1	genBlastG	transcript	2191	5128	38.38	+	.	ID=ENSLACP00000022624.1-R1-1-A1;Name=ENSLACP00000022624.1;PID=32.12;Coverage=87.73;Note=PID:32.12-Cover:87.73
NW_018027883.1	genBlastG	coding_exon	2191	2199	.	+	.	ID=ENSLACP00000022624.1-R1-1-A1-E1;Parent=ENSLACP00000022624.1-R1-1-A1
NW_018027883.1	genBlastG	coding_exon	3159	3804	.	+	.	ID=ENSLACP00000022624.1-R1-1-A1-E2;Parent=ENSLACP00000022624.1-R1-1-A1
NW_018027883.1	genBlastG	coding_exon	3877	3988	.	+	.	ID=ENSLACP00000022624.1-R1-1-A1-E3;Parent=ENSLACP00000022624.1-R1-1-A1
NW_018027883.1	genBlastG	coding_exon	4004	4013	.	+	.	ID=ENSLACP00000022624.1-R1-1-A1-E4;Parent=ENSLACP00000022624.1-R1-1-A1
NW_018027883.1	genBlastG	coding_exon	4862	4918	.	+	.	ID=ENSLACP00000022624.1-R1-1-A1-E5;Parent=ENSLACP00000022624.1-R1-1-A1
NW_018027883.1	genBlastG	coding_exon	4952	5128	.	+	.	ID=ENSLACP00000022624.1-R1-1-A1-E6;Parent=ENSLACP00000022624.1-R1-1-A1
NW_018063266.1	genBlastG	transcript	3409	5969	34.17	-	.	ID=ENSLACP00000000038.1-R1-1-A1;Name=ENSLACP00000000038.1;PID=32.5;Coverage=97.44;Note=PID:32.5-Cover:97.44
NW_018063266.1	genBlastG	coding_exon	5943	5969	.	-	.	ID=ENSLACP00000000038.1-R1-1-A1-E1;Parent=ENSLACP00000000038.1-R1-1-A1
NW_018063266.1	genBlastG	coding_exon	4333	5026	.	-	.	ID=ENSLACP00000000038.1-R1-1-A1-E2;Parent=ENSLACP00000000038.1-R1-1-A1
NW_018063266.1	genBlastG	coding_exon	3697	3752	.	-	.	ID=ENSLACP00000000038.1-R1-1-A1-E3;Parent=ENSLACP00000000038.1-R1-1-A1
NW_018063266.1	genBlastG	coding_exon	3409	3663	.	-	.	ID=ENSLACP00000000038.1-R1-1-A1-E4;Parent=ENSLACP00000000038.1-R1-1-A1
NW_018066824.1	genBlastG	transcript	2944	3306	30.95	-	.	ID=ENSLACP00000000043.1-R1-1-A1;Name=ENSLACP00000000043.1;PID=49.22;Coverage=88.33;Note=PID:49.22-Cover:88.33
NW_018066824.1	genBlastG	coding_exon	3290	3306	.	-	.	ID=ENSLACP00000000043.1-R1-1-A1-E1;Parent=ENSLACP00000000043.1-R1-1-A1
NW_018066824.1	genBlastG	coding_exon	3011	3268	.	-	.	ID=ENSLACP00000000043.1-R1-1-A1-E2;Parent=ENSLACP00000000043.1-R1-1-A1
NW_018066824.1	genBlastG	coding_exon	2944	2989	.	-	.	ID=ENSLACP00000000043.1-R1-1-A1-E3;Parent=ENSLACP00000000043.1-R1-1-A1
NW_018031174.1	genBlastG	transcript	13463	14733	33.76	-	.	ID=ENSLACP00000000110.1-R1-1-A1;Name=ENSLACP00000000110.1;PID=38.29;Coverage=100;Note=PID:38.29-Cover:100
NW_018031174.1	genBlastG	coding_exon	14334	14733	.	-	.	ID=ENSLACP00000000110.1-R1-1-A1-E1;Parent=ENSLACP00000000110.1-R1-1-A1
NW_018031174.1	genBlastG	coding_exon	14177	14255	.	-	.	ID=ENSLACP00000000110.1-R1-1-A1-E2;Parent=ENSLACP00000000110.1-R1-1-A1
NW_018031174.1	genBlastG	coding_exon	13463	13595	.	-	.	ID=ENSLACP00000000110.1-R1-1-A1-E3;Parent=ENSLACP00000000110.1-R1-1-A1
NW_018036008.1	genBlastG	transcript	12305	13468	24.61	-	.	ID=ENSLACP00000000169.1-R1-1-A1;Name=ENSLACP00000000169.1;PID=29.26;Coverage=100;Note=PID:29.26-Cover:100
NW_018036008.1	genBlastG	coding_exon	13416	13468	.	-	.	ID=ENSLACP00000000169.1-R1-1-A1-E1;Parent=ENSLACP00000000169.1-R1-1-A1
NW_018036008.1	genBlastG	coding_exon	12305	12878	.	-	.	ID=ENSLACP00000000169.1-R1-1-A1-E2;Parent=ENSLACP00000000169.1-R1-1-A1
NW_018036175.1	genBlastG	transcript	28177	29623	21.55	-	.	ID=ENSLACP00000000211.1-R1-1-A1;Name=ENSLACP00000000211.1;PID=29.24;Coverage=89.3;Note=PID:29.24-Cover:89.3
NW_018036175.1	genBlastG	coding_exon	29554	29623	.	-	.	ID=ENSLACP00000000211.1-R1-1-A1-E1;Parent=ENSLACP00000000211.1-R1-1-A1
NW_018036175.1	genBlastG	coding_exon	28701	28727	.	-	.	ID=ENSLACP00000000211.1-R1-1-A1-E2;Parent=ENSLACP00000000211.1-R1-1-A1
NW_018036175.1	genBlastG	coding_exon	28544	28685	.	-	.	ID=ENSLACP00000000211.1-R1-1-A1-E3;Parent=ENSLACP00000000211.1-R1-1-A1
NW_018036175.1	genBlastG	coding_exon	28366	28459	.	-	.	ID=ENSLACP00000000211.1-R1-1-A1-E4;Parent=ENSLACP00000000211.1-R1-1-A1
NW_018036175.1	genBlastG	coding_exon	28177	28347	.	-	.	ID=ENSLACP00000000211.1-R1-1-A1-E5;Parent=ENSLACP00000000211.1-R1-1-A1
NW_018063257.1	genBlastG	transcript	13624	14523	34.55	-	.	ID=ENSLACP00000000255.1-R1-1-A1;Name=ENSLACP00000000255.1;PID=32.81;Coverage=93.15;Note=PID:32.81-Cover:93.15
NW_018063257.1	genBlastG	coding_exon	13624	14523	.	-	.	ID=ENSLACP00000000255.1-R1-1-A1-E1;Parent=ENSLACP00000000255.1-R1-1-A1
NW_018047182.1	genBlastG	transcript	38664	40020	5.281	-	.	ID=ENSLACP00000000292.1-R1-1-A2;Name=ENSLACP00000000292.1;PID=22.48;Coverage=41.7;Note=PID:22.48-Cover:41.7
NW_018047182.1	genBlastG	coding_exon	39978	40020	.	-	.	ID=ENSLACP00000000292.1-R1-1-A2-E1;Parent=ENSLACP00000000292.1-R1-1-A2
NW_018047182.1	genBlastG	coding_exon	39847	39887	.	-	.	ID=ENSLACP00000000292.1-R1-1-A2-E2;Parent=ENSLACP00000000292.1-R1-1-A2
NW_018047182.1	genBlastG	coding_exon	39598	39717	.	-	.	ID=ENSLACP00000000292.1-R1-1-A2-E3;Parent=ENSLACP00000000292.1-R1-1-A2
NW_018047182.1	genBlastG	coding_exon	39494	39513	.	-	.	ID=ENSLACP00000000292.1-R1-1-A2-E4;Parent=ENSLACP00000000292.1-R1-1-A2
NW_018047182.1	genBlastG	coding_exon	39337	39415	.	-	.	ID=ENSLACP00000000292.1-R1-1-A2-E5;Parent=ENSLACP00000000292.1-R1-1-A2
NW_018047182.1	genBlastG	coding_exon	39254	39285	.	-	.	ID=ENSLACP00000000292.1-R1-1-A2-E6;Parent=ENSLACP00000000292.1-R1-1-A2
NW_018047182.1	genBlastG	coding_exon	38979	39115	.	-	.	ID=ENSLACP00000000292.1-R1-1-A2-E7;Parent=ENSLACP00000000292.1-R1-1-A2
NW_018047182.1	genBlastG	coding_exon	38895	38914	.	-	.	ID=ENSLACP00000000292.1-R1-1-A2-E8;Parent=ENSLACP00000000292.1-R1-1-A2
NW_018047182.1	genBlastG	coding_exon	38763	38858	.	-	.	ID=ENSLACP00000000292.1-R1-1-A2-E9;Parent=ENSLACP00000000292.1-R1-1-A2
NW_018047182.1	genBlastG	coding_exon	38706	38732	.	-	.	ID=ENSLACP00000000292.1-R1-1-A2-E10;Parent=ENSLACP00000000292.1-R1-1-A2
NW_018047182.1	genBlastG	coding_exon	38664	38669	.	-	.	ID=ENSLACP00000000292.1-R1-1-A2-E11;Parent=ENSLACP00000000292.1-R1-1-A2
NW_018030281.1	genBlastG	transcript	377166	377882	5.465	-	.	ID=ENSLACP00000000423.1-R1-1-A1;Name=ENSLACP00000000423.1;PID=23.56;Coverage=41.77;Note=PID:23.56-Cover:41.77
NW_018030281.1	genBlastG	coding_exon	377617	377882	.	-	.	ID=ENSLACP00000000423.1-R1-1-A1-E1;Parent=ENSLACP00000000423.1-R1-1-A1
NW_018030281.1	genBlastG	coding_exon	377406	377529	.	-	.	ID=ENSLACP00000000423.1-R1-1-A1-E2;Parent=ENSLACP00000000423.1-R1-1-A1
NW_018030281.1	genBlastG	coding_exon	377321	377345	.	-	.	ID=ENSLACP00000000423.1-R1-1-A1-E3;Parent=ENSLACP00000000423.1-R1-1-A1
NW_018030281.1	genBlastG	coding_exon	377166	377278	.	-	.	ID=ENSLACP00000000423.1-R1-1-A1-E4;Parent=ENSLACP00000000423.1-R1-1-A1
NW_018037725.1	genBlastG	transcript	56293	59281	106	-	.	ID=ENSLACP00000022460.1-R1-1-A1;Name=ENSLACP00000022460.1;PID=31.5;Coverage=100;Note=PID:31.5-Cover:100
NW_018037725.1	genBlastG	coding_exon	59265	59281	.	-	.	ID=ENSLACP00000022460.1-R1-1-A1-E1;Parent=ENSLACP00000022460.1-R1-1-A1
NW_018037725.1	genBlastG	coding_exon	58824	58964	.	-	.	ID=ENSLACP00000022460.1-R1-1-A1-E2;Parent=ENSLACP00000022460.1-R1-1-A1
NW_018037725.1	genBlastG	coding_exon	58190	58810	.	-	.	ID=ENSLACP00000022460.1-R1-1-A1-E3;Parent=ENSLACP00000022460.1-R1-1-A1
NW_018037725.1	genBlastG	coding_exon	57118	58072	.	-	.	ID=ENSLACP00000022460.1-R1-1-A1-E4;Parent=ENSLACP00000022460.1-R1-1-A1
NW_018037725.1	genBlastG	coding_exon	56293	57012	.	-	.	ID=ENSLACP00000022460.1-R1-1-A1-E5;Parent=ENSLACP00000022460.1-R1-1-A1
NW_018041343.1	genBlastG	transcript	59340	60631	34.97	+	.	ID=ENSLACP00000000622.1-R1-1-A1;Name=ENSLACP00000000622.1;PID=28.67;Coverage=67.44;Note=PID:28.67-Cover:67.44
NW_018041343.1	genBlastG	coding_exon	59340	59365	.	+	.	ID=ENSLACP00000000622.1-R1-1-A1-E1;Parent=ENSLACP00000000622.1-R1-1-A1
NW_018041343.1	genBlastG	coding_exon	59549	59691	.	+	.	ID=ENSLACP00000000622.1-R1-1-A1-E2;Parent=ENSLACP00000000622.1-R1-1-A1
NW_018041343.1	genBlastG	coding_exon	59848	59919	.	+	.	ID=ENSLACP00000000622.1-R1-1-A1-E3;Parent=ENSLACP00000000622.1-R1-1-A1
NW_018041343.1	genBlastG	coding_exon	59959	60015	.	+	.	ID=ENSLACP00000000622.1-R1-1-A1-E4;Parent=ENSLACP00000000622.1-R1-1-A1
NW_018041343.1	genBlastG	coding_exon	60070	60245	.	+	.	ID=ENSLACP00000000622.1-R1-1-A1-E5;Parent=ENSLACP00000000622.1-R1-1-A1
NW_018041343.1	genBlastG	coding_exon	60320	60631	.	+	.	ID=ENSLACP00000000622.1-R1-1-A1-E6;Parent=ENSLACP00000000622.1-R1-1-A1
NW_018043143.1	genBlastG	transcript	18070	20258	29.41	-	.	ID=ENSLACP00000000695.1-R1-1-A1;Name=ENSLACP00000000695.1;PID=28.85;Coverage=49.56;Note=PID:28.85-Cover:49.56
NW_018043143.1	genBlastG	coding_exon	20113	20258	.	-	.	ID=ENSLACP00000000695.1-R1-1-A1-E1;Parent=ENSLACP00000000695.1-R1-1-A1
NW_018043143.1	genBlastG	coding_exon	19217	19322	.	-	.	ID=ENSLACP00000000695.1-R1-1-A1-E2;Parent=ENSLACP00000000695.1-R1-1-A1
NW_018043143.1	genBlastG	coding_exon	19185	19204	.	-	.	ID=ENSLACP00000000695.1-R1-1-A1-E3;Parent=ENSLACP00000000695.1-R1-1-A1
NW_018043143.1	genBlastG	coding_exon	19103	19124	.	-	.	ID=ENSLACP00000000695.1-R1-1-A1-E4;Parent=ENSLACP00000000695.1-R1-1-A1
NW_018043143.1	genBlastG	coding_exon	18925	18948	.	-	.	ID=ENSLACP00000000695.1-R1-1-A1-E5;Parent=ENSLACP00000000695.1-R1-1-A1
NW_018043143.1	genBlastG	coding_exon	18852	18873	.	-	.	ID=ENSLACP00000000695.1-R1-1-A1-E6;Parent=ENSLACP00000000695.1-R1-1-A1
NW_018043143.1	genBlastG	coding_exon	18683	18835	.	-	.	ID=ENSLACP00000000695.1-R1-1-A1-E7;Parent=ENSLACP00000000695.1-R1-1-A1
NW_018043143.1	genBlastG	coding_exon	18070	18089	.	-	.	ID=ENSLACP00000000695.1-R1-1-A1-E8;Parent=ENSLACP00000000695.1-R1-1-A1
NW_018035407.1	genBlastG	transcript	5374	5791	52.6	+	.	ID=ENSLACP00000001249.1-R1-1-A1;Name=ENSLACP00000001249.1;PID=70.92;Coverage=92.75;Note=PID:70.92-Cover:92.75
NW_018035407.1	genBlastG	coding_exon	5374	5478	.	+	.	ID=ENSLACP00000001249.1-R1-1-A1-E1;Parent=ENSLACP00000001249.1-R1-1-A1
NW_018035407.1	genBlastG	coding_exon	5495	5746	.	+	.	ID=ENSLACP00000001249.1-R1-1-A1-E2;Parent=ENSLACP00000001249.1-R1-1-A1
NW_018035407.1	genBlastG	coding_exon	5762	5791	.	+	.	ID=ENSLACP00000001249.1-R1-1-A1-E3;Parent=ENSLACP00000001249.1-R1-1-A1
NW_018041530.1	genBlastG	transcript	90415	91626	24.1	+	.	ID=ENSLACP00000001283.1-R1-1-A1;Name=ENSLACP00000001283.1;PID=30.13;Coverage=100;Note=PID:30.13-Cover:100
NW_018041530.1	genBlastG	coding_exon	90415	90578	.	+	.	ID=ENSLACP00000001283.1-R1-1-A1-E1;Parent=ENSLACP00000001283.1-R1-1-A1
NW_018041530.1	genBlastG	coding_exon	91236	91626	.	+	.	ID=ENSLACP00000001283.1-R1-1-A1-E2;Parent=ENSLACP00000001283.1-R1-1-A1
NW_018057862.1	genBlastG	transcript	92933	93509	32.6	+	.	ID=ENSLACP00000001407.1-R1-1-A1;Name=ENSLACP00000001407.1;PID=40.33;Coverage=100;Note=PID:40.33-Cover:100
NW_018057862.1	genBlastG	coding_exon	92933	93004	.	+	.	ID=ENSLACP00000001407.1-R1-1-A1-E1;Parent=ENSLACP00000001407.1-R1-1-A1
NW_018057862.1	genBlastG	coding_exon	93067	93246	.	+	.	ID=ENSLACP00000001407.1-R1-1-A1-E2;Parent=ENSLACP00000001407.1-R1-1-A1
NW_018057862.1	genBlastG	coding_exon	93270	93326	.	+	.	ID=ENSLACP00000001407.1-R1-1-A1-E3;Parent=ENSLACP00000001407.1-R1-1-A1
NW_018057862.1	genBlastG	coding_exon	93348	93509	.	+	.	ID=ENSLACP00000001407.1-R1-1-A1-E4;Parent=ENSLACP00000001407.1-R1-1-A1
NW_018029769.1	genBlastG	transcript	241915	243412	42.49	+	.	ID=ENSLACP00000001523.1-R1-1-A1;Name=ENSLACP00000001523.1;PID=40.49;Coverage=79.09;Note=PID:40.49-Cover:79.09
NW_018029769.1	genBlastG	coding_exon	241915	241931	.	+	.	ID=ENSLACP00000001523.1-R1-1-A1-E1;Parent=ENSLACP00000001523.1-R1-1-A1
NW_018029769.1	genBlastG	coding_exon	242306	242517	.	+	.	ID=ENSLACP00000001523.1-R1-1-A1-E2;Parent=ENSLACP00000001523.1-R1-1-A1
NW_018029769.1	genBlastG	coding_exon	242559	242581	.	+	.	ID=ENSLACP00000001523.1-R1-1-A1-E3;Parent=ENSLACP00000001523.1-R1-1-A1
NW_018029769.1	genBlastG	coding_exon	242597	242715	.	+	.	ID=ENSLACP00000001523.1-R1-1-A1-E4;Parent=ENSLACP00000001523.1-R1-1-A1
NW_018029769.1	genBlastG	coding_exon	242759	242797	.	+	.	ID=ENSLACP00000001523.1-R1-1-A1-E5;Parent=ENSLACP00000001523.1-R1-1-A1
NW_018029769.1	genBlastG	coding_exon	242848	242920	.	+	.	ID=ENSLACP00000001523.1-R1-1-A1-E6;Parent=ENSLACP00000001523.1-R1-1-A1
NW_018029769.1	genBlastG	coding_exon	243371	243412	.	+	.	ID=ENSLACP00000001523.1-R1-1-A1-E7;Parent=ENSLACP00000001523.1-R1-1-A1
NW_018028957.1	genBlastG	transcript	297111	298498	18.23	-	.	ID=ENSLACP00000001587.1-R1-1-A1;Name=ENSLACP00000001587.1;PID=22;Coverage=42.16;Note=PID:22-Cover:42.16
NW_018028957.1	genBlastG	coding_exon	298398	298498	.	-	.	ID=ENSLACP00000001587.1-R1-1-A1-E1;Parent=ENSLACP00000001587.1-R1-1-A1
NW_018028957.1	genBlastG	coding_exon	298230	298294	.	-	.	ID=ENSLACP00000001587.1-R1-1-A1-E2;Parent=ENSLACP00000001587.1-R1-1-A1
NW_018028957.1	genBlastG	coding_exon	298148	298202	.	-	.	ID=ENSLACP00000001587.1-R1-1-A1-E3;Parent=ENSLACP00000001587.1-R1-1-A1
NW_018028957.1	genBlastG	coding_exon	297900	298100	.	-	.	ID=ENSLACP00000001587.1-R1-1-A1-E4;Parent=ENSLACP00000001587.1-R1-1-A1
NW_018028957.1	genBlastG	coding_exon	297152	297198	.	-	.	ID=ENSLACP00000001587.1-R1-1-A1-E5;Parent=ENSLACP00000001587.1-R1-1-A1
NW_018028957.1	genBlastG	coding_exon	297111	297136	.	-	.	ID=ENSLACP00000001587.1-R1-1-A1-E6;Parent=ENSLACP00000001587.1-R1-1-A1
NW_018039185.1	genBlastG	transcript	621	3653	67.12	+	.	ID=ENSLACP00000001642.1-R1-1-A1;Name=ENSLACP00000001642.1;PID=30.33;Coverage=77.37;Note=PID:30.33-Cover:77.37
NW_018039185.1	genBlastG	coding_exon	621	1039	.	+	.	ID=ENSLACP00000001642.1-R1-1-A1-E1;Parent=ENSLACP00000001642.1-R1-1-A1
NW_018039185.1	genBlastG	coding_exon	1088	1201	.	+	.	ID=ENSLACP00000001642.1-R1-1-A1-E2;Parent=ENSLACP00000001642.1-R1-1-A1
NW_018039185.1	genBlastG	coding_exon	1349	2232	.	+	.	ID=ENSLACP00000001642.1-R1-1-A1-E3;Parent=ENSLACP00000001642.1-R1-1-A1
NW_018039185.1	genBlastG	coding_exon	2284	2802	.	+	.	ID=ENSLACP00000001642.1-R1-1-A1-E4;Parent=ENSLACP00000001642.1-R1-1-A1
NW_018039185.1	genBlastG	coding_exon	3628	3653	.	+	.	ID=ENSLACP00000001642.1-R1-1-A1-E5;Parent=ENSLACP00000001642.1-R1-1-A1
NW_018039314.1	genBlastG	transcript	93144	94443	31.89	+	.	ID=ENSLACP00000001647.1-R1-1-A1;Name=ENSLACP00000001647.1;PID=30.56;Coverage=85.55;Note=PID:30.56-Cover:85.55
NW_018039314.1	genBlastG	coding_exon	93144	93230	.	+	.	ID=ENSLACP00000001647.1-R1-1-A1-E1;Parent=ENSLACP00000001647.1-R1-1-A1
NW_018039314.1	genBlastG	coding_exon	93318	93376	.	+	.	ID=ENSLACP00000001647.1-R1-1-A1-E2;Parent=ENSLACP00000001647.1-R1-1-A1
NW_018039314.1	genBlastG	coding_exon	93389	93442	.	+	.	ID=ENSLACP00000001647.1-R1-1-A1-E3;Parent=ENSLACP00000001647.1-R1-1-A1
NW_018039314.1	genBlastG	coding_exon	93545	93584	.	+	.	ID=ENSLACP00000001647.1-R1-1-A1-E4;Parent=ENSLACP00000001647.1-R1-1-A1
NW_018039314.1	genBlastG	coding_exon	93668	93976	.	+	.	ID=ENSLACP00000001647.1-R1-1-A1-E5;Parent=ENSLACP00000001647.1-R1-1-A1
NW_018039314.1	genBlastG	coding_exon	94315	94443	.	+	.	ID=ENSLACP00000001647.1-R1-1-A1-E6;Parent=ENSLACP00000001647.1-R1-1-A1
NW_018047308.1	genBlastG	transcript	19131	20402	63.93	-	.	ID=ENSLACP00000001695.1-R1-1-A1;Name=ENSLACP00000001695.1;PID=33.18;Coverage=100;Note=PID:33.18-Cover:100
NW_018047308.1	genBlastG	coding_exon	20172	20402	.	-	.	ID=ENSLACP00000001695.1-R1-1-A1-E1;Parent=ENSLACP00000001695.1-R1-1-A1
NW_018047308.1	genBlastG	coding_exon	19997	20159	.	-	.	ID=ENSLACP00000001695.1-R1-1-A1-E2;Parent=ENSLACP00000001695.1-R1-1-A1
NW_018047308.1	genBlastG	coding_exon	19912	19942	.	-	.	ID=ENSLACP00000001695.1-R1-1-A1-E3;Parent=ENSLACP00000001695.1-R1-1-A1
NW_018047308.1	genBlastG	coding_exon	19131	19899	.	-	.	ID=ENSLACP00000001695.1-R1-1-A1-E4;Parent=ENSLACP00000001695.1-R1-1-A1
NW_018034409.1	genBlastG	transcript	139237	140139	44.51	-	.	ID=ENSLACP00000022250.1-R1-1-A1;Name=ENSLACP00000022250.1;PID=39.16;Coverage=100;Note=PID:39.16-Cover:100
NW_018034409.1	genBlastG	coding_exon	139237	140139	.	-	.	ID=ENSLACP00000022250.1-R1-1-A1-E1;Parent=ENSLACP00000022250.1-R1-1-A1
NW_018047053.1	genBlastG	transcript	17056	18613	32.46	+	.	ID=ENSLACP00000022304.1-R1-1-A1;Name=ENSLACP00000022304.1;PID=46.23;Coverage=99.45;Note=PID:46.23-Cover:99.45
NW_018047053.1	genBlastG	coding_exon	17056	17188	.	+	.	ID=ENSLACP00000022304.1-R1-1-A1-E1;Parent=ENSLACP00000022304.1-R1-1-A1
NW_018047053.1	genBlastG	coding_exon	17512	17715	.	+	.	ID=ENSLACP00000022304.1-R1-1-A1-E2;Parent=ENSLACP00000022304.1-R1-1-A1
NW_018047053.1	genBlastG	coding_exon	18405	18613	.	+	.	ID=ENSLACP00000022304.1-R1-1-A1-E3;Parent=ENSLACP00000022304.1-R1-1-A1
NW_018035941.1	genBlastG	transcript	67460	69212	26.03	-	.	ID=ENSLACP00000001812.1-R1-1-A1;Name=ENSLACP00000001812.1;PID=31.42;Coverage=82.67;Note=PID:31.42-Cover:82.67
NW_018035941.1	genBlastG	coding_exon	68805	69212	.	-	.	ID=ENSLACP00000001812.1-R1-1-A1-E1;Parent=ENSLACP00000001812.1-R1-1-A1
NW_018035941.1	genBlastG	coding_exon	68575	68771	.	-	.	ID=ENSLACP00000001812.1-R1-1-A1-E2;Parent=ENSLACP00000001812.1-R1-1-A1
NW_018035941.1	genBlastG	coding_exon	68515	68535	.	-	.	ID=ENSLACP00000001812.1-R1-1-A1-E3;Parent=ENSLACP00000001812.1-R1-1-A1
NW_018035941.1	genBlastG	coding_exon	67963	68355	.	-	.	ID=ENSLACP00000001812.1-R1-1-A1-E4;Parent=ENSLACP00000001812.1-R1-1-A1
NW_018035941.1	genBlastG	coding_exon	67711	67796	.	-	.	ID=ENSLACP00000001812.1-R1-1-A1-E5;Parent=ENSLACP00000001812.1-R1-1-A1
NW_018035941.1	genBlastG	coding_exon	67460	67659	.	-	.	ID=ENSLACP00000001812.1-R1-1-A1-E6;Parent=ENSLACP00000001812.1-R1-1-A1
NW_018033737.1	genBlastG	transcript	123848	124861	43.2	+	.	ID=ENSLACP00000001822.1-R1-1-A1;Name=ENSLACP00000001822.1;PID=30.2;Coverage=100;Note=PID:30.2-Cover:100
NW_018033737.1	genBlastG	coding_exon	123848	124165	.	+	.	ID=ENSLACP00000001822.1-R1-1-A1-E1;Parent=ENSLACP00000001822.1-R1-1-A1
NW_018033737.1	genBlastG	coding_exon	124199	124861	.	+	.	ID=ENSLACP00000001822.1-R1-1-A1-E2;Parent=ENSLACP00000001822.1-R1-1-A1
NW_018034366.1	genBlastG	transcript	21398	22098	26.98	+	.	ID=ENSLACP00000002036.1-R1-1-A1;Name=ENSLACP00000002036.1;PID=37.79;Coverage=75.16;Note=PID:37.79-Cover:75.16
NW_018034366.1	genBlastG	coding_exon	21398	21444	.	+	.	ID=ENSLACP00000002036.1-R1-1-A1-E1;Parent=ENSLACP00000002036.1-R1-1-A1
NW_018034366.1	genBlastG	coding_exon	21531	21684	.	+	.	ID=ENSLACP00000002036.1-R1-1-A1-E2;Parent=ENSLACP00000002036.1-R1-1-A1
NW_018034366.1	genBlastG	coding_exon	21710	21816	.	+	.	ID=ENSLACP00000002036.1-R1-1-A1-E3;Parent=ENSLACP00000002036.1-R1-1-A1
NW_018034366.1	genBlastG	coding_exon	21904	21938	.	+	.	ID=ENSLACP00000002036.1-R1-1-A1-E4;Parent=ENSLACP00000002036.1-R1-1-A1
NW_018034366.1	genBlastG	coding_exon	22085	22098	.	+	.	ID=ENSLACP00000002036.1-R1-1-A1-E5;Parent=ENSLACP00000002036.1-R1-1-A1
NW_018063406.1	genBlastG	transcript	2511	3075	18	-	.	ID=ENSLACP00000002039.1-R1-1-A1;Name=ENSLACP00000002039.1;PID=27.01;Coverage=59.01;Note=PID:27.01-Cover:59.01
NW_018063406.1	genBlastG	coding_exon	2995	3075	.	-	.	ID=ENSLACP00000002039.1-R1-1-A1-E1;Parent=ENSLACP00000002039.1-R1-1-A1
NW_018063406.1	genBlastG	coding_exon	2874	2929	.	-	.	ID=ENSLACP00000002039.1-R1-1-A1-E2;Parent=ENSLACP00000002039.1-R1-1-A1
NW_018063406.1	genBlastG	coding_exon	2726	2756	.	-	.	ID=ENSLACP00000002039.1-R1-1-A1-E3;Parent=ENSLACP00000002039.1-R1-1-A1
NW_018063406.1	genBlastG	coding_exon	2511	2630	.	-	.	ID=ENSLACP00000002039.1-R1-1-A1-E4;Parent=ENSLACP00000002039.1-R1-1-A1
NW_018038404.1	genBlastG	transcript	113611	115516	52.67	-	.	ID=ENSLACP00000002130.1-R1-1-A1;Name=ENSLACP00000002130.1;PID=13.04;Coverage=20.5;Note=PID:13.04-Cover:20.5
NW_018038404.1	genBlastG	coding_exon	115462	115516	.	-	.	ID=ENSLACP00000002130.1-R1-1-A1-E1;Parent=ENSLACP00000002130.1-R1-1-A1
NW_018038404.1	genBlastG	coding_exon	113699	113786	.	-	.	ID=ENSLACP00000002130.1-R1-1-A1-E2;Parent=ENSLACP00000002130.1-R1-1-A1
NW_018038404.1	genBlastG	coding_exon	113611	113668	.	-	.	ID=ENSLACP00000002130.1-R1-1-A1-E3;Parent=ENSLACP00000002130.1-R1-1-A1
NW_018070405.1	genBlastG	transcript	53031	53588	31.13	-	.	ID=ENSLACP00000002164.1-R1-1-A1;Name=ENSLACP00000002164.1;PID=37.5;Coverage=100;Note=PID:37.5-Cover:100
NW_018070405.1	genBlastG	coding_exon	53031	53588	.	-	.	ID=ENSLACP00000002164.1-R1-1-A1-E1;Parent=ENSLACP00000002164.1-R1-1-A1
NW_018043825.1	genBlastG	transcript	69873	70877	34.52	-	.	ID=ENSLACP00000002313.1-R1-1-A1;Name=ENSLACP00000002313.1;PID=29.53;Coverage=70.16;Note=PID:29.53-Cover:70.16
NW_018043825.1	genBlastG	coding_exon	70834	70877	.	-	.	ID=ENSLACP00000002313.1-R1-1-A1-E1;Parent=ENSLACP00000002313.1-R1-1-A1
NW_018043825.1	genBlastG	coding_exon	70717	70818	.	-	.	ID=ENSLACP00000002313.1-R1-1-A1-E2;Parent=ENSLACP00000002313.1-R1-1-A1
NW_018043825.1	genBlastG	coding_exon	70286	70602	.	-	.	ID=ENSLACP00000002313.1-R1-1-A1-E3;Parent=ENSLACP00000002313.1-R1-1-A1
NW_018043825.1	genBlastG	coding_exon	70244	70264	.	-	.	ID=ENSLACP00000002313.1-R1-1-A1-E4;Parent=ENSLACP00000002313.1-R1-1-A1
NW_018043825.1	genBlastG	coding_exon	70126	70150	.	-	.	ID=ENSLACP00000002313.1-R1-1-A1-E5;Parent=ENSLACP00000002313.1-R1-1-A1
NW_018043825.1	genBlastG	coding_exon	70024	70077	.	-	.	ID=ENSLACP00000002313.1-R1-1-A1-E6;Parent=ENSLACP00000002313.1-R1-1-A1
NW_018043825.1	genBlastG	coding_exon	69873	69975	.	-	.	ID=ENSLACP00000002313.1-R1-1-A1-E7;Parent=ENSLACP00000002313.1-R1-1-A1
NW_018079275.1	genBlastG	transcript	53291	54518	24.29	+	.	ID=ENSLACP00000002480.1-R1-1-A1;Name=ENSLACP00000002480.1;PID=30.86;Coverage=74.03;Note=PID:30.86-Cover:74.03
NW_018079275.1	genBlastG	coding_exon	53291	53410	.	+	.	ID=ENSLACP00000002480.1-R1-1-A1-E1;Parent=ENSLACP00000002480.1-R1-1-A1
NW_018079275.1	genBlastG	coding_exon	54123	54284	.	+	.	ID=ENSLACP00000002480.1-R1-1-A1-E2;Parent=ENSLACP00000002480.1-R1-1-A1
NW_018079275.1	genBlastG	coding_exon	54456	54518	.	+	.	ID=ENSLACP00000002480.1-R1-1-A1-E3;Parent=ENSLACP00000002480.1-R1-1-A1
NW_018075094.1	genBlastG	transcript	82381	83000	27.55	-	.	ID=ENSLACP00000002526.1-R1-1-A1;Name=ENSLACP00000002526.1;PID=31.28;Coverage=100;Note=PID:31.28-Cover:100
NW_018075094.1	genBlastG	coding_exon	82764	83000	.	-	.	ID=ENSLACP00000002526.1-R1-1-A1-E1;Parent=ENSLACP00000002526.1-R1-1-A1
NW_018075094.1	genBlastG	coding_exon	82381	82734	.	-	.	ID=ENSLACP00000002526.1-R1-1-A1-E2;Parent=ENSLACP00000002526.1-R1-1-A1
NW_018080875.1	genBlastG	transcript	2885	4741	40.5	+	.	ID=ENSLACP00000002585.1-R1-1-A1;Name=ENSLACP00000002585.1;PID=16.24;Coverage=100;Note=PID:16.24-Cover:100
NW_018080875.1	genBlastG	coding_exon	2885	4741	.	+	.	ID=ENSLACP00000002585.1-R1-1-A1-E1;Parent=ENSLACP00000002585.1-R1-1-A1
NW_018028544.1	genBlastG	transcript	354825	366827	47.16	+	.	ID=ENSLACP00000002587.1-R1-1-A1;Name=ENSLACP00000002587.1;PID=29.84;Coverage=47.15;Note=PID:29.84-Cover:47.15
NW_018028544.1	genBlastG	coding_exon	354825	354834	.	+	.	ID=ENSLACP00000002587.1-R1-1-A1-E1;Parent=ENSLACP00000002587.1-R1-1-A1
NW_018028544.1	genBlastG	coding_exon	355356	355405	.	+	.	ID=ENSLACP00000002587.1-R1-1-A1-E2;Parent=ENSLACP00000002587.1-R1-1-A1
NW_018028544.1	genBlastG	coding_exon	355447	355504	.	+	.	ID=ENSLACP00000002587.1-R1-1-A1-E3;Parent=ENSLACP00000002587.1-R1-1-A1
NW_018028544.1	genBlastG	coding_exon	366010	366092	.	+	.	ID=ENSLACP00000002587.1-R1-1-A1-E4;Parent=ENSLACP00000002587.1-R1-1-A1
NW_018028544.1	genBlastG	coding_exon	366138	366202	.	+	.	ID=ENSLACP00000002587.1-R1-1-A1-E5;Parent=ENSLACP00000002587.1-R1-1-A1
NW_018028544.1	genBlastG	coding_exon	366275	366402	.	+	.	ID=ENSLACP00000002587.1-R1-1-A1-E6;Parent=ENSLACP00000002587.1-R1-1-A1
NW_018028544.1	genBlastG	coding_exon	366435	366710	.	+	.	ID=ENSLACP00000002587.1-R1-1-A1-E7;Parent=ENSLACP00000002587.1-R1-1-A1
NW_018028544.1	genBlastG	coding_exon	366727	366827	.	+	.	ID=ENSLACP00000002587.1-R1-1-A1-E8;Parent=ENSLACP00000002587.1-R1-1-A1
NW_018041299.1	genBlastG	transcript	64554	67965	83.57	-	.	ID=ENSLACP00000002702.1-R1-1-A1;Name=ENSLACP00000002702.1;PID=29.02;Coverage=70.4;Note=PID:29.02-Cover:70.4
NW_018041299.1	genBlastG	coding_exon	67881	67965	.	-	.	ID=ENSLACP00000002702.1-R1-1-A1-E1;Parent=ENSLACP00000002702.1-R1-1-A1
NW_018041299.1	genBlastG	coding_exon	67653	67697	.	-	.	ID=ENSLACP00000002702.1-R1-1-A1-E2;Parent=ENSLACP00000002702.1-R1-1-A1
NW_018041299.1	genBlastG	coding_exon	67451	67595	.	-	.	ID=ENSLACP00000002702.1-R1-1-A1-E3;Parent=ENSLACP00000002702.1-R1-1-A1
NW_018041299.1	genBlastG	coding_exon	67336	67414	.	-	.	ID=ENSLACP00000002702.1-R1-1-A1-E4;Parent=ENSLACP00000002702.1-R1-1-A1
NW_018041299.1	genBlastG	coding_exon	67201	67302	.	-	.	ID=ENSLACP00000002702.1-R1-1-A1-E5;Parent=ENSLACP00000002702.1-R1-1-A1
NW_018041299.1	genBlastG	coding_exon	67063	67176	.	-	.	ID=ENSLACP00000002702.1-R1-1-A1-E6;Parent=ENSLACP00000002702.1-R1-1-A1
NW_018041299.1	genBlastG	coding_exon	66907	67032	.	-	.	ID=ENSLACP00000002702.1-R1-1-A1-E7;Parent=ENSLACP00000002702.1-R1-1-A1
NW_018041299.1	genBlastG	coding_exon	66825	66885	.	-	.	ID=ENSLACP00000002702.1-R1-1-A1-E8;Parent=ENSLACP00000002702.1-R1-1-A1
NW_018041299.1	genBlastG	coding_exon	66766	66782	.	-	.	ID=ENSLACP00000002702.1-R1-1-A1-E9;Parent=ENSLACP00000002702.1-R1-1-A1
NW_018041299.1	genBlastG	coding_exon	66573	66751	.	-	.	ID=ENSLACP00000002702.1-R1-1-A1-E10;Parent=ENSLACP00000002702.1-R1-1-A1
NW_018041299.1	genBlastG	coding_exon	66266	66557	.	-	.	ID=ENSLACP00000002702.1-R1-1-A1-E11;Parent=ENSLACP00000002702.1-R1-1-A1
NW_018041299.1	genBlastG	coding_exon	66219	66221	.	-	.	ID=ENSLACP00000002702.1-R1-1-A1-E12;Parent=ENSLACP00000002702.1-R1-1-A1
NW_018041299.1	genBlastG	coding_exon	66175	66200	.	-	.	ID=ENSLACP00000002702.1-R1-1-A1-E13;Parent=ENSLACP00000002702.1-R1-1-A1
NW_018041299.1	genBlastG	coding_exon	66068	66100	.	-	.	ID=ENSLACP00000002702.1-R1-1-A1-E14;Parent=ENSLACP00000002702.1-R1-1-A1
NW_018041299.1	genBlastG	coding_exon	65500	66042	.	-	.	ID=ENSLACP00000002702.1-R1-1-A1-E15;Parent=ENSLACP00000002702.1-R1-1-A1
NW_018041299.1	genBlastG	coding_exon	65273	65415	.	-	.	ID=ENSLACP00000002702.1-R1-1-A1-E16;Parent=ENSLACP00000002702.1-R1-1-A1
NW_018041299.1	genBlastG	coding_exon	64828	64906	.	-	.	ID=ENSLACP00000002702.1-R1-1-A1-E17;Parent=ENSLACP00000002702.1-R1-1-A1
NW_018041299.1	genBlastG	coding_exon	64672	64701	.	-	.	ID=ENSLACP00000002702.1-R1-1-A1-E18;Parent=ENSLACP00000002702.1-R1-1-A1
NW_018041299.1	genBlastG	coding_exon	64554	64623	.	-	.	ID=ENSLACP00000002702.1-R1-1-A1-E19;Parent=ENSLACP00000002702.1-R1-1-A1
NW_018030326.1	genBlastG	transcript	370274	372815	120.1	-	.	ID=ENSLACP00000002770.1-R1-1-A1;Name=ENSLACP00000002770.1;PID=34.33;Coverage=82.22;Note=PID:34.33-Cover:82.22
NW_018030326.1	genBlastG	coding_exon	372350	372815	.	-	.	ID=ENSLACP00000002770.1-R1-1-A1-E1;Parent=ENSLACP00000002770.1-R1-1-A1
NW_018030326.1	genBlastG	coding_exon	372242	372318	.	-	.	ID=ENSLACP00000002770.1-R1-1-A1-E2;Parent=ENSLACP00000002770.1-R1-1-A1
NW_018030326.1	genBlastG	coding_exon	372076	372207	.	-	.	ID=ENSLACP00000002770.1-R1-1-A1-E3;Parent=ENSLACP00000002770.1-R1-1-A1
NW_018030326.1	genBlastG	coding_exon	372021	372060	.	-	.	ID=ENSLACP00000002770.1-R1-1-A1-E4;Parent=ENSLACP00000002770.1-R1-1-A1
NW_018030326.1	genBlastG	coding_exon	371773	371951	.	-	.	ID=ENSLACP00000002770.1-R1-1-A1-E5;Parent=ENSLACP00000002770.1-R1-1-A1
NW_018030326.1	genBlastG	coding_exon	371538	371736	.	-	.	ID=ENSLACP00000002770.1-R1-1-A1-E6;Parent=ENSLACP00000002770.1-R1-1-A1
NW_018030326.1	genBlastG	coding_exon	371470	371501	.	-	.	ID=ENSLACP00000002770.1-R1-1-A1-E7;Parent=ENSLACP00000002770.1-R1-1-A1
NW_018030326.1	genBlastG	coding_exon	371297	371421	.	-	.	ID=ENSLACP00000002770.1-R1-1-A1-E8;Parent=ENSLACP00000002770.1-R1-1-A1
NW_018030326.1	genBlastG	coding_exon	371133	371239	.	-	.	ID=ENSLACP00000002770.1-R1-1-A1-E9;Parent=ENSLACP00000002770.1-R1-1-A1
NW_018030326.1	genBlastG	coding_exon	371089	371119	.	-	.	ID=ENSLACP00000002770.1-R1-1-A1-E10;Parent=ENSLACP00000002770.1-R1-1-A1
NW_018030326.1	genBlastG	coding_exon	371012	371069	.	-	.	ID=ENSLACP00000002770.1-R1-1-A1-E11;Parent=ENSLACP00000002770.1-R1-1-A1
NW_018030326.1	genBlastG	coding_exon	370980	370999	.	-	.	ID=ENSLACP00000002770.1-R1-1-A1-E12;Parent=ENSLACP00000002770.1-R1-1-A1
NW_018030326.1	genBlastG	coding_exon	370737	370958	.	-	.	ID=ENSLACP00000002770.1-R1-1-A1-E13;Parent=ENSLACP00000002770.1-R1-1-A1
NW_018030326.1	genBlastG	coding_exon	370522	370694	.	-	.	ID=ENSLACP00000002770.1-R1-1-A1-E14;Parent=ENSLACP00000002770.1-R1-1-A1
NW_018030326.1	genBlastG	coding_exon	370366	370437	.	-	.	ID=ENSLACP00000002770.1-R1-1-A1-E15;Parent=ENSLACP00000002770.1-R1-1-A1
NW_018030326.1	genBlastG	coding_exon	370274	370341	.	-	.	ID=ENSLACP00000002770.1-R1-1-A1-E16;Parent=ENSLACP00000002770.1-R1-1-A1
NW_018071633.1	genBlastG	transcript	75919	77408	32.08	+	.	ID=ENSLACP00000002924.1-R1-1-A1;Name=ENSLACP00000002924.1;PID=28.92;Coverage=100;Note=PID:28.92-Cover:100
NW_018071633.1	genBlastG	coding_exon	75919	76262	.	+	.	ID=ENSLACP00000002924.1-R1-1-A1-E1;Parent=ENSLACP00000002924.1-R1-1-A1
NW_018071633.1	genBlastG	coding_exon	76278	76545	.	+	.	ID=ENSLACP00000002924.1-R1-1-A1-E2;Parent=ENSLACP00000002924.1-R1-1-A1
NW_018071633.1	genBlastG	coding_exon	76567	76681	.	+	.	ID=ENSLACP00000002924.1-R1-1-A1-E3;Parent=ENSLACP00000002924.1-R1-1-A1
NW_018071633.1	genBlastG	coding_exon	76718	76781	.	+	.	ID=ENSLACP00000002924.1-R1-1-A1-E4;Parent=ENSLACP00000002924.1-R1-1-A1
NW_018071633.1	genBlastG	coding_exon	77330	77408	.	+	.	ID=ENSLACP00000002924.1-R1-1-A1-E5;Parent=ENSLACP00000002924.1-R1-1-A1
NW_018033791.1	genBlastG	transcript	5	1538	28.29	-	.	ID=ENSLACP00000002926.1-R1-1-A1;Name=ENSLACP00000002926.1;PID=37.24;Coverage=89.14;Note=PID:37.24-Cover:89.14
NW_018033791.1	genBlastG	coding_exon	1524	1538	.	-	.	ID=ENSLACP00000002926.1-R1-1-A1-E1;Parent=ENSLACP00000002926.1-R1-1-A1
NW_018033791.1	genBlastG	coding_exon	499	619	.	-	.	ID=ENSLACP00000002926.1-R1-1-A1-E2;Parent=ENSLACP00000002926.1-R1-1-A1
NW_018033791.1	genBlastG	coding_exon	171	480	.	-	.	ID=ENSLACP00000002926.1-R1-1-A1-E3;Parent=ENSLACP00000002926.1-R1-1-A1
NW_018033791.1	genBlastG	coding_exon	5	26	.	-	.	ID=ENSLACP00000002926.1-R1-1-A1-E4;Parent=ENSLACP00000002926.1-R1-1-A1
NW_018058319.1	genBlastG	transcript	609	4416	135.9	+	.	ID=ENSLACP00000002941.1-R1-1-A1;Name=ENSLACP00000002941.1;PID=32.19;Coverage=100;Note=PID:32.19-Cover:100
NW_018058319.1	genBlastG	coding_exon	609	982	.	+	.	ID=ENSLACP00000002941.1-R1-1-A1-E1;Parent=ENSLACP00000002941.1-R1-1-A1
NW_018058319.1	genBlastG	coding_exon	1031	1439	.	+	.	ID=ENSLACP00000002941.1-R1-1-A1-E2;Parent=ENSLACP00000002941.1-R1-1-A1
NW_018058319.1	genBlastG	coding_exon	1468	1600	.	+	.	ID=ENSLACP00000002941.1-R1-1-A1-E3;Parent=ENSLACP00000002941.1-R1-1-A1
NW_018058319.1	genBlastG	coding_exon	1642	1808	.	+	.	ID=ENSLACP00000002941.1-R1-1-A1-E4;Parent=ENSLACP00000002941.1-R1-1-A1
NW_018058319.1	genBlastG	coding_exon	1820	3063	.	+	.	ID=ENSLACP00000002941.1-R1-1-A1-E5;Parent=ENSLACP00000002941.1-R1-1-A1
NW_018058319.1	genBlastG	coding_exon	3130	3300	.	+	.	ID=ENSLACP00000002941.1-R1-1-A1-E6;Parent=ENSLACP00000002941.1-R1-1-A1
NW_018058319.1	genBlastG	coding_exon	3357	3716	.	+	.	ID=ENSLACP00000002941.1-R1-1-A1-E7;Parent=ENSLACP00000002941.1-R1-1-A1
NW_018058319.1	genBlastG	coding_exon	3738	3739	.	+	.	ID=ENSLACP00000002941.1-R1-1-A1-E8;Parent=ENSLACP00000002941.1-R1-1-A1
NW_018058319.1	genBlastG	coding_exon	3827	4416	.	+	.	ID=ENSLACP00000002941.1-R1-1-A1-E9;Parent=ENSLACP00000002941.1-R1-1-A1
NW_018060058.1	genBlastG	transcript	210810	212204	17.26	-	.	ID=ENSLACP00000003032.1-R1-1-A1;Name=ENSLACP00000003032.1;PID=27.91;Coverage=59.26;Note=PID:27.91-Cover:59.26
NW_018060058.1	genBlastG	coding_exon	212172	212204	.	-	.	ID=ENSLACP00000003032.1-R1-1-A1-E1;Parent=ENSLACP00000003032.1-R1-1-A1
NW_018060058.1	genBlastG	coding_exon	212117	212141	.	-	.	ID=ENSLACP00000003032.1-R1-1-A1-E2;Parent=ENSLACP00000003032.1-R1-1-A1
NW_018060058.1	genBlastG	coding_exon	212021	212104	.	-	.	ID=ENSLACP00000003032.1-R1-1-A1-E3;Parent=ENSLACP00000003032.1-R1-1-A1
NW_018060058.1	genBlastG	coding_exon	211947	212008	.	-	.	ID=ENSLACP00000003032.1-R1-1-A1-E4;Parent=ENSLACP00000003032.1-R1-1-A1
NW_018060058.1	genBlastG	coding_exon	211888	211919	.	-	.	ID=ENSLACP00000003032.1-R1-1-A1-E5;Parent=ENSLACP00000003032.1-R1-1-A1
NW_018060058.1	genBlastG	coding_exon	211802	211818	.	-	.	ID=ENSLACP00000003032.1-R1-1-A1-E6;Parent=ENSLACP00000003032.1-R1-1-A1
NW_018060058.1	genBlastG	coding_exon	210810	210847	.	-	.	ID=ENSLACP00000003032.1-R1-1-A1-E7;Parent=ENSLACP00000003032.1-R1-1-A1
NW_018050019.1	genBlastG	transcript	28278	29381	29.36	+	.	ID=ENSLACP00000003070.1-R1-1-A1;Name=ENSLACP00000003070.1;PID=29.21;Coverage=100;Note=PID:29.21-Cover:100
NW_018050019.1	genBlastG	coding_exon	28278	28688	.	+	.	ID=ENSLACP00000003070.1-R1-1-A1-E1;Parent=ENSLACP00000003070.1-R1-1-A1
NW_018050019.1	genBlastG	coding_exon	28767	28847	.	+	.	ID=ENSLACP00000003070.1-R1-1-A1-E2;Parent=ENSLACP00000003070.1-R1-1-A1
NW_018050019.1	genBlastG	coding_exon	28878	29381	.	+	.	ID=ENSLACP00000003070.1-R1-1-A1-E3;Parent=ENSLACP00000003070.1-R1-1-A1
NW_018043282.1	genBlastG	transcript	32477	33969	24.46	+	.	ID=ENSLACP00000003090.1-R1-1-A1;Name=ENSLACP00000003090.1;PID=28.18;Coverage=71.89;Note=PID:28.18-Cover:71.89
NW_018043282.1	genBlastG	coding_exon	32477	32532	.	+	.	ID=ENSLACP00000003090.1-R1-1-A1-E1;Parent=ENSLACP00000003090.1-R1-1-A1
NW_018043282.1	genBlastG	coding_exon	32581	32600	.	+	.	ID=ENSLACP00000003090.1-R1-1-A1-E2;Parent=ENSLACP00000003090.1-R1-1-A1
NW_018043282.1	genBlastG	coding_exon	32684	32944	.	+	.	ID=ENSLACP00000003090.1-R1-1-A1-E3;Parent=ENSLACP00000003090.1-R1-1-A1
NW_018043282.1	genBlastG	coding_exon	33017	33173	.	+	.	ID=ENSLACP00000003090.1-R1-1-A1-E4;Parent=ENSLACP00000003090.1-R1-1-A1
NW_018043282.1	genBlastG	coding_exon	33213	33265	.	+	.	ID=ENSLACP00000003090.1-R1-1-A1-E5;Parent=ENSLACP00000003090.1-R1-1-A1
NW_018043282.1	genBlastG	coding_exon	33302	33371	.	+	.	ID=ENSLACP00000003090.1-R1-1-A1-E6;Parent=ENSLACP00000003090.1-R1-1-A1
NW_018043282.1	genBlastG	coding_exon	33786	33969	.	+	.	ID=ENSLACP00000003090.1-R1-1-A1-E7;Parent=ENSLACP00000003090.1-R1-1-A1
NW_018032726.1	genBlastG	transcript	139637	140139	36.7	+	.	ID=ENSLACP00000003334.1-R1-1-A1;Name=ENSLACP00000003334.1;PID=35.43;Coverage=65.27;Note=PID:35.43-Cover:65.27
NW_018032726.1	genBlastG	coding_exon	139637	139639	.	+	.	ID=ENSLACP00000003334.1-R1-1-A1-E1;Parent=ENSLACP00000003334.1-R1-1-A1
NW_018032726.1	genBlastG	coding_exon	139794	139970	.	+	.	ID=ENSLACP00000003334.1-R1-1-A1-E2;Parent=ENSLACP00000003334.1-R1-1-A1
NW_018032726.1	genBlastG	coding_exon	139990	140139	.	+	.	ID=ENSLACP00000003334.1-R1-1-A1-E3;Parent=ENSLACP00000003334.1-R1-1-A1
NW_018034637.1	genBlastG	transcript	12247	15593	208.4	+	.	ID=ENSLACP00000003393.1-R1-1-A1;Name=ENSLACP00000003393.1;PID=38.75;Coverage=100;Note=PID:38.75-Cover:100
NW_018034637.1	genBlastG	coding_exon	12247	12568	.	+	.	ID=ENSLACP00000003393.1-R1-1-A1-E1;Parent=ENSLACP00000003393.1-R1-1-A1
NW_018034637.1	genBlastG	coding_exon	13703	14098	.	+	.	ID=ENSLACP00000003393.1-R1-1-A1-E2;Parent=ENSLACP00000003393.1-R1-1-A1
NW_018034637.1	genBlastG	coding_exon	14933	14989	.	+	.	ID=ENSLACP00000003393.1-R1-1-A1-E3;Parent=ENSLACP00000003393.1-R1-1-A1
NW_018034637.1	genBlastG	coding_exon	15544	15593	.	+	.	ID=ENSLACP00000003393.1-R1-1-A1-E4;Parent=ENSLACP00000003393.1-R1-1-A1
NW_018031437.1	genBlastG	transcript	10313	12469	150.8	+	.	ID=ENSLACP00000003517.1-R1-1-A1;Name=ENSLACP00000003517.1;PID=43.08;Coverage=100;Note=PID:43.08-Cover:100
NW_018031437.1	genBlastG	coding_exon	10313	11445	.	+	.	ID=ENSLACP00000003517.1-R1-1-A1-E1;Parent=ENSLACP00000003517.1-R1-1-A1
NW_018031437.1	genBlastG	coding_exon	11482	11727	.	+	.	ID=ENSLACP00000003517.1-R1-1-A1-E2;Parent=ENSLACP00000003517.1-R1-1-A1
NW_018031437.1	genBlastG	coding_exon	11740	12469	.	+	.	ID=ENSLACP00000003517.1-R1-1-A1-E3;Parent=ENSLACP00000003517.1-R1-1-A1
NW_018037665.1	genBlastG	transcript	97538	98281	21.47	-	.	ID=ENSLACP00000022980.1-R1-1-A1;Name=ENSLACP00000022980.1;PID=40.52;Coverage=97.76;Note=PID:40.52-Cover:97.76
NW_018037665.1	genBlastG	coding_exon	98260	98281	.	-	.	ID=ENSLACP00000022980.1-R1-1-A1-E1;Parent=ENSLACP00000022980.1-R1-1-A1
NW_018037665.1	genBlastG	coding_exon	97538	97911	.	-	.	ID=ENSLACP00000022980.1-R1-1-A1-E2;Parent=ENSLACP00000022980.1-R1-1-A1
NW_018037665.1	genBlastG	transcript	104996	105739	21.47	-	.	ID=ENSLACP00000022980.1-R1-2-A1;Name=ENSLACP00000022980.1;PID=40.52;Coverage=97.76;Note=PID:40.52-Cover:97.76
NW_018037665.1	genBlastG	coding_exon	105718	105739	.	-	.	ID=ENSLACP00000022980.1-R1-2-A1-E1;Parent=ENSLACP00000022980.1-R1-2-A1
NW_018037665.1	genBlastG	coding_exon	104996	105369	.	-	.	ID=ENSLACP00000022980.1-R1-2-A1-E2;Parent=ENSLACP00000022980.1-R1-2-A1
NW_018063509.1	genBlastG	transcript	72168	76025	159.8	-	.	ID=ENSLACP00000003722.1-R1-1-A1;Name=ENSLACP00000003722.1;PID=37.27;Coverage=78.02;Note=PID:37.27-Cover:78.02
NW_018063509.1	genBlastG	coding_exon	75984	76025	.	-	.	ID=ENSLACP00000003722.1-R1-1-A1-E1;Parent=ENSLACP00000003722.1-R1-1-A1
NW_018063509.1	genBlastG	coding_exon	75507	75633	.	-	.	ID=ENSLACP00000003722.1-R1-1-A1-E2;Parent=ENSLACP00000003722.1-R1-1-A1
NW_018063509.1	genBlastG	coding_exon	75408	75479	.	-	.	ID=ENSLACP00000003722.1-R1-1-A1-E3;Parent=ENSLACP00000003722.1-R1-1-A1
NW_018063509.1	genBlastG	coding_exon	75268	75347	.	-	.	ID=ENSLACP00000003722.1-R1-1-A1-E4;Parent=ENSLACP00000003722.1-R1-1-A1
NW_018063509.1	genBlastG	coding_exon	74431	75249	.	-	.	ID=ENSLACP00000003722.1-R1-1-A1-E5;Parent=ENSLACP00000003722.1-R1-1-A1
NW_018063509.1	genBlastG	coding_exon	74045	74353	.	-	.	ID=ENSLACP00000003722.1-R1-1-A1-E6;Parent=ENSLACP00000003722.1-R1-1-A1
NW_018063509.1	genBlastG	coding_exon	73711	73828	.	-	.	ID=ENSLACP00000003722.1-R1-1-A1-E7;Parent=ENSLACP00000003722.1-R1-1-A1
NW_018063509.1	genBlastG	coding_exon	73628	73695	.	-	.	ID=ENSLACP00000003722.1-R1-1-A1-E8;Parent=ENSLACP00000003722.1-R1-1-A1
NW_018063509.1	genBlastG	coding_exon	73252	73564	.	-	.	ID=ENSLACP00000003722.1-R1-1-A1-E9;Parent=ENSLACP00000003722.1-R1-1-A1
NW_018063509.1	genBlastG	coding_exon	73184	73239	.	-	.	ID=ENSLACP00000003722.1-R1-1-A1-E10;Parent=ENSLACP00000003722.1-R1-1-A1
NW_018063509.1	genBlastG	coding_exon	73030	73162	.	-	.	ID=ENSLACP00000003722.1-R1-1-A1-E11;Parent=ENSLACP00000003722.1-R1-1-A1
NW_018063509.1	genBlastG	coding_exon	72816	73008	.	-	.	ID=ENSLACP00000003722.1-R1-1-A1-E12;Parent=ENSLACP00000003722.1-R1-1-A1
NW_018063509.1	genBlastG	coding_exon	72752	72771	.	-	.	ID=ENSLACP00000003722.1-R1-1-A1-E13;Parent=ENSLACP00000003722.1-R1-1-A1
NW_018063509.1	genBlastG	coding_exon	72535	72633	.	-	.	ID=ENSLACP00000003722.1-R1-1-A1-E14;Parent=ENSLACP00000003722.1-R1-1-A1
NW_018063509.1	genBlastG	coding_exon	72168	72181	.	-	.	ID=ENSLACP00000003722.1-R1-1-A1-E15;Parent=ENSLACP00000003722.1-R1-1-A1
NW_018028931.1	genBlastG	transcript	121572	122960	42.36	+	.	ID=ENSLACP00000003767.1-R1-1-A1;Name=ENSLACP00000003767.1;PID=33.16;Coverage=100;Note=PID:33.16-Cover:100
NW_018028931.1	genBlastG	coding_exon	121572	121587	.	+	.	ID=ENSLACP00000003767.1-R1-1-A1-E1;Parent=ENSLACP00000003767.1-R1-1-A1
NW_018028931.1	genBlastG	coding_exon	121608	121710	.	+	.	ID=ENSLACP00000003767.1-R1-1-A1-E2;Parent=ENSLACP00000003767.1-R1-1-A1
NW_018028931.1	genBlastG	coding_exon	121756	122187	.	+	.	ID=ENSLACP00000003767.1-R1-1-A1-E3;Parent=ENSLACP00000003767.1-R1-1-A1
NW_018028931.1	genBlastG	coding_exon	122492	122960	.	+	.	ID=ENSLACP00000003767.1-R1-1-A1-E4;Parent=ENSLACP00000003767.1-R1-1-A1
NW_018040435.1	genBlastG	transcript	28273	29487	45.49	-	.	ID=ENSLACP00000003802.1-R1-1-A1;Name=ENSLACP00000003802.1;PID=30.47;Coverage=91.64;Note=PID:30.47-Cover:91.64
NW_018040435.1	genBlastG	coding_exon	29410	29487	.	-	.	ID=ENSLACP00000003802.1-R1-1-A1-E1;Parent=ENSLACP00000003802.1-R1-1-A1
NW_018040435.1	genBlastG	coding_exon	29253	29352	.	-	.	ID=ENSLACP00000003802.1-R1-1-A1-E2;Parent=ENSLACP00000003802.1-R1-1-A1
NW_018040435.1	genBlastG	coding_exon	28931	29222	.	-	.	ID=ENSLACP00000003802.1-R1-1-A1-E3;Parent=ENSLACP00000003802.1-R1-1-A1
NW_018040435.1	genBlastG	coding_exon	28739	28825	.	-	.	ID=ENSLACP00000003802.1-R1-1-A1-E4;Parent=ENSLACP00000003802.1-R1-1-A1
NW_018040435.1	genBlastG	coding_exon	28668	28687	.	-	.	ID=ENSLACP00000003802.1-R1-1-A1-E5;Parent=ENSLACP00000003802.1-R1-1-A1
NW_018040435.1	genBlastG	coding_exon	28273	28652	.	-	.	ID=ENSLACP00000003802.1-R1-1-A1-E6;Parent=ENSLACP00000003802.1-R1-1-A1
NW_018063265.1	genBlastG	transcript	5976	7629	28.65	-	.	ID=ENSLACP00000003868.1-R1-1-A1;Name=ENSLACP00000003868.1;PID=30.41;Coverage=76.37;Note=PID:30.41-Cover:76.37
NW_018063265.1	genBlastG	coding_exon	7588	7629	.	-	.	ID=ENSLACP00000003868.1-R1-1-A1-E1;Parent=ENSLACP00000003868.1-R1-1-A1
NW_018063265.1	genBlastG	coding_exon	5976	6857	.	-	.	ID=ENSLACP00000003868.1-R1-1-A1-E2;Parent=ENSLACP00000003868.1-R1-1-A1
NW_018039416.1	genBlastG	transcript	4707	7378	51.87	-	.	ID=ENSLACP00000003999.1-R1-1-A1;Name=ENSLACP00000003999.1;PID=43.43;Coverage=100;Note=PID:43.43-Cover:100
NW_018039416.1	genBlastG	coding_exon	6746	7378	.	-	.	ID=ENSLACP00000003999.1-R1-1-A1-E1;Parent=ENSLACP00000003999.1-R1-1-A1
NW_018039416.1	genBlastG	coding_exon	4707	4904	.	-	.	ID=ENSLACP00000003999.1-R1-1-A1-E2;Parent=ENSLACP00000003999.1-R1-1-A1
NW_018077653.1	genBlastG	transcript	27781	32740	102.6	+	.	ID=ENSLACP00000004071.1-R1-1-A1;Name=ENSLACP00000004071.1;PID=33.55;Coverage=97.97;Note=PID:33.55-Cover:97.97
NW_018077653.1	genBlastG	coding_exon	27781	27887	.	+	.	ID=ENSLACP00000004071.1-R1-1-A1-E1;Parent=ENSLACP00000004071.1-R1-1-A1
NW_018077653.1	genBlastG	coding_exon	28763	28792	.	+	.	ID=ENSLACP00000004071.1-R1-1-A1-E2;Parent=ENSLACP00000004071.1-R1-1-A1
NW_018077653.1	genBlastG	coding_exon	28856	29022	.	+	.	ID=ENSLACP00000004071.1-R1-1-A1-E3;Parent=ENSLACP00000004071.1-R1-1-A1
NW_018077653.1	genBlastG	coding_exon	29534	29793	.	+	.	ID=ENSLACP00000004071.1-R1-1-A1-E4;Parent=ENSLACP00000004071.1-R1-1-A1
NW_018077653.1	genBlastG	coding_exon	30555	30887	.	+	.	ID=ENSLACP00000004071.1-R1-1-A1-E5;Parent=ENSLACP00000004071.1-R1-1-A1
NW_018077653.1	genBlastG	coding_exon	30916	31056	.	+	.	ID=ENSLACP00000004071.1-R1-1-A1-E6;Parent=ENSLACP00000004071.1-R1-1-A1
NW_018077653.1	genBlastG	coding_exon	31070	31235	.	+	.	ID=ENSLACP00000004071.1-R1-1-A1-E7;Parent=ENSLACP00000004071.1-R1-1-A1
NW_018077653.1	genBlastG	coding_exon	31252	31379	.	+	.	ID=ENSLACP00000004071.1-R1-1-A1-E8;Parent=ENSLACP00000004071.1-R1-1-A1
NW_018077653.1	genBlastG	coding_exon	31443	31504	.	+	.	ID=ENSLACP00000004071.1-R1-1-A1-E9;Parent=ENSLACP00000004071.1-R1-1-A1
NW_018077653.1	genBlastG	coding_exon	31616	31664	.	+	.	ID=ENSLACP00000004071.1-R1-1-A1-E10;Parent=ENSLACP00000004071.1-R1-1-A1
NW_018077653.1	genBlastG	coding_exon	31705	32247	.	+	.	ID=ENSLACP00000004071.1-R1-1-A1-E11;Parent=ENSLACP00000004071.1-R1-1-A1
NW_018077653.1	genBlastG	coding_exon	32264	32740	.	+	.	ID=ENSLACP00000004071.1-R1-1-A1-E12;Parent=ENSLACP00000004071.1-R1-1-A1
NW_018040468.1	genBlastG	transcript	28080	28730	13.16	+	.	ID=ENSLACP00000004073.1-R1-1-A1;Name=ENSLACP00000004073.1;PID=25.46;Coverage=56.28;Note=PID:25.46-Cover:56.28
NW_018040468.1	genBlastG	coding_exon	28080	28162	.	+	.	ID=ENSLACP00000004073.1-R1-1-A1-E1;Parent=ENSLACP00000004073.1-R1-1-A1
NW_018040468.1	genBlastG	coding_exon	28230	28466	.	+	.	ID=ENSLACP00000004073.1-R1-1-A1-E2;Parent=ENSLACP00000004073.1-R1-1-A1
NW_018040468.1	genBlastG	coding_exon	28631	28730	.	+	.	ID=ENSLACP00000004073.1-R1-1-A1-E3;Parent=ENSLACP00000004073.1-R1-1-A1
NW_018058283.1	genBlastG	transcript	77982	80063	52.84	+	.	ID=ENSLACP00000004103.1-R1-1-A1;Name=ENSLACP00000004103.1;PID=30.11;Coverage=99.41;Note=PID:30.11-Cover:99.41
NW_018058283.1	genBlastG	coding_exon	77982	78518	.	+	.	ID=ENSLACP00000004103.1-R1-1-A1-E1;Parent=ENSLACP00000004103.1-R1-1-A1
NW_018058283.1	genBlastG	coding_exon	78531	78727	.	+	.	ID=ENSLACP00000004103.1-R1-1-A1-E2;Parent=ENSLACP00000004103.1-R1-1-A1
NW_018058283.1	genBlastG	coding_exon	78767	80063	.	+	.	ID=ENSLACP00000004103.1-R1-1-A1-E3;Parent=ENSLACP00000004103.1-R1-1-A1
NW_018028963.1	genBlastG	transcript	33961	34646	57.75	+	.	ID=ENSLACP00000004220.1-R1-1-A1;Name=ENSLACP00000004220.1;PID=42.64;Coverage=78.01;Note=PID:42.64-Cover:78.01
NW_018028963.1	genBlastG	coding_exon	33961	34041	.	+	.	ID=ENSLACP00000004220.1-R1-1-A1-E1;Parent=ENSLACP00000004220.1-R1-1-A1
NW_018028963.1	genBlastG	coding_exon	34070	34214	.	+	.	ID=ENSLACP00000004220.1-R1-1-A1-E2;Parent=ENSLACP00000004220.1-R1-1-A1
NW_018028963.1	genBlastG	coding_exon	34266	34322	.	+	.	ID=ENSLACP00000004220.1-R1-1-A1-E3;Parent=ENSLACP00000004220.1-R1-1-A1
NW_018028963.1	genBlastG	coding_exon	34363	34646	.	+	.	ID=ENSLACP00000004220.1-R1-1-A1-E4;Parent=ENSLACP00000004220.1-R1-1-A1
NW_018032799.1	genBlastG	transcript	32136	33041	223.3	-	.	ID=ENSLACP00000004307.1-R1-1-A1;Name=ENSLACP00000004307.1;PID=24.25;Coverage=100;Note=PID:24.25-Cover:100
NW_018032799.1	genBlastG	coding_exon	32136	33041	.	-	.	ID=ENSLACP00000004307.1-R1-1-A1-E1;Parent=ENSLACP00000004307.1-R1-1-A1
NW_018038728.1	genBlastG	transcript	109841	111621	72.26	-	.	ID=ENSLACP00000004319.1-R1-1-A1;Name=ENSLACP00000004319.1;PID=29.17;Coverage=76.14;Note=PID:29.17-Cover:76.14
NW_018038728.1	genBlastG	coding_exon	111557	111621	.	-	.	ID=ENSLACP00000004319.1-R1-1-A1-E1;Parent=ENSLACP00000004319.1-R1-1-A1
NW_018038728.1	genBlastG	coding_exon	111469	111490	.	-	.	ID=ENSLACP00000004319.1-R1-1-A1-E2;Parent=ENSLACP00000004319.1-R1-1-A1
NW_018038728.1	genBlastG	coding_exon	111245	111310	.	-	.	ID=ENSLACP00000004319.1-R1-1-A1-E3;Parent=ENSLACP00000004319.1-R1-1-A1
NW_018038728.1	genBlastG	coding_exon	110834	111231	.	-	.	ID=ENSLACP00000004319.1-R1-1-A1-E4;Parent=ENSLACP00000004319.1-R1-1-A1
NW_018038728.1	genBlastG	coding_exon	110488	110822	.	-	.	ID=ENSLACP00000004319.1-R1-1-A1-E5;Parent=ENSLACP00000004319.1-R1-1-A1
NW_018038728.1	genBlastG	coding_exon	110414	110454	.	-	.	ID=ENSLACP00000004319.1-R1-1-A1-E6;Parent=ENSLACP00000004319.1-R1-1-A1
NW_018038728.1	genBlastG	coding_exon	110336	110355	.	-	.	ID=ENSLACP00000004319.1-R1-1-A1-E7;Parent=ENSLACP00000004319.1-R1-1-A1
NW_018038728.1	genBlastG	coding_exon	109841	110294	.	-	.	ID=ENSLACP00000004319.1-R1-1-A1-E8;Parent=ENSLACP00000004319.1-R1-1-A1
NW_018028799.1	genBlastG	transcript	188287	189162	29.11	-	.	ID=ENSLACP00000004494.1-R1-1-A1;Name=ENSLACP00000004494.1;PID=26.05;Coverage=61.41;Note=PID:26.05-Cover:61.41
NW_018028799.1	genBlastG	coding_exon	189040	189162	.	-	.	ID=ENSLACP00000004494.1-R1-1-A1-E1;Parent=ENSLACP00000004494.1-R1-1-A1
NW_018028799.1	genBlastG	coding_exon	188922	189027	.	-	.	ID=ENSLACP00000004494.1-R1-1-A1-E2;Parent=ENSLACP00000004494.1-R1-1-A1
NW_018028799.1	genBlastG	coding_exon	188688	188744	.	-	.	ID=ENSLACP00000004494.1-R1-1-A1-E3;Parent=ENSLACP00000004494.1-R1-1-A1
NW_018028799.1	genBlastG	coding_exon	188568	188639	.	-	.	ID=ENSLACP00000004494.1-R1-1-A1-E4;Parent=ENSLACP00000004494.1-R1-1-A1
NW_018028799.1	genBlastG	coding_exon	188501	188522	.	-	.	ID=ENSLACP00000004494.1-R1-1-A1-E5;Parent=ENSLACP00000004494.1-R1-1-A1
NW_018028799.1	genBlastG	coding_exon	188287	188482	.	-	.	ID=ENSLACP00000004494.1-R1-1-A1-E6;Parent=ENSLACP00000004494.1-R1-1-A1
NW_018081123.1	genBlastG	transcript	43910	46373	76.26	-	.	ID=ENSLACP00000004557.1-R1-1-A1;Name=ENSLACP00000004557.1;PID=30.61;Coverage=89.59;Note=PID:30.61-Cover:89.59
NW_018081123.1	genBlastG	coding_exon	46328	46373	.	-	.	ID=ENSLACP00000004557.1-R1-1-A1-E1;Parent=ENSLACP00000004557.1-R1-1-A1
[truncated: 2,017 more rows]
