# Supplementary material for: The whale shark genome reveals patterns of vertebrate gene family evolution
Source: eLife. 2021 Aug 19;10:e65394. doi: 10.7554/eLife.65394 (PMC8455134; doi:10.7554/eLife.65394)
Supplement: Supplementary file 17. [file elife-65394-supp17.xlsx]

## Sheet: Sheet1
Species sampled for TLRs in Wang et al 2016
Number of TLRs	Species		Clade		Legend
2	Lethenteron	camtschaticum	Cyclostomata		Species included in our analysis
10	Petromyzon	marinus	Cyclostomata		Species not included in our analysis
1	Chiloscyllium	griseum	Chondrichthyes
11	Callorhinchus	milii	Chondrichthyes
14	Lepisosteus	oculatus	Actinopterygii
1	Plecoglossus	altivelis	Euteleosteomorpha
1	Acanthopagrus	berda	Euteleosteomorpha
1	Acanthopagrus	schlegelii	Euteleosteomorpha
1	Cynoglossus	semilaevis	Euteleosteomorpha
1	Dentex	tumifrons	Euteleosteomorpha
1	Dicentrarchus	labrax	Euteleosteomorpha
1	Miichthys	miiuy	Euteleosteomorpha
1	Pagrus	major	Euteleosteomorpha
1	Scophthalmus	maximus	Euteleosteomorpha
1	Siniperca	chuatsi	Euteleosteomorpha
2	Chionodraco	hamatus	Euteleosteomorpha
2	Oplegnathus	fasciatus	Euteleosteomorpha
2	Trematomus	bernacchii	Euteleosteomorpha
3	Sparus	aurata	Euteleosteomorpha
6	Epinephelus	coioides	Euteleosteomorpha
6	Larimichthys	crocea	Euteleosteomorpha
9	Paralichthys	olivaceus	Euteleosteomorpha
9	Tetraodon	nigroviridis	Euteleosteomorpha
10	Maylandia	zebra	Euteleosteomorpha
11	Gasterosteus	aculeatus	Euteleosteomorpha
11	Haplochromis	burtoni	Euteleosteomorpha
11	Neolamprologus	brichardi	Euteleosteomorpha
11	Oncorhynchus	mykiss	Euteleosteomorpha
11	Oreochromis	niloticus	Euteleosteomorpha
11	Oryzias	latipes	Euteleosteomorpha
12	Pundamilia	nyererei	Euteleosteomorpha
12	Takifugu	rubripes	Euteleosteomorpha
13	Poecilia	formosa	Euteleosteomorpha
16	Salmo	salar	Euteleosteomorpha
16	Xiphophorus	maculatus	Euteleosteomorpha
22	Gadus	morhua	Euteleosteomorpha
1	Catla	catla	Otomorpha
1	Clarias	batrachus	Otomorpha
1	Gobiocypris	rarus	Otomorpha
1	Megalobrama	amblycephala	Otomorpha
1	Schizothorax	richardsonii	Otomorpha
2	Carassius	gibelio	Otomorpha
2	Cirrhinus	mrigala	Otomorpha
2	Labeo	rohita	Otomorpha
3	Carassius	auratus	Otomorpha
3	Carassius	carassius	Otomorpha
7	Cyprinus	carpio	Otomorpha
9	Ctenopharyngodon	idella	Otomorpha
17	Astyanax	mexicanus	Otomorpha
18	Ictalurus	punctatus	Otomorpha
20	Danio	rerio	Otomorpha
15	Latimeria	chalumnae	Coelacanthimorpha
2	Xenopus	laevis	Amphibia
5	Andrias	davidianus	Amphibia
20	Xenopus	tropicalis	Amphibia
1	Cairina	moschata	Aves
1	Coturnix	coturnix	Aves
1	Coturnix	japonica	Aves
1	Gyps	fulvus	Aves
1	Numida	meleagris	Aves
1	Phasianus	colchicus	Aves
1	Tadorna	tadorna	Aves
2	Anser	cygnoides	Aves
3	Perdix	perdix	Aves
4	Anser	anser	Aves
5	Gallus	varius	Aves
7	Gallus	lafayetii	Aves
7	Gallus	sonneratii	Aves
7	Melopsittacus	undulatus	Aves
8	Columba	livia	Aves
8	Zonotrichia	albicollis	Aves
9	Anas	platyrhynchos	Aves
9	Falco	cherrug	Aves
9	Geospiza	fortis	Aves
9	Taeniopygia	guttata	Aves
10	Falco	peregrinus	Aves
10	Ficedula	albicollis	Aves
10	Gallus	gallus	Aves
10	Meleagris	gallopavo	Aves
10	Pseudopodoces	humilis	Aves
1	Crotalus	adamanteus	Reptiles
11	Chelonia	mydas	Reptiles
11	Python	bivittatus	Reptiles
13	Anolis	carolinensis	Reptiles
14	Alligator	mississippiensis	Reptiles
14	Alligator	sinensis	Reptiles
14	Pelodiscus	sinensis	Reptiles
15	Chrysemys	picta	Reptiles
9	Ornithorhynchus	anatinus	Prototheria
3	Macropus	eugenii	Metatheria
7	Monodelphis	domestica	Metatheria
10	Sarcophilus	harrisii	Metatheria
2	Choloepus	hoffmanni	Xenarthra
11	Dasypus	novemcinctus	Xenarthra
1	Procavia	capensis	Afrotheria
6	Echinops	telfairi	Afrotheria
9	Elephantulus	edwardii	Afrotheria
10	Chrysochloris	asiatica	Afrotheria
11	Orycteropus	afer	Afrotheria
11	Trichechus	manatus	Afrotheria
12	Loxodonta	africana	Afrotheria
1	Damaliscus	pygargus	Laurasiatheria
1	Equus	burchellii	Laurasiatheria
1	Equus	zebra	Laurasiatheria
1	Equus	hemionus	Laurasiatheria
1	Antidorcas	marsupialis	Laurasiatheria
1	Balaenoptera	acutorostrata	Laurasiatheria
1	Balaenoptera	omurai	Laurasiatheria
1	Bison	bonasus	Laurasiatheria
1	Bos	javanicus	Laurasiatheria
1	Camelus	bactrianus	Laurasiatheria
1	Capra	ibex	Laurasiatheria
1	Delphinapterus	leucas	Laurasiatheria
1	Delphinus	capensis	Laurasiatheria
1	Equus	asinus	Laurasiatheria
1	Equus	grevyi	Laurasiatheria
1	Equus	kiang	Laurasiatheria
1	Lagenorhynchus	obliquidens	Laurasiatheria
1	Neophocaena	phocaenoides	Laurasiatheria
1	Odocoileus	hemionus	Laurasiatheria
1	Odocoileus	virginianus	Laurasiatheria
1	Oryx	dammah	Laurasiatheria
1	Oryx	gazella	Laurasiatheria
1	Oryx	leucoryx	Laurasiatheria
1	Platanista	gangetica	Laurasiatheria
1	Rupicapra	rupicapra	Laurasiatheria
1	Sousa	chinensis	Laurasiatheria
1	Stenella	coeruleoalba	Laurasiatheria
1	Syncerus	caffer	Laurasiatheria
1	Tragelaphus	imberbis	Laurasiatheria
1	Tragelaphus	strepsiceros	Laurasiatheria
2	Giraffa	camelopardalis	Laurasiatheria
3	Bison	bison	Laurasiatheria
3	Bos	frontalis	Laurasiatheria
3	Rousettus	leschenaultii	Laurasiatheria
4	Boselaphus	tragocamelus	Laurasiatheria
4	Cervus	nippon	Laurasiatheria
5	Pteropus	vampyrus	Laurasiatheria
5	Sorex	araneus	Laurasiatheria
6	Vicugna	pacos	Laurasiatheria
7	Erinaceus	europaeus	Laurasiatheria
7	Pantholops	hodgsonii	Laurasiatheria
7	Tursiops	truncatus	Laurasiatheria
8	Panthera	tigris	Laurasiatheria
8	Bos	grunniens	Laurasiatheria
8	Felis	catus	Laurasiatheria
8	Leptonychotes	weddellii	Laurasiatheria
9	Bos	taurus	Laurasiatheria
9	Lipotes	vexillifer	Laurasiatheria
9	Odobenus	rosmarus	Laurasiatheria
9	Mustela	putorius	Laurasiatheria
10	Canis	lupus	Laurasiatheria
10	Balaenoptera	acutorostrata	Laurasiatheria
10	Ailuropoda	melanoleuca	Laurasiatheria
10	Bos	indicus	Laurasiatheria
10	Bos	mutus	Laurasiatheria
10	Bubalus	bubalis	Laurasiatheria
10	Camelus	ferus	Laurasiatheria
10	Capra	hircus	Laurasiatheria
10	Condylura	cristata	Laurasiatheria
10	Orcinus	orca	Laurasiatheria
10	Ovis	aries	Laurasiatheria
10	Physeter	catodon	Laurasiatheria
10	Pteropus	alecto	Laurasiatheria
10	Sus	scrofa	Laurasiatheria
11	Equus	caballus	Laurasiatheria
11	Myotis	lucifugus	Laurasiatheria
12	Eptesicus	fuscus	Laurasiatheria
12	Myotis	brandtii	Laurasiatheria
12	Myotis	davidii	Laurasiatheria
12	Ceratotherium	simum	Laurasiatheria
1	Apodemus	alpicola	Glires
1	Apodemus	flavicollis	Glires
1	Apodemus	sylvaticus	Glires
1	Arvicola	amphibius	Glires
1	Chionomys	nivalis	Glires
1	Microtus	arvalis	Glires
1	Microtus	oeconomus	Glires
1	Myodes	andersoni	Glires
1	Myodes	rex	Glires
1	Sigmodon	hispidus	Glires
5	Dipodomys	ordii	Glires
8	Ochotona	princeps	Glires
9	Cavia	porcellus	Glires
9	Heterocephalus	glaber	Glires
9	Jaculus	jaculus	Glires
9	Microtus	ochrogaster	Glires
10	Octodon	degus	Glires
10	Oryctolagus	cuniculus	Glires
11	Chinchilla	lanigera	Glires
11	Mesocricetus	auratus	Glires
11	Peromyscus	maniculatus	Glires
12	Cricetulus	griseus	Glires
12	Ictidomys	tridecemlineatus	Glires
12	Mus	musculus	Glires
12	Rattus	norvegicus	Glires
1	Tupaia	belangeri	Scandentia
12	Tupaia	chinensis	Scandentia
1	Aotus	nancymaae	Primates
1	Macaca	fuscata	Primates
1	Macaca	nemestrina	Primates
1	Macaca	thibetana	Primates
2	Saguinus	oedipus	Primates
5	Hylobates	lar	Primates
5	Microcebus	murinus	Primates
8	Cercocebus	atys	Primates
8	Pongo	abelii	Primates
8	Tarsius	syrichta	Primates
9	Nomascus	leucogenys	Primates
9	Otolemur	garnettii	Primates
9	Pan	troglodytes	Primates
10	Callithrix	jacchus	Primates
10	Chlorocebus	sabaeus	Primates
10	Homo	sapiens	Primates
10	Macaca	fascicularis	Primates
10	Macaca	mulatta	Primates
10	Pan	paniscus	Primates
10	Papio	anubis	Primates
10	Pongo	pygmaeus	Primates
10	Saimiri	boliviensis	Primates
11	Gorilla	gorilla	Primates
