# Supplementary material for: The whale shark genome reveals patterns of vertebrate gene family evolution
Source: eLife. 2021 Aug 19;10:e65394. doi: 10.7554/eLife.65394 (PMC8455134; doi:10.7554/eLife.65394)
Supplement: Supplementary file 18. — Discordant fossils were excluded from divergence time analysis. All age ranges are derived from Benton et al., 2014, except for the age of Chondricthyes, which were derived from Coates et al., 2017. [file elife-65394-supp18.xlsx]

## Sheet: Sheet1
Crown node name	Min Age (Ma)	Max Age (Ma)	Concordant?
Vertebrata (root node)	457.5	636.1	Y
Gnathostomata	420.7	468.4	Y
Chondrichthyes	358	422.4	Y
Osteichthyes	420.7	444.9	Y
Sarcopterygii	408	427.9	Y
Tetrapoda	337	351	Y
Amniota	318	332.9	Y
Mammalia	164.9	201.5	N
Theria	156.3	169.6	N
Placentalia	61.6	164.6	N
Artiodactyla	52.4	66	N
