# Supplementary material for: The whale shark genome reveals patterns of vertebrate gene family evolution
Source: eLife. 2021 Aug 19;10:e65394. doi: 10.7554/eLife.65394 (PMC8455134; doi:10.7554/eLife.65394)
Supplement: Supplementary file 21. [file elife-65394-supp21.xlsx]

## Sheet: Sheet1
	Number of elements	Length occupied (bp)	Percentage of sequence
SINEs:	238546	45540346	1.55
ALUs	0	0	0
MIRs	0	0	0
LINEs:	2198969	974884225	33.25
LINE1	0	0	0
LINE2	64356	18837437	0.64
L3/CR1	1421231	638508824	21.78
LTR elements:	346587	116780647	3.98
ERVL	1342	1253585	0.04
ERVL-MaLRs	0	0	0
ERV_classI	4050	2057150	0.07
Unclassified:	1463974	318205896	10.85
Total interspersed repeats:		1475831239	0.5034
small RNA:	3192	7876017	0.27
Satellites:	6333	2523637	0.09
Simple repeats:	177884	14474709	0.49
Low complexity:	36180	3453271	0.12
