# Supplementary figures and images for: The whale shark genome reveals patterns of vertebrate gene family evolution
Source: eLife journal article supplement (doi:10.7554/elife.65394), 2021-08-19

(A)

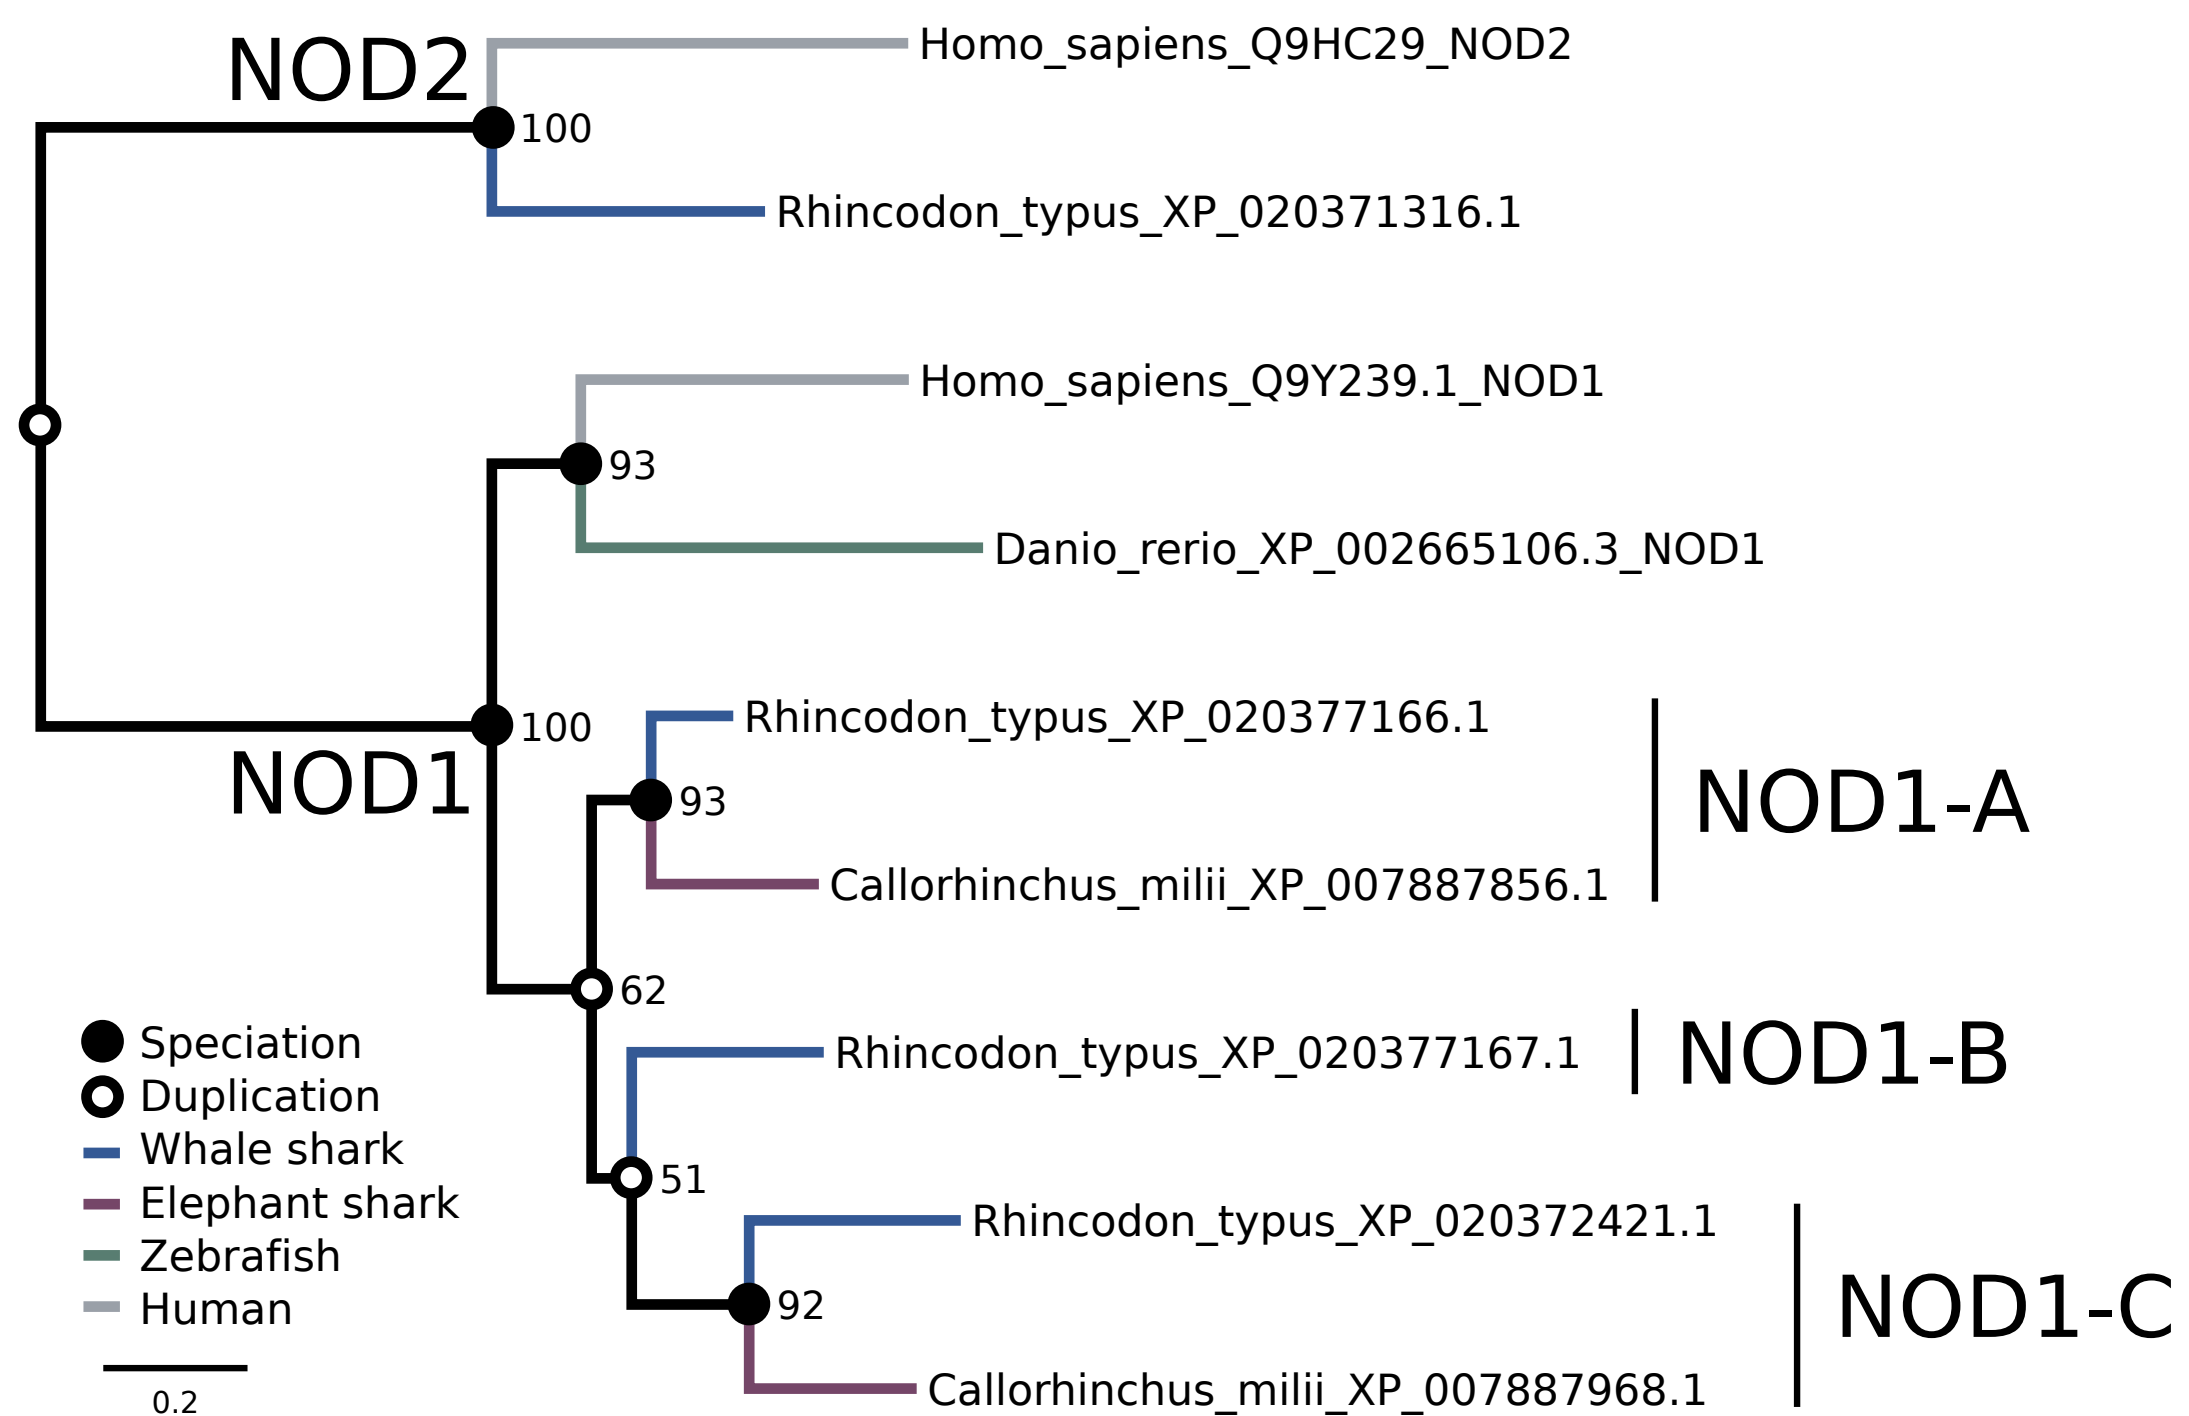

(B)

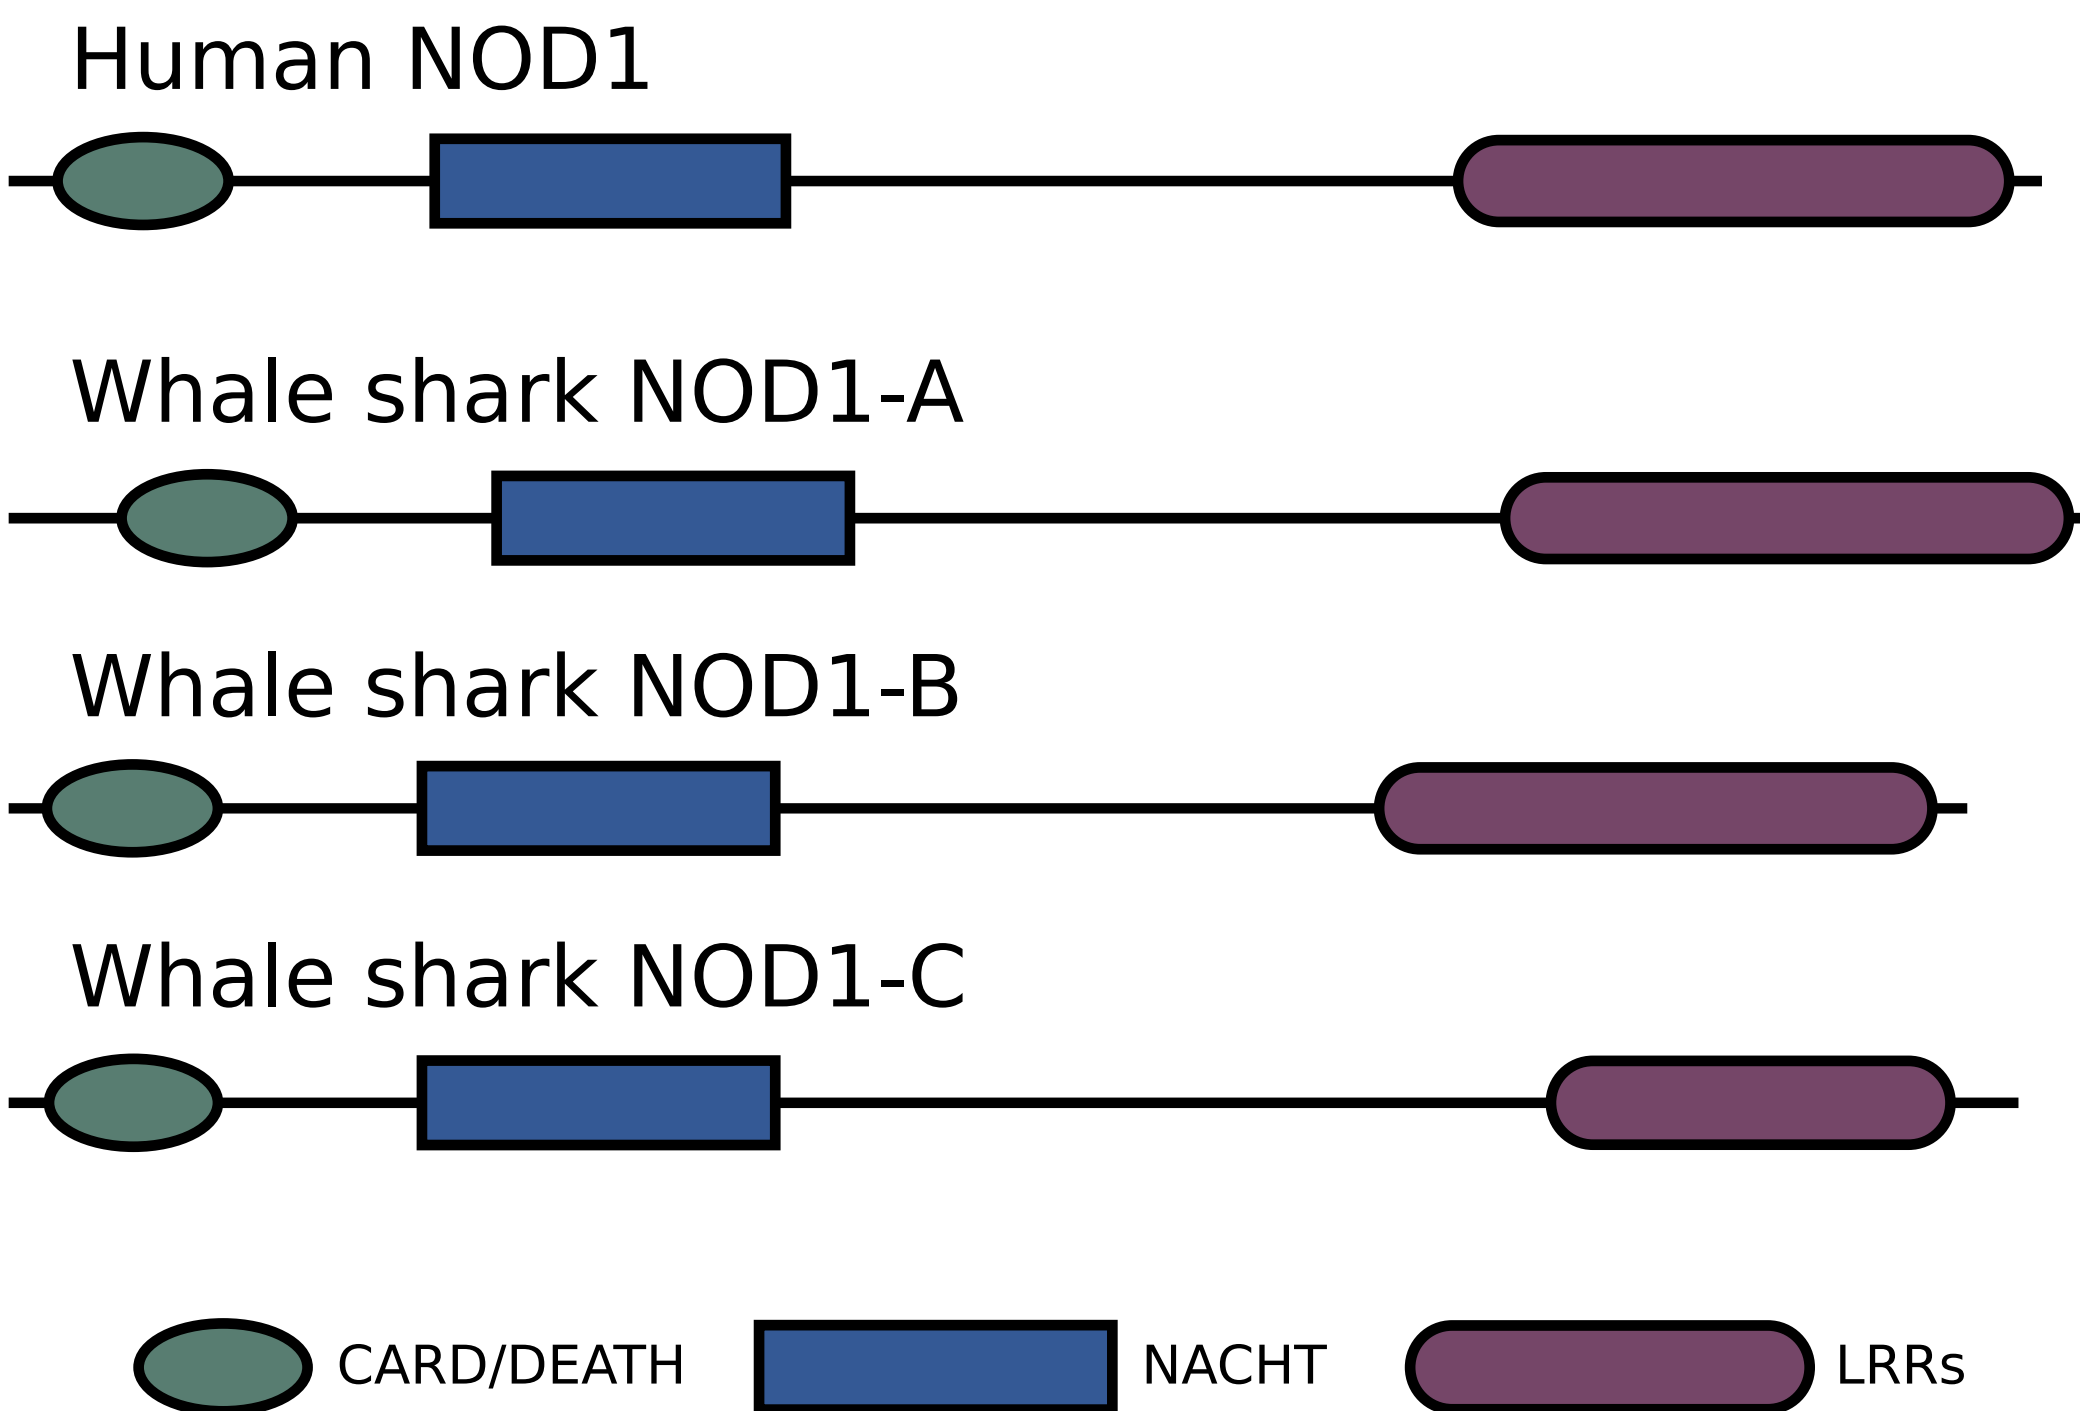

(C)

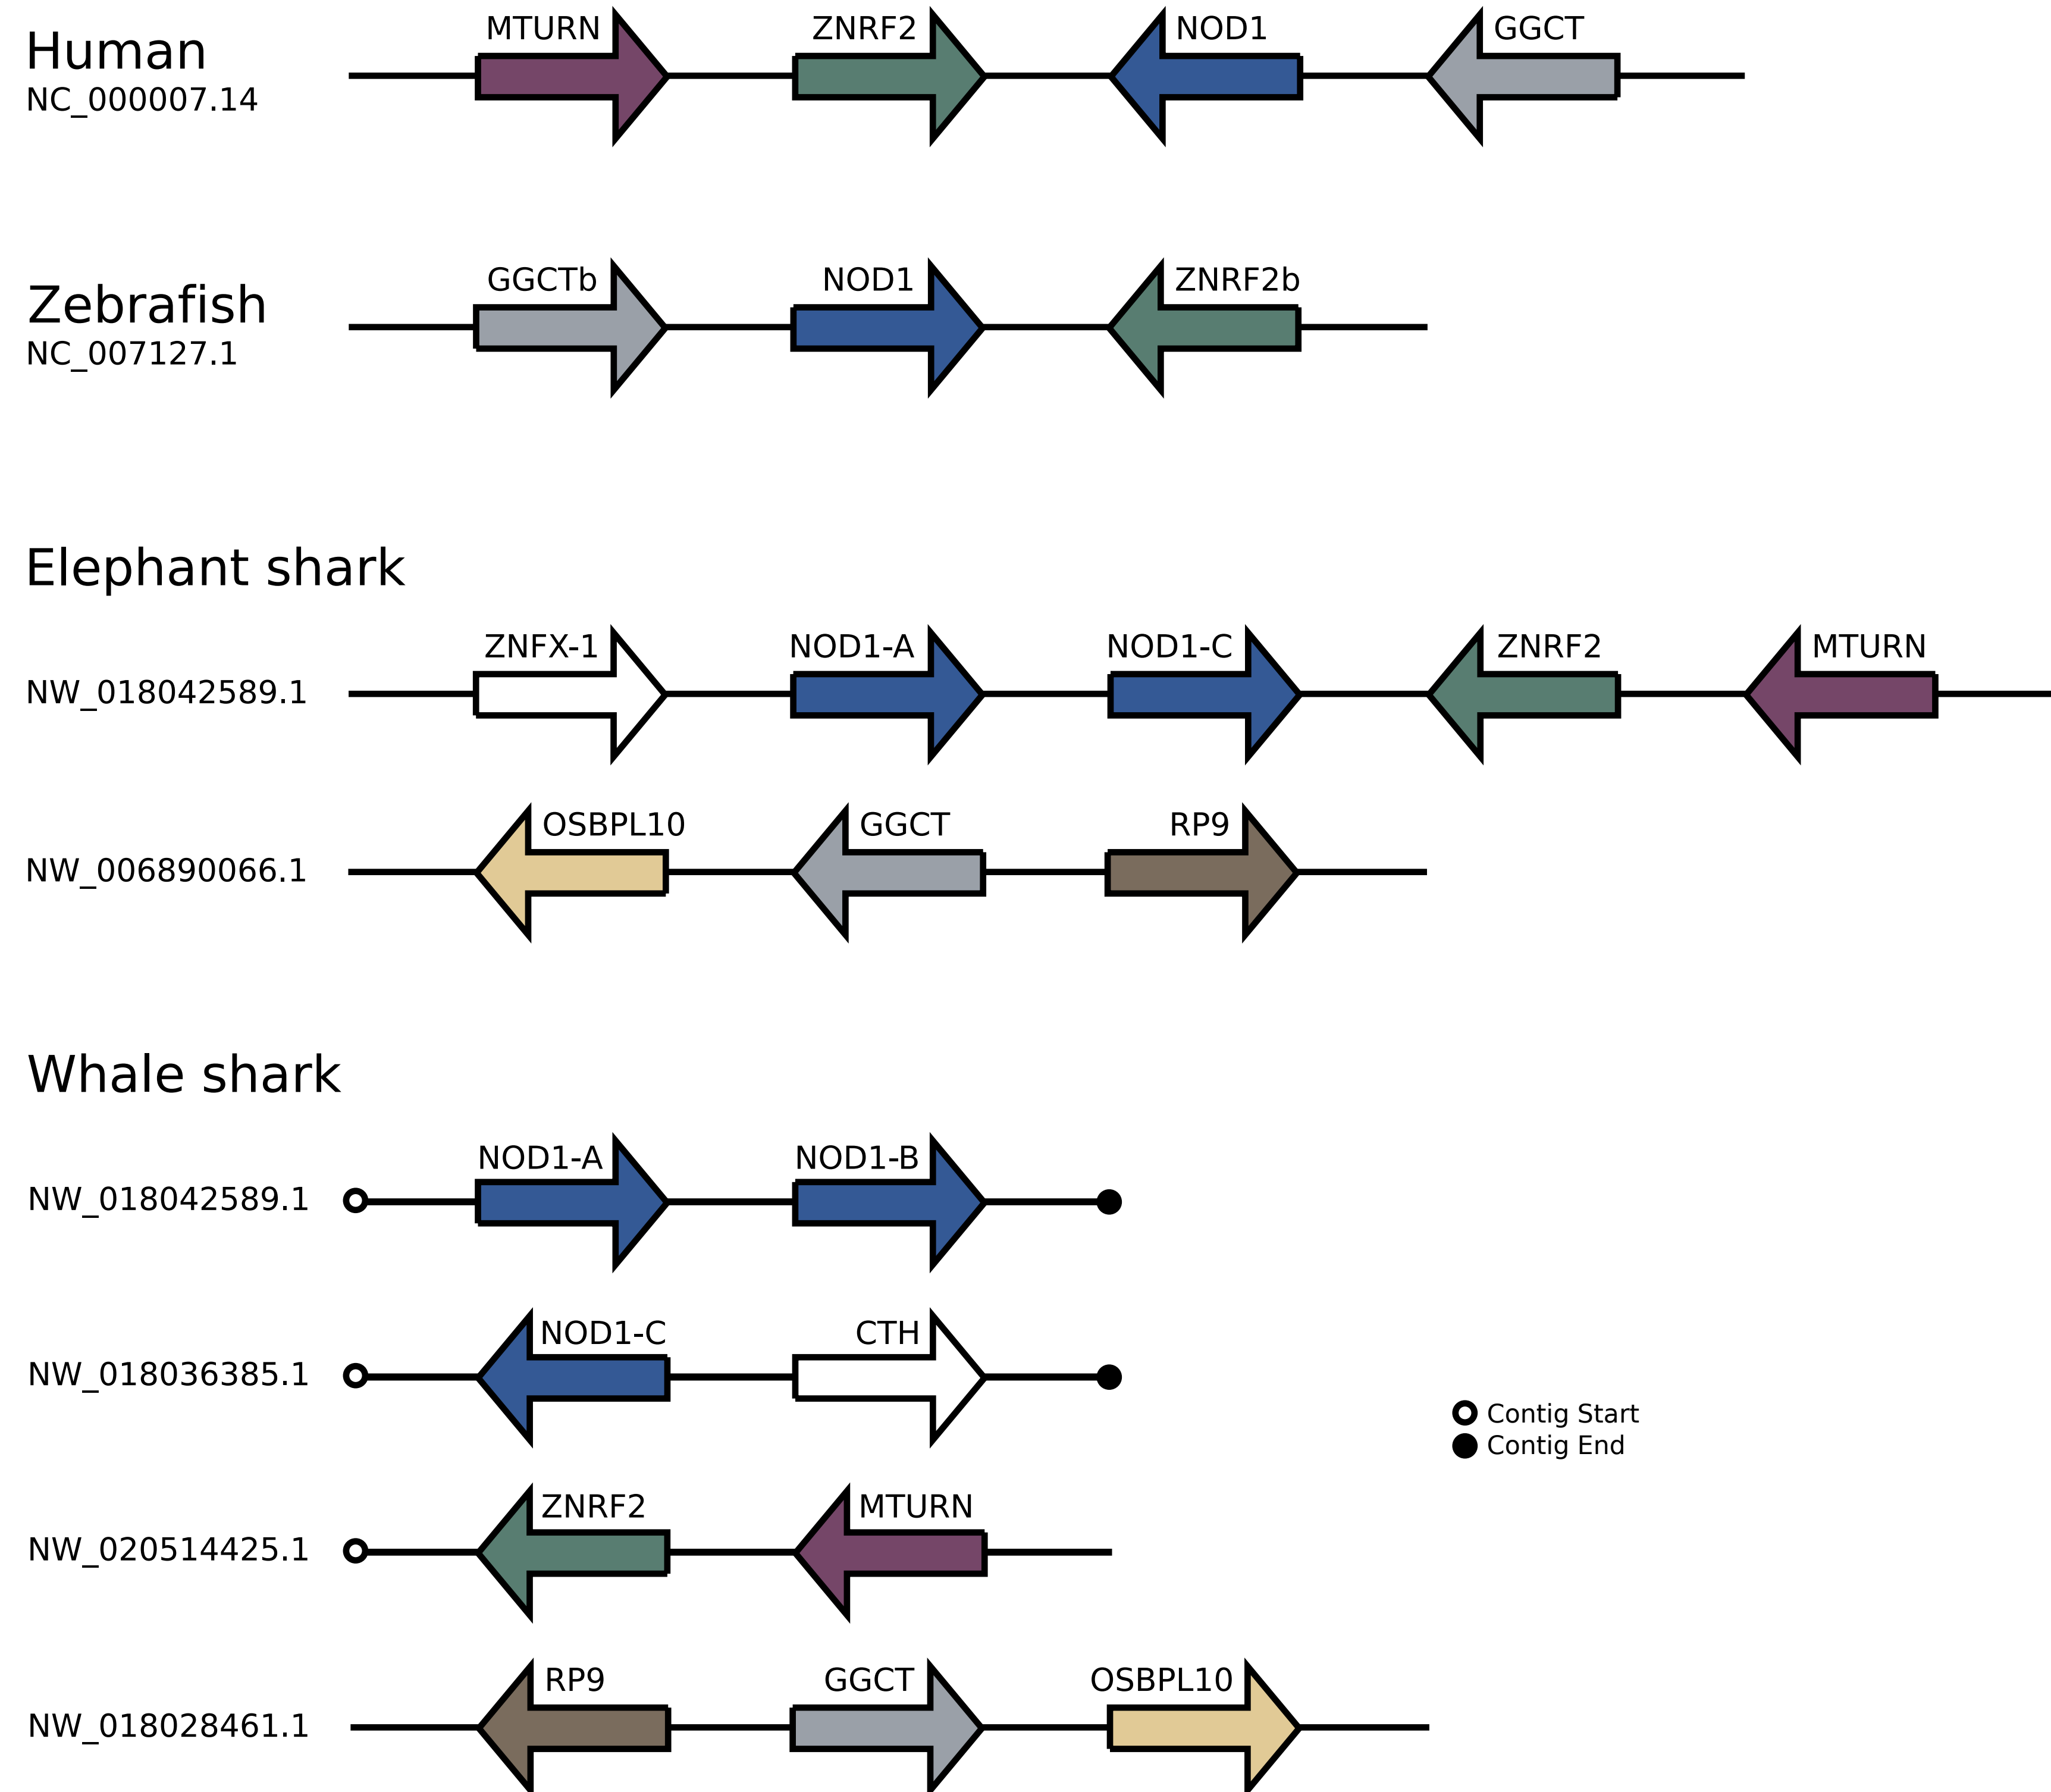

Supplement: supp [file elife-65394-supp-v1.zip]

A. RLR DEAD Helicase domain tree

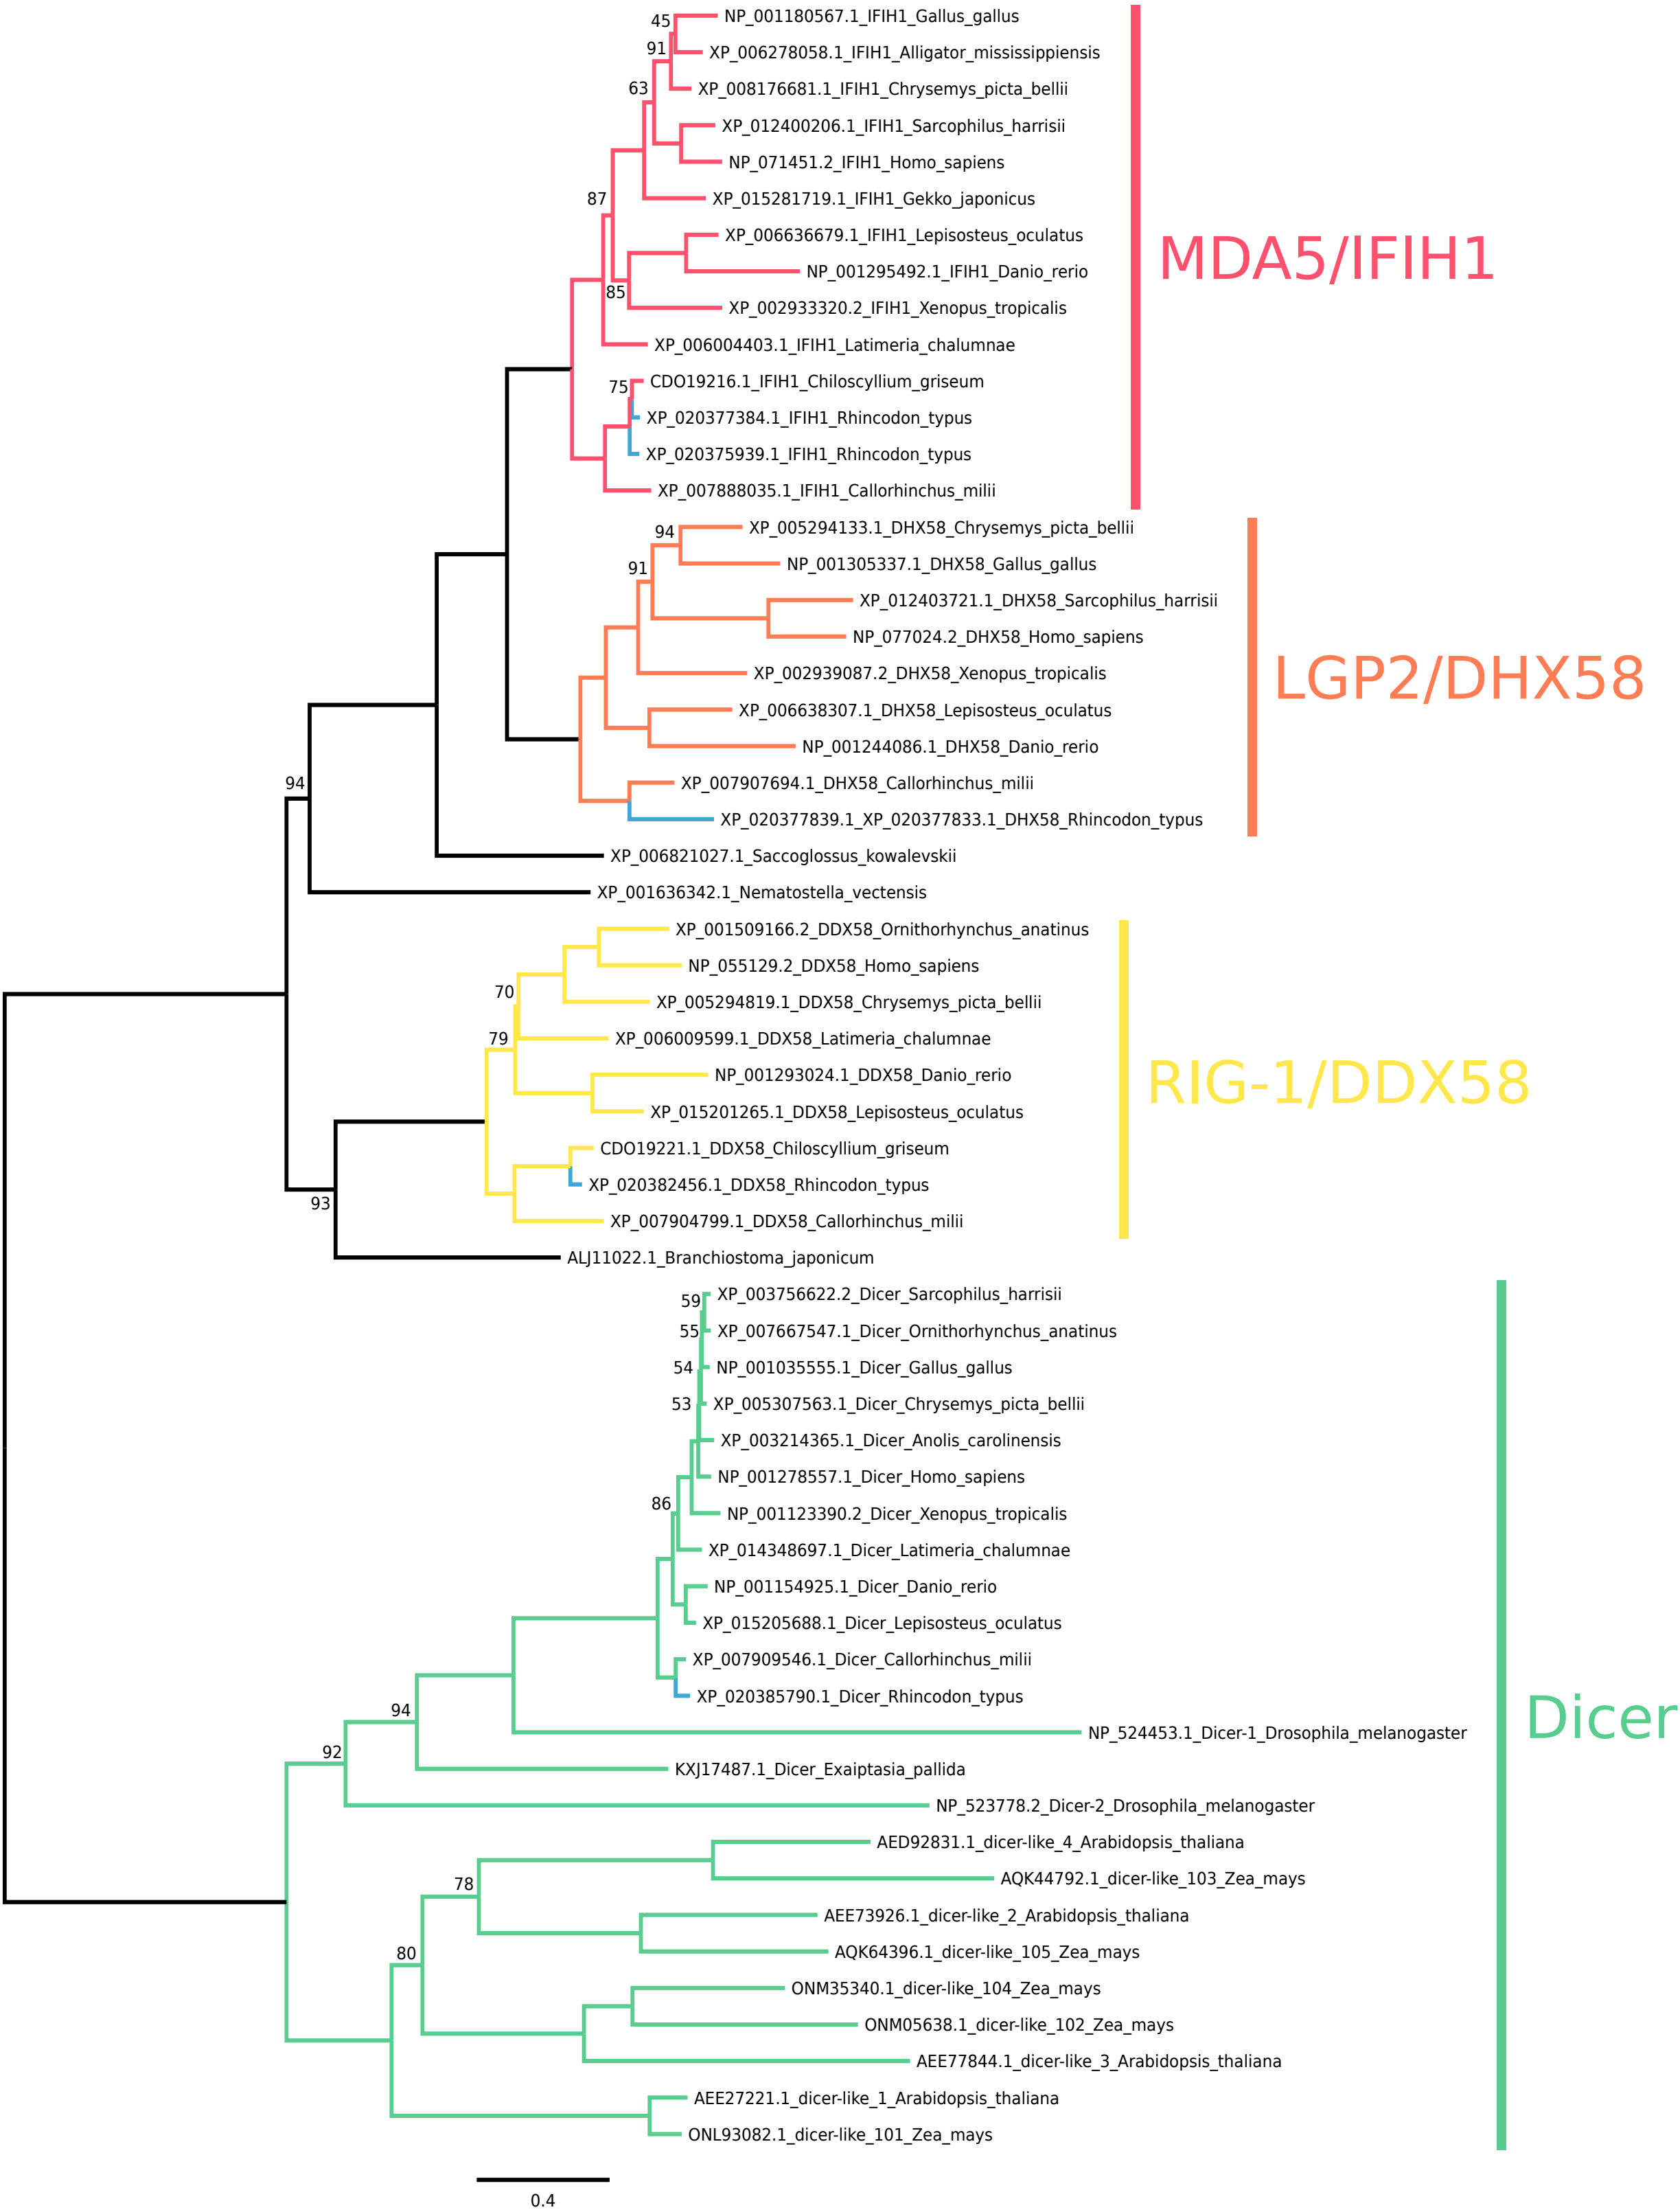

B. RLR CARD domain tree

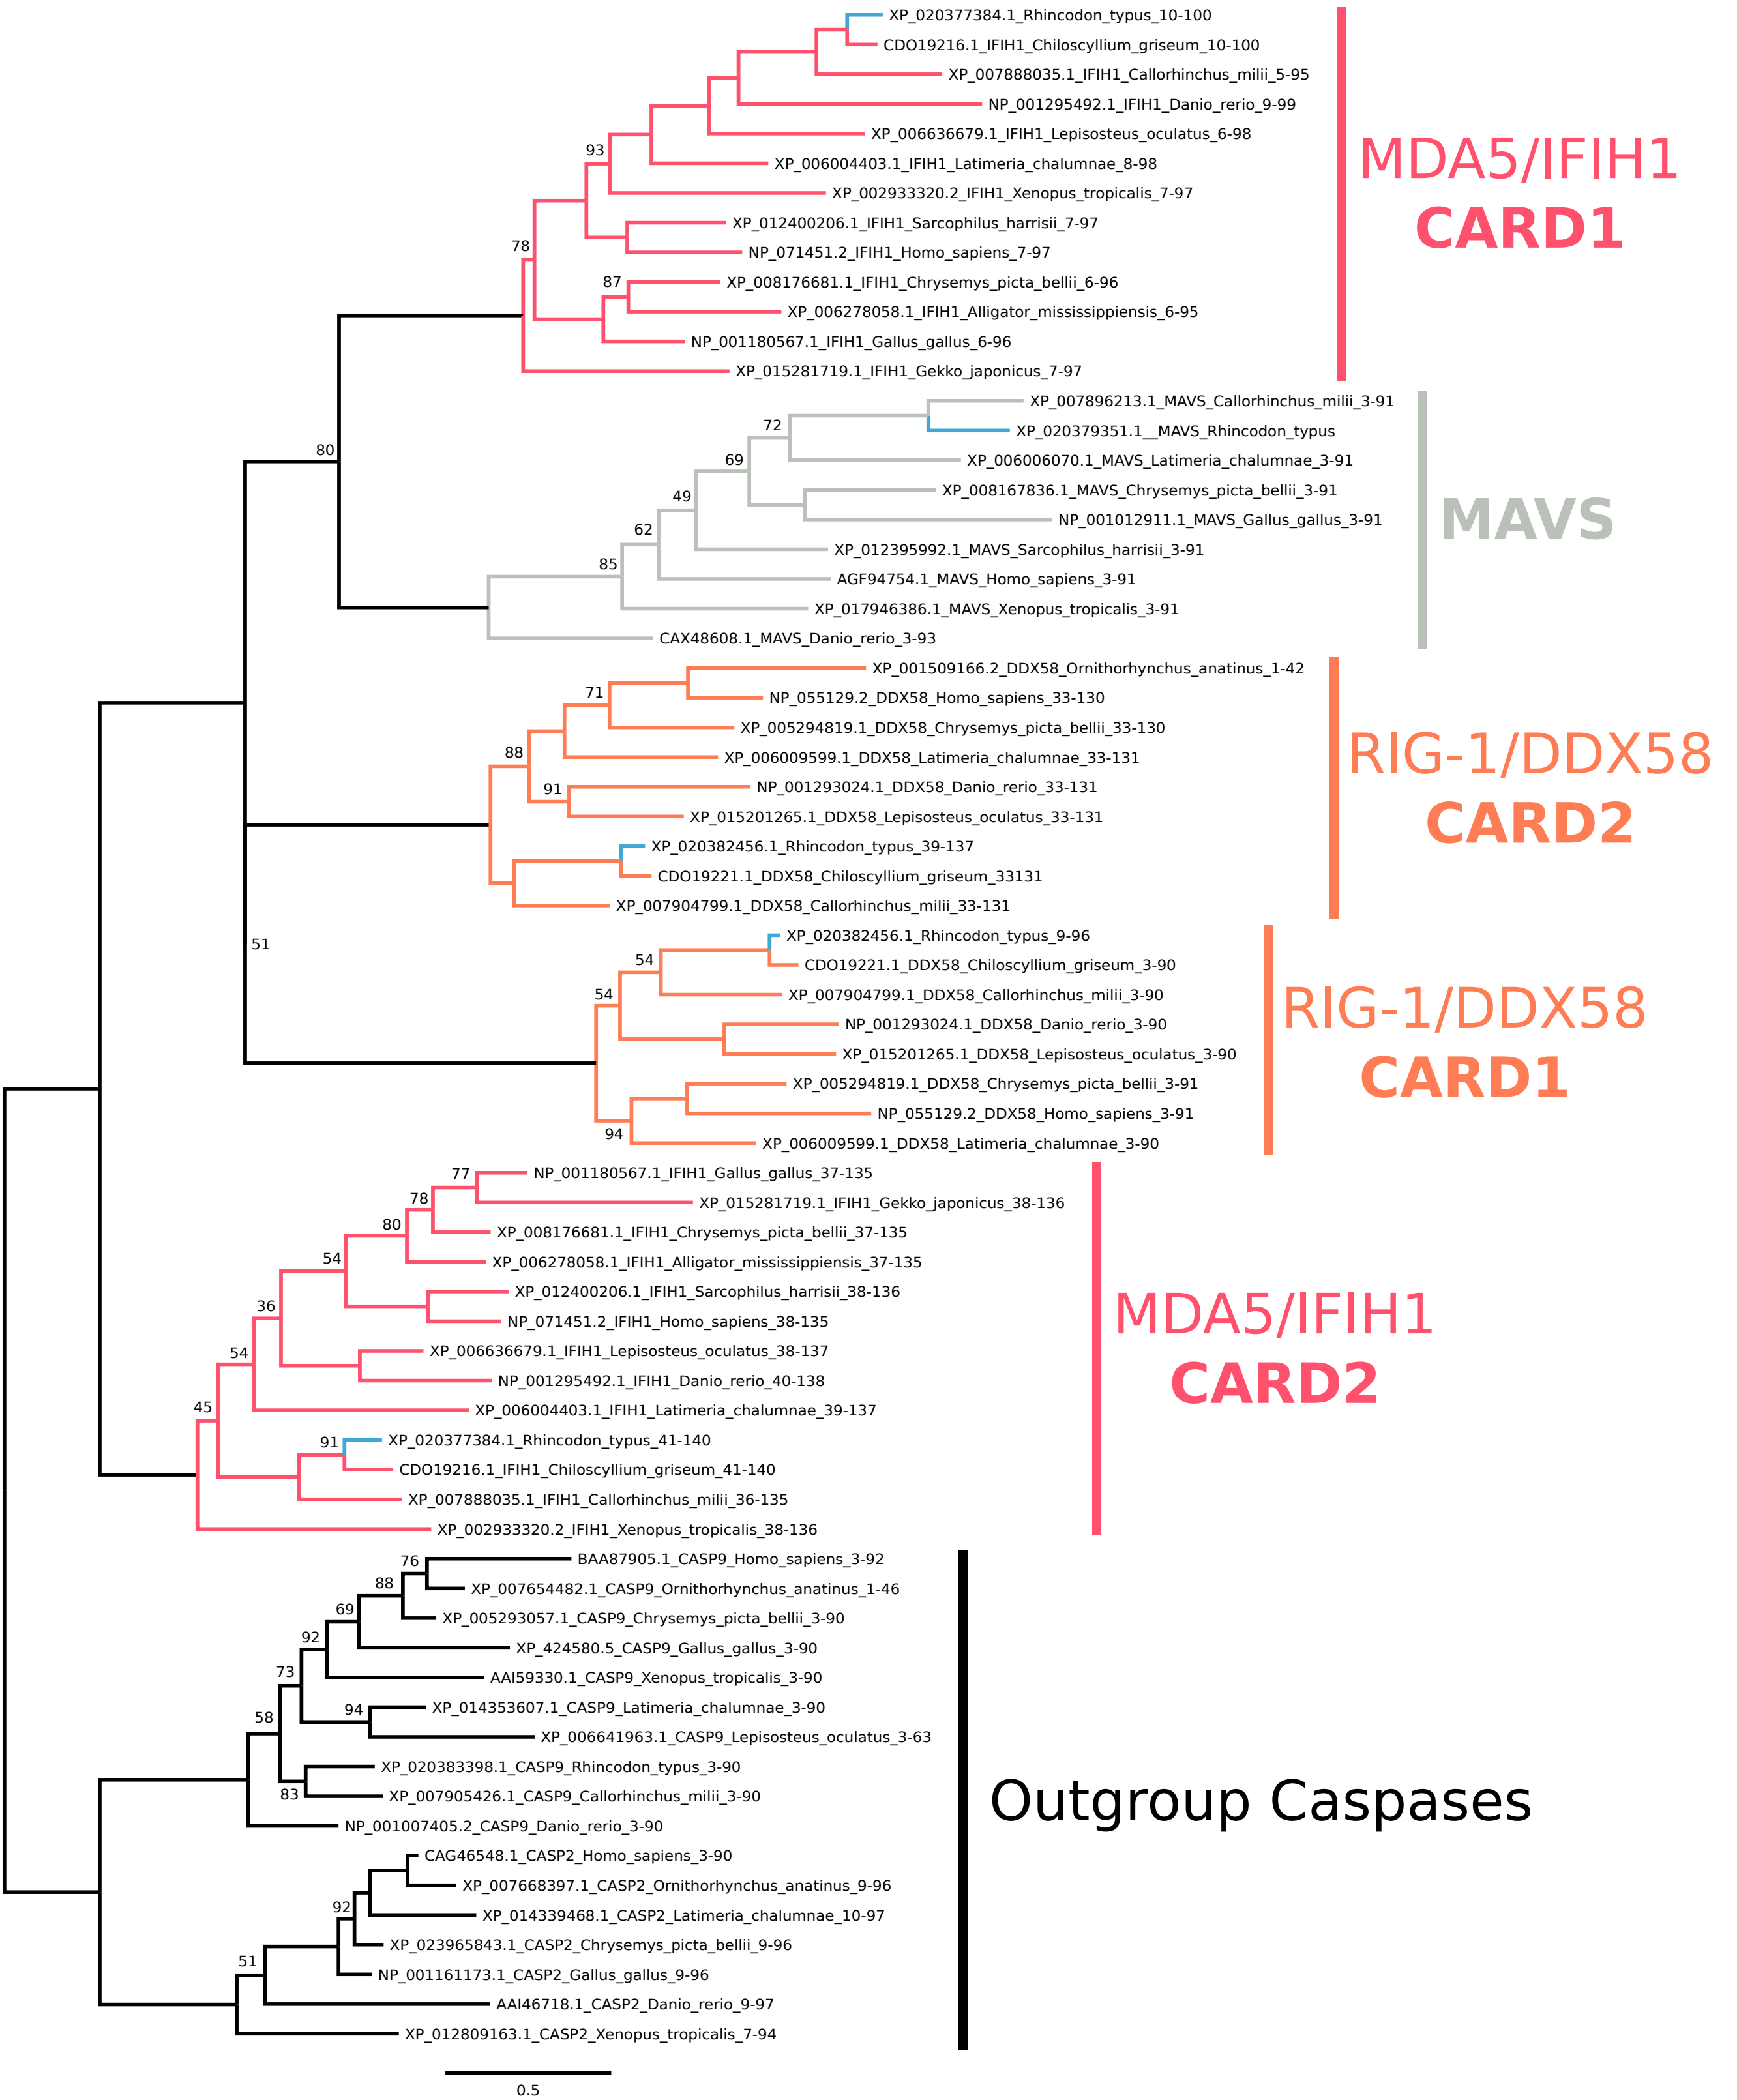

Supplement: supp [file elife-65394-supp-v1.zip]

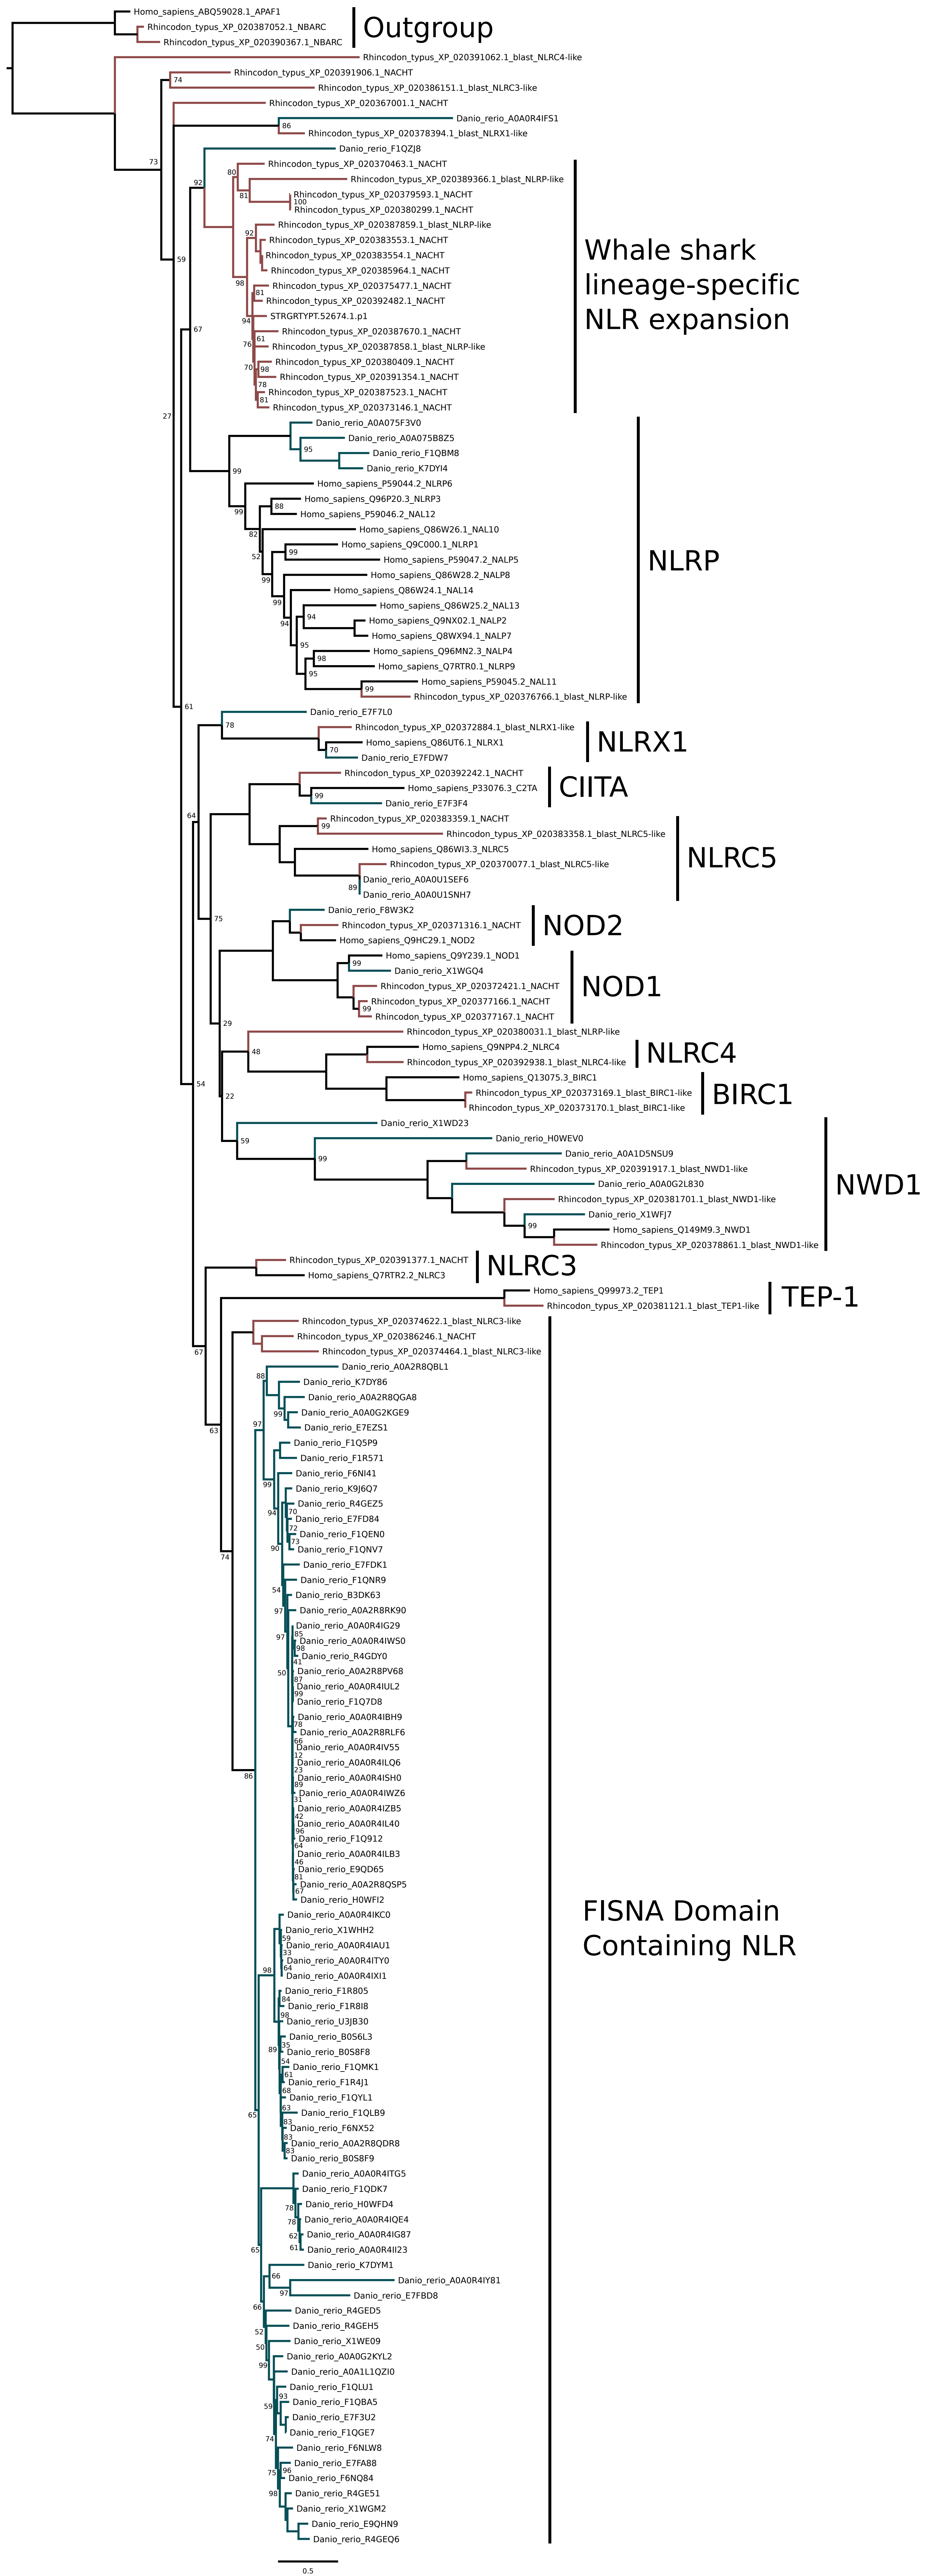

Supplement: supp [file elife-65394-supp-v1.zip]
